# Supplementary material for: A retrotransposon-derived DNA zip code internalizes myeloma cells through Clathrin-Rab5a-mediated endocytosis
Source: Frontiers journal article supplement (doi:10.3389/fonc.2024.1288724), 2024-02-23
Supplement: Data_Sheet_1.ZIP [file Data_Sheet_1.ZIP]

All Events - 2. Trypsin Cells+SEQ2 Cy5

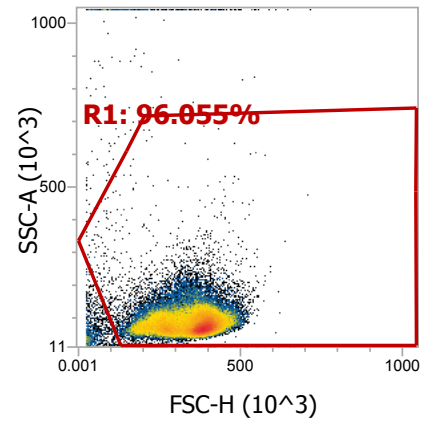

R1 - 2. Trypsin Cells+SEQ2 Cy5

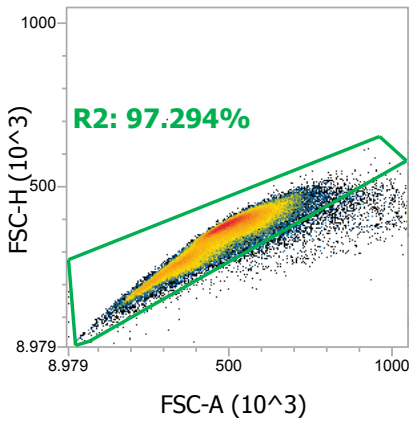

R2 - 2. Trypsin Cells+SEQ2 Cy5

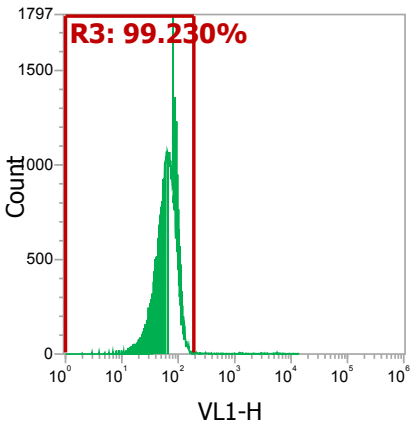

R3 - 2. Trypsin Cells+SEQ2 Cy5

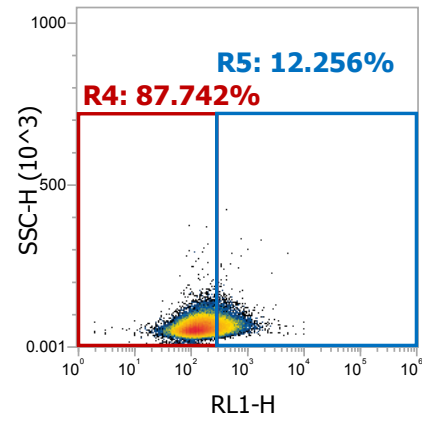

Experiment: **20210901**  
Sample: **2. Trypsin Cells+SEQ2 Cy5**  
Time Recorded: **10:29:31**

| Name         | Gate       | X Parameter | Y Parameter | Count  | %Total  | %Gated  |
|--------------|------------|-------------|-------------|--------|---------|---------|
| △ All Events | All Events | N/A         | N/A         | 67,131 | 100.000 | 100.000 |
| △ R1         | R1         | FSC - FSC-H | SSC - SSC-A | 64,483 | 96.055  | 96.055  |
| △ R2         | R2         | FSC - FSC-A | FSC - FSC-H | 62,738 | 93.456  | 97.294  |
| △ R3         | R3         | VL1 - VL1-H |             | 62,255 | 92.737  | 99.230  |
| R4           | R4         | RL1 - RL1-H | SSC - SSC-H | 54,624 | 81.369  | 87.742  |
| R5           | R5         | RL1 - RL1-H | SSC - SSC-H | 7,630  | 11.366  | 12.256  |

All Events - 3. Trypsin Cells+SEQ2 Cy5

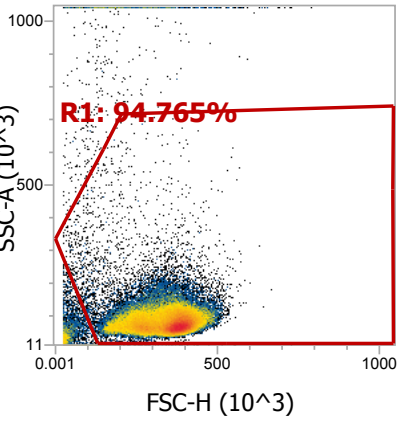

All Events - 3. Trypsin Cells+SEQ2 Cy5

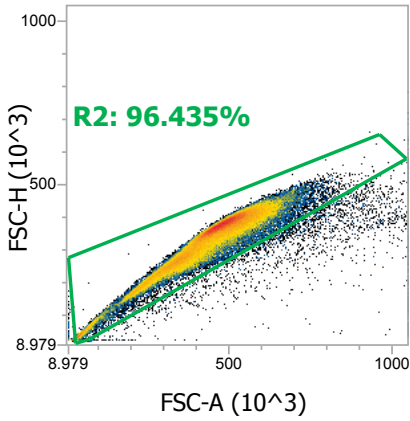

R2 - 3. Trypsin Cells+SEQ2 Cy5

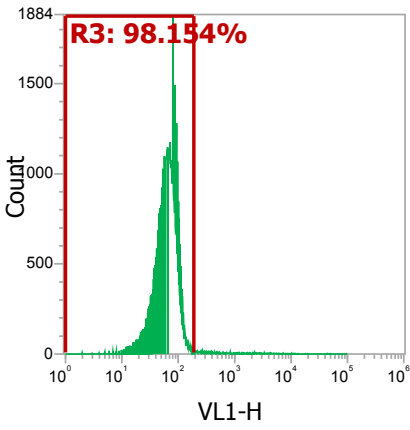

R3 - 3. Trypsin Cells+SEQ2 Cy5

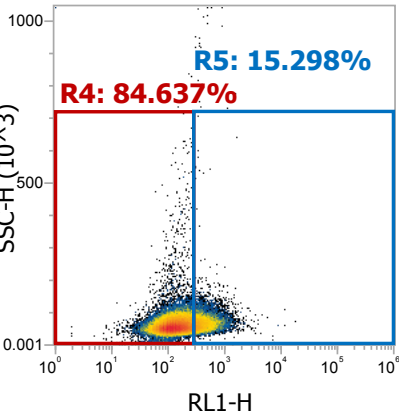

Experiment: **20210903**  
Sample: **3. Trypsin Cells+SEQ2 Cy5**  
Time Recorded: **12:30:15**

| Name         | Gate       | X Parameter | Y Parameter | Count  | %Total  | %Gated  |
|--------------|------------|-------------|-------------|--------|---------|---------|
| ▢ All Events | All Events | N/A         | N/A         | 71,808 | 100.000 | 100.000 |
| ▢ R1         | R1         | FSC - FSC-H | SSC - SSC-A | 68,049 | 94.765  | 94.765  |
| ▢ R2         | R2         | FSC - FSC-A | FSC - FSC-H | 69,248 | 96.435  | 96.435  |
| ▢ R3         | R3         | VL1 - VL1-H |             | 67,970 | 94.655  | 98.154  |
| ▢ R4         | R4         | RL1 - RL1-H | SSC - SSC-H | 57,528 | 80.114  | 84.637  |
| ▢ R5         | R5         | RL1 - RL1-H | SSC - SSC-H | 10,398 | 14.480  | 15.298  |

All Events - 4. Trypsin Cells+SEQ2 Cy5

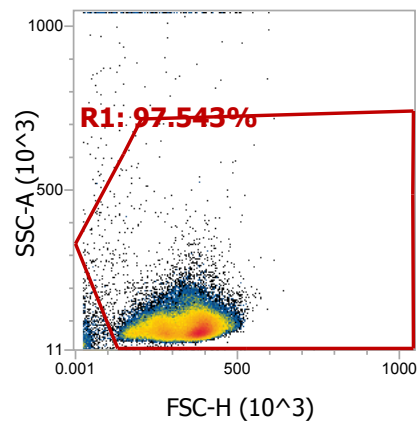

R1 - 4. Trypsin Cells+SEQ2 Cy5

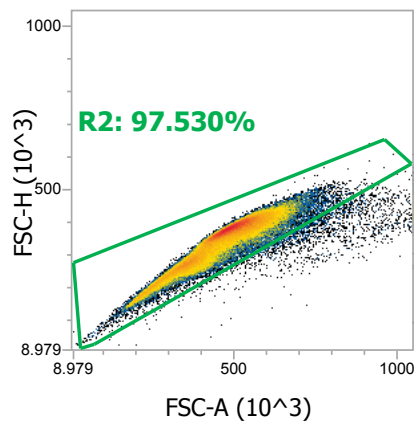

R2 - 4. Trypsin Cells+SEQ2 Cy5

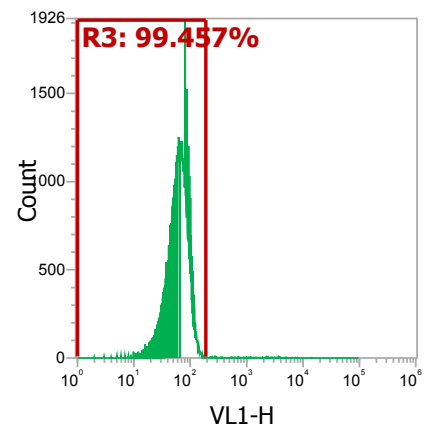

R3 - 4. Trypsin Cells+SEQ2 Cy5

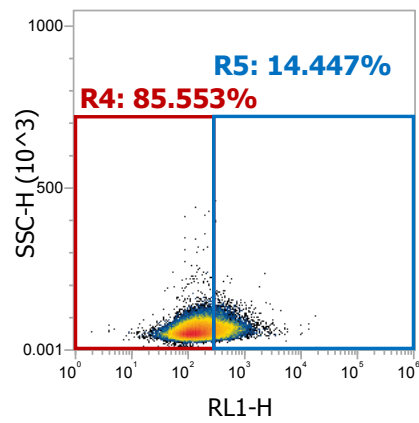

Experiment: **20210908**  
Sample: **4. Trypsin Cells+SEQ2 Cy5**  
Time Recorded: **11:47:44**

| Name       | Gate       | X Parameter | Y Parameter | Count  | %Total  | %Gated  |
|------------|------------|-------------|-------------|--------|---------|---------|
| All Events | All Events | N/A         | N/A         | 74,289 | 100.000 | 100.000 |
| R1         | R1         | FSC - FSC-H | SSC - SSC-A | 72,464 | 97.543  | 97.543  |
| R2         | R2         | FSC - FSC-A | FSC - FSC-H | 70,674 | 95.134  | 97.530  |
| R3         | R3         | VL1 - VL1-H |             | 70,290 | 94.617  | 99.457  |
| R4         | R4         | RL1 - RL1-H | SSC - SSC-H | 60,135 | 80.947  | 85.553  |
| R5         | R5         | RL1 - RL1-H | SSC - SSC-H | 10,155 | 13.670  | 14.447  |

All Events - 5. Trypsin Cells+SEQ2 Cy5

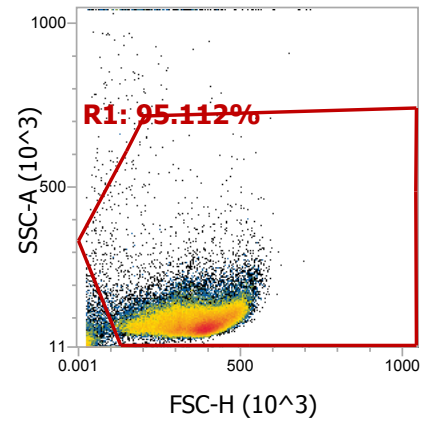

R1 - 5. Trypsin Cells+SEQ2 Cy5

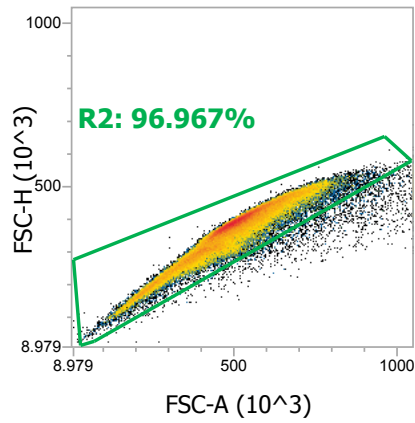

R2 - 5. Trypsin Cells+SEQ2 Cy5

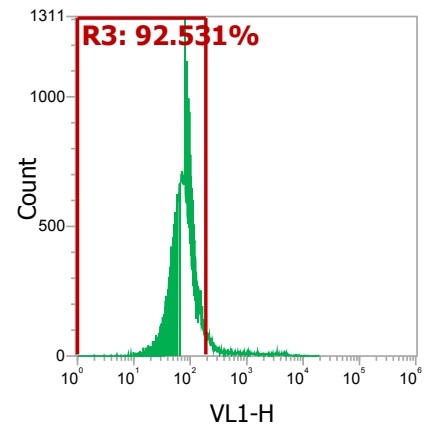

R3 - 5. Trypsin Cells+SEQ2 Cy5

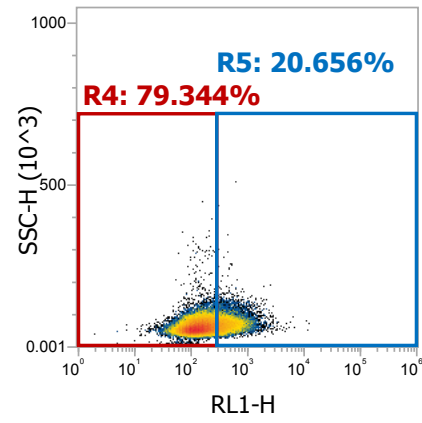

Experiment: **20210917**  
Sample: **5. Trypsin Cells+SEQ2 Cy5**  
Time Recorded: **09:14:45**

| Name         | Gate       | X Parameter | Y Parameter | Count  | %Total  | %Gated  |
|--------------|------------|-------------|-------------|--------|---------|---------|
| △ All Events | All Events | N/A         | N/A         | 57,920 | 100.000 | 100.000 |
| △ R1         | R1         | FSC - FSC-H | SSC - SSC-A | 55,089 | 95.112  | 95.112  |
| △ R2         | R2         | FSC - FSC-A | FSC - FSC-H | 53,418 | 92.227  | 96.967  |
| △ R3         | R3         | VL1 - VL1-H |             | 49,428 | 85.338  | 92.531  |
| R4           | R4         | RL1 - RL1-H | SSC - SSC-H | 39,218 | 67.711  | 79.344  |
| R5           | R5         | RL1 - RL1-H | SSC - SSC-H | 10,210 | 17.628  | 20.656  |

All Events - 6. Trypsin Cells+SEQ2 Cy5

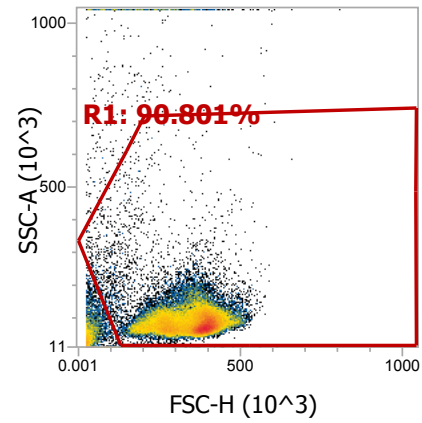

R1 - 6. Trypsin Cells+SEQ2 Cy5

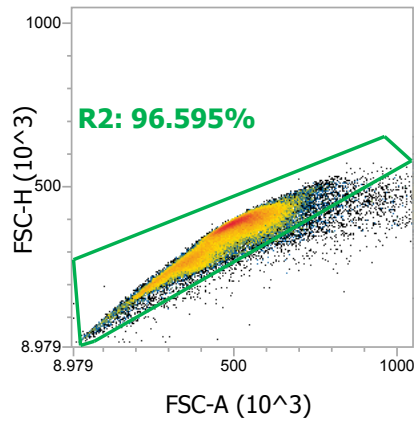

R2 - 6. Trypsin Cells+SEQ2 Cy5

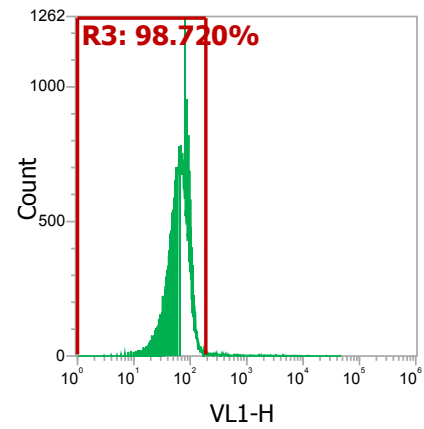

R3 - 6. Trypsin Cells+SEQ2 Cy5

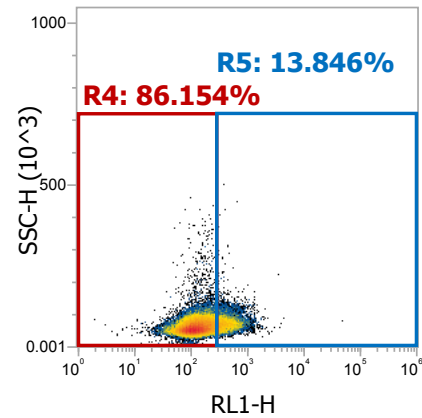

Experiment: **20210923**  
Sample: **6. Trypsin Cells+SEQ2 Cy5**  
Time Recorded: **13:03:28**

| Name       | Gate       | X Parameter | Y Parameter | Count  | %Total  | %Gated  |
|------------|------------|-------------|-------------|--------|---------|---------|
| All Events | All Events | N/A         | N/A         | 50,397 | 100.000 | 100.000 |
| R1         | R1         | FSC - FSC-H | SSC - SSC-A | 45,761 | 90.801  | 90.801  |
| R2         | R2         | FSC - FSC-A | FSC - FSC-H | 44,203 | 87.710  | 96.595  |
| R3         | R3         | VL1 - VL1-H |             | 43,637 | 86.587  | 98.720  |
| R4         | R4         | RL1 - RL1-H | SSC - SSC-H | 37,595 | 74.598  | 86.154  |
| R5         | R5         | RL1 - RL1-H | SSC - SSC-H | 6,042  | 11.989  | 13.846  |
