# Supplementary material for: A retrotransposon-derived DNA zip code internalizes myeloma cells through Clathrin-Rab5a-mediated endocytosis
Source: Frontiers journal article supplement (doi:10.3389/fonc.2024.1288724), 2024-02-23
Supplement: Data_Sheet_1.ZIP [file Data_Sheet_1.ZIP]

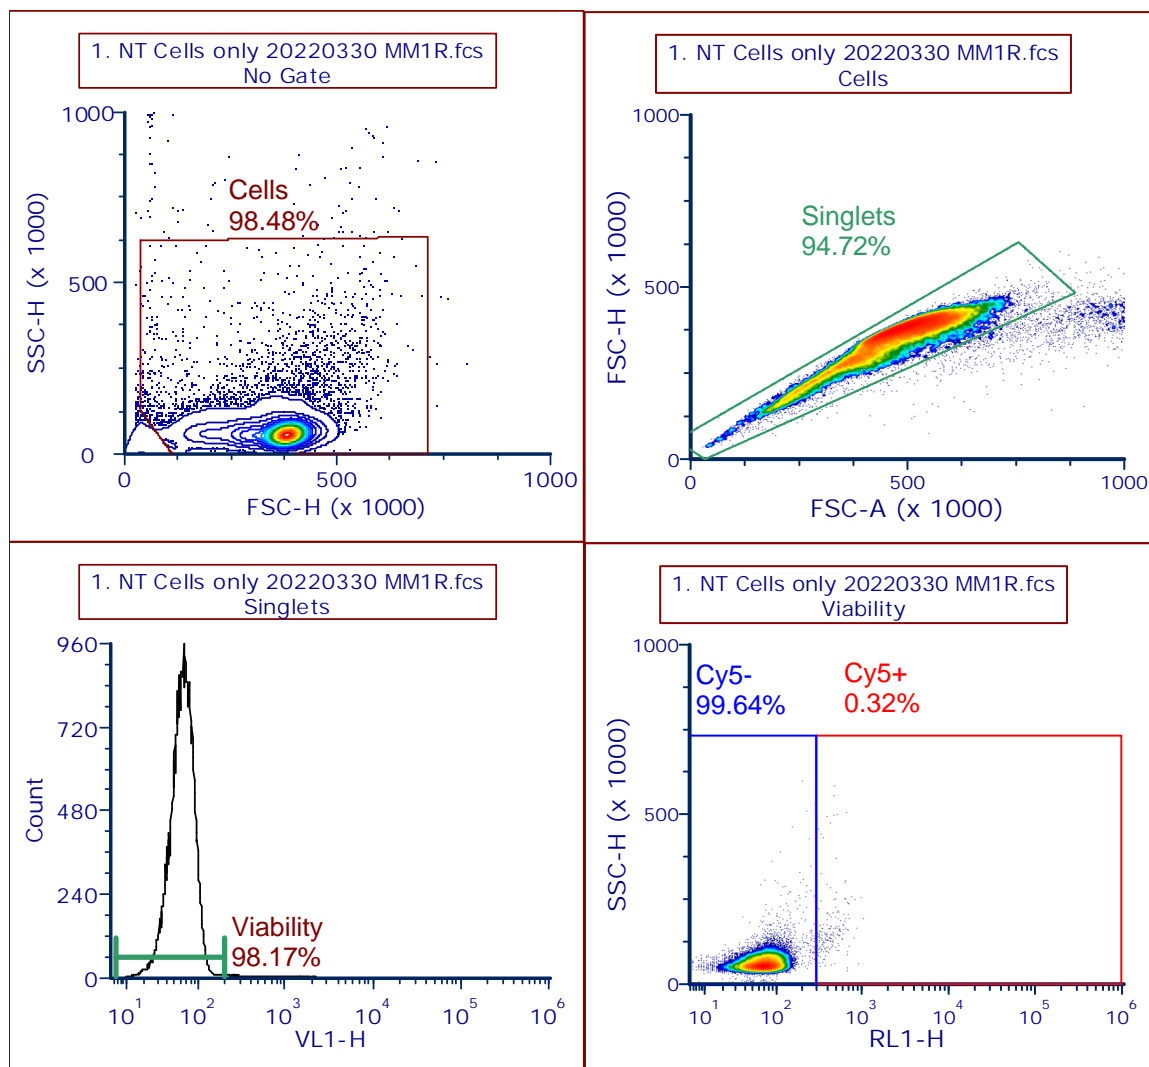

|   | A              | B          | C           | D              | E                |  |
|---|----------------|------------|-------------|----------------|------------------|--|
| 1 | Filename       | Gate       | # of Events | % of all cells | % of gated cells |  |
| 2 | 1. NT Cells on | All Events | 63906       | 100            | 100              |  |
| 3 | 1. NT Cells on | Cells      | 62935       | 98.48          | 98.48            |  |
| 4 | 1. NT Cells on | Singlets   | 59611       | 93.28          | 94.72            |  |
| 5 | 1. NT Cells on | Viability  | 58521       | 91.57          | 98.17            |  |
| 6 | 1. NT Cells on | Cy5+       | 190         | 0.3            | 0.32             |  |
| 7 | 1. NT Cells on | Cy5-       | 58312       | 91.25          | 99.64            |  |
| 8 |                |            |             |                |                  |  |
| 9 |                |            |             |                |                  |  |

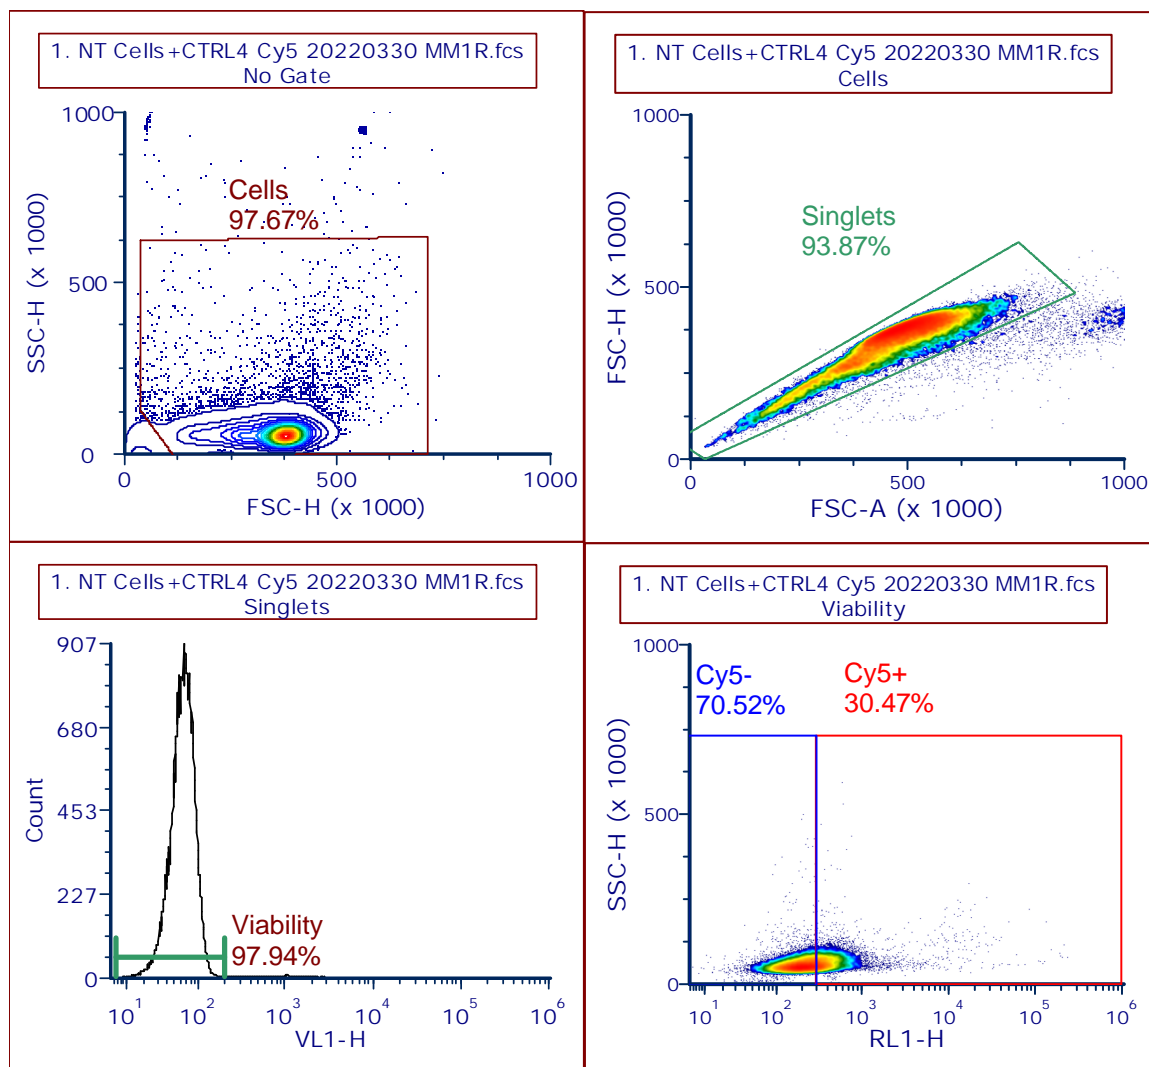

|   | A             | B          | C           | D              | E                |  |
|---|---------------|------------|-------------|----------------|------------------|--|
| 1 | Filename      | Gate       | # of Events | % of all cells | % of gated cells |  |
| 2 | 1. NT Cells+C | All Events | 61605       | 100            | 100              |  |
| 3 | 1. NT Cells+C | Cells      | 60168       | 97.67          | 97.67            |  |
| 4 | 1. NT Cells+C | Singlets   | 56477       | 91.68          | 93.87            |  |
| 5 | 1. NT Cells+C | Viability  | 55315       | 89.79          | 97.94            |  |
| 6 | 1. NT Cells+C | Cy5+       | 16853       | 27.36          | 30.47            |  |
| 7 | 1. NT Cells+C | Cy5-       | 39007       | 63.32          | 70.52            |  |
| 8 |               |            |             |                |                  |  |
| 9 |               |            |             |                |                  |  |

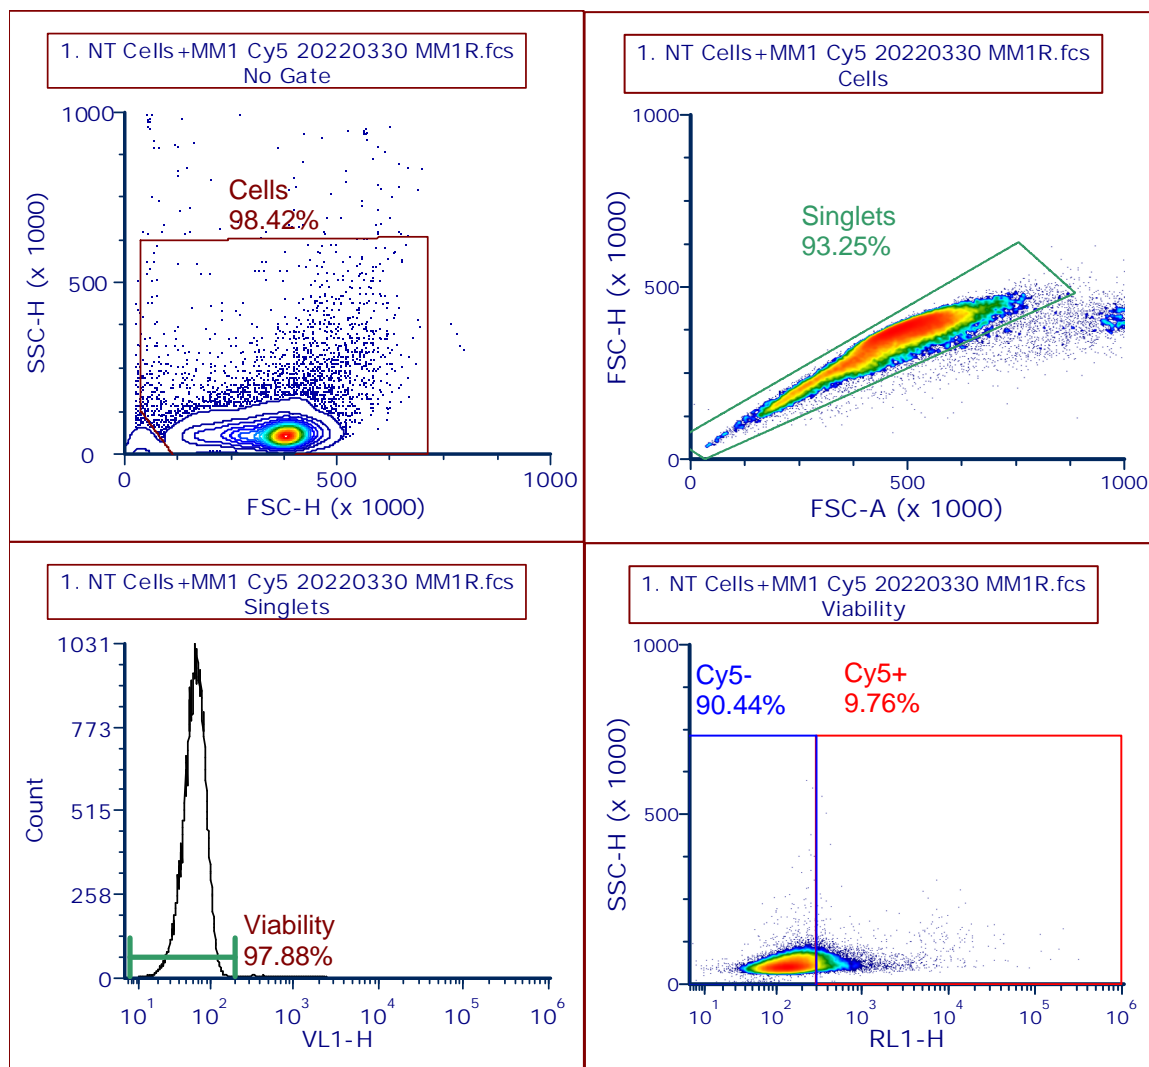

|   | A              | B          | C           | D              | E                |
|---|----------------|------------|-------------|----------------|------------------|
| 1 | Filename       | Gate       | # of Events | % of all cells | % of gated cells |
| 2 | 1. NT Cells+IV | All Events | 69763       | 100            | 100              |
| 3 | 1. NT Cells+IV | Cells      | 68664       | 98.42          | 98.42            |
| 4 | 1. NT Cells+IV | Singlets   | 64032       | 91.79          | 93.25            |
| 5 | 1. NT Cells+IV | Viability  | 62677       | 89.84          | 97.88            |
| 6 | 1. NT Cells+IV | Cy5+       | 6117        | 8.77           | 9.76             |
| 7 | 1. NT Cells+IV | Cy5-       | 56684       | 81.25          | 90.44            |
| 8 |                |            |             |                |                  |
| 9 |                |            |             |                |                  |

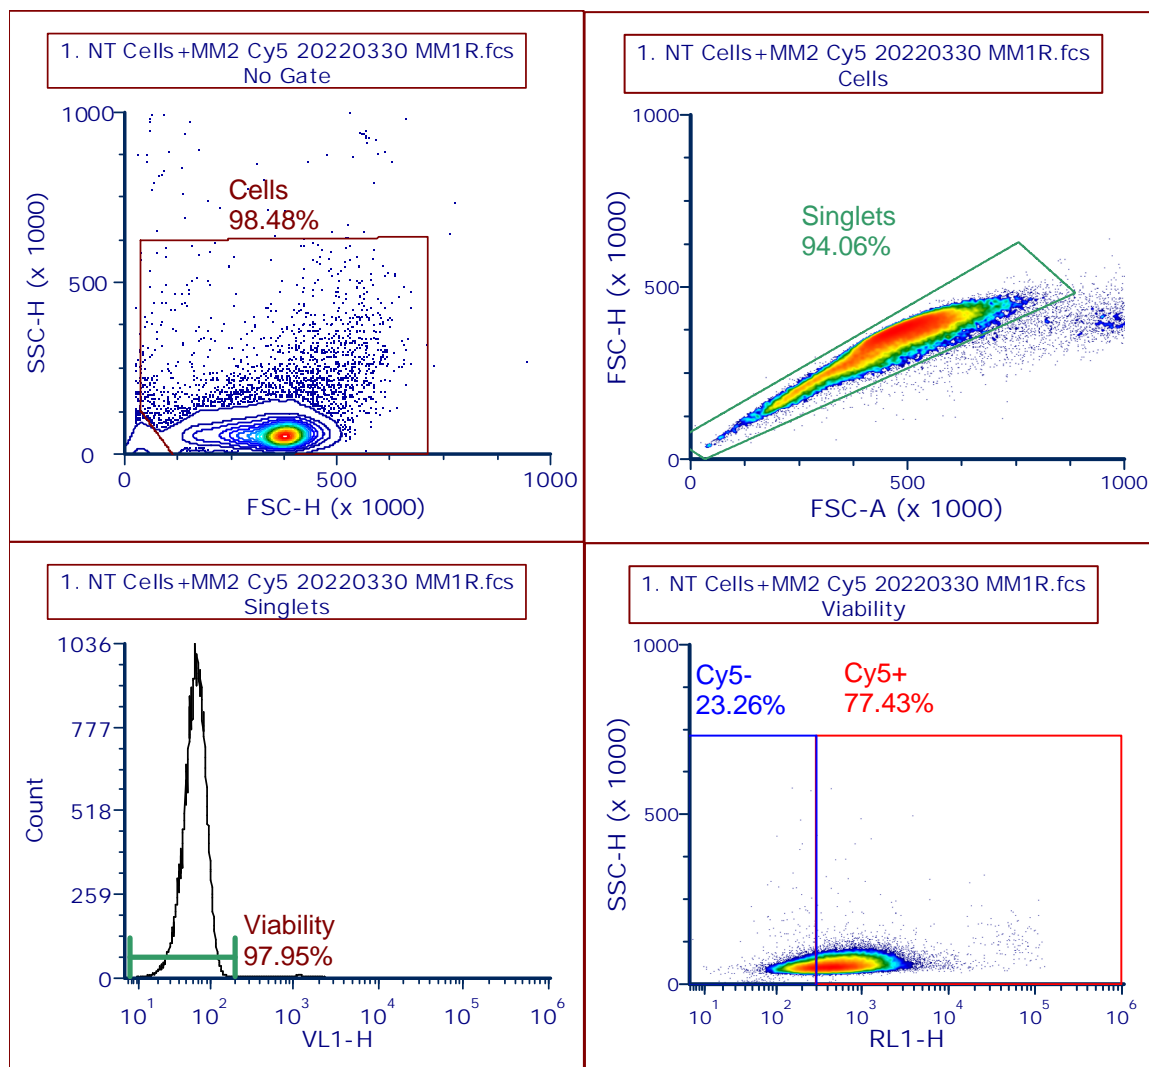

|   | A              | B          | C           | D              | E                |  |
|---|----------------|------------|-------------|----------------|------------------|--|
| 1 | Filename       | Gate       | # of Events | % of all cells | % of gated cells |  |
| 2 | 1. NT Cells+IV | All Events | 68525       | 100            | 100              |  |
| 3 | 1. NT Cells+IV | Cells      | 67484       | 98.48          | 98.48            |  |
| 4 | 1. NT Cells+IV | Singlets   | 63476       | 92.63          | 94.06            |  |
| 5 | 1. NT Cells+IV | Viability  | 62172       | 90.73          | 97.95            |  |
| 6 | 1. NT Cells+IV | Cy5+       | 48142       | 70.25          | 77.43            |  |
| 7 | 1. NT Cells+IV | Cy5-       | 14459       | 21.1           | 23.26            |  |
| 8 |                |            |             |                |                  |  |
| 9 |                |            |             |                |                  |  |

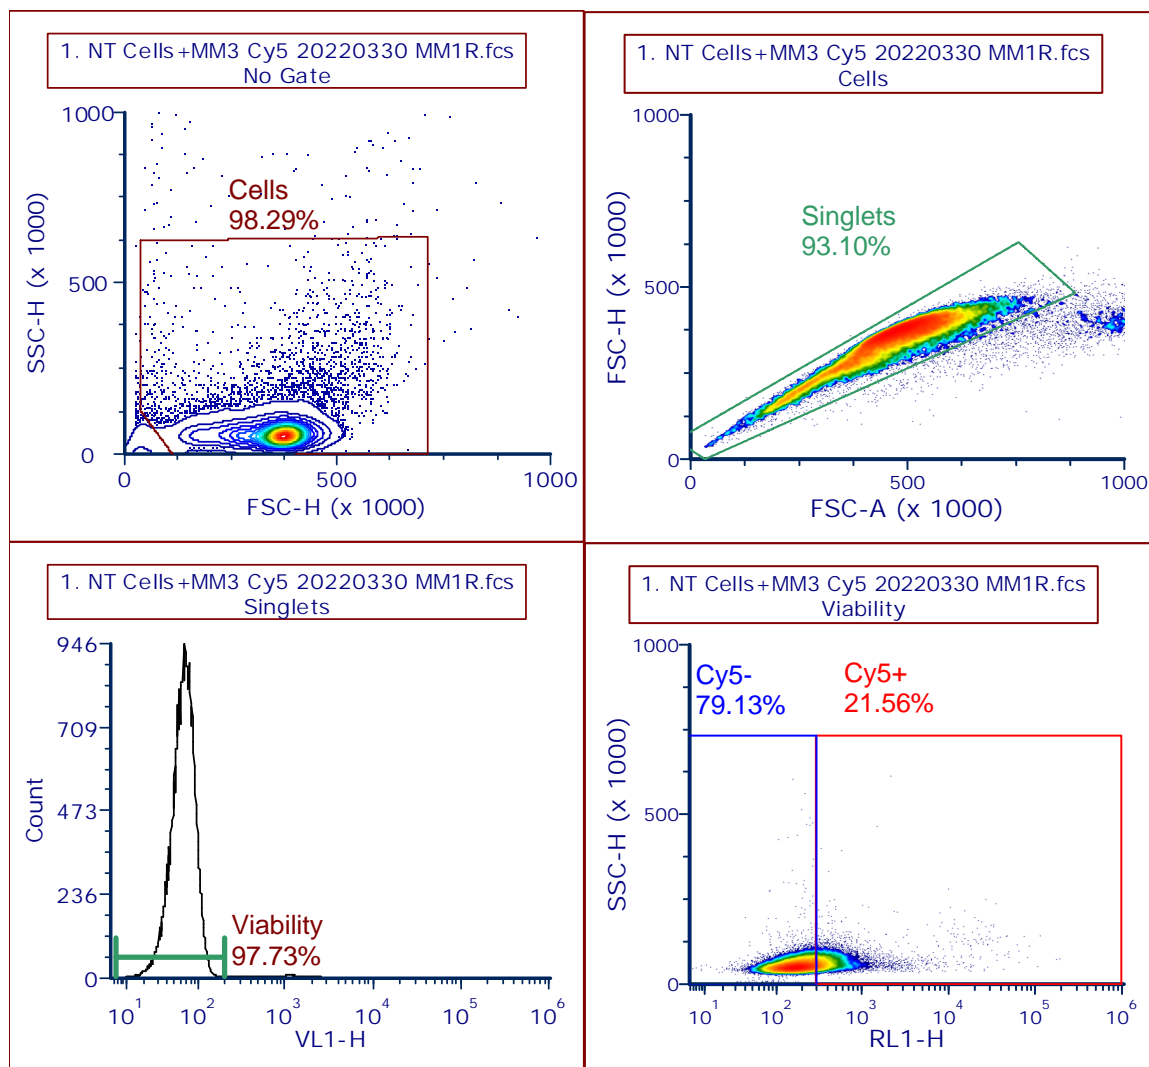

|   | A              | B          | C           | D              | E                |  |
|---|----------------|------------|-------------|----------------|------------------|--|
| 1 | Filename       | Gate       | # of Events | % of all cells | % of gated cells |  |
| 2 | 1. NT Cells+IV | All Events | 64044       | 100            | 100              |  |
| 3 | 1. NT Cells+IV | Cells      | 62952       | 98.29          | 98.29            |  |
| 4 | 1. NT Cells+IV | Singlets   | 58609       | 91.51          | 93.1             |  |
| 5 | 1. NT Cells+IV | Viability  | 57276       | 89.43          | 97.73            |  |
| 6 | 1. NT Cells+IV | Cy5+       | 12349       | 19.28          | 21.56            |  |
| 7 | 1. NT Cells+IV | Cy5-       | 45320       | 70.76          | 79.13            |  |
| 8 |                |            |             |                |                  |  |
| 9 |                |            |             |                |                  |  |

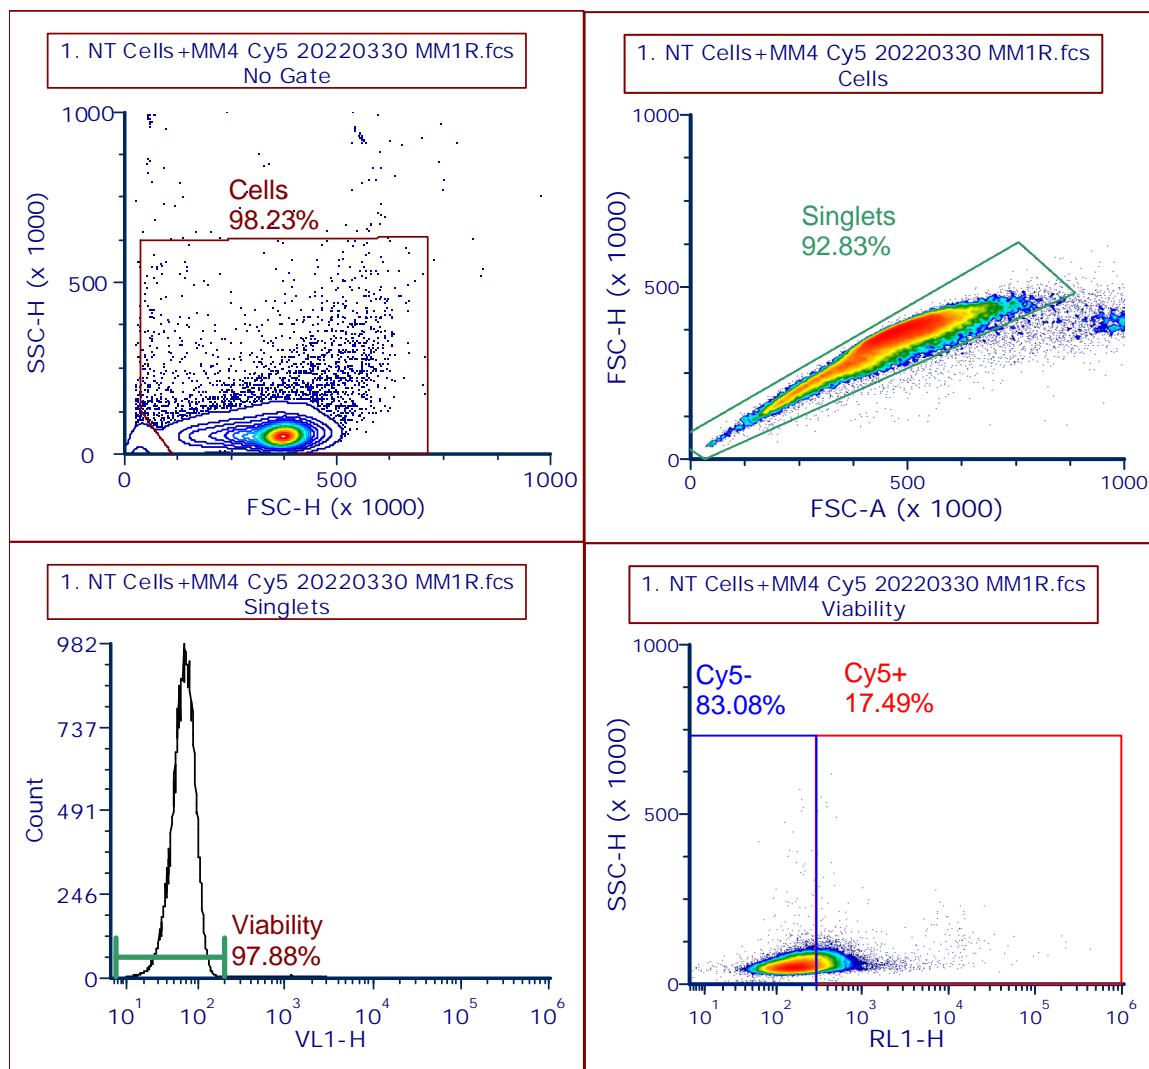

|   | A              | B          | C           | D              | E                |  |
|---|----------------|------------|-------------|----------------|------------------|--|
| 1 | Filename       | Gate       | # of Events | % of all cells | % of gated cells |  |
| 2 | 1. NT Cells+IV | All Events | 67536       | 100            | 100              |  |
| 3 | 1. NT Cells+IV | Cells      | 66342       | 98.23          | 98.23            |  |
| 4 | 1. NT Cells+IV | Singlets   | 61584       | 91.19          | 92.83            |  |
| 5 | 1. NT Cells+IV | Viability  | 60276       | 89.25          | 97.88            |  |
| 6 | 1. NT Cells+IV | Cy5+       | 10541       | 15.61          | 17.49            |  |
| 7 | 1. NT Cells+IV | Cy5-       | 50075       | 74.15          | 83.08            |  |
| 8 |                |            |             |                |                  |  |
| 9 |                |            |             |                |                  |  |

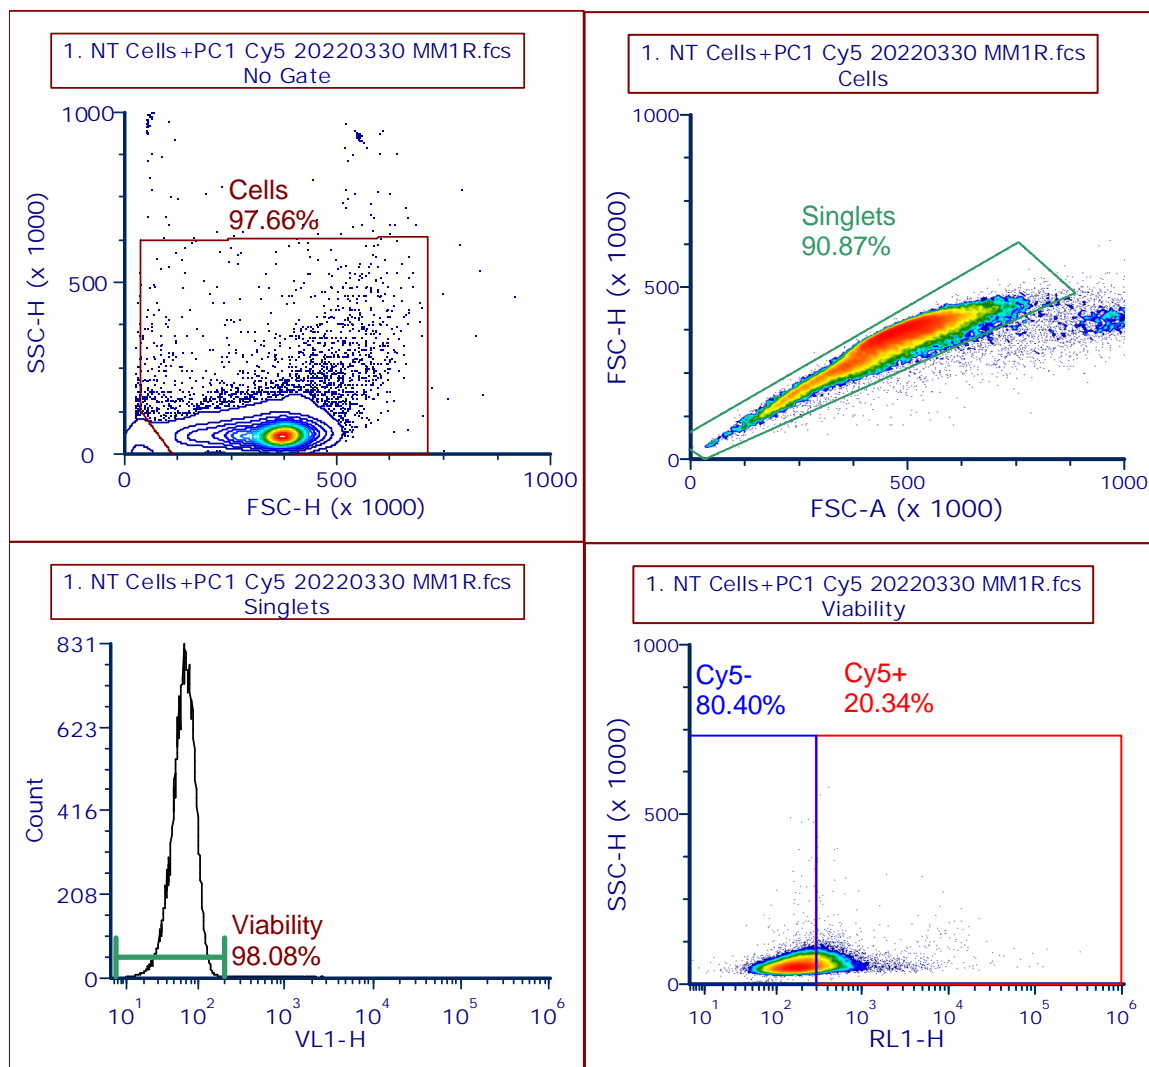

|   | A               | B          | C           | D              | E                |  |
|---|-----------------|------------|-------------|----------------|------------------|--|
| 1 | Filename        | Gate       | # of Events | % of all cells | % of gated cells |  |
| 2 | 1. NT Cells+PC1 | All Events | 58037       | 100            | 100              |  |
| 3 | 1. NT Cells+PC1 | Cells      | 56680       | 97.66          | 97.66            |  |
| 4 | 1. NT Cells+PC1 | Singlets   | 51504       | 88.74          | 90.87            |  |
| 5 | 1. NT Cells+PC1 | Viability  | 50517       | 87.04          | 98.08            |  |
| 6 | 1. NT Cells+PC1 | Cy5+       | 10277       | 17.71          | 20.34            |  |
| 7 | 1. NT Cells+PC1 | Cy5-       | 40614       | 69.98          | 80.4             |  |
| 8 |                 |            |             |                |                  |  |
| 9 |                 |            |             |                |                  |  |

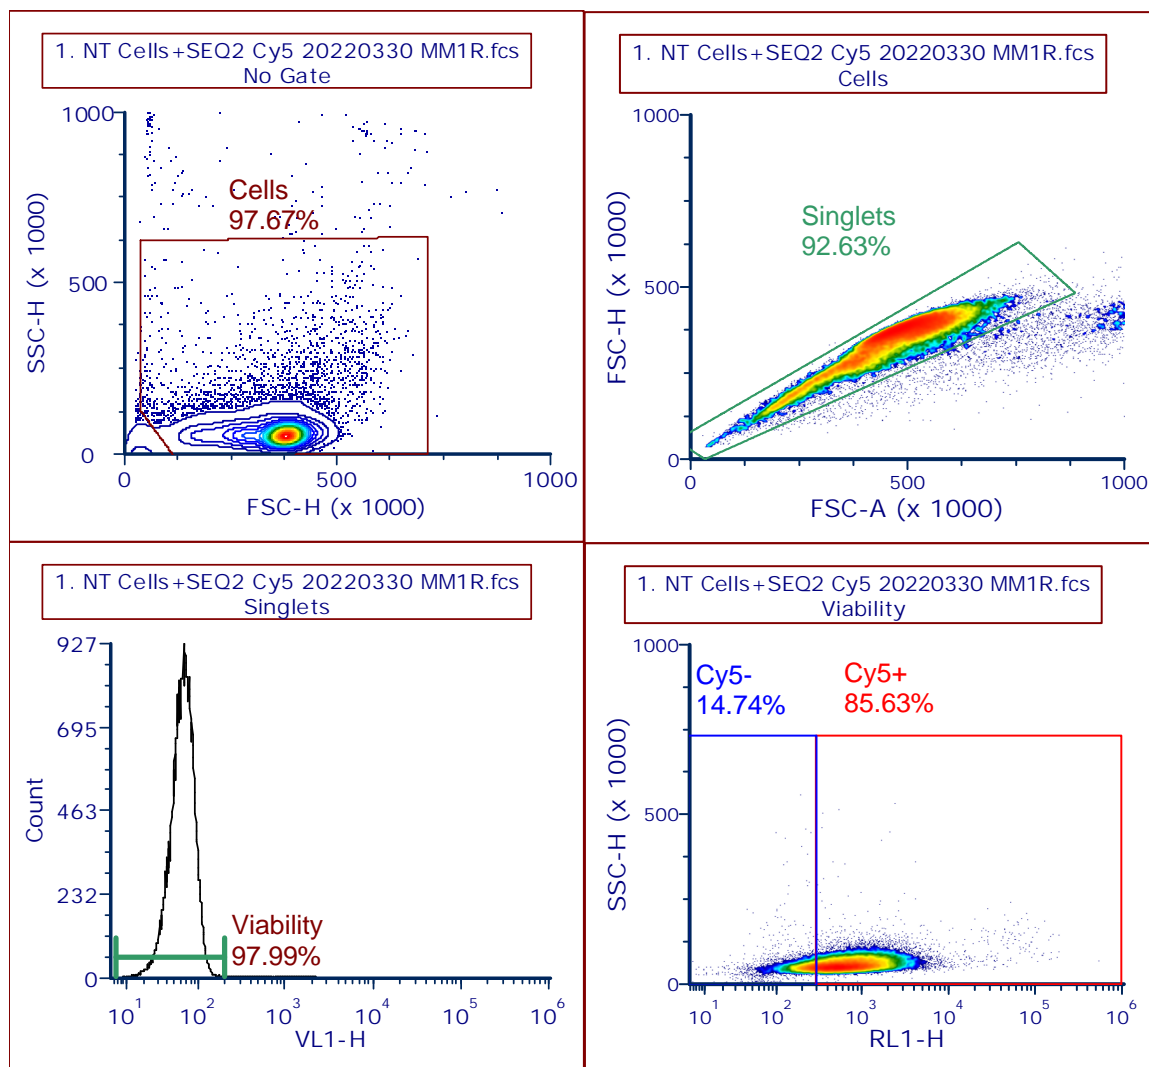

|   | A             | B          | C           | D              | E                |  |
|---|---------------|------------|-------------|----------------|------------------|--|
| 1 | Filename      | Gate       | # of Events | % of all cells | % of gated cells |  |
| 2 | 1. NT Cells+S | All Events | 62929       | 100            | 100              |  |
| 3 | 1. NT Cells+S | Cells      | 61464       | 97.67          | 97.67            |  |
| 4 | 1. NT Cells+S | Singlets   | 56937       | 90.48          | 92.63            |  |
| 5 | 1. NT Cells+S | Viability  | 55791       | 88.66          | 97.99            |  |
| 6 | 1. NT Cells+S | Cy5+       | 47773       | 75.92          | 85.63            |  |
| 7 | 1. NT Cells+S | Cy5-       | 8223        | 13.07          | 14.74            |  |
| 8 |               |            |             |                |                  |  |
| 9 |               |            |             |                |                  |  |



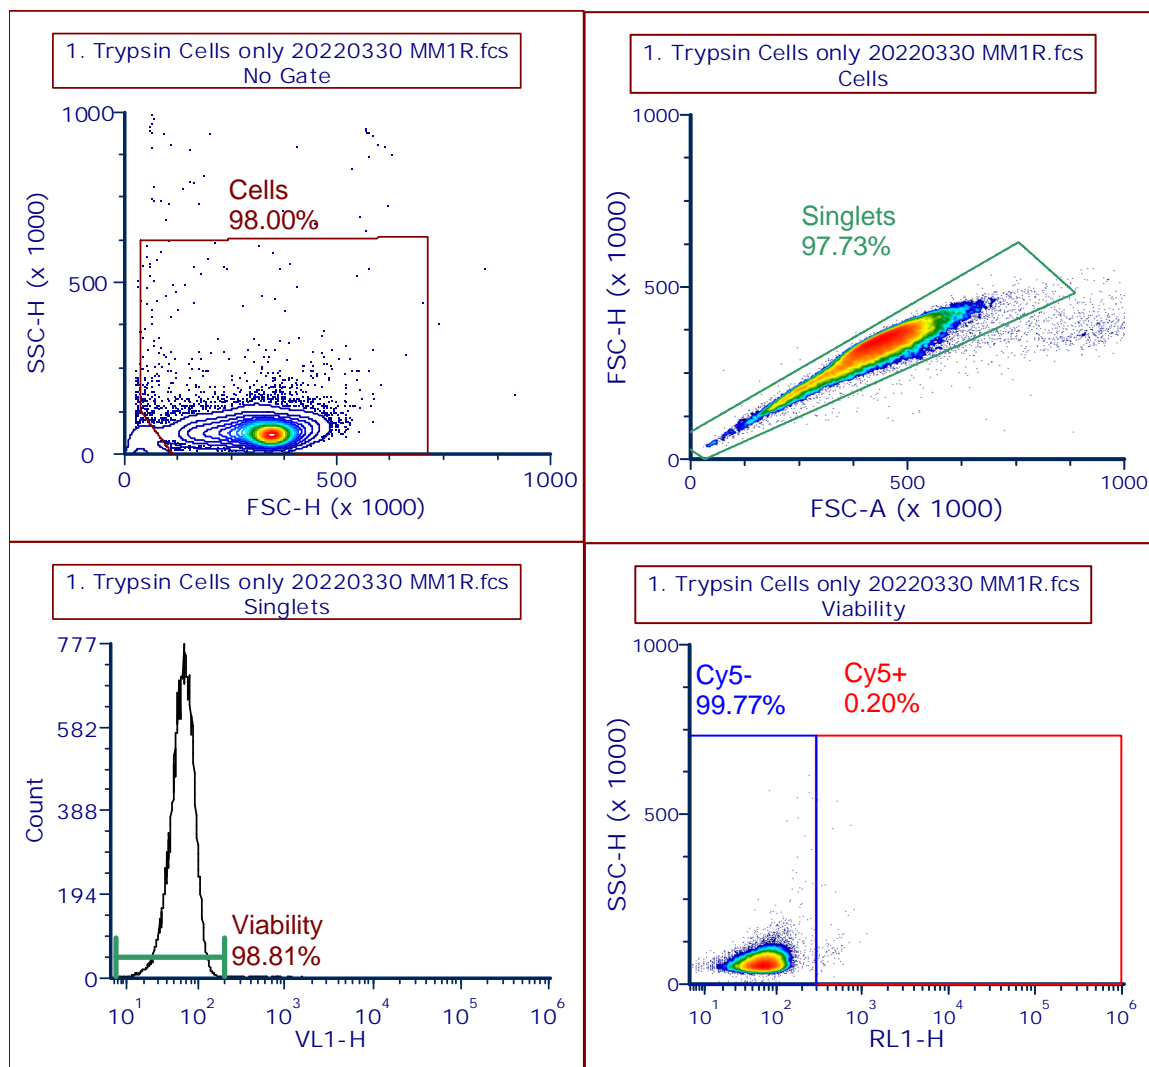

|   | A             | B          | C           | D              | E                |  |
|---|---------------|------------|-------------|----------------|------------------|--|
| 1 | Filename      | Gate       | # of Events | % of all cells | % of gated cells |  |
| 2 | 1. Trypsin Ce | All Events | 50750       | 100            | 100              |  |
| 3 | 1. Trypsin Ce | Cells      | 49733       | 98             | 98               |  |
| 4 | 1. Trypsin Ce | Singlets   | 48605       | 95.77          | 97.73            |  |
| 5 | 1. Trypsin Ce | Viability  | 48025       | 94.63          | 98.81            |  |
| 6 | 1. Trypsin Ce | Cy5+       | 94          | 0.19           | 0.2              |  |
| 7 | 1. Trypsin Ce | Cy5-       | 47915       | 94.41          | 99.77            |  |
| 8 |               |            |             |                |                  |  |
| 9 |               |            |             |                |                  |  |

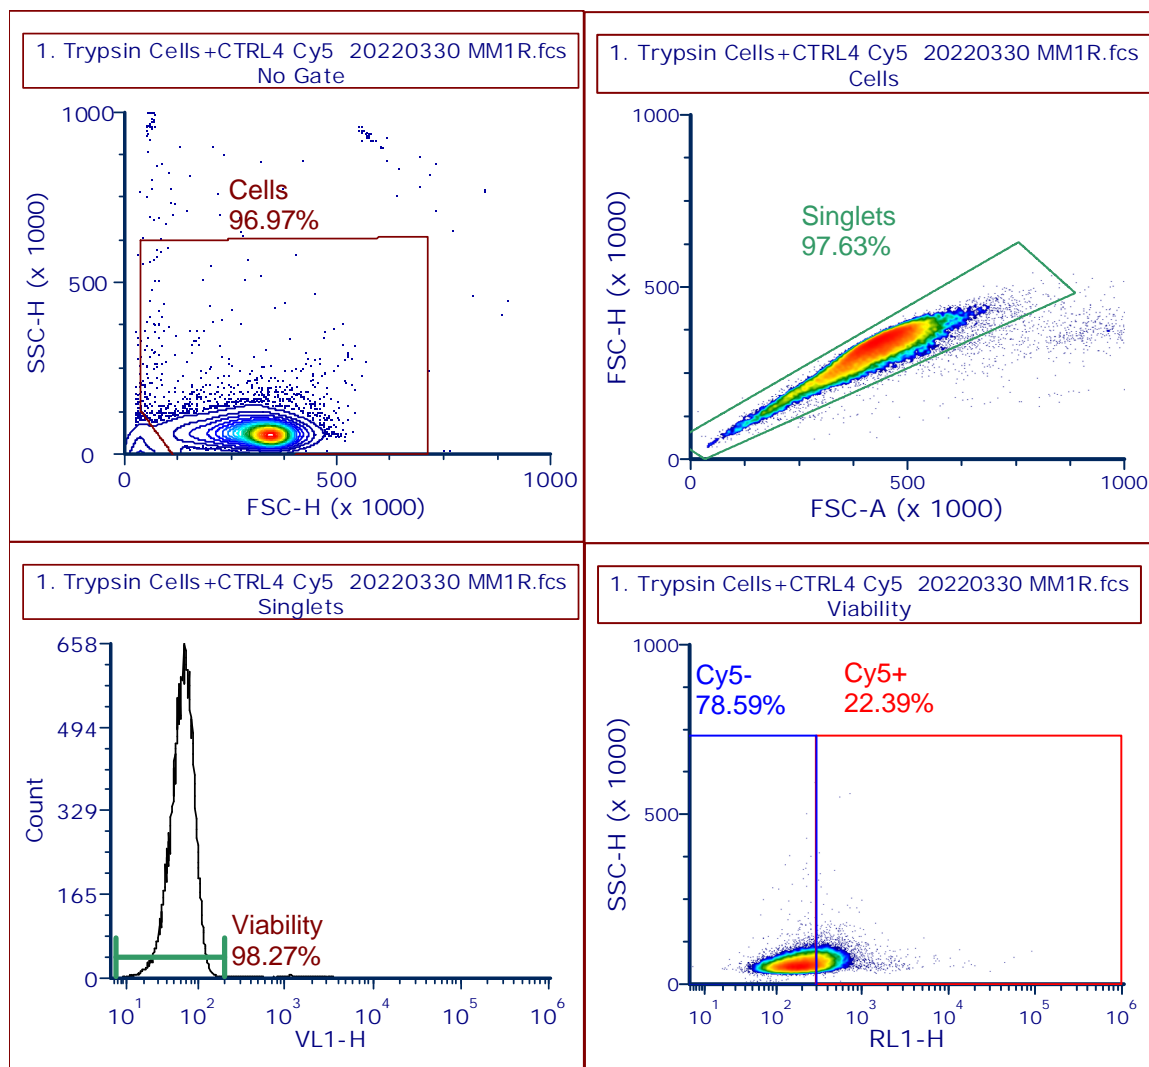

|   | A             | B          | C           | D              | E                |  |
|---|---------------|------------|-------------|----------------|------------------|--|
| 1 | Filename      | Gate       | # of Events | % of all cells | % of gated cells |  |
| 2 | 1. Trypsin Ce | All Events | 43375       | 100            | 100              |  |
| 3 | 1. Trypsin Ce | Cells      | 42062       | 96.97          | 96.97            |  |
| 4 | 1. Trypsin Ce | Singlets   | 41064       | 94.67          | 97.63            |  |
| 5 | 1. Trypsin Ce | Viability  | 40353       | 93.03          | 98.27            |  |
| 6 | 1. Trypsin Ce | Cy5+       | 9035        | 20.83          | 22.39            |  |
| 7 | 1. Trypsin Ce | Cy5-       | 31715       | 73.12          | 78.59            |  |
| 8 |               |            |             |                |                  |  |
| 9 |               |            |             |                |                  |  |

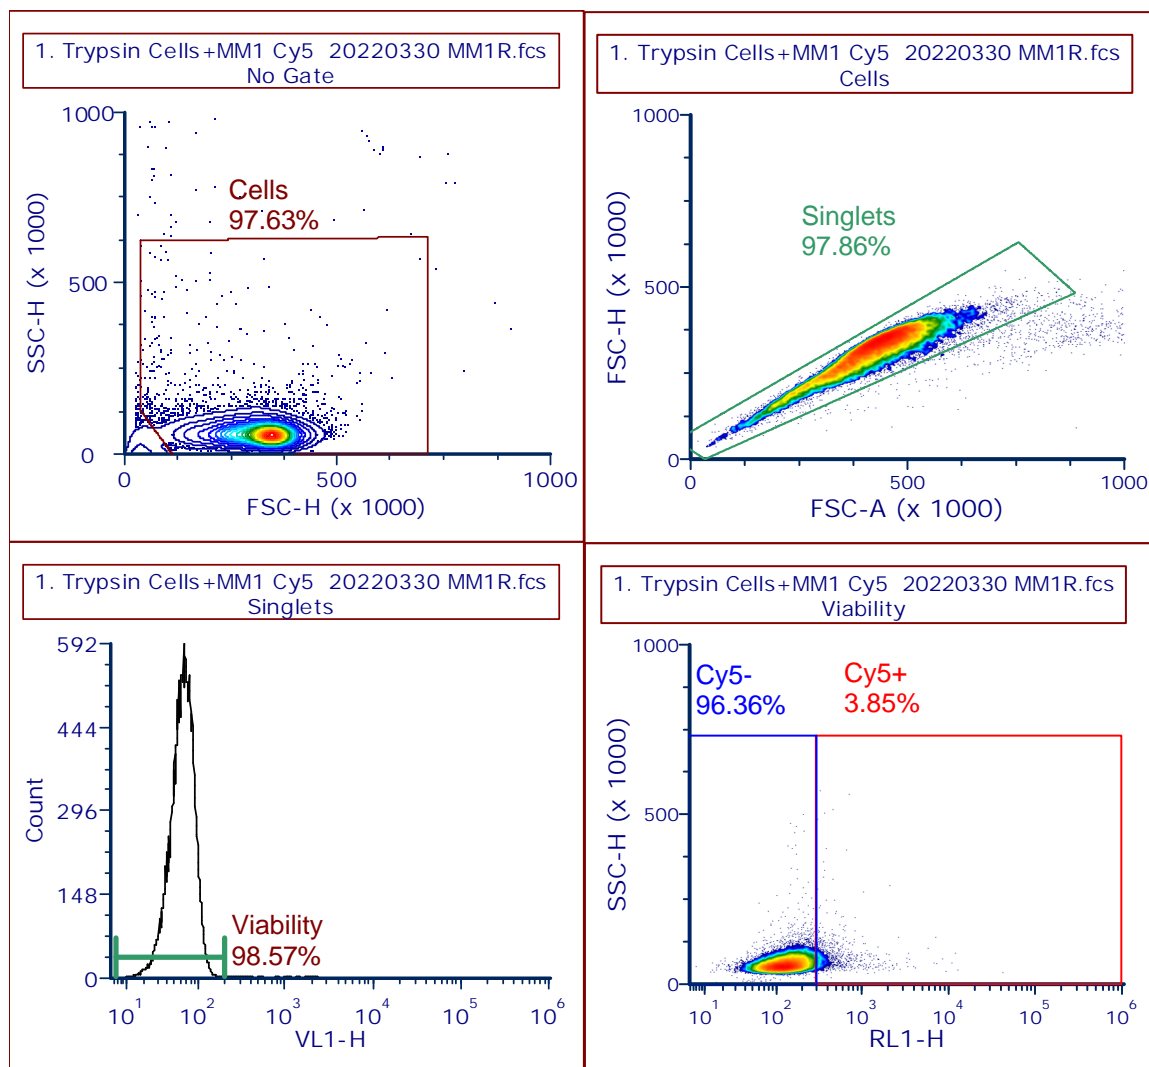

|   | A             | B          | C           | D              | E                |  |
|---|---------------|------------|-------------|----------------|------------------|--|
| 1 | Filename      | Gate       | # of Events | % of all cells | % of gated cells |  |
| 2 | 1. Trypsin Ce | All Events | 38411       | 100            | 100              |  |
| 3 | 1. Trypsin Ce | Cells      | 37501       | 97.63          | 97.63            |  |
| 4 | 1. Trypsin Ce | Singlets   | 36697       | 95.54          | 97.86            |  |
| 5 | 1. Trypsin Ce | Viability  | 36173       | 94.17          | 98.57            |  |
| 6 | 1. Trypsin Ce | Cy5+       | 1392        | 3.62           | 3.85             |  |
| 7 | 1. Trypsin Ce | Cy5-       | 34858       | 90.75          | 96.36            |  |
| 8 |               |            |             |                |                  |  |
| 9 |               |            |             |                |                  |  |

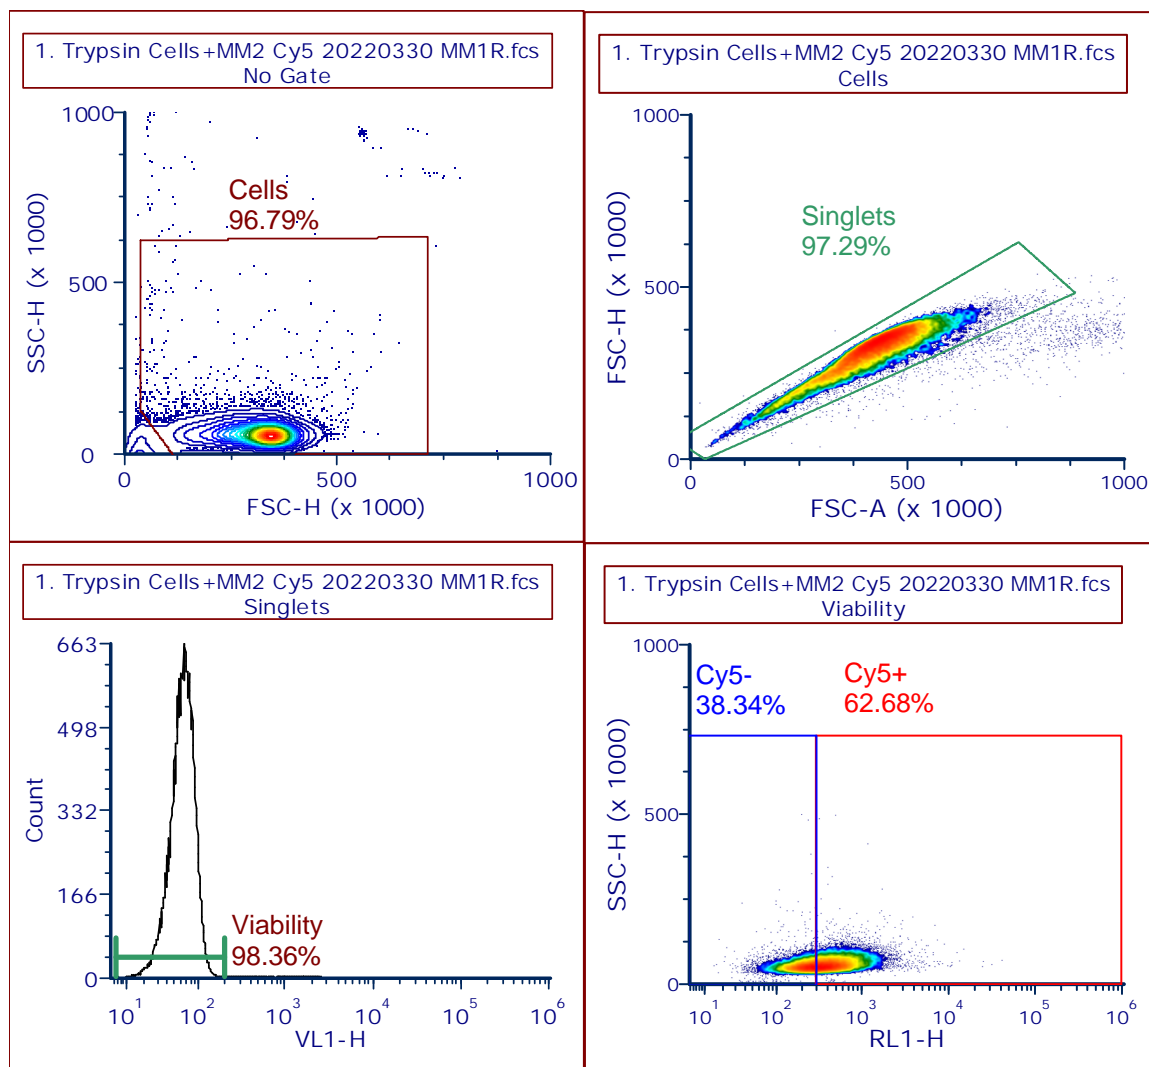

|   | A             | B          | C           | D              | E                |  |
|---|---------------|------------|-------------|----------------|------------------|--|
| 1 | Filename      | Gate       | # of Events | % of all cells | % of gated cells |  |
| 2 | 1. Trypsin Ce | All Events | 44243       | 100            | 100              |  |
| 3 | 1. Trypsin Ce | Cells      | 42825       | 96.79          | 96.79            |  |
| 4 | 1. Trypsin Ce | Singlets   | 41666       | 94.18          | 97.29            |  |
| 5 | 1. Trypsin Ce | Viability  | 40982       | 92.63          | 98.36            |  |
| 6 | 1. Trypsin Ce | Cy5+       | 25687       | 58.06          | 62.68            |  |
| 7 | 1. Trypsin Ce | Cy5-       | 15713       | 35.52          | 38.34            |  |
| 8 |               |            |             |                |                  |  |
| 9 |               |            |             |                |                  |  |

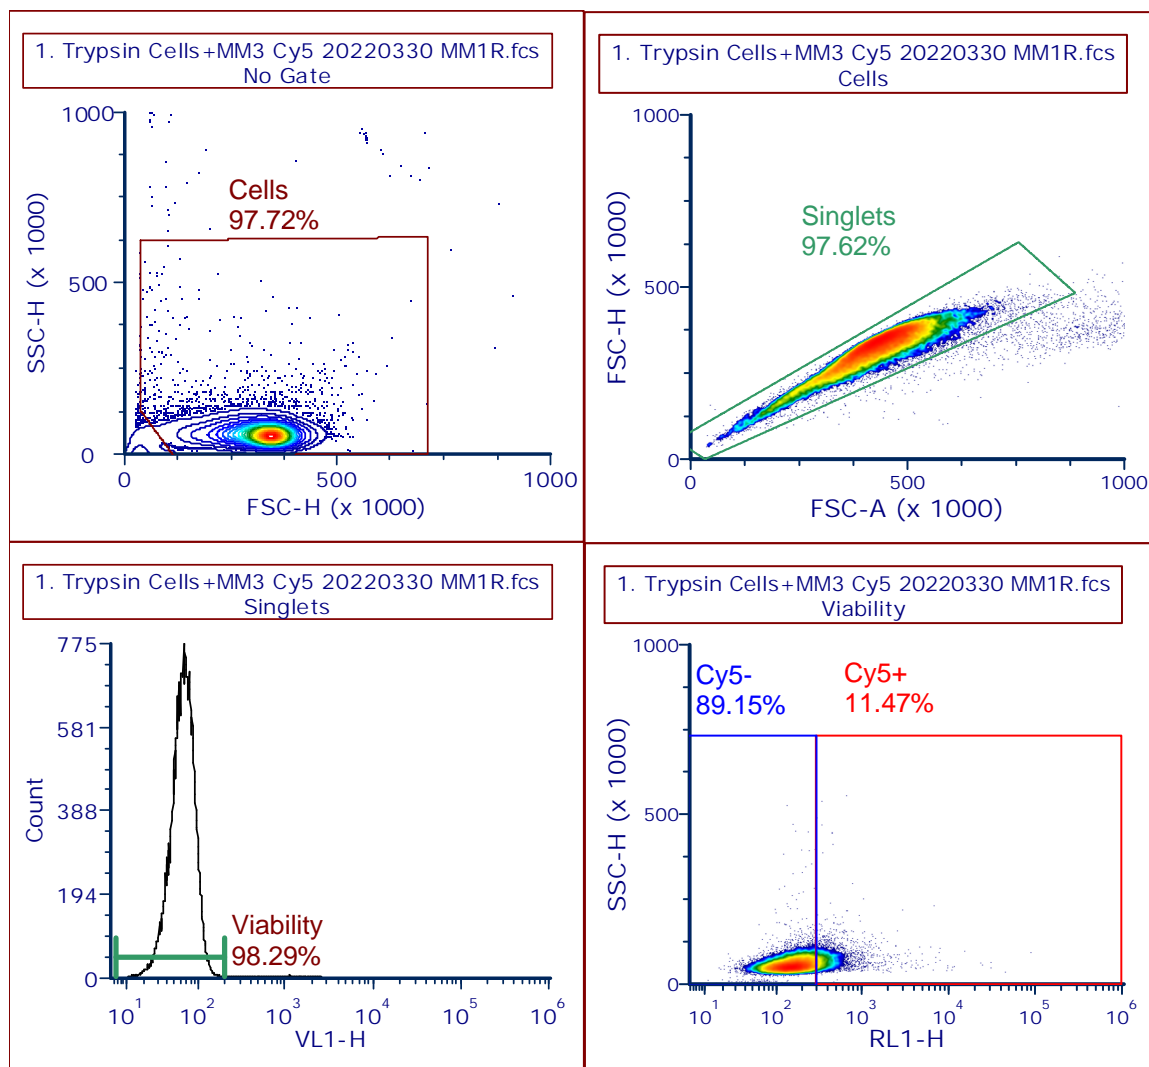

|   | A             | B          | C           | D              | E                |  |
|---|---------------|------------|-------------|----------------|------------------|--|
| 1 | Filename      | Gate       | # of Events | % of all cells | % of gated cells |  |
| 2 | 1. Trypsin Ce | All Events | 50569       | 100            | 100              |  |
| 3 | 1. Trypsin Ce | Cells      | 49414       | 97.72          | 97.72            |  |
| 4 | 1. Trypsin Ce | Singlets   | 48240       | 95.39          | 97.62            |  |
| 5 | 1. Trypsin Ce | Viability  | 47415       | 93.76          | 98.29            |  |
| 6 | 1. Trypsin Ce | Cy5+       | 5438        | 10.75          | 11.47            |  |
| 7 | 1. Trypsin Ce | Cy5-       | 42272       | 83.59          | 89.15            |  |
| 8 |               |            |             |                |                  |  |
| 9 |               |            |             |                |                  |  |

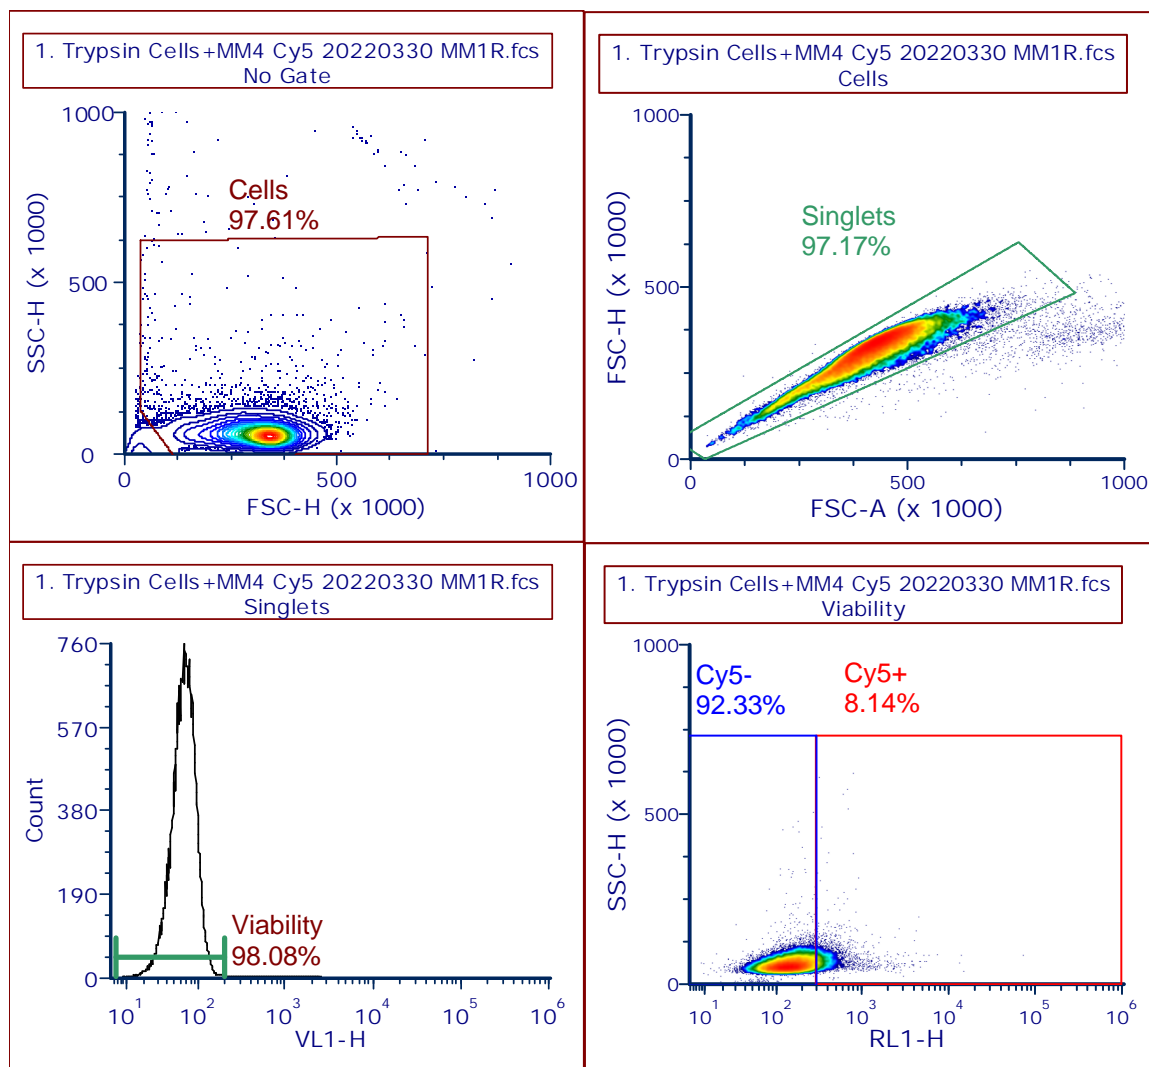

|   | A             | B          | C           | D              | E                |
|---|---------------|------------|-------------|----------------|------------------|
| 1 | Filename      | Gate       | # of Events | % of all cells | % of gated cells |
| 2 | 1. Trypsin Ce | All Events | 51278       | 100            | 100              |
| 3 | 1. Trypsin Ce | Cells      | 50050       | 97.61          | 97.61            |
| 4 | 1. Trypsin Ce | Singlets   | 48632       | 94.84          | 97.17            |
| 5 | 1. Trypsin Ce | Viability  | 47696       | 93.01          | 98.08            |
| 6 | 1. Trypsin Ce | Cy5+       | 3884        | 7.57           | 8.14             |
| 7 | 1. Trypsin Ce | Cy5-       | 44040       | 85.88          | 92.33            |
| 8 |               |            |             |                |                  |
| 9 |               |            |             |                |                  |

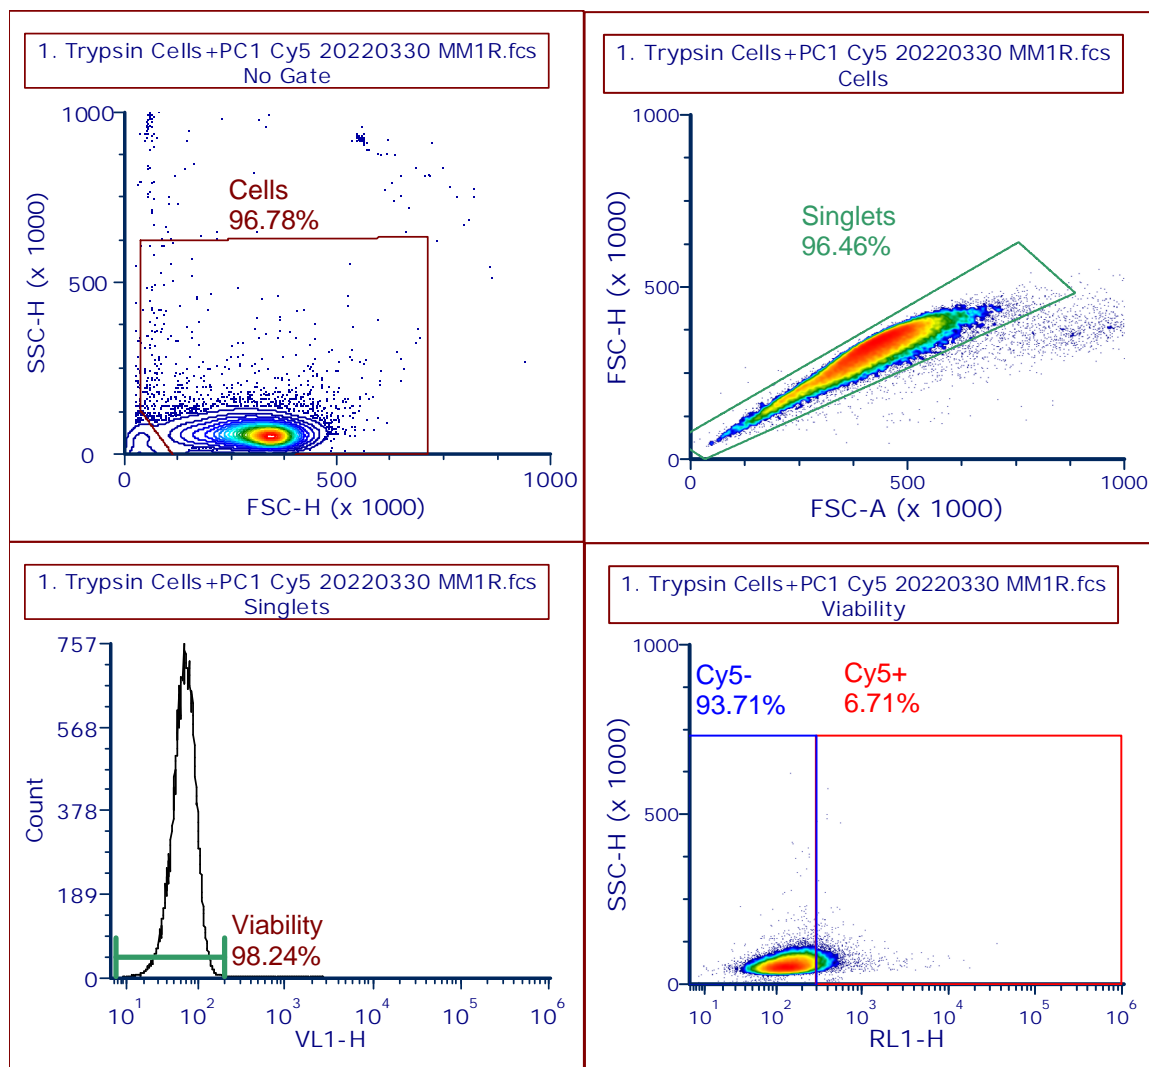

|   | A             | B          | C           | D              | E                |  |
|---|---------------|------------|-------------|----------------|------------------|--|
| 1 | Filename      | Gate       | # of Events | % of all cells | % of gated cells |  |
| 2 | 1. Trypsin Ce | All Events | 51524       | 100            | 100              |  |
| 3 | 1. Trypsin Ce | Cells      | 49867       | 96.78          | 96.78            |  |
| 4 | 1. Trypsin Ce | Singlets   | 48101       | 93.36          | 96.46            |  |
| 5 | 1. Trypsin Ce | Viability  | 47253       | 91.71          | 98.24            |  |
| 6 | 1. Trypsin Ce | Cy5+       | 3169        | 6.15           | 6.71             |  |
| 7 | 1. Trypsin Ce | Cy5-       | 44279       | 85.94          | 93.71            |  |
| 8 |               |            |             |                |                  |  |
| 9 |               |            |             |                |                  |  |

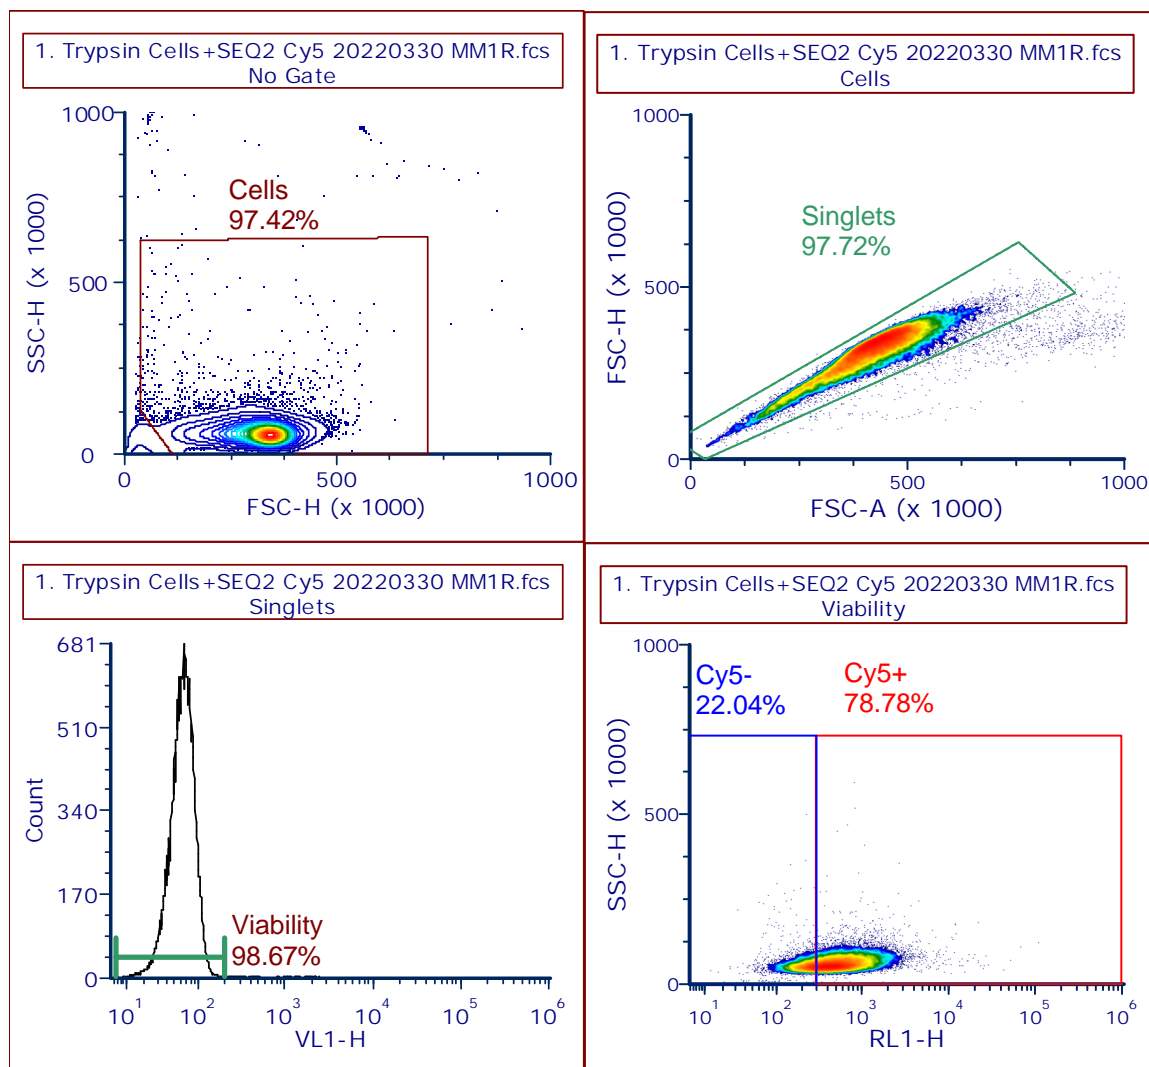

|   | A             | B          | C           | D              | E                |
|---|---------------|------------|-------------|----------------|------------------|
| 1 | Filename      | Gate       | # of Events | % of all cells | % of gated cells |
| 2 | 1. Trypsin Ce | All Events | 44077       | 100            | 100              |
| 3 | 1. Trypsin Ce | Cells      | 42940       | 97.42          | 97.42            |
| 4 | 1. Trypsin Ce | Singlets   | 41960       | 95.2           | 97.72            |
| 5 | 1. Trypsin Ce | Viability  | 41400       | 93.93          | 98.67            |
| 6 | 1. Trypsin Ce | Cy5+       | 32614       | 73.99          | 78.78            |
| 7 | 1. Trypsin Ce | Cy5-       | 9124        | 20.7           | 22.04            |
| 8 |               |            |             |                |                  |
| 9 |               |            |             |                |                  |



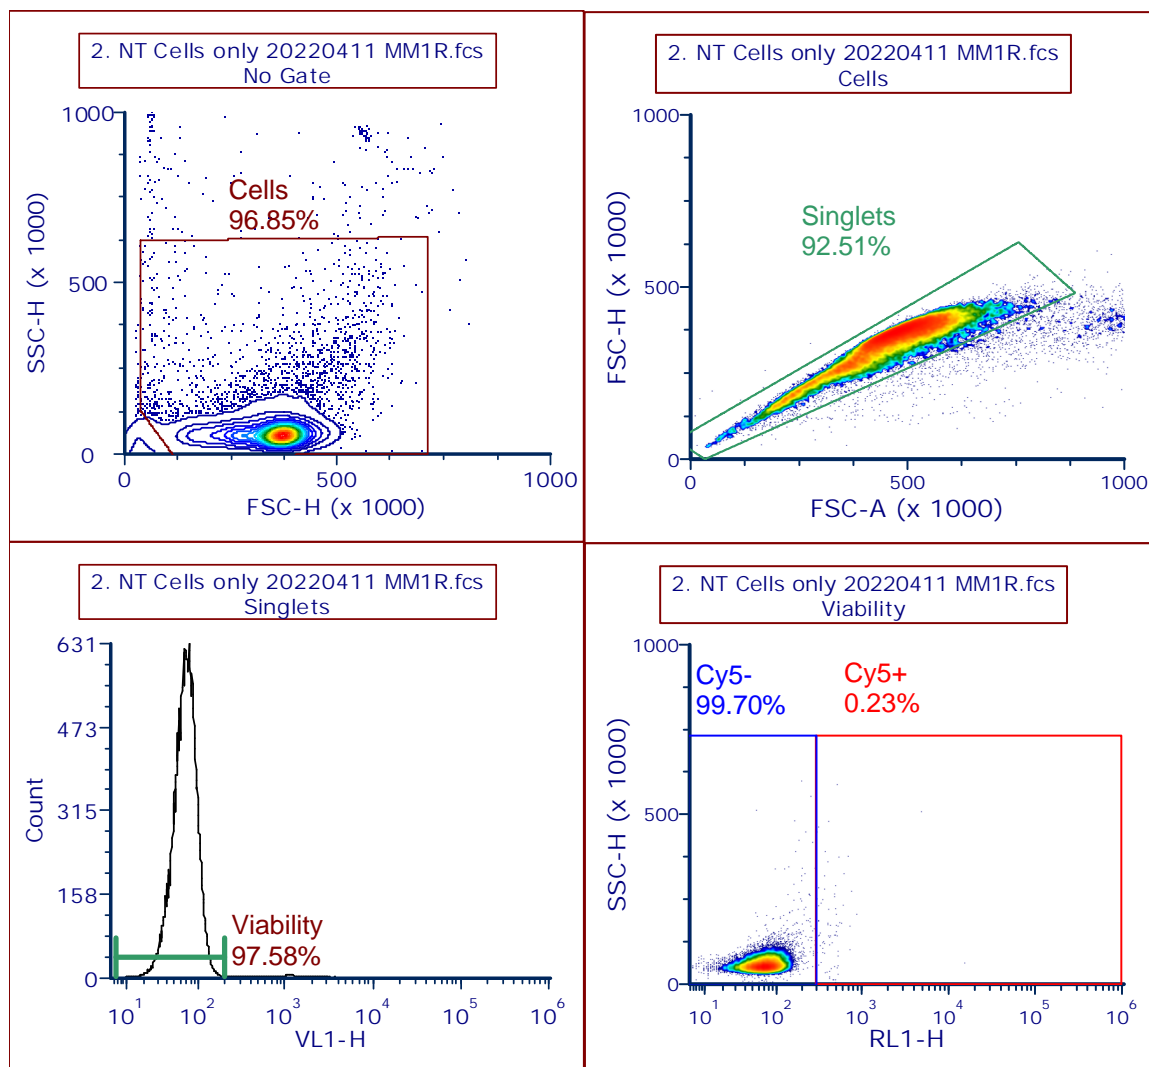

|   | A              | B          | C           | D              | E                |  |
|---|----------------|------------|-------------|----------------|------------------|--|
| 1 | Filename       | Gate       | # of Events | % of all cells | % of gated cells |  |
| 2 | 2. NT Cells on | All Events | 44534       | 100            | 100              |  |
| 3 | 2. NT Cells on | Cells      | 43131       | 96.85          | 96.85            |  |
| 4 | 2. NT Cells on | Singlets   | 39900       | 89.59          | 92.51            |  |
| 5 | 2. NT Cells on | Viability  | 38934       | 87.43          | 97.58            |  |
| 6 | 2. NT Cells on | Cy5+       | 89          | 0.2            | 0.23             |  |
| 7 | 2. NT Cells on | Cy5-       | 38819       | 87.17          | 99.7             |  |
| 8 |                |            |             |                |                  |  |
| 9 |                |            |             |                |                  |  |

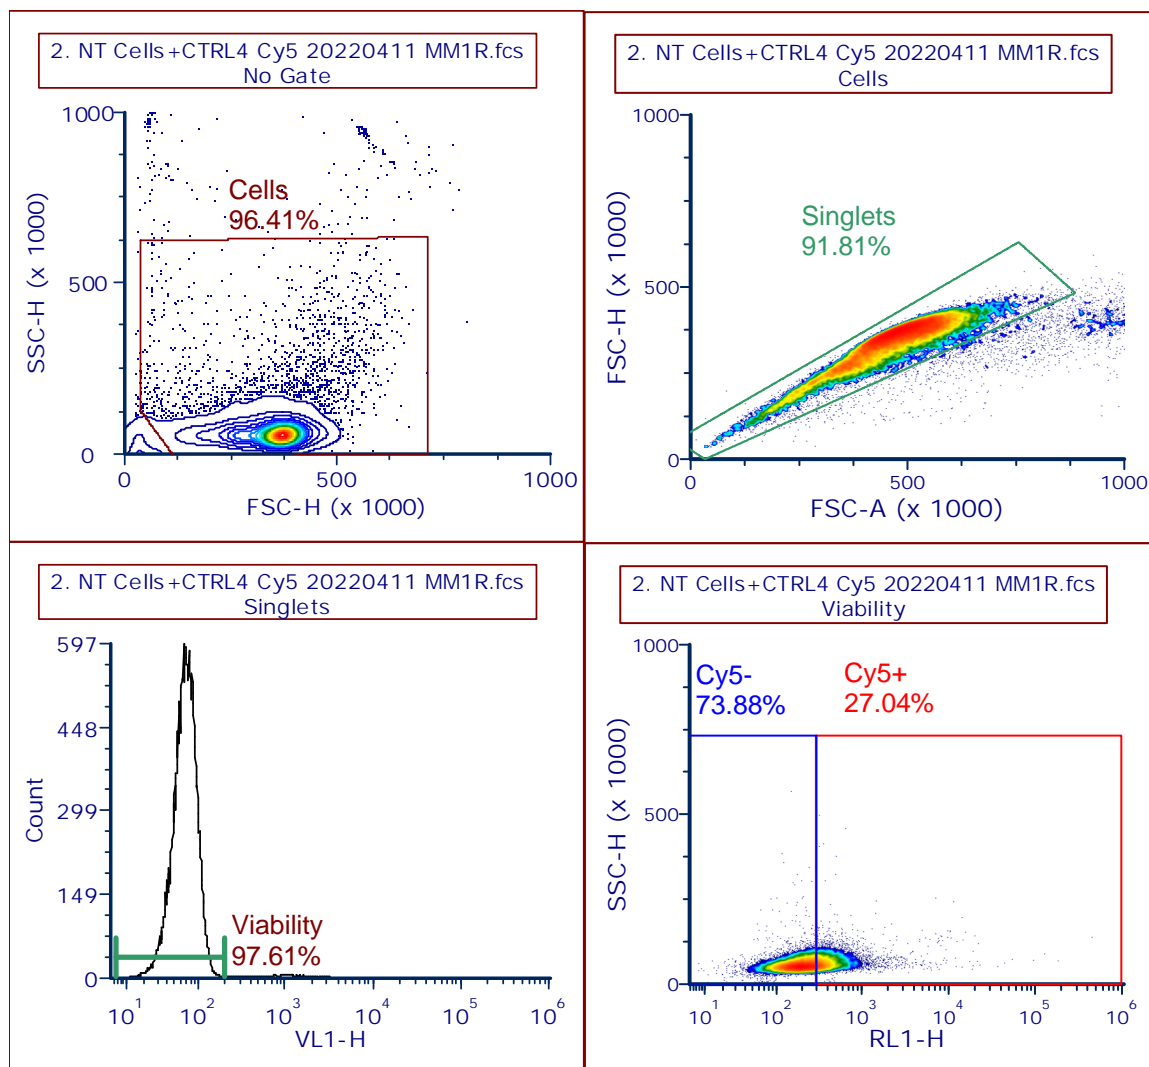

|   | A             | B          | C           | D              | E                |
|---|---------------|------------|-------------|----------------|------------------|
| 1 | Filename      | Gate       | # of Events | % of all cells | % of gated cells |
| 2 | 2. NT Cells+C | All Events | 42976       | 100            | 100              |
| 3 | 2. NT Cells+C | Cells      | 41434       | 96.41          | 96.41            |
| 4 | 2. NT Cells+C | Singlets   | 38041       | 88.52          | 91.81            |
| 5 | 2. NT Cells+C | Viability  | 37130       | 86.4           | 97.61            |
| 6 | 2. NT Cells+C | Cy5+       | 10040       | 23.36          | 27.04            |
| 7 | 2. NT Cells+C | Cy5-       | 27433       | 63.83          | 73.88            |
| 8 |               |            |             |                |                  |
| 9 |               |            |             |                |                  |

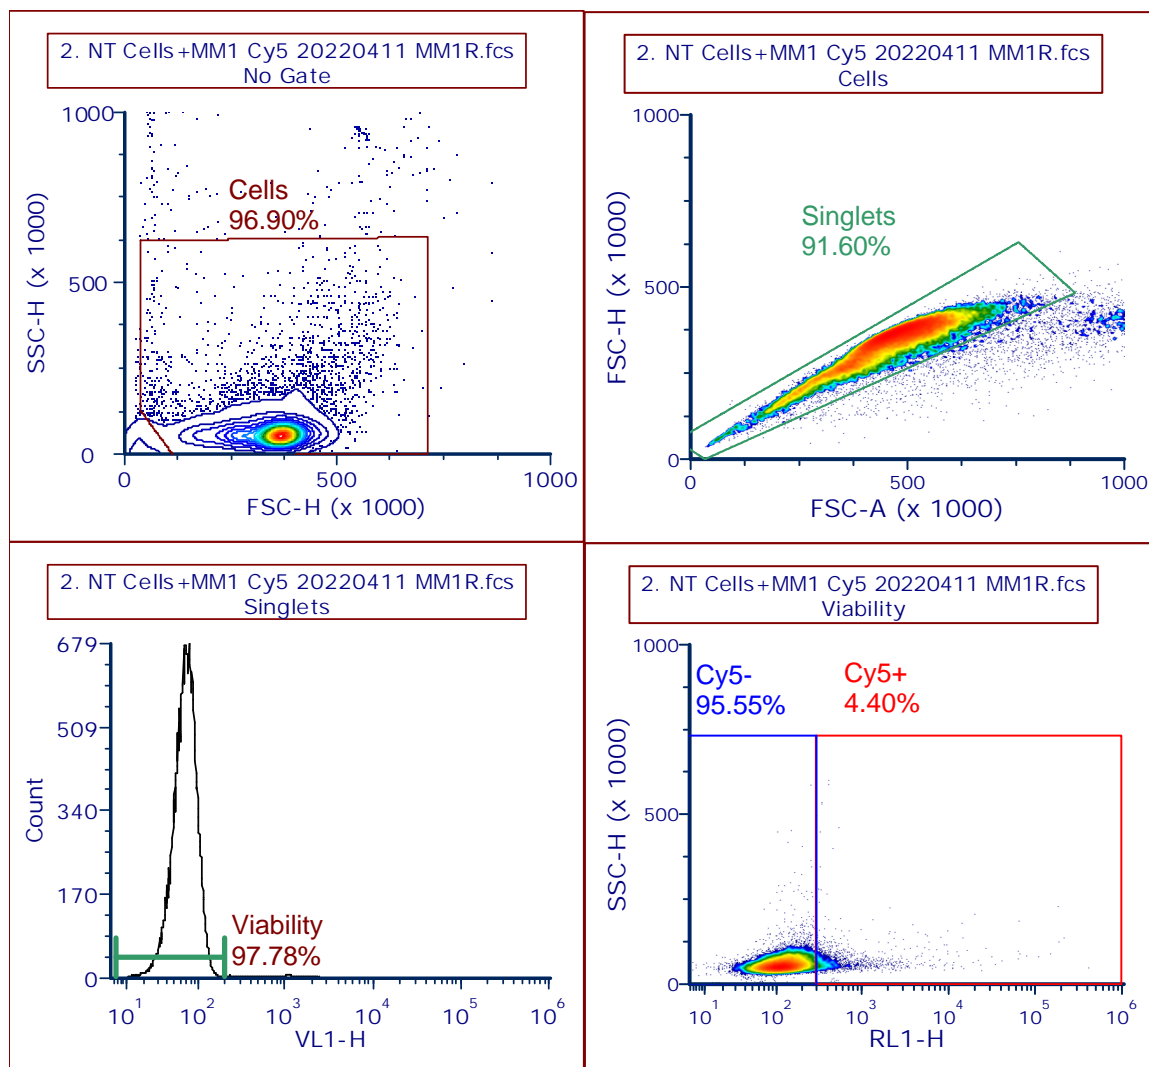

|   | A              | B          | C           | D              | E                |
|---|----------------|------------|-------------|----------------|------------------|
| 1 | Filename       | Gate       | # of Events | % of all cells | % of gated cells |
| 2 | 2. NT Cells+IV | All Events | 48474       | 100            | 100              |
| 3 | 2. NT Cells+IV | Cells      | 46972       | 96.9           | 96.9             |
| 4 | 2. NT Cells+IV | Singlets   | 43028       | 88.77          | 91.6             |
| 5 | 2. NT Cells+IV | Viability  | 42071       | 86.79          | 97.78            |
| 6 | 2. NT Cells+IV | Cy5+       | 1851        | 3.82           | 4.4              |
| 7 | 2. NT Cells+IV | Cy5-       | 40200       | 82.93          | 95.55            |
| 8 |                |            |             |                |                  |
| 9 |                |            |             |                |                  |

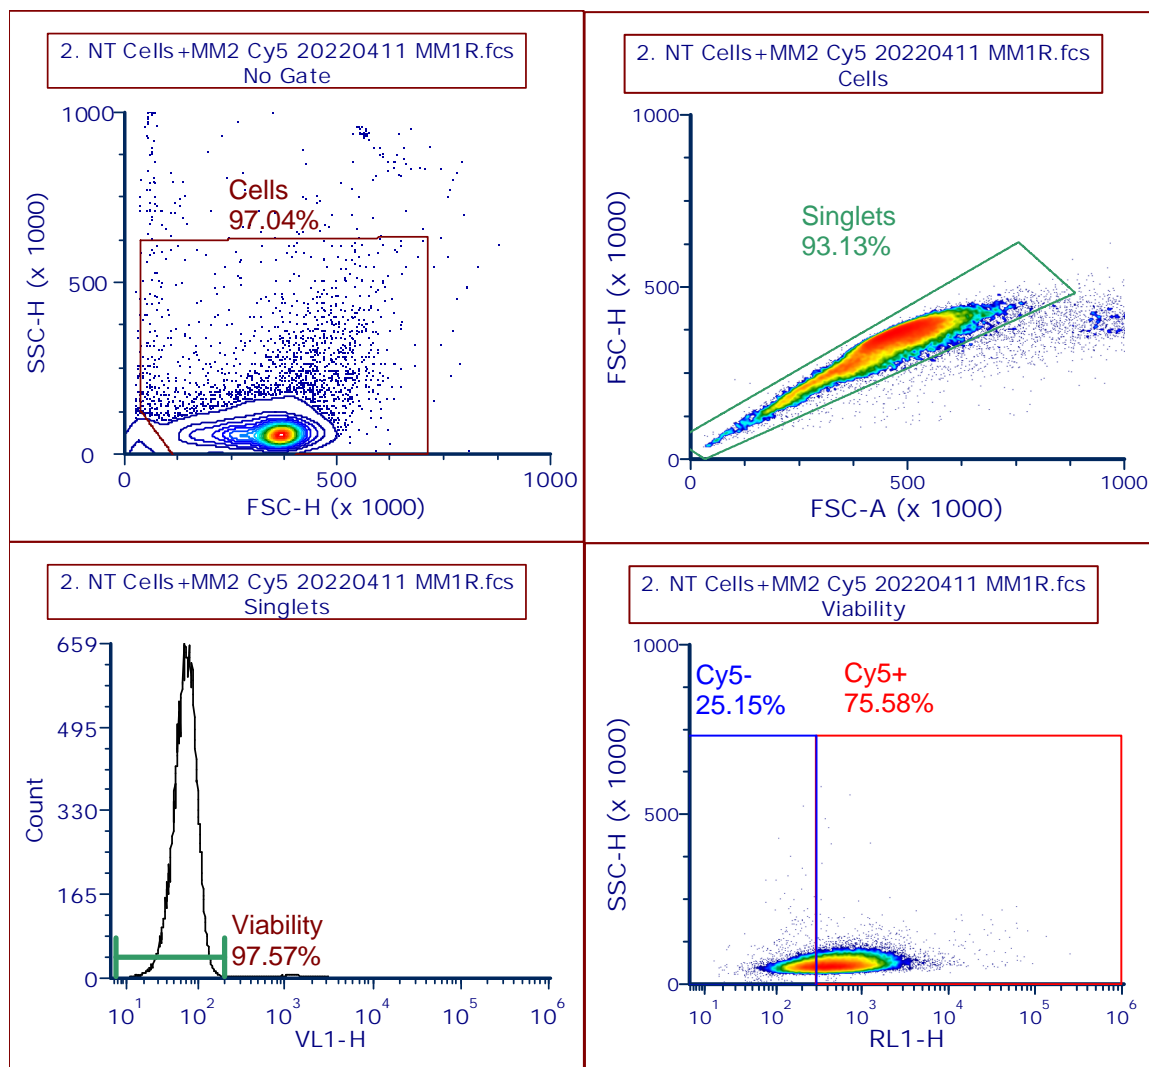

|   | A              | B          | C           | D              | E                |  |
|---|----------------|------------|-------------|----------------|------------------|--|
| 1 | Filename       | Gate       | # of Events | % of all cells | % of gated cells |  |
| 2 | 2. NT Cells+IV | All Events | 47170       | 100            | 100              |  |
| 3 | 2. NT Cells+IV | Cells      | 45775       | 97.04          | 97.04            |  |
| 4 | 2. NT Cells+IV | Singlets   | 42632       | 90.38          | 93.13            |  |
| 5 | 2. NT Cells+IV | Viability  | 41596       | 88.18          | 97.57            |  |
| 6 | 2. NT Cells+IV | Cy5+       | 31438       | 66.65          | 75.58            |  |
| 7 | 2. NT Cells+IV | Cy5-       | 10461       | 22.18          | 25.15            |  |
| 8 |                |            |             |                |                  |  |
| 9 |                |            |             |                |                  |  |

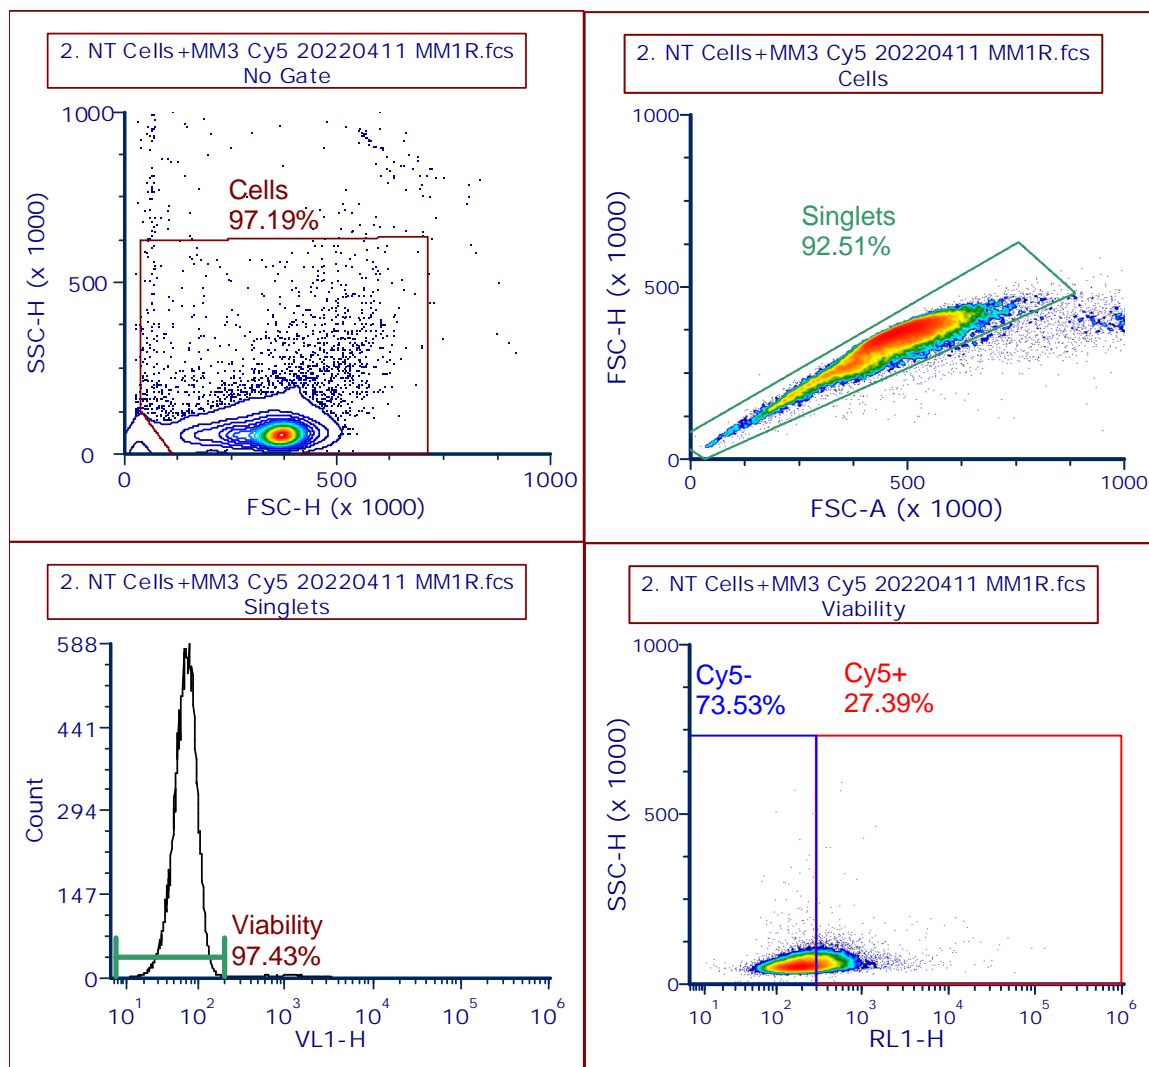

|   | A              | B          | C           | D              | E                |
|---|----------------|------------|-------------|----------------|------------------|
| 1 | Filename       | Gate       | # of Events | % of all cells | % of gated cells |
| 2 | 2. NT Cells+IV | All Events | 41598       | 100            | 100              |
| 3 | 2. NT Cells+IV | Cells      | 40431       | 97.19          | 97.19            |
| 4 | 2. NT Cells+IV | Singlets   | 37404       | 89.92          | 92.51            |
| 5 | 2. NT Cells+IV | Viability  | 36442       | 87.61          | 97.43            |
| 6 | 2. NT Cells+IV | Cy5+       | 9980        | 23.99          | 27.39            |
| 7 | 2. NT Cells+IV | Cy5-       | 26795       | 64.41          | 73.53            |
| 8 |                |            |             |                |                  |
| 9 |                |            |             |                |                  |

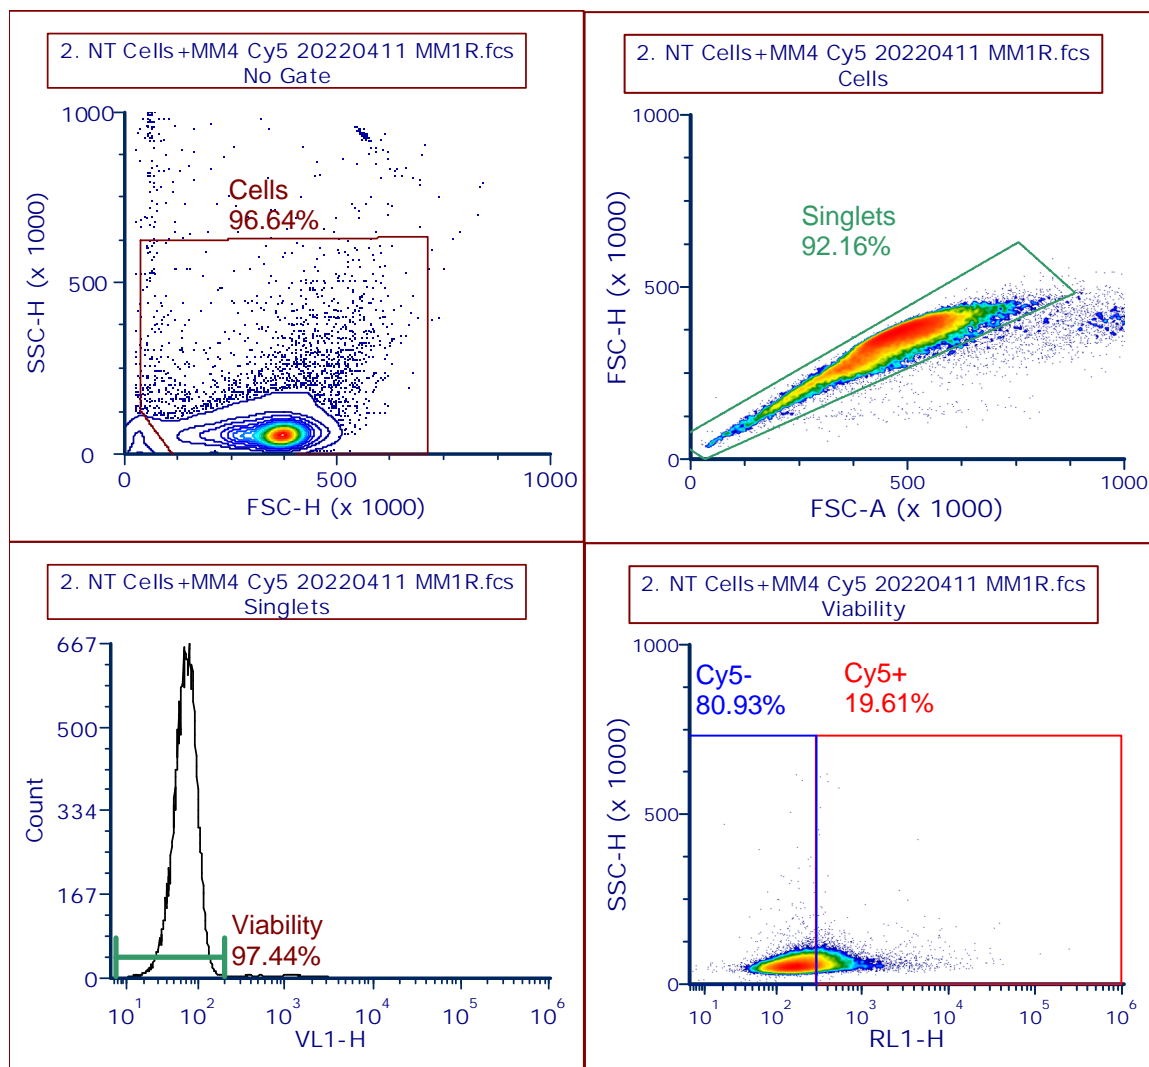

|   | A              | B          | C           | D              | E                |  |
|---|----------------|------------|-------------|----------------|------------------|--|
| 1 | Filename       | Gate       | # of Events | % of all cells | % of gated cells |  |
| 2 | 2. NT Cells+IV | All Events | 48502       | 100            | 100              |  |
| 3 | 2. NT Cells+IV | Cells      | 46874       | 96.64          | 96.64            |  |
| 4 | 2. NT Cells+IV | Singlets   | 43201       | 89.07          | 92.16            |  |
| 5 | 2. NT Cells+IV | Viability  | 42097       | 86.79          | 97.44            |  |
| 6 | 2. NT Cells+IV | Cy5+       | 8257        | 17.02          | 19.61            |  |
| 7 | 2. NT Cells+IV | Cy5-       | 34067       | 70.24          | 80.93            |  |
| 8 |                |            |             |                |                  |  |
| 9 |                |            |             |                |                  |  |

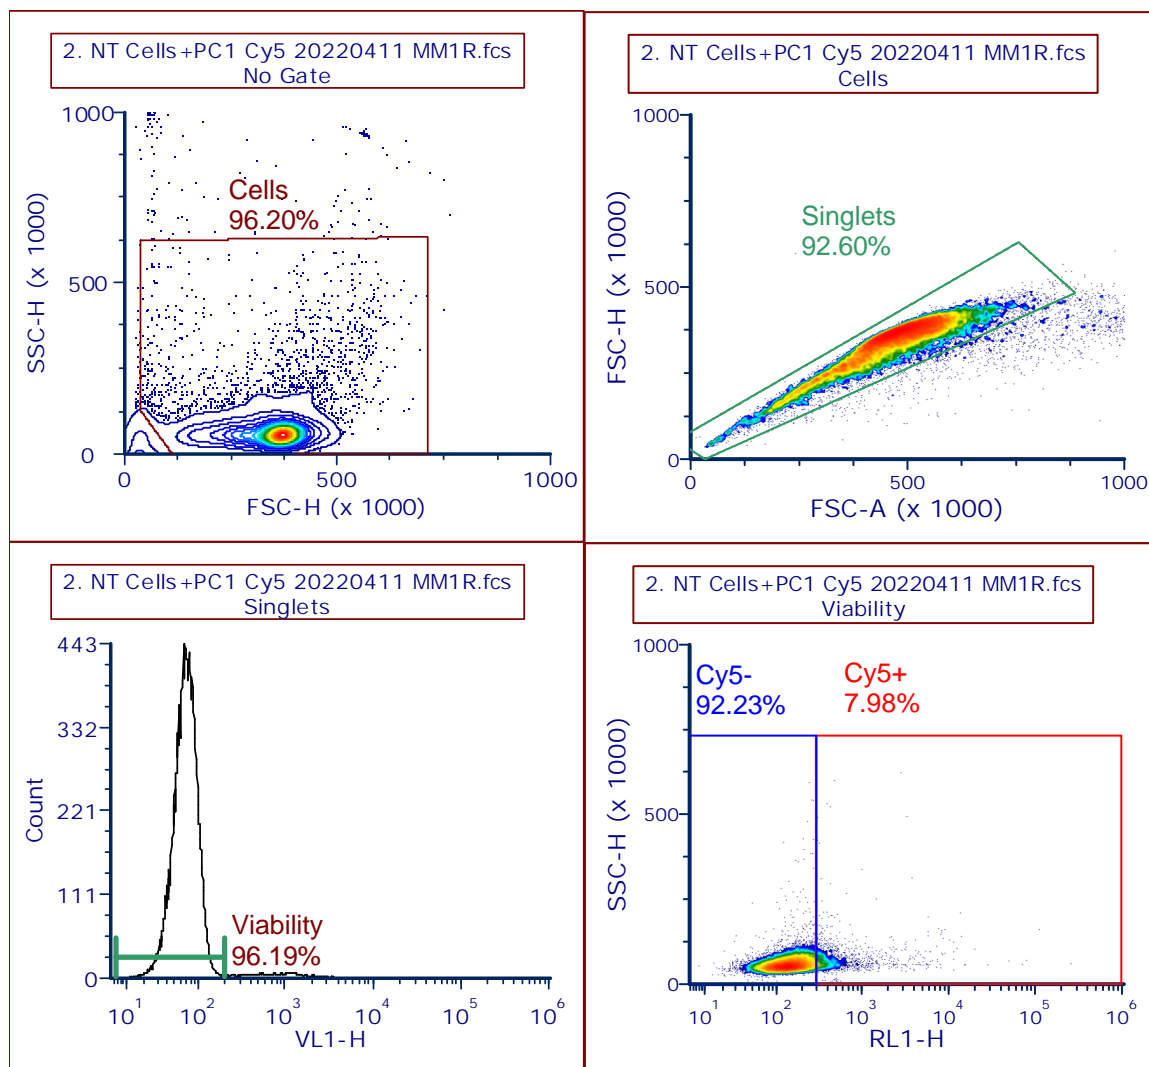

|   | A               | B          | C           | D              | E                |
|---|-----------------|------------|-------------|----------------|------------------|
| 1 | Filename        | Gate       | # of Events | % of all cells | % of gated cells |
| 2 | 2. NT Cells+PC1 | All Events | 32330       | 100            | 100              |
| 3 | 2. NT Cells+PC1 | Cells      | 31103       | 96.2           | 96.2             |
| 4 | 2. NT Cells+PC1 | Singlets   | 28801       | 89.08          | 92.6             |
| 5 | 2. NT Cells+PC1 | Viability  | 27705       | 85.69          | 96.19            |
| 6 | 2. NT Cells+PC1 | Cy5+       | 2212        | 6.84           | 7.98             |
| 7 | 2. NT Cells+PC1 | Cy5-       | 25553       | 79.04          | 92.23            |
| 8 |                 |            |             |                |                  |
| 9 |                 |            |             |                |                  |

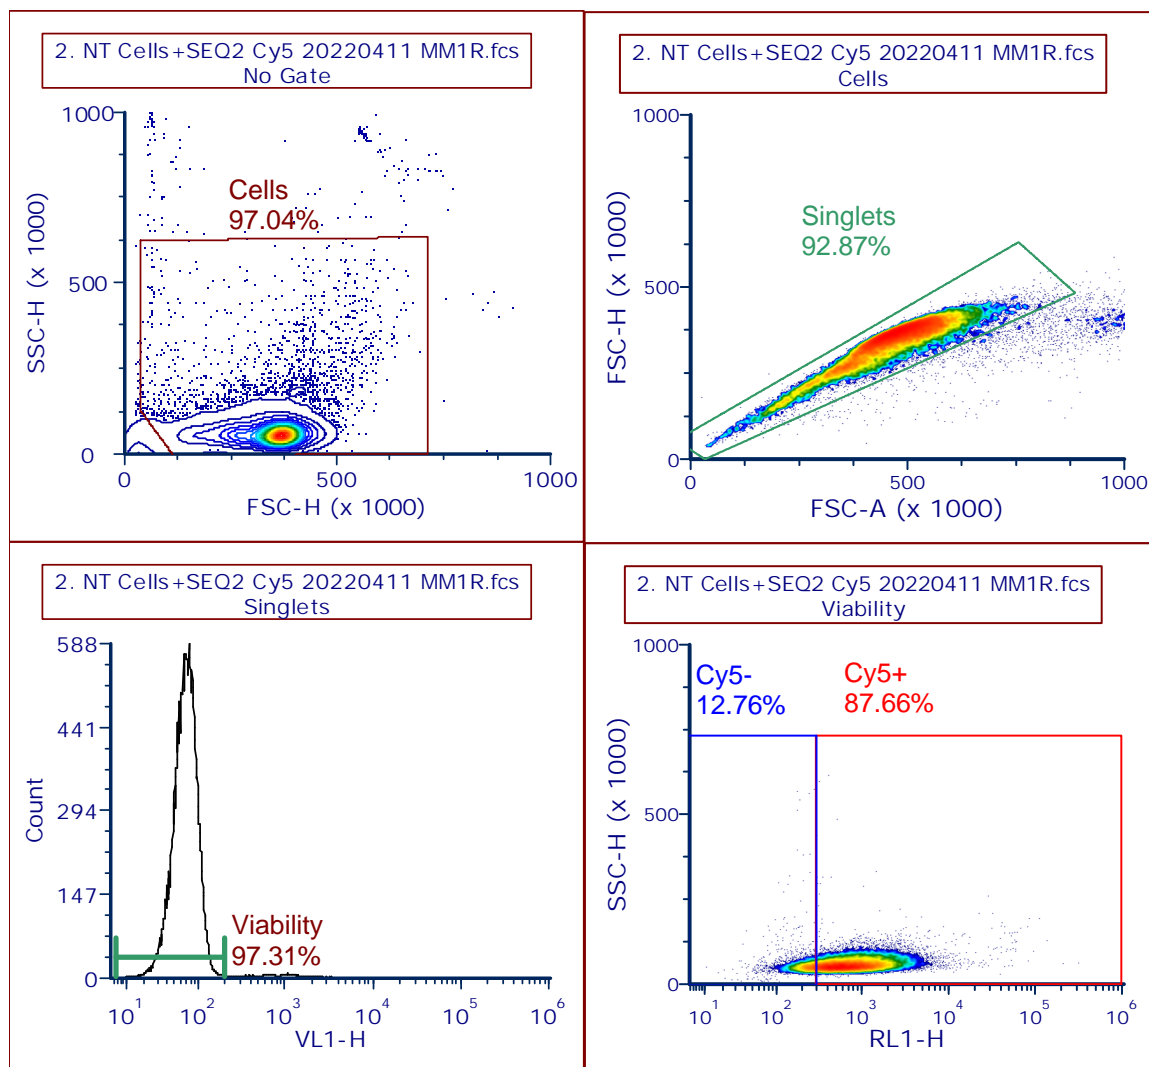

|   | A             | B          | C           | D              | E                |  |
|---|---------------|------------|-------------|----------------|------------------|--|
| 1 | Filename      | Gate       | # of Events | % of all cells | % of gated cells |  |
| 2 | 2. NT Cells+S | All Events | 42061       | 100            | 100              |  |
| 3 | 2. NT Cells+S | Cells      | 40818       | 97.04          | 97.04            |  |
| 4 | 2. NT Cells+S | Singlets   | 37908       | 90.13          | 92.87            |  |
| 5 | 2. NT Cells+S | Viability  | 36888       | 87.7           | 97.31            |  |
| 6 | 2. NT Cells+S | Cy5+       | 32335       | 76.88          | 87.66            |  |
| 7 | 2. NT Cells+S | Cy5-       | 4708        | 11.19          | 12.76            |  |
| 8 |               |            |             |                |                  |  |
| 9 |               |            |             |                |                  |  |



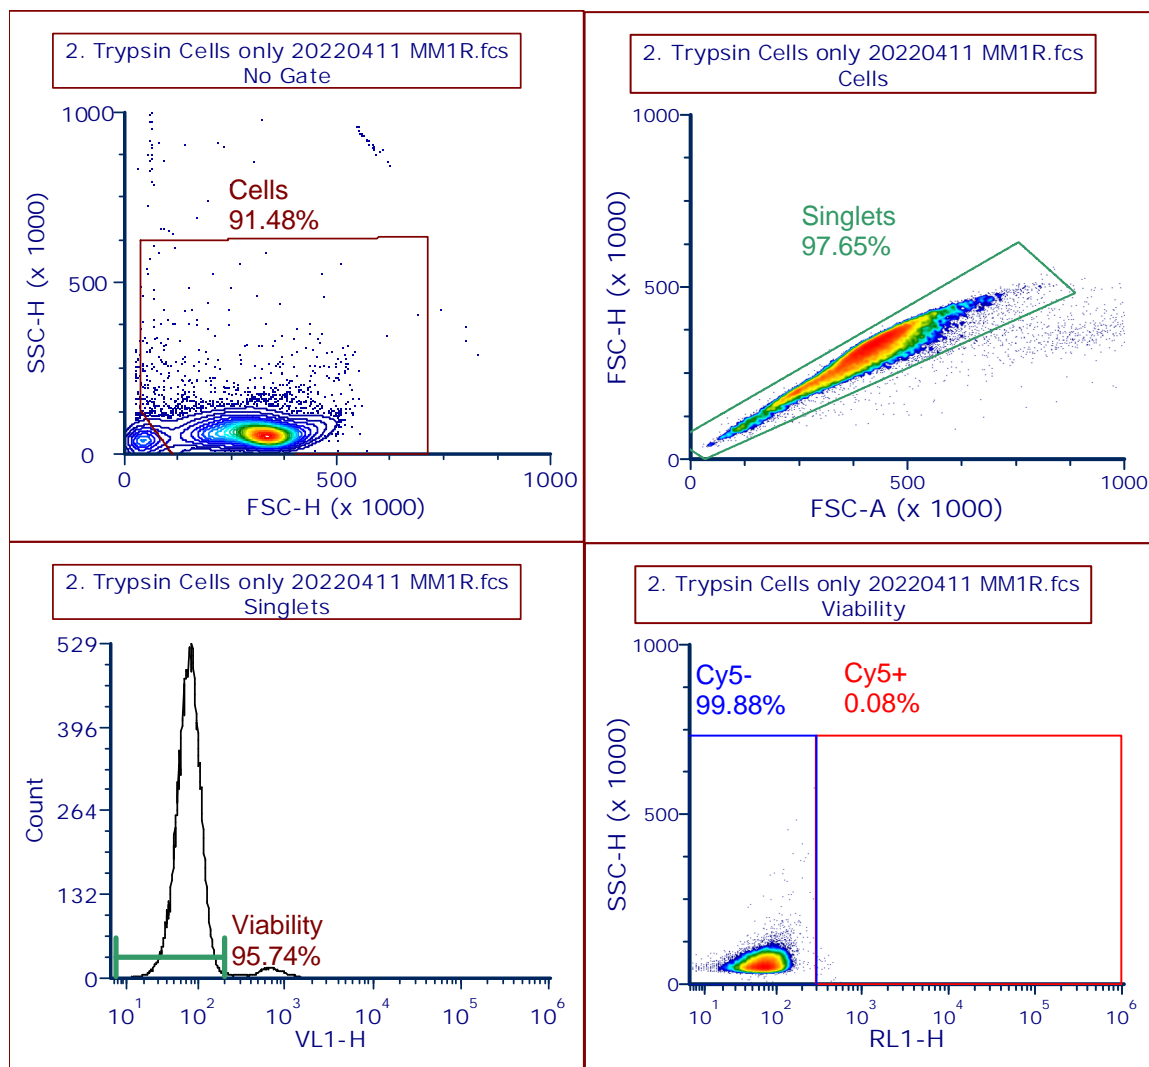

|   | A             | B          | C           | D              | E                |
|---|---------------|------------|-------------|----------------|------------------|
| 1 | Filename      | Gate       | # of Events | % of all cells | % of gated cells |
| 2 | 2. Trypsin Ce | All Events | 39465       | 100            | 100              |
| 3 | 2. Trypsin Ce | Cells      | 36104       | 91.48          | 91.48            |
| 4 | 2. Trypsin Ce | Singlets   | 35257       | 89.34          | 97.65            |
| 5 | 2. Trypsin Ce | Viability  | 33756       | 85.53          | 95.74            |
| 6 | 2. Trypsin Ce | Cy5+       | 27          | 0.07           | 0.08             |
| 7 | 2. Trypsin Ce | Cy5-       | 33716       | 85.43          | 99.88            |
| 8 |               |            |             |                |                  |
| 9 |               |            |             |                |                  |

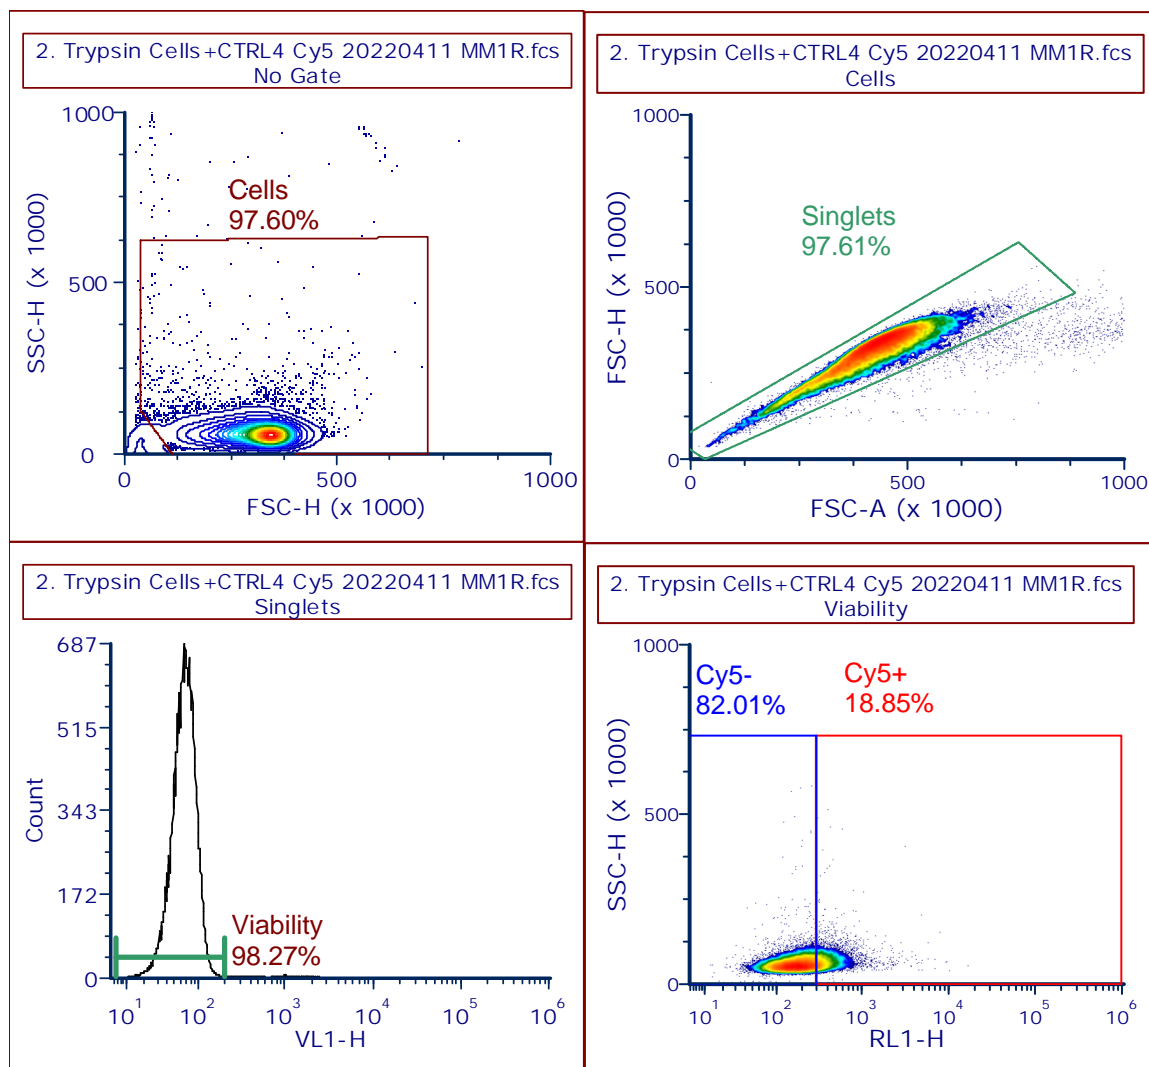

|   | A             | B          | C           | D              | E                |  |
|---|---------------|------------|-------------|----------------|------------------|--|
| 1 | Filename      | Gate       | # of Events | % of all cells | % of gated cells |  |
| 2 | 2. Trypsin Ce | All Events | 45392       | 100            | 100              |  |
| 3 | 2. Trypsin Ce | Cells      | 44303       | 97.6           | 97.6             |  |
| 4 | 2. Trypsin Ce | Singlets   | 43246       | 95.27          | 97.61            |  |
| 5 | 2. Trypsin Ce | Viability  | 42496       | 93.62          | 98.27            |  |
| 6 | 2. Trypsin Ce | Cy5+       | 8011        | 17.65          | 18.85            |  |
| 7 | 2. Trypsin Ce | Cy5-       | 34850       | 76.78          | 82.01            |  |
| 8 |               |            |             |                |                  |  |
| 9 |               |            |             |                |                  |  |

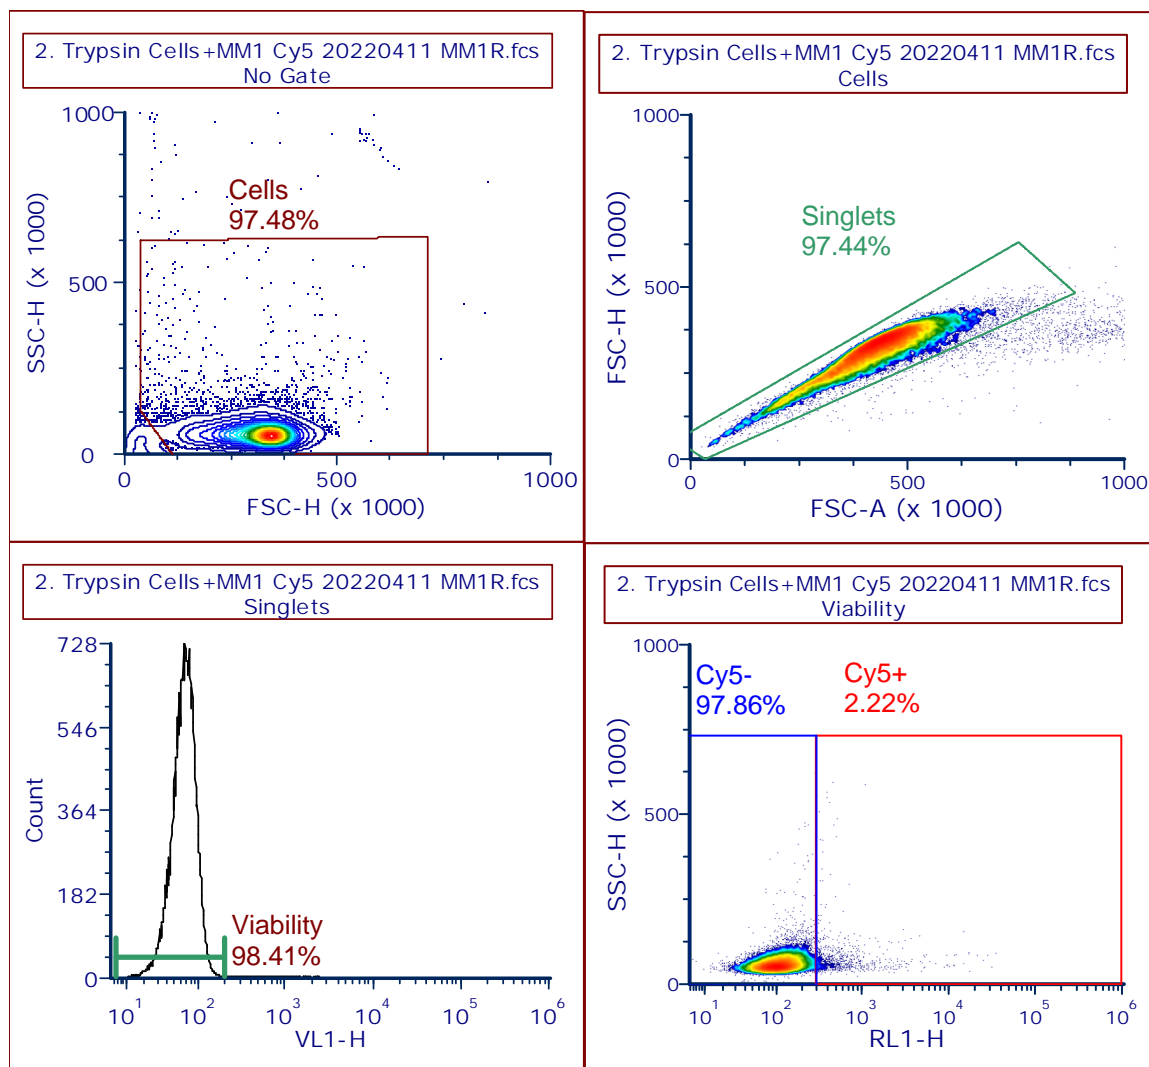

|   | A             | B          | C           | D              | E                |  |
|---|---------------|------------|-------------|----------------|------------------|--|
| 1 | Filename      | Gate       | # of Events | % of all cells | % of gated cells |  |
| 2 | 2. Trypsin Ce | All Events | 48270       | 100            | 100              |  |
| 3 | 2. Trypsin Ce | Cells      | 47054       | 97.48          | 97.48            |  |
| 4 | 2. Trypsin Ce | Singlets   | 45851       | 94.99          | 97.44            |  |
| 5 | 2. Trypsin Ce | Viability  | 45120       | 93.47          | 98.41            |  |
| 6 | 2. Trypsin Ce | Cy5+       | 1000        | 2.07           | 2.22             |  |
| 7 | 2. Trypsin Ce | Cy5-       | 44156       | 91.48          | 97.86            |  |
| 8 |               |            |             |                |                  |  |
| 9 |               |            |             |                |                  |  |

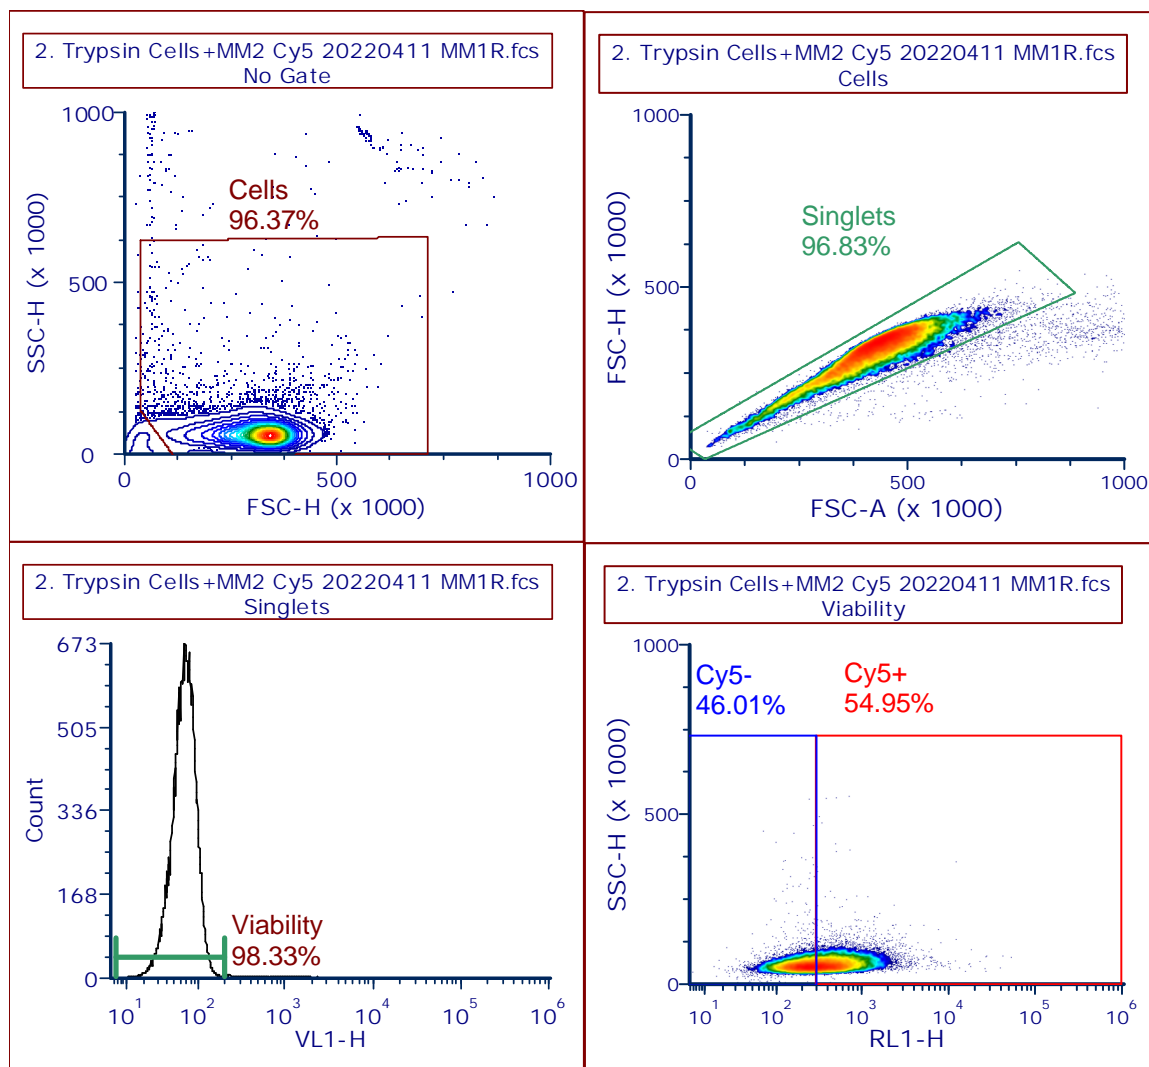

|   | A             | B          | C           | D              | E                |  |
|---|---------------|------------|-------------|----------------|------------------|--|
| 1 | Filename      | Gate       | # of Events | % of all cells | % of gated cells |  |
| 2 | 2. Trypsin Ce | All Events | 45906       | 100            | 100              |  |
| 3 | 2. Trypsin Ce | Cells      | 44240       | 96.37          | 96.37            |  |
| 4 | 2. Trypsin Ce | Singlets   | 42836       | 93.31          | 96.83            |  |
| 5 | 2. Trypsin Ce | Viability  | 42121       | 91.75          | 98.33            |  |
| 6 | 2. Trypsin Ce | Cy5+       | 23146       | 50.42          | 54.95            |  |
| 7 | 2. Trypsin Ce | Cy5-       | 19381       | 42.22          | 46.01            |  |
| 8 |               |            |             |                |                  |  |
| 9 |               |            |             |                |                  |  |

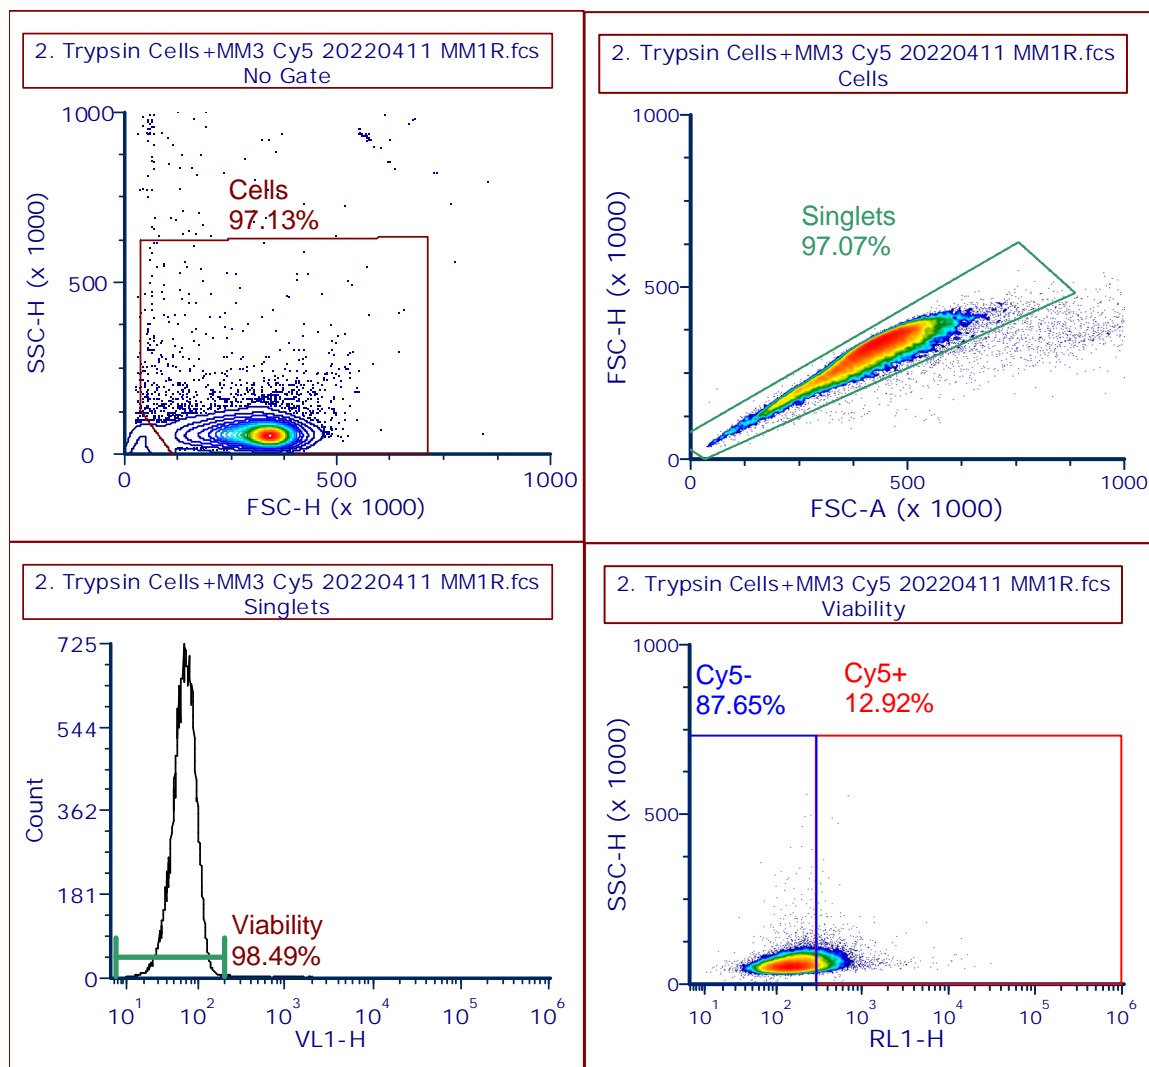

|   | A             | B          | C           | D              | E                |  |
|---|---------------|------------|-------------|----------------|------------------|--|
| 1 | Filename      | Gate       | # of Events | % of all cells | % of gated cells |  |
| 2 | 2. Trypsin Ce | All Events | 49044       | 100            | 100              |  |
| 3 | 2. Trypsin Ce | Cells      | 47638       | 97.13          | 97.13            |  |
| 4 | 2. Trypsin Ce | Singlets   | 46240       | 94.28          | 97.07            |  |
| 5 | 2. Trypsin Ce | Viability  | 45540       | 92.86          | 98.49            |  |
| 6 | 2. Trypsin Ce | Cy5+       | 5885        | 12             | 12.92            |  |
| 7 | 2. Trypsin Ce | Cy5-       | 39917       | 81.39          | 87.65            |  |
| 8 |               |            |             |                |                  |  |
| 9 |               |            |             |                |                  |  |

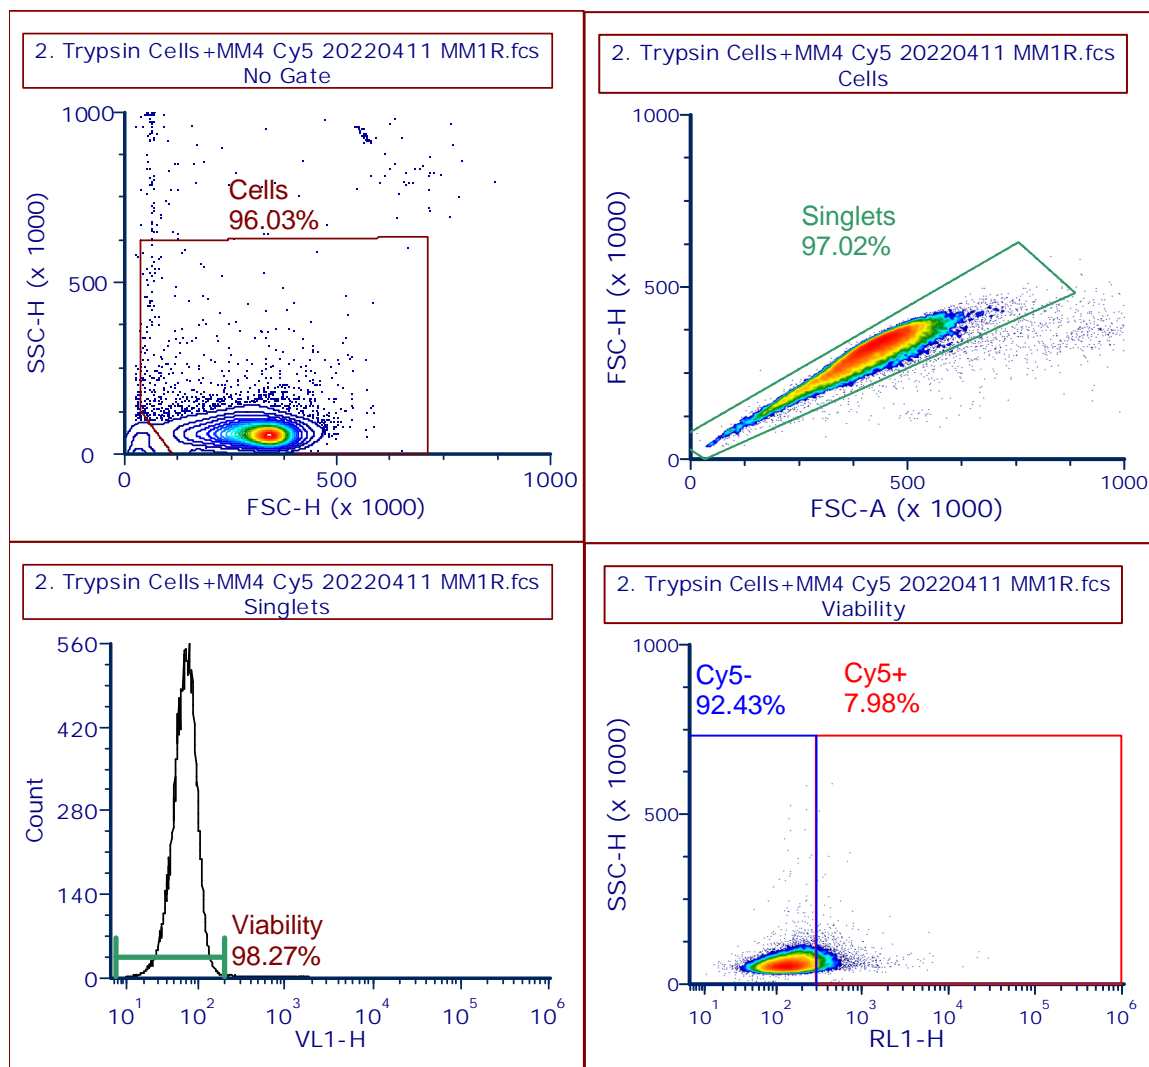

|   | A             | B          | C           | D              | E                |
|---|---------------|------------|-------------|----------------|------------------|
| 1 | Filename      | Gate       | # of Events | % of all cells | % of gated cells |
| 2 | 2. Trypsin Ce | All Events | 39071       | 100            | 100              |
| 3 | 2. Trypsin Ce | Cells      | 37520       | 96.03          | 96.03            |
| 4 | 2. Trypsin Ce | Singlets   | 36402       | 93.17          | 97.02            |
| 5 | 2. Trypsin Ce | Viability  | 35773       | 91.56          | 98.27            |
| 6 | 2. Trypsin Ce | Cy5+       | 2856        | 7.31           | 7.98             |
| 7 | 2. Trypsin Ce | Cy5-       | 33066       | 84.63          | 92.43            |
| 8 |               |            |             |                |                  |
| 9 |               |            |             |                |                  |

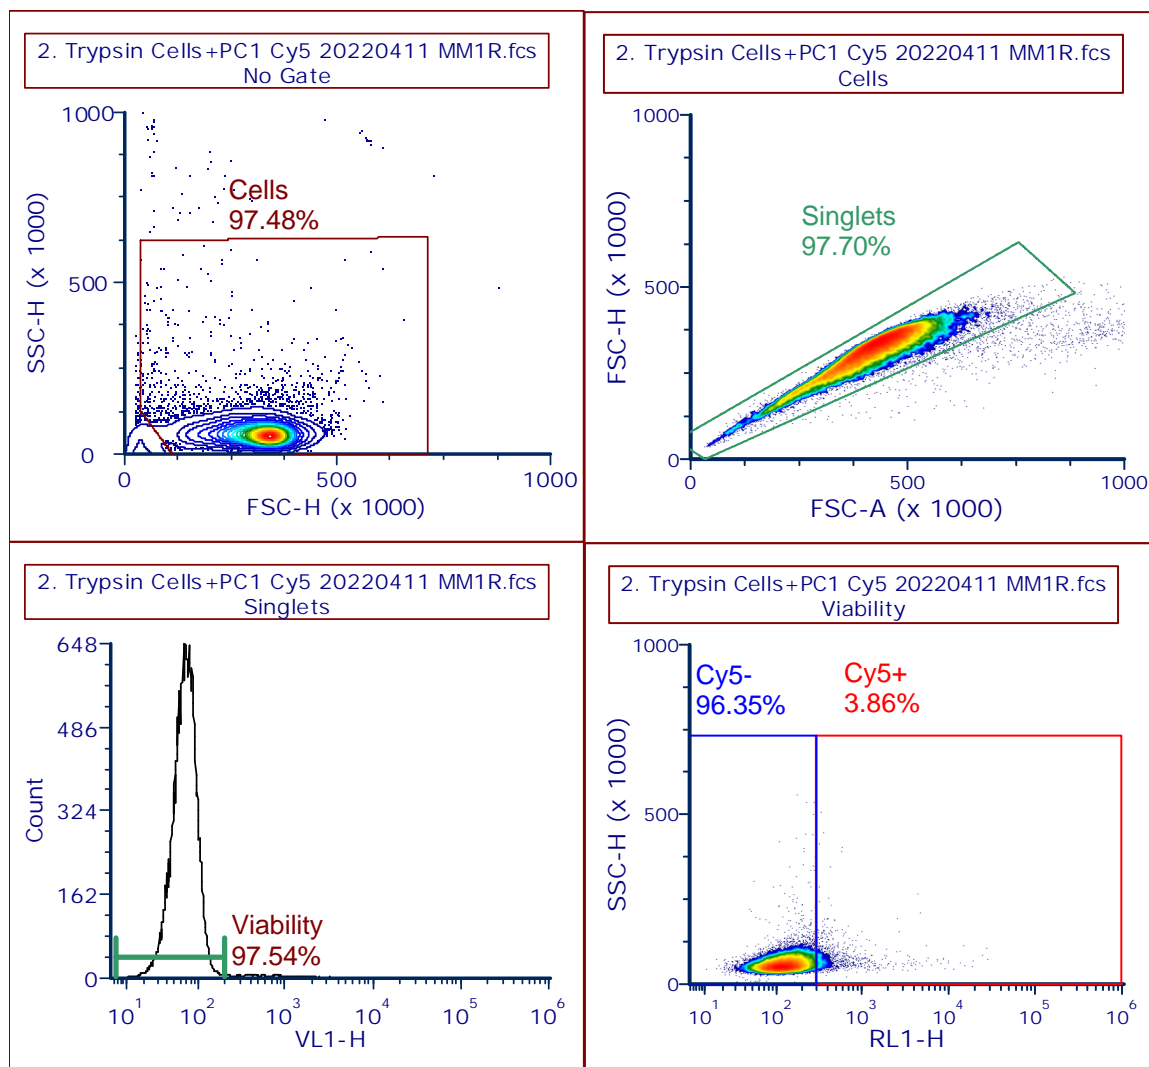

|   | A             | B          | C           | D              | E                |
|---|---------------|------------|-------------|----------------|------------------|
| 1 | Filename      | Gate       | # of Events | % of all cells | % of gated cells |
| 2 | 2. Trypsin Ce | All Events | 44377       | 100            | 100              |
| 3 | 2. Trypsin Ce | Cells      | 43258       | 97.48          | 97.48            |
| 4 | 2. Trypsin Ce | Singlets   | 42265       | 95.24          | 97.7             |
| 5 | 2. Trypsin Ce | Viability  | 41224       | 92.89          | 97.54            |
| 6 | 2. Trypsin Ce | Cy5+       | 1593        | 3.59           | 3.86             |
| 7 | 2. Trypsin Ce | Cy5-       | 39718       | 89.5           | 96.35            |
| 8 |               |            |             |                |                  |
| 9 |               |            |             |                |                  |

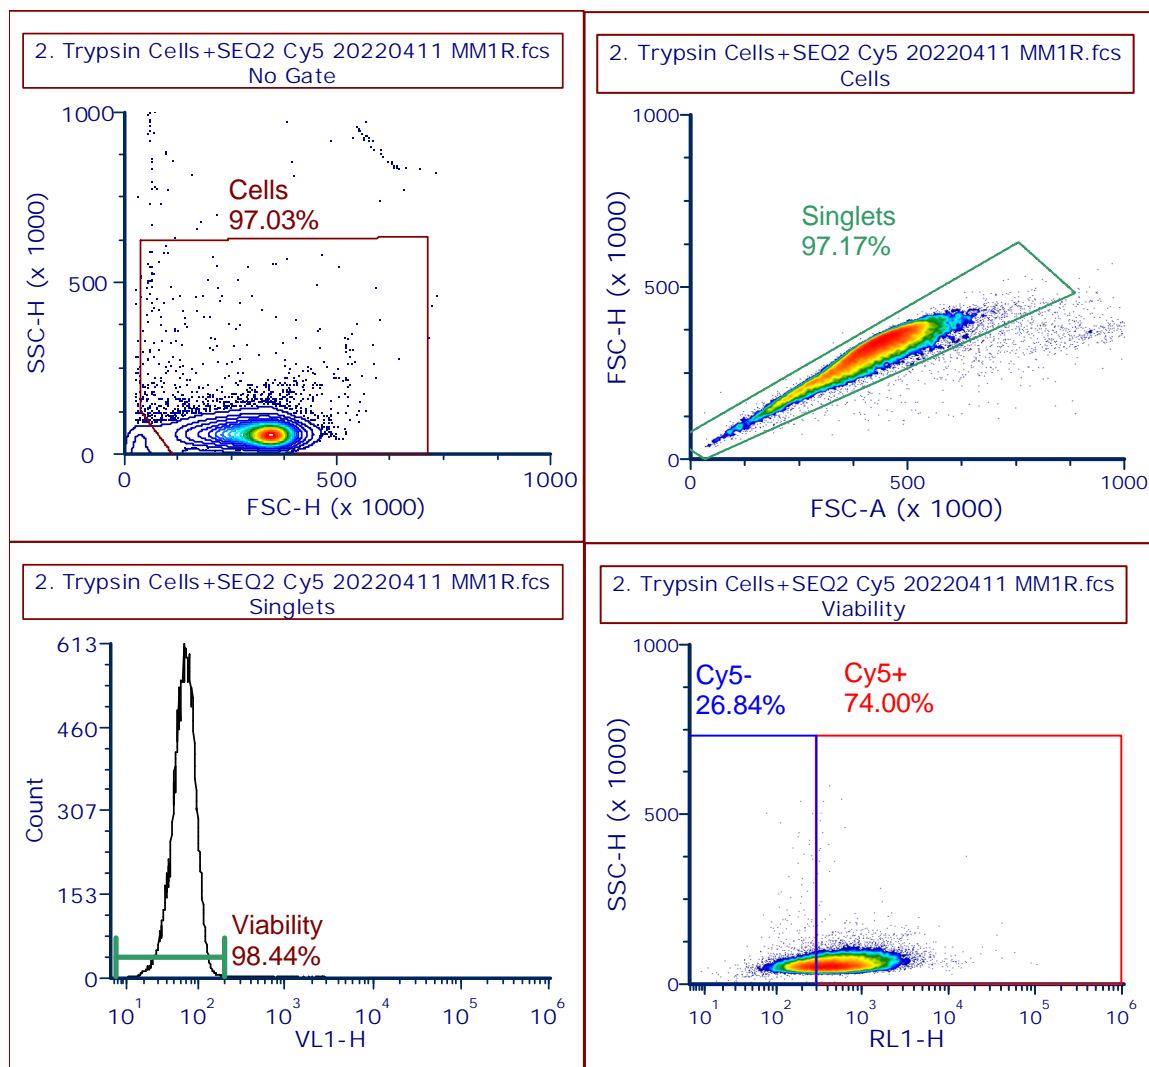

|   | A             | B          | C           | D              | E                |  |
|---|---------------|------------|-------------|----------------|------------------|--|
| 1 | Filename      | Gate       | # of Events | % of all cells | % of gated cells |  |
| 2 | 2. Trypsin Ce | All Events | 41095       | 100            | 100              |  |
| 3 | 2. Trypsin Ce | Cells      | 39875       | 97.03          | 97.03            |  |
| 4 | 2. Trypsin Ce | Singlets   | 38747       | 94.29          | 97.17            |  |
| 5 | 2. Trypsin Ce | Viability  | 38142       | 92.81          | 98.44            |  |
| 6 | 2. Trypsin Ce | Cy5+       | 28224       | 68.68          | 74               |  |
| 7 | 2. Trypsin Ce | Cy5-       | 10237       | 24.91          | 26.84            |  |
| 8 |               |            |             |                |                  |  |
| 9 |               |            |             |                |                  |  |



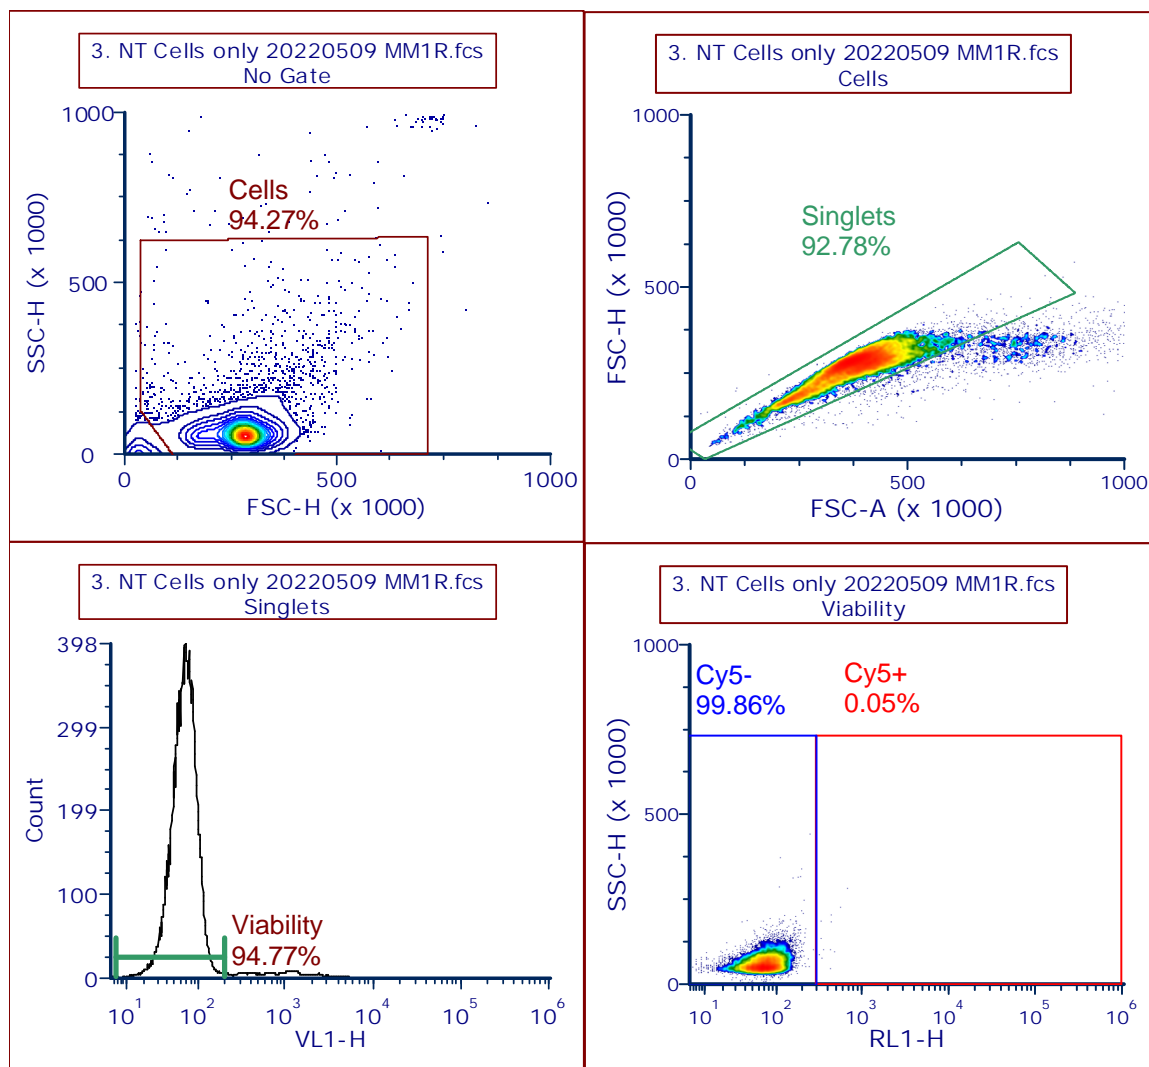

|   | A              | B          | C           | D              | E                |
|---|----------------|------------|-------------|----------------|------------------|
| 1 | Filename       | Gate       | # of Events | % of all cells | % of gated cells |
| 2 | 3. NT Cells on | All Events | 31376       | 100            | 100              |
| 3 | 3. NT Cells on | Cells      | 29577       | 94.27          | 94.27            |
| 4 | 3. NT Cells on | Singlets   | 27443       | 87.46          | 92.78            |
| 5 | 3. NT Cells on | Viability  | 26007       | 82.89          | 94.77            |
| 6 | 3. NT Cells on | Cy5+       | 12          | 0.04           | 0.05             |
| 7 | 3. NT Cells on | Cy5-       | 25971       | 82.77          | 99.86            |
| 8 |                |            |             |                |                  |
| 9 |                |            |             |                |                  |

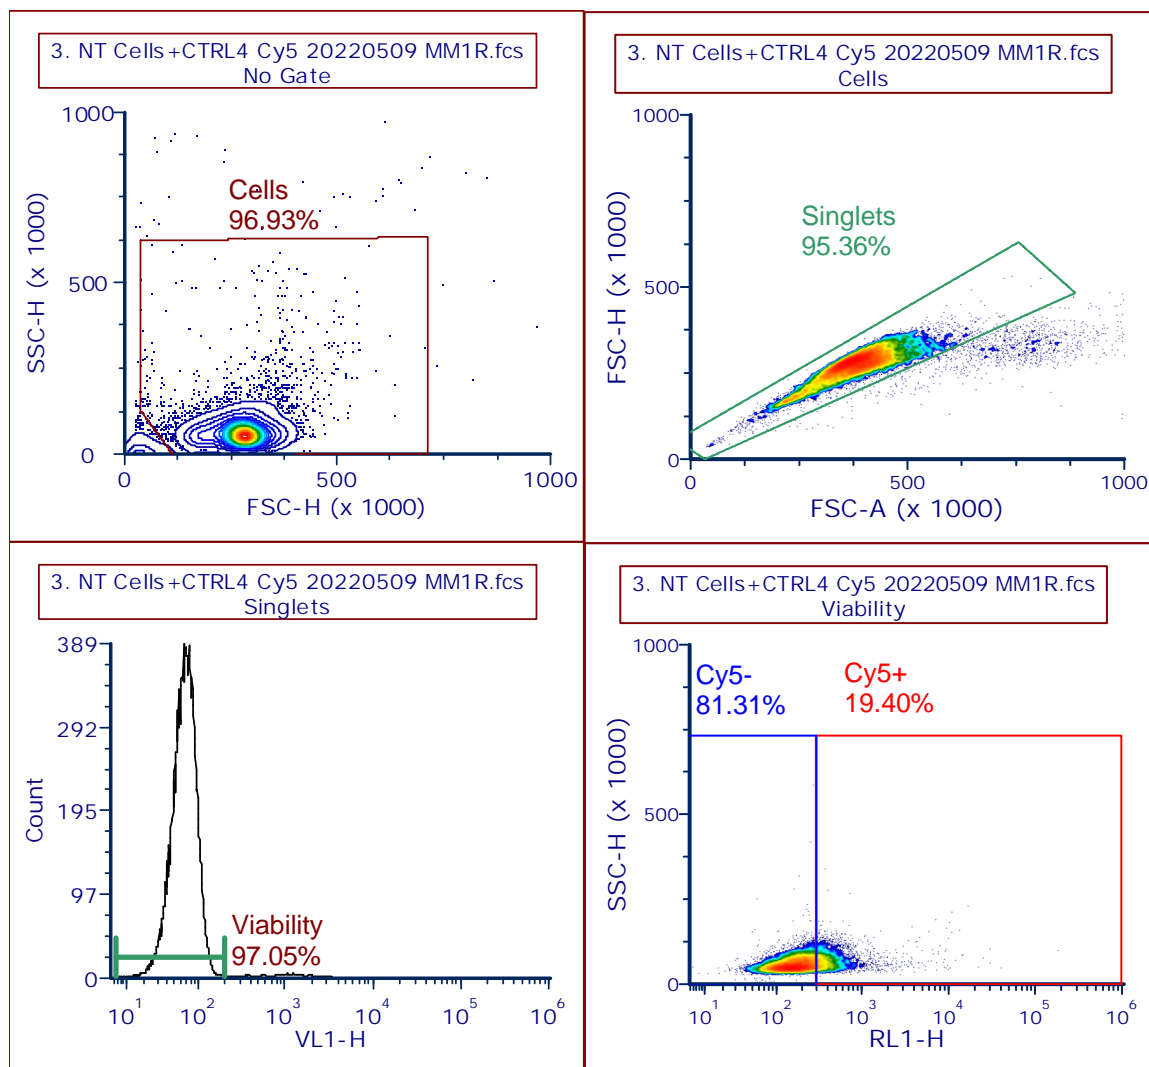

|   | A             | B          | C           | D              | E                |
|---|---------------|------------|-------------|----------------|------------------|
| 1 | Filename      | Gate       | # of Events | % of all cells | % of gated cells |
| 2 | 3. NT Cells+C | All Events | 28202       | 100            | 100              |
| 3 | 3. NT Cells+C | Cells      | 27336       | 96.93          | 96.93            |
| 4 | 3. NT Cells+C | Singlets   | 26068       | 92.43          | 95.36            |
| 5 | 3. NT Cells+C | Viability  | 25298       | 89.7           | 97.05            |
| 6 | 3. NT Cells+C | Cy5+       | 4908        | 17.4           | 19.4             |
| 7 | 3. NT Cells+C | Cy5-       | 20571       | 72.94          | 81.31            |
| 8 |               |            |             |                |                  |
| 9 |               |            |             |                |                  |

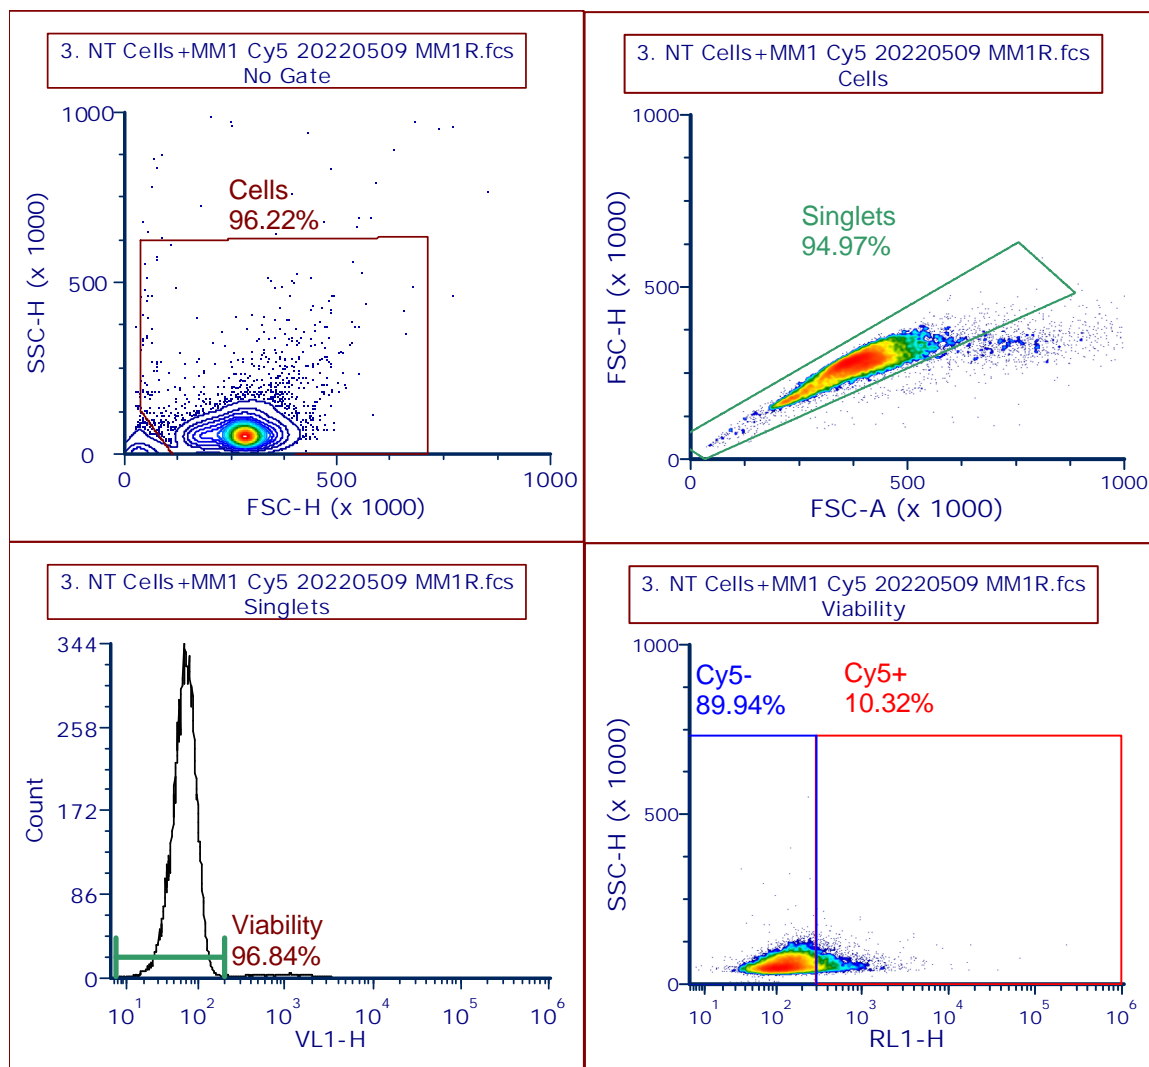

|   | A              | B          | C           | D              | E                |  |
|---|----------------|------------|-------------|----------------|------------------|--|
| 1 | Filename       | Gate       | # of Events | % of all cells | % of gated cells |  |
| 2 | 3. NT Cells+IV | All Events | 24346       | 100            | 100              |  |
| 3 | 3. NT Cells+IV | Cells      | 23426       | 96.22          | 96.22            |  |
| 4 | 3. NT Cells+IV | Singlets   | 22247       | 91.38          | 94.97            |  |
| 5 | 3. NT Cells+IV | Viability  | 21544       | 88.49          | 96.84            |  |
| 6 | 3. NT Cells+IV | Cy5+       | 2224        | 9.13           | 10.32            |  |
| 7 | 3. NT Cells+IV | Cy5-       | 19377       | 79.59          | 89.94            |  |
| 8 |                |            |             |                |                  |  |
| 9 |                |            |             |                |                  |  |

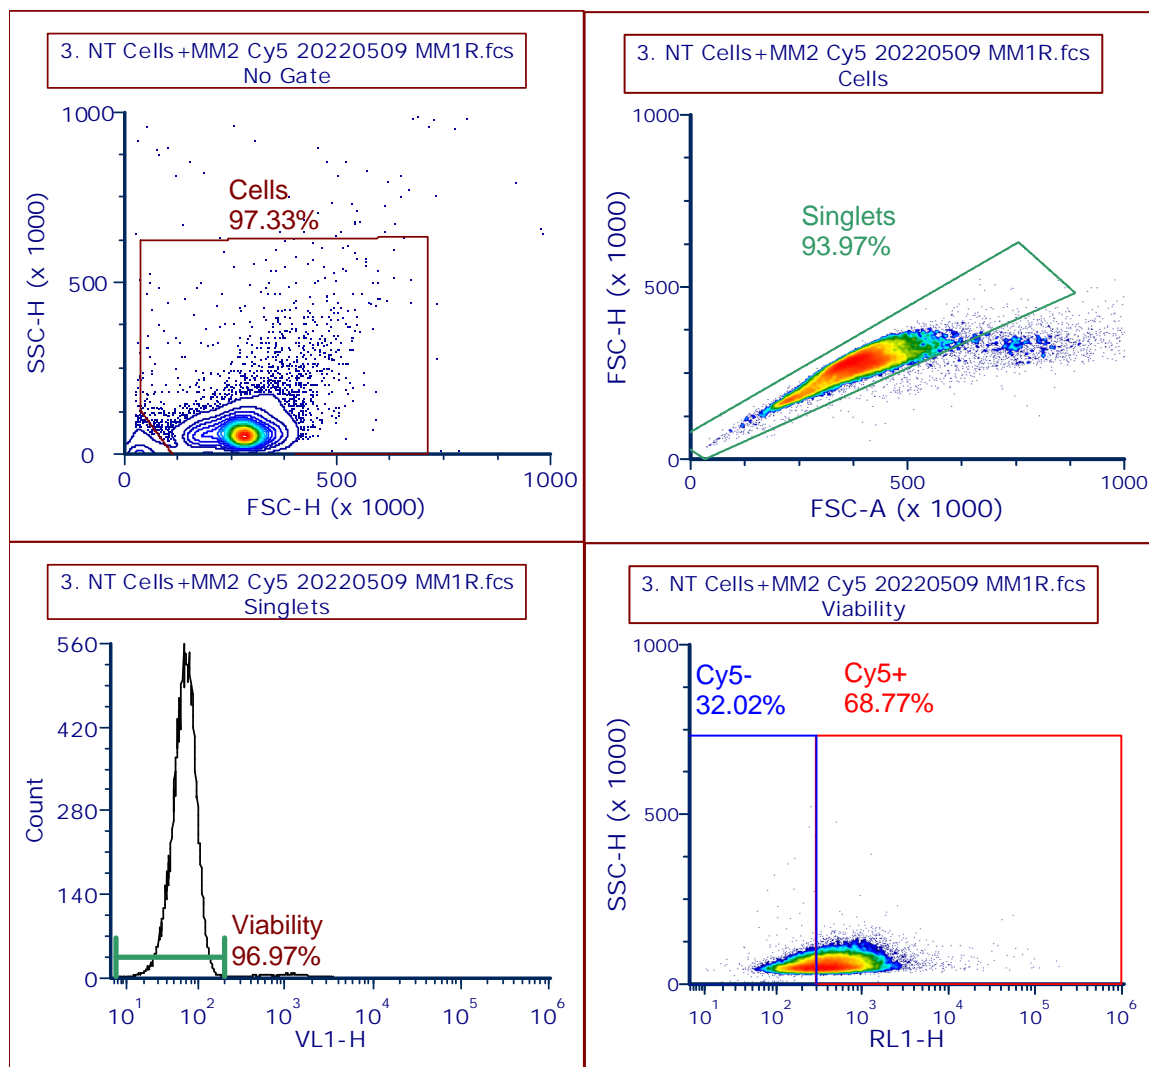

|   | A              | B          | C           | D              | E                |
|---|----------------|------------|-------------|----------------|------------------|
| 1 | Filename       | Gate       | # of Events | % of all cells | % of gated cells |
| 2 | 3. NT Cells+IV | All Events | 39756       | 100            | 100              |
| 3 | 3. NT Cells+IV | Cells      | 38694       | 97.33          | 97.33            |
| 4 | 3. NT Cells+IV | Singlets   | 36361       | 91.46          | 93.97            |
| 5 | 3. NT Cells+IV | Viability  | 35258       | 88.69          | 96.97            |
| 6 | 3. NT Cells+IV | Cy5+       | 24246       | 60.99          | 68.77            |
| 7 | 3. NT Cells+IV | Cy5-       | 11290       | 28.4           | 32.02            |
| 8 |                |            |             |                |                  |
| 9 |                |            |             |                |                  |

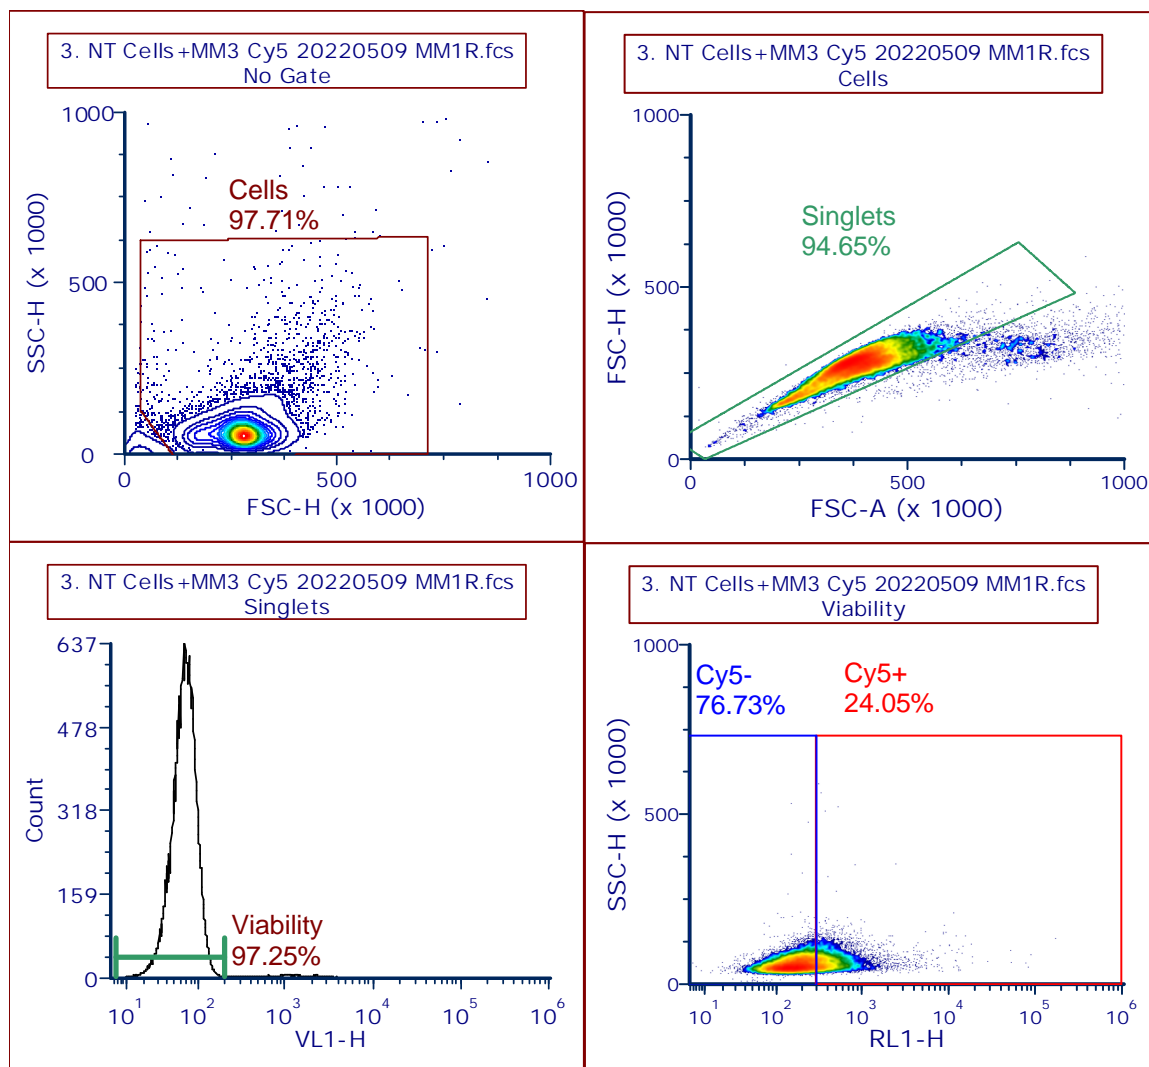

|   | A              | B          | C           | D              | E                |
|---|----------------|------------|-------------|----------------|------------------|
| 1 | Filename       | Gate       | # of Events | % of all cells | % of gated cells |
| 2 | 3. NT Cells+IV | All Events | 44523       | 100            | 100              |
| 3 | 3. NT Cells+IV | Cells      | 43505       | 97.71          | 97.71            |
| 4 | 3. NT Cells+IV | Singlets   | 41178       | 92.49          | 94.65            |
| 5 | 3. NT Cells+IV | Viability  | 40047       | 89.95          | 97.25            |
| 6 | 3. NT Cells+IV | Cy5+       | 9631        | 21.63          | 24.05            |
| 7 | 3. NT Cells+IV | Cy5-       | 30729       | 69.02          | 76.73            |
| 8 |                |            |             |                |                  |
| 9 |                |            |             |                |                  |

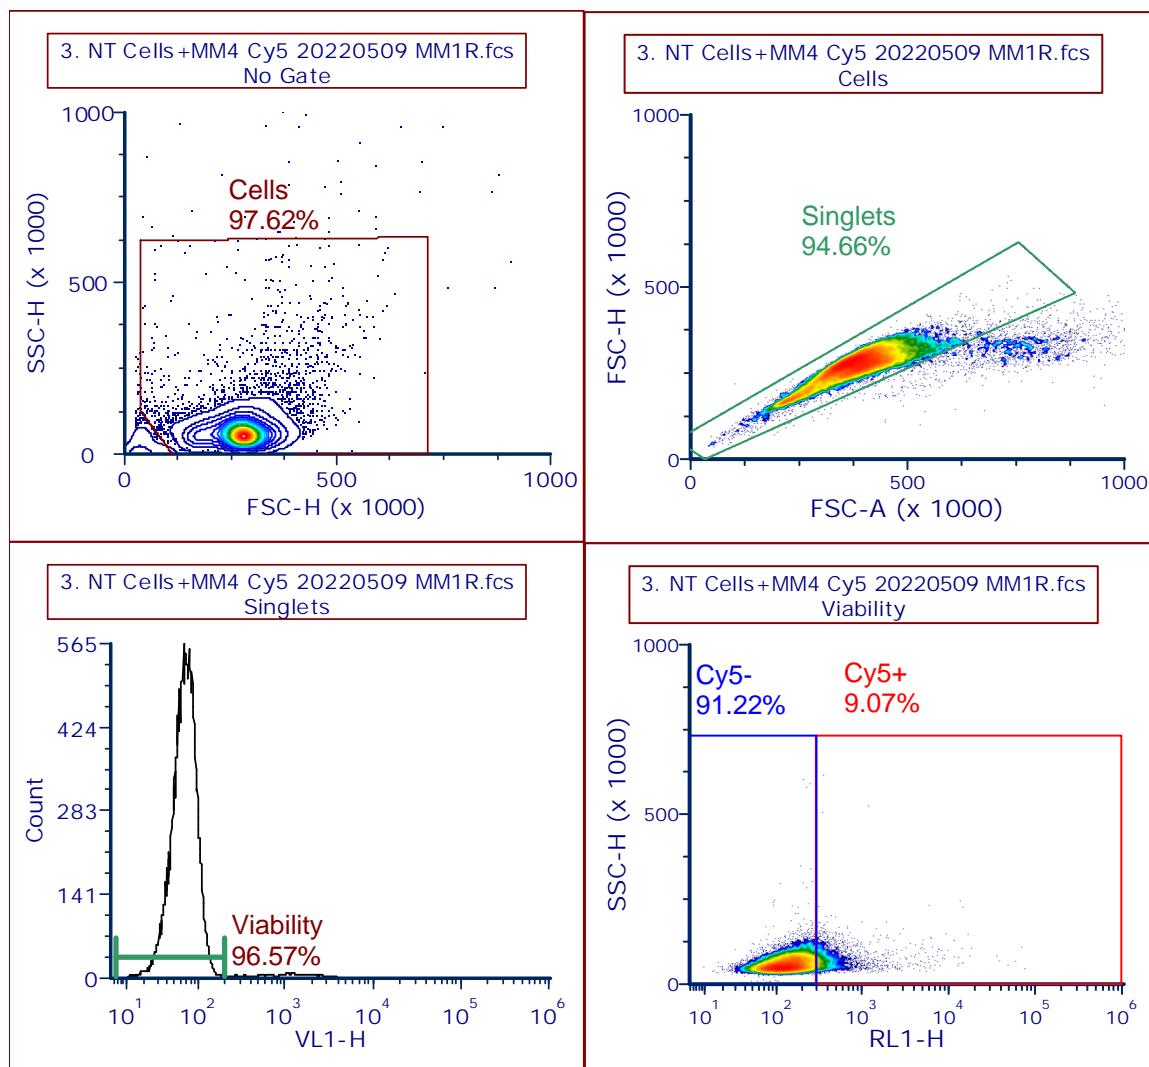

|   | A              | B          | C           | D              | E                |
|---|----------------|------------|-------------|----------------|------------------|
| 1 | Filename       | Gate       | # of Events | % of all cells | % of gated cells |
| 2 | 3. NT Cells+IV | All Events | 40874       | 100            | 100              |
| 3 | 3. NT Cells+IV | Cells      | 39900       | 97.62          | 97.62            |
| 4 | 3. NT Cells+IV | Singlets   | 37768       | 92.4           | 94.66            |
| 5 | 3. NT Cells+IV | Viability  | 36474       | 89.24          | 96.57            |
| 6 | 3. NT Cells+IV | Cy5+       | 3309        | 8.1            | 9.07             |
| 7 | 3. NT Cells+IV | Cy5-       | 33271       | 81.4           | 91.22            |
| 8 |                |            |             |                |                  |
| 9 |                |            |             |                |                  |

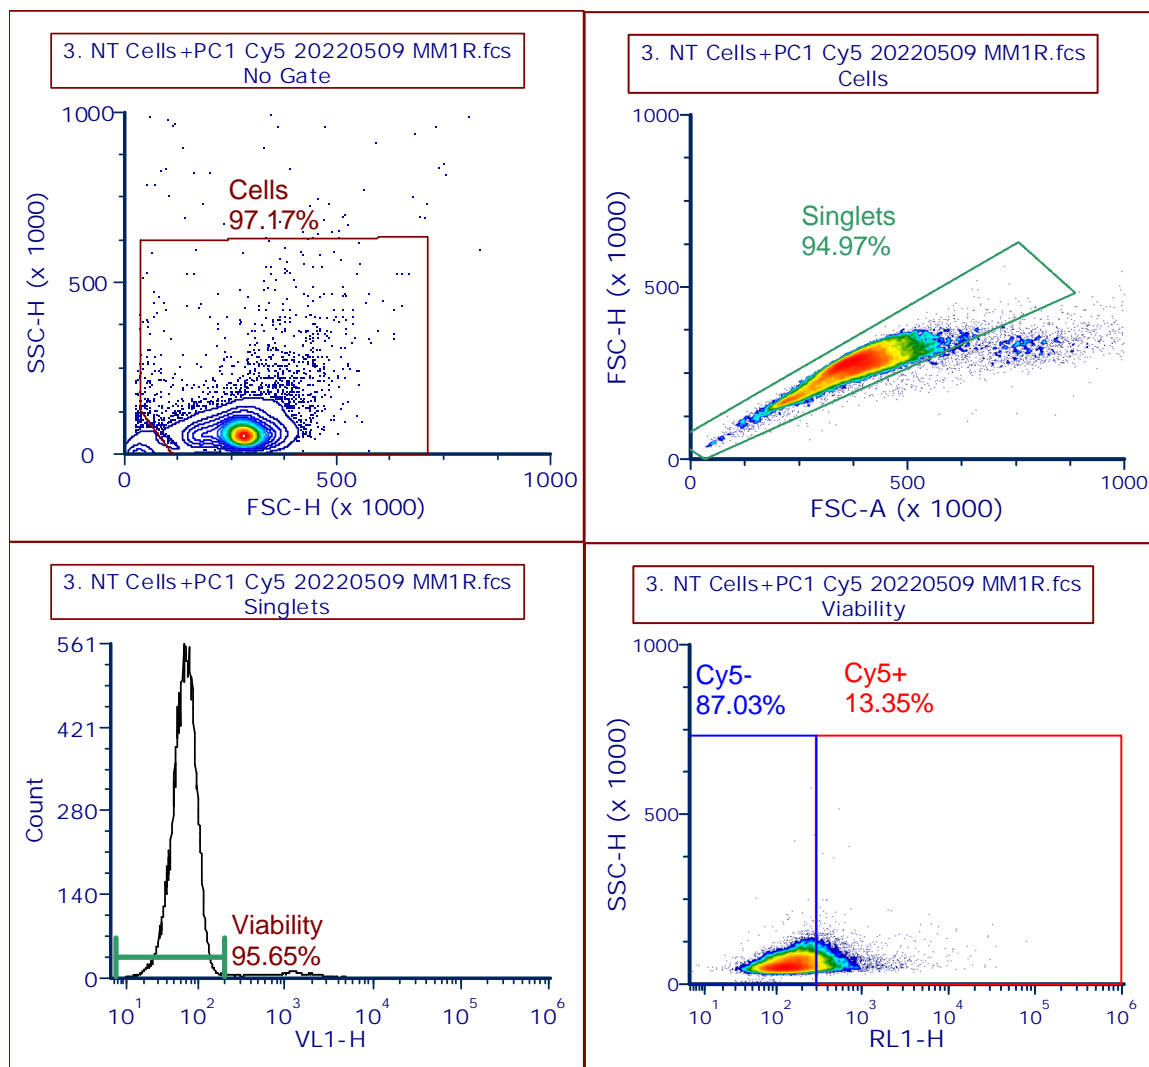

|   | A               | B          | C           | D              | E                |  |
|---|-----------------|------------|-------------|----------------|------------------|--|
| 1 | Filename        | Gate       | # of Events | % of all cells | % of gated cells |  |
| 2 | 3. NT Cells+PC1 | All Events | 41454       | 100            | 100              |  |
| 3 | 3. NT Cells+PC1 | Cells      | 40282       | 97.17          | 97.17            |  |
| 4 | 3. NT Cells+PC1 | Singlets   | 38256       | 92.29          | 94.97            |  |
| 5 | 3. NT Cells+PC1 | Viability  | 36592       | 88.27          | 95.65            |  |
| 6 | 3. NT Cells+PC1 | Cy5+       | 4885        | 11.78          | 13.35            |  |
| 7 | 3. NT Cells+PC1 | Cy5-       | 31845       | 76.82          | 87.03            |  |
| 8 |                 |            |             |                |                  |  |
| 9 |                 |            |             |                |                  |  |

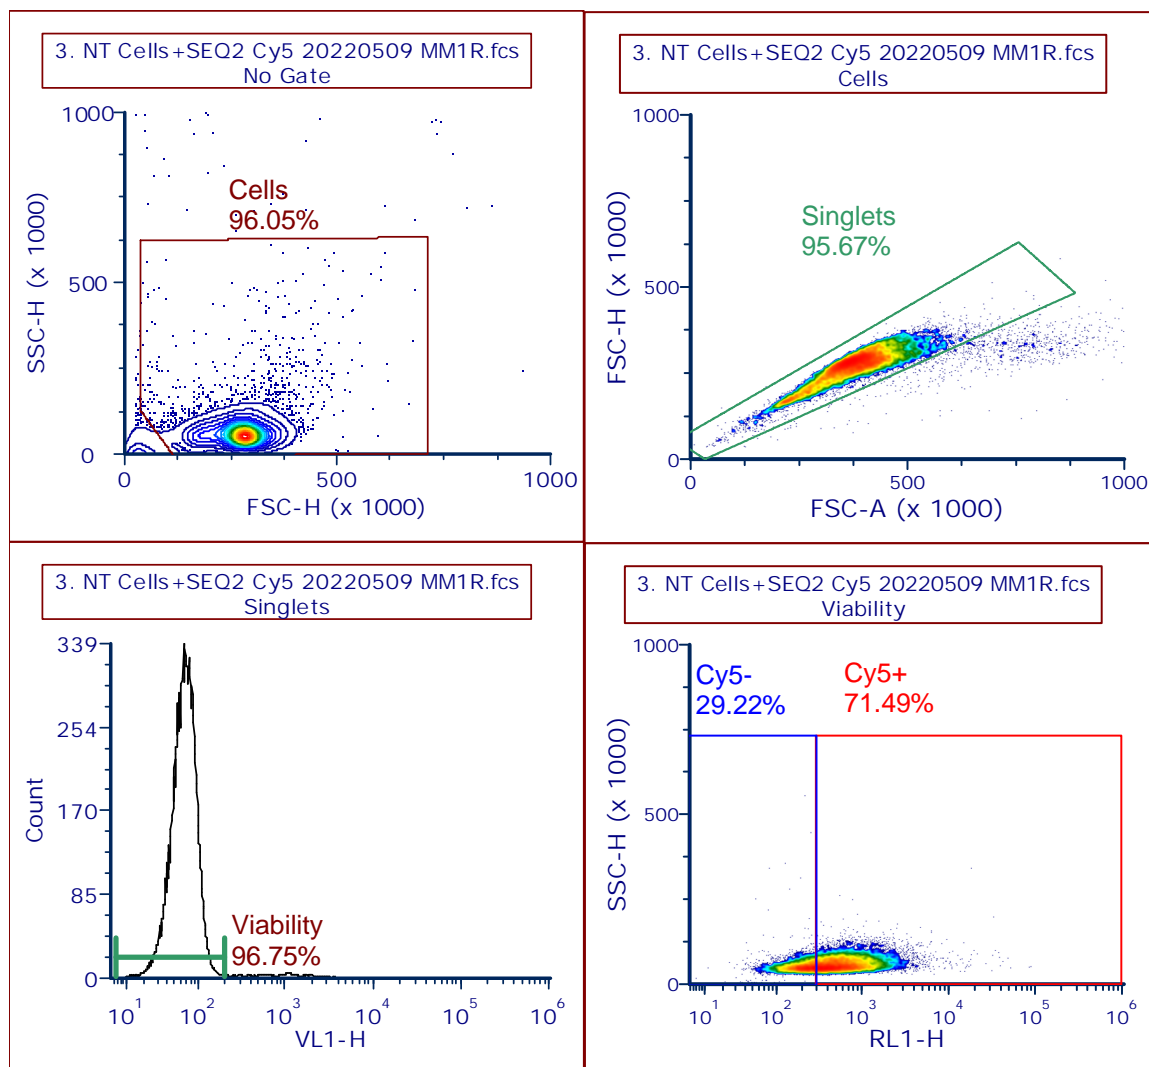

|   | A             | B          | C           | D              | E                |  |
|---|---------------|------------|-------------|----------------|------------------|--|
| 1 | Filename      | Gate       | # of Events | % of all cells | % of gated cells |  |
| 2 | 3. NT Cells+S | All Events | 24548       | 100            | 100              |  |
| 3 | 3. NT Cells+S | Cells      | 23579       | 96.05          | 96.05            |  |
| 4 | 3. NT Cells+S | Singlets   | 22557       | 91.89          | 95.67            |  |
| 5 | 3. NT Cells+S | Viability  | 21824       | 88.9           | 96.75            |  |
| 6 | 3. NT Cells+S | Cy5+       | 15601       | 63.55          | 71.49            |  |
| 7 | 3. NT Cells+S | Cy5-       | 6377        | 25.98          | 29.22            |  |
| 8 |               |            |             |                |                  |  |
| 9 |               |            |             |                |                  |  |



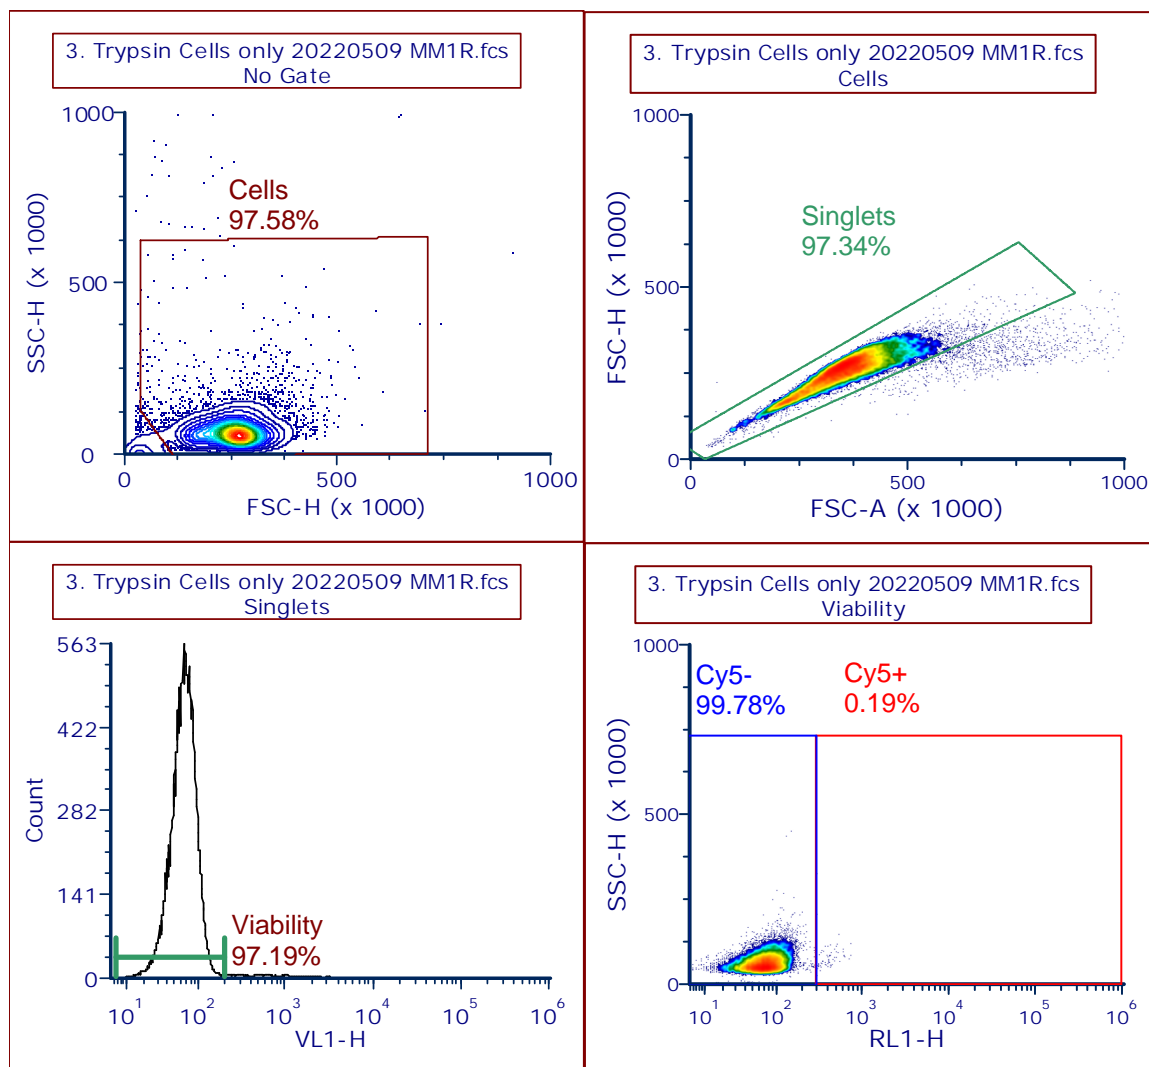

|   | A             | B          | C           | D              | E                |
|---|---------------|------------|-------------|----------------|------------------|
| 1 | Filename      | Gate       | # of Events | % of all cells | % of gated cells |
| 2 | 3. Trypsin Ce | All Events | 38384       | 100            | 100              |
| 3 | 3. Trypsin Ce | Cells      | 37455       | 97.58          | 97.58            |
| 4 | 3. Trypsin Ce | Singlets   | 36458       | 94.98          | 97.34            |
| 5 | 3. Trypsin Ce | Viability  | 35432       | 92.31          | 97.19            |
| 6 | 3. Trypsin Ce | Cy5+       | 66          | 0.17           | 0.19             |
| 7 | 3. Trypsin Ce | Cy5-       | 35353       | 92.1           | 99.78            |
| 8 |               |            |             |                |                  |
| 9 |               |            |             |                |                  |

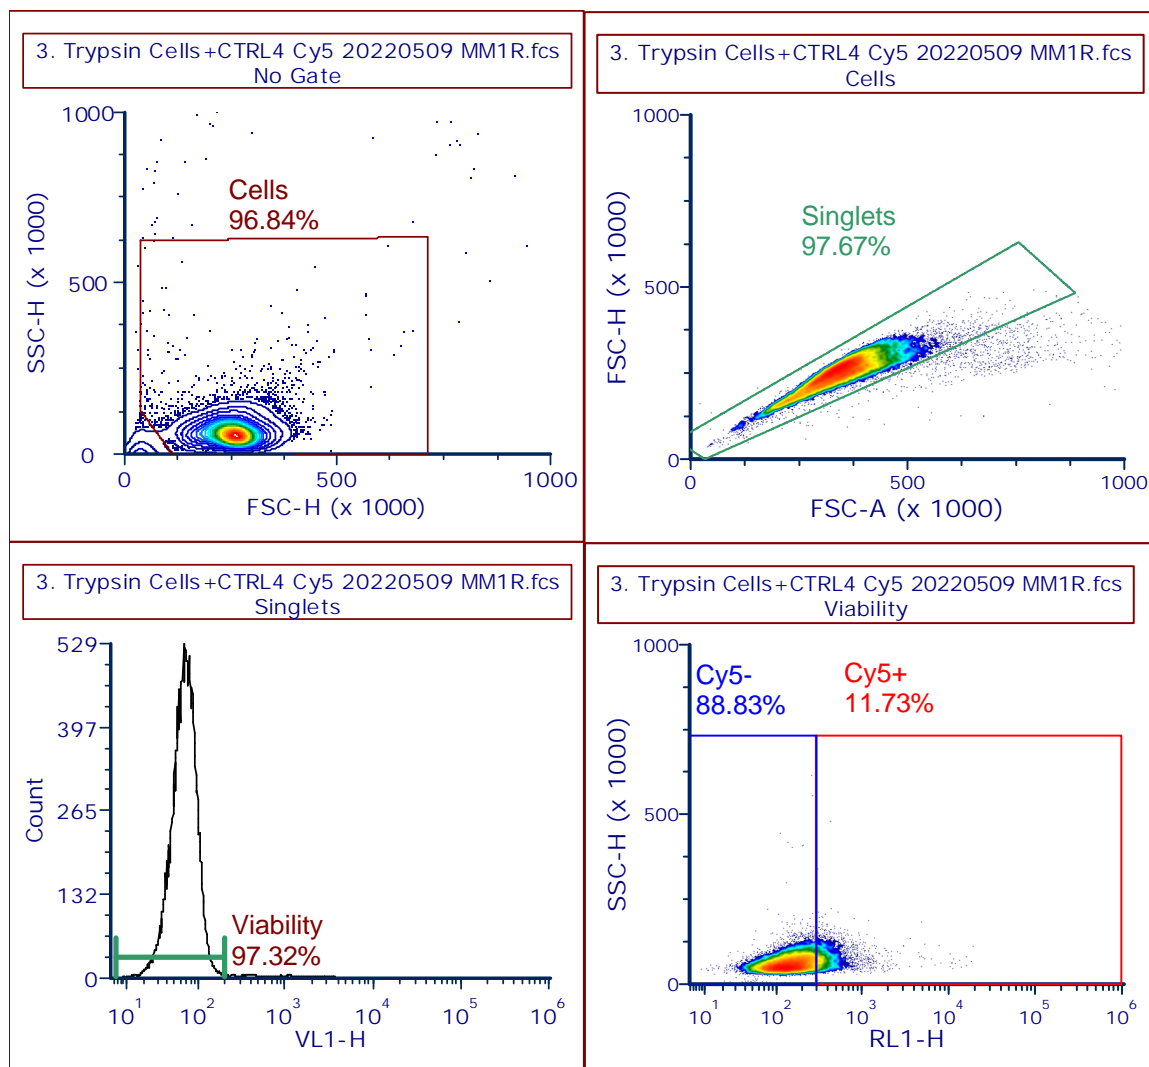

|   | A             | B          | C           | D              | E                |  |
|---|---------------|------------|-------------|----------------|------------------|--|
| 1 | Filename      | Gate       | # of Events | % of all cells | % of gated cells |  |
| 2 | 3. Trypsin Ce | All Events | 37514       | 100            | 100              |  |
| 3 | 3. Trypsin Ce | Cells      | 36329       | 96.84          | 96.84            |  |
| 4 | 3. Trypsin Ce | Singlets   | 35482       | 94.58          | 97.67            |  |
| 5 | 3. Trypsin Ce | Viability  | 34531       | 92.05          | 97.32            |  |
| 6 | 3. Trypsin Ce | Cy5+       | 4052        | 10.8           | 11.73            |  |
| 7 | 3. Trypsin Ce | Cy5-       | 30674       | 81.77          | 88.83            |  |
| 8 |               |            |             |                |                  |  |
| 9 |               |            |             |                |                  |  |

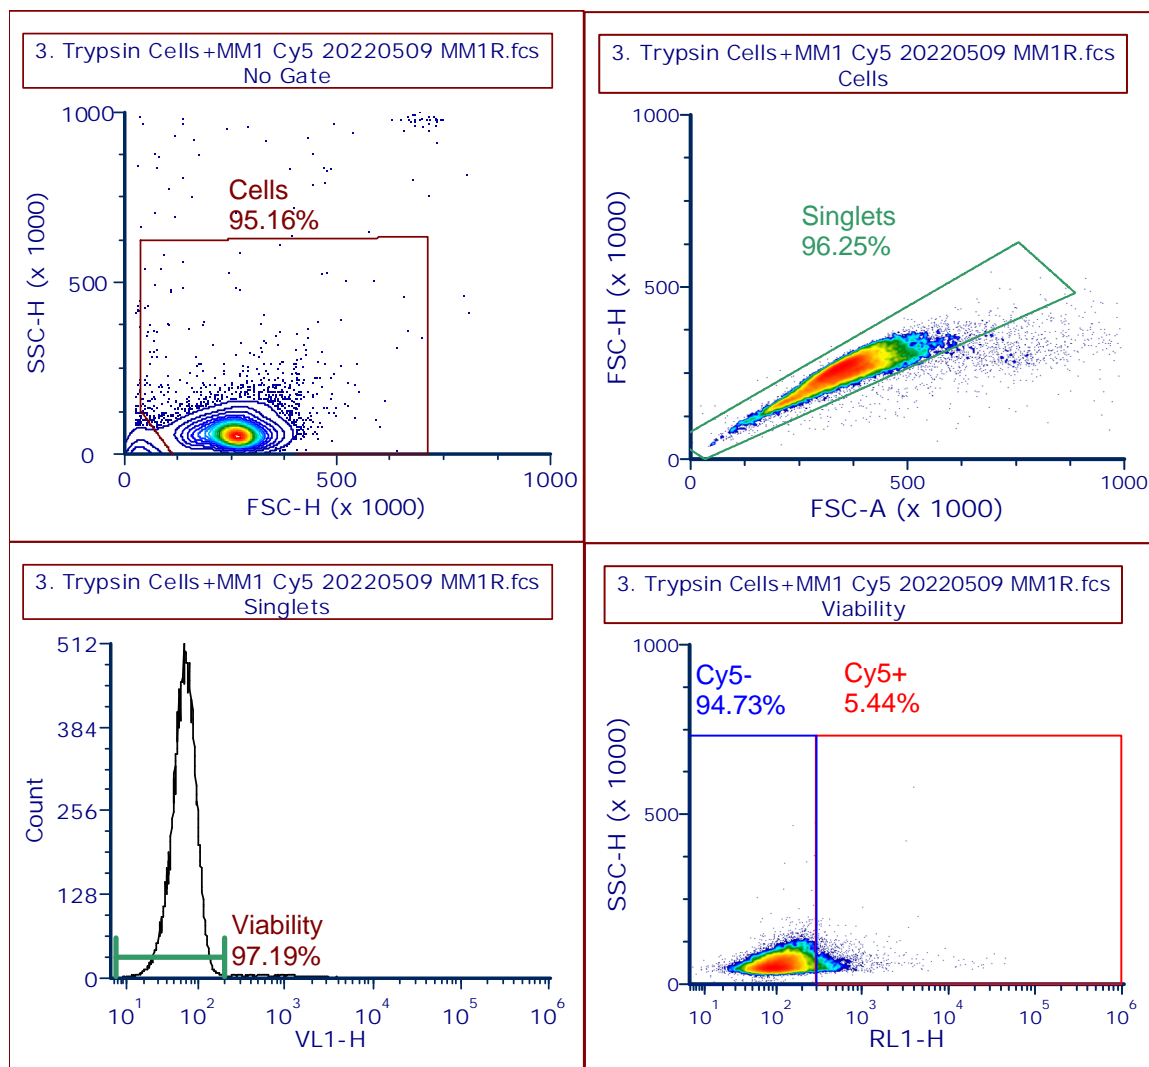

|   | A             | B          | C           | D              | E                |  |
|---|---------------|------------|-------------|----------------|------------------|--|
| 1 | Filename      | Gate       | # of Events | % of all cells | % of gated cells |  |
| 2 | 3. Trypsin Ce | All Events | 36470       | 100            | 100              |  |
| 3 | 3. Trypsin Ce | Cells      | 34706       | 95.16          | 95.16            |  |
| 4 | 3. Trypsin Ce | Singlets   | 33403       | 91.59          | 96.25            |  |
| 5 | 3. Trypsin Ce | Viability  | 32463       | 89.01          | 97.19            |  |
| 6 | 3. Trypsin Ce | Cy5+       | 1766        | 4.84           | 5.44             |  |
| 7 | 3. Trypsin Ce | Cy5-       | 30753       | 84.32          | 94.73            |  |
| 8 |               |            |             |                |                  |  |
| 9 |               |            |             |                |                  |  |

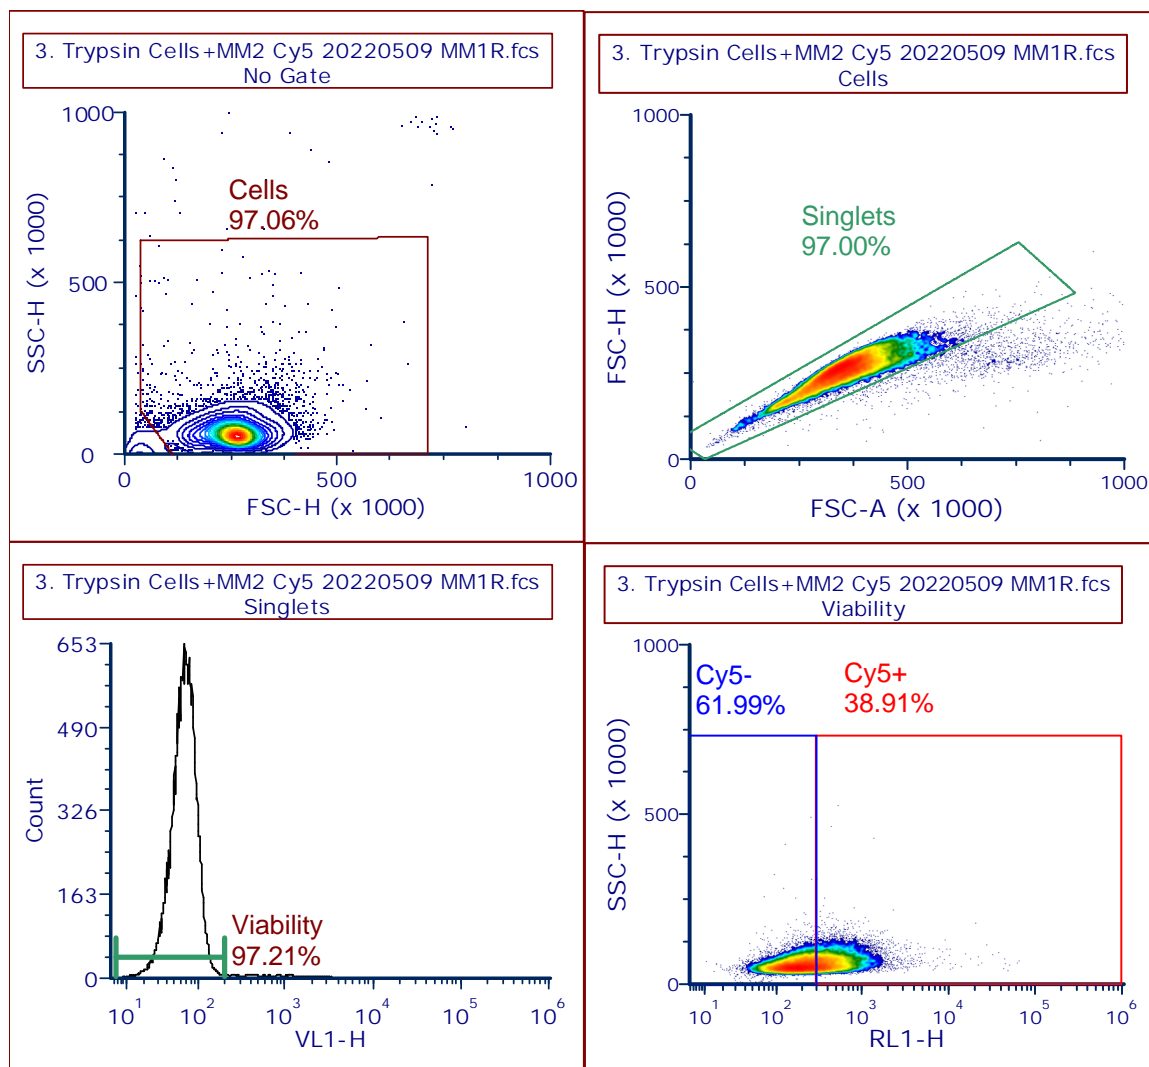

|   | A             | B          | C           | D              | E                |  |
|---|---------------|------------|-------------|----------------|------------------|--|
| 1 | Filename      | Gate       | # of Events | % of all cells | % of gated cells |  |
| 2 | 3. Trypsin Ce | All Events | 46150       | 100            | 100              |  |
| 3 | 3. Trypsin Ce | Cells      | 44792       | 97.06          | 97.06            |  |
| 4 | 3. Trypsin Ce | Singlets   | 43447       | 94.14          | 97               |  |
| 5 | 3. Trypsin Ce | Viability  | 42233       | 91.51          | 97.21            |  |
| 6 | 3. Trypsin Ce | Cy5+       | 16433       | 35.61          | 38.91            |  |
| 7 | 3. Trypsin Ce | Cy5-       | 26179       | 56.73          | 61.99            |  |
| 8 |               |            |             |                |                  |  |
| 9 |               |            |             |                |                  |  |

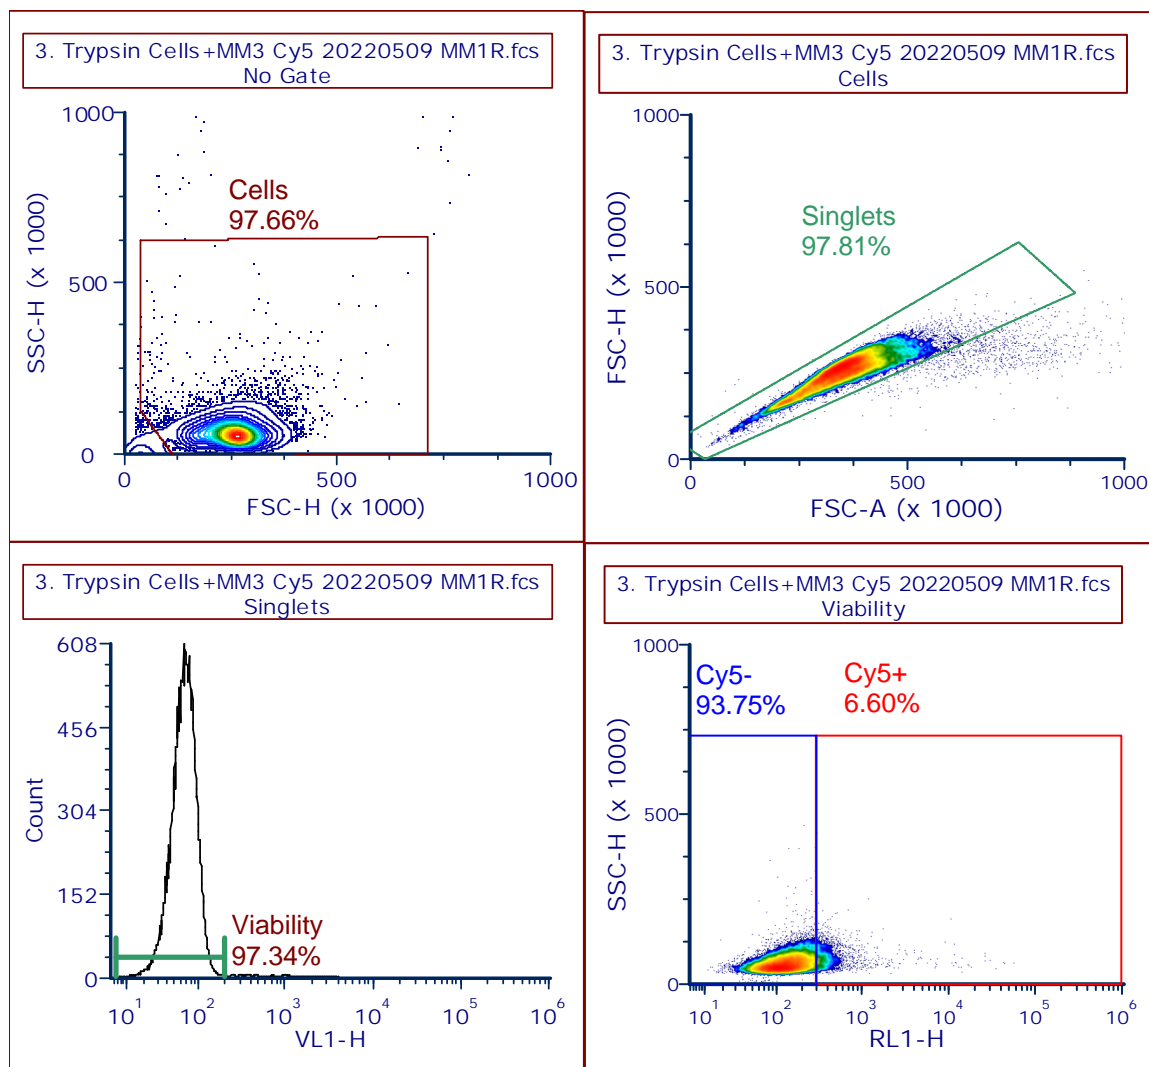

|   | A             | B          | C           | D              | E                |  |
|---|---------------|------------|-------------|----------------|------------------|--|
| 1 | Filename      | Gate       | # of Events | % of all cells | % of gated cells |  |
| 2 | 3. Trypsin Ce | All Events | 42165       | 100            | 100              |  |
| 3 | 3. Trypsin Ce | Cells      | 41177       | 97.66          | 97.66            |  |
| 4 | 3. Trypsin Ce | Singlets   | 40277       | 95.52          | 97.81            |  |
| 5 | 3. Trypsin Ce | Viability  | 39204       | 92.98          | 97.34            |  |
| 6 | 3. Trypsin Ce | Cy5+       | 2589        | 6.14           | 6.6              |  |
| 7 | 3. Trypsin Ce | Cy5-       | 36754       | 87.17          | 93.75            |  |
| 8 |               |            |             |                |                  |  |
| 9 |               |            |             |                |                  |  |

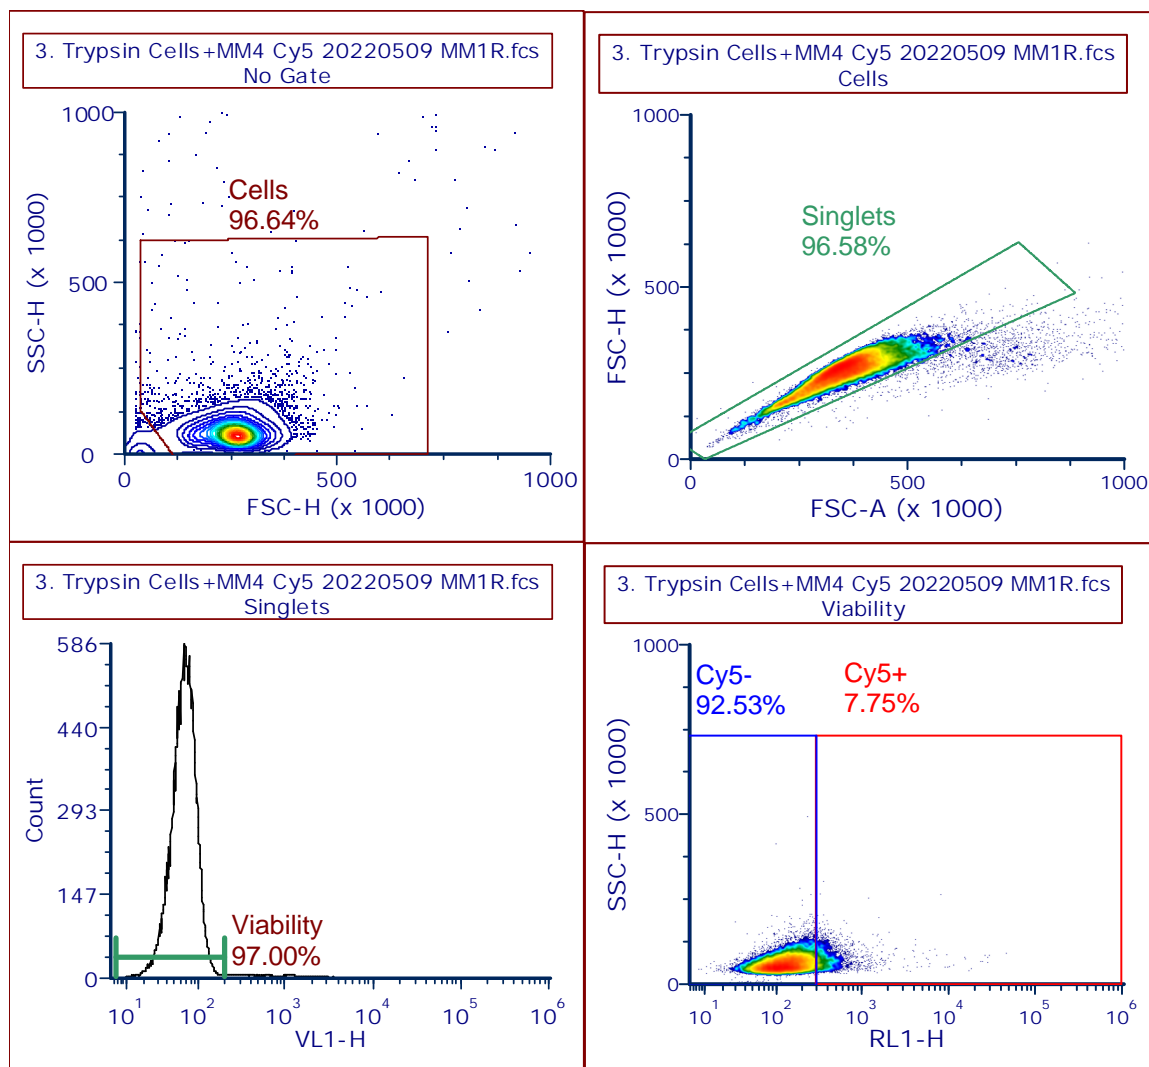

|   | A             | B          | C           | D              | E                |  |
|---|---------------|------------|-------------|----------------|------------------|--|
| 1 | Filename      | Gate       | # of Events | % of all cells | % of gated cells |  |
| 2 | 3. Trypsin Ce | All Events | 41398       | 100            | 100              |  |
| 3 | 3. Trypsin Ce | Cells      | 40008       | 96.64          | 96.64            |  |
| 4 | 3. Trypsin Ce | Singlets   | 38641       | 93.34          | 96.58            |  |
| 5 | 3. Trypsin Ce | Viability  | 37483       | 90.54          | 97               |  |
| 6 | 3. Trypsin Ce | Cy5+       | 2906        | 7.02           | 7.75             |  |
| 7 | 3. Trypsin Ce | Cy5-       | 34682       | 83.78          | 92.53            |  |
| 8 |               |            |             |                |                  |  |
| 9 |               |            |             |                |                  |  |

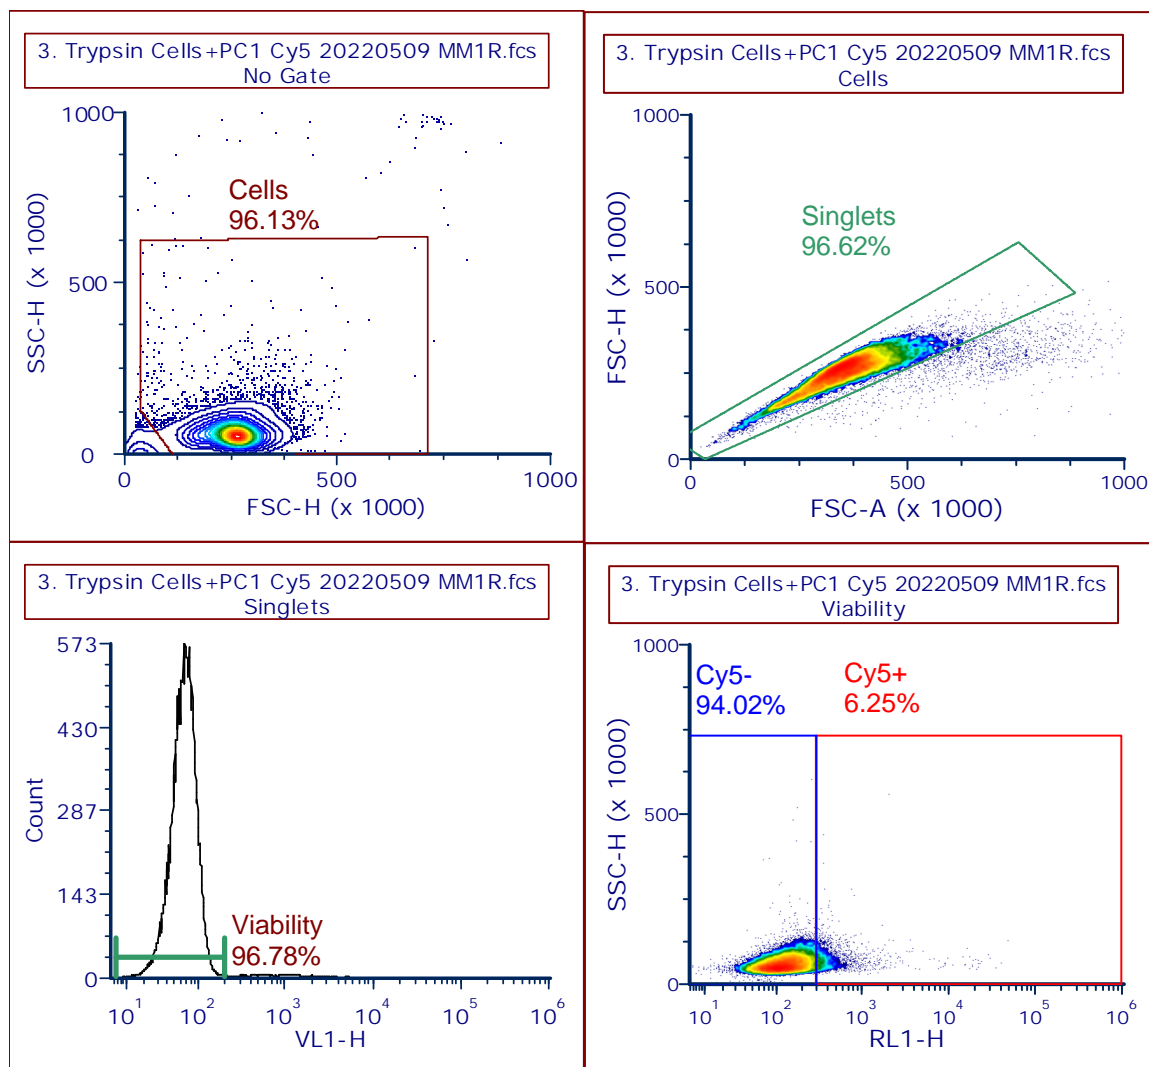

|   | A             | B          | C           | D              | E                |
|---|---------------|------------|-------------|----------------|------------------|
| 1 | Filename      | Gate       | # of Events | % of all cells | % of gated cells |
| 2 | 3. Trypsin Ce | All Events | 41437       | 100            | 100              |
| 3 | 3. Trypsin Ce | Cells      | 39833       | 96.13          | 96.13            |
| 4 | 3. Trypsin Ce | Singlets   | 38487       | 92.88          | 96.62            |
| 5 | 3. Trypsin Ce | Viability  | 37249       | 89.89          | 96.78            |
| 6 | 3. Trypsin Ce | Cy5+       | 2328        | 5.62           | 6.25             |
| 7 | 3. Trypsin Ce | Cy5-       | 35020       | 84.51          | 94.02            |
| 8 |               |            |             |                |                  |
| 9 |               |            |             |                |                  |

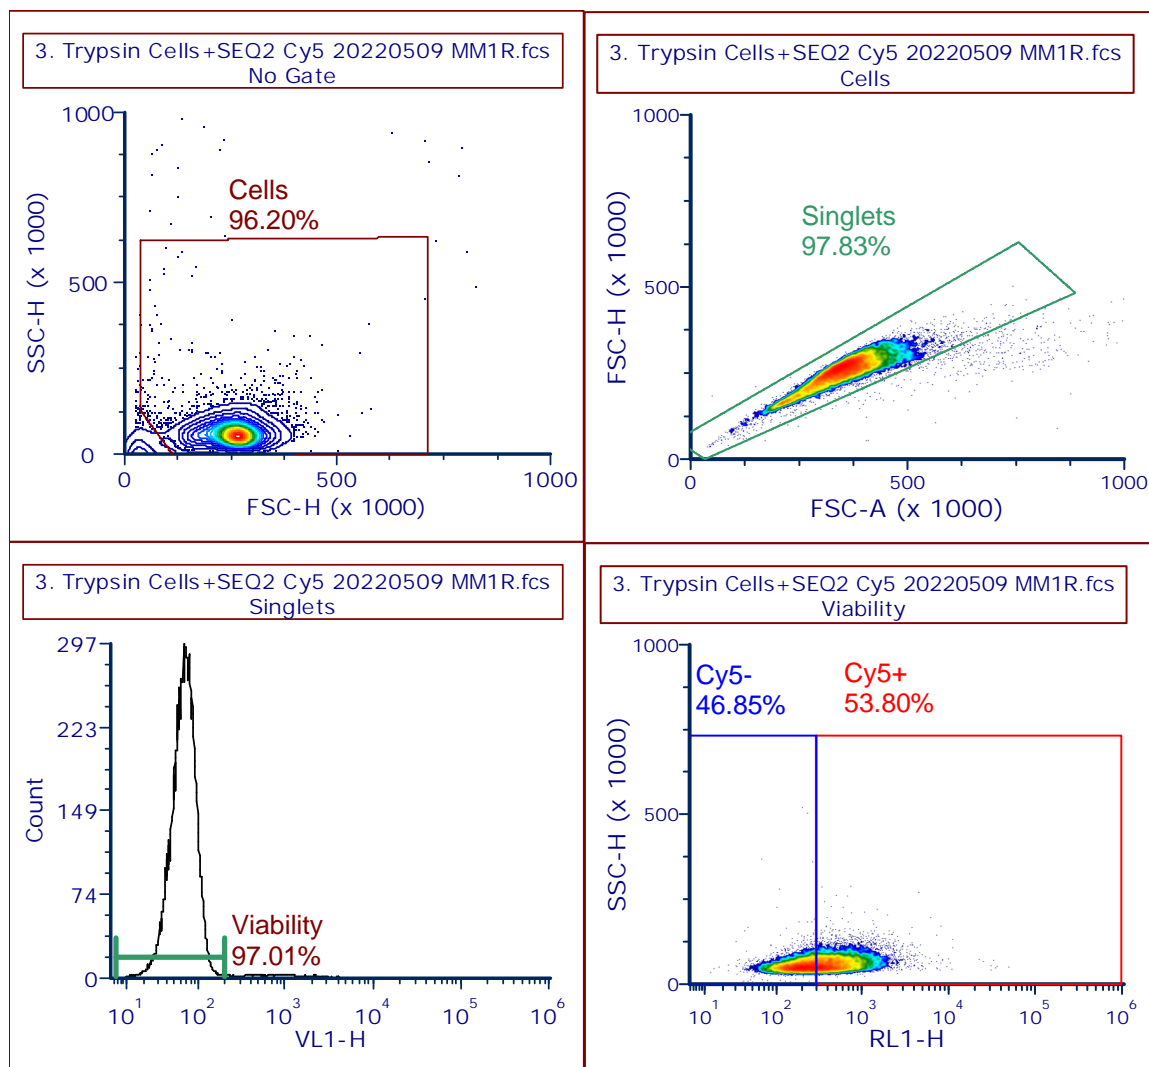

|   | A             | B          | C           | D              | E                |  |
|---|---------------|------------|-------------|----------------|------------------|--|
| 1 | Filename      | Gate       | # of Events | % of all cells | % of gated cells |  |
| 2 | 3. Trypsin Ce | All Events | 20834       | 100            | 100              |  |
| 3 | 3. Trypsin Ce | Cells      | 20043       | 96.2           | 96.2             |  |
| 4 | 3. Trypsin Ce | Singlets   | 19609       | 94.12          | 97.83            |  |
| 5 | 3. Trypsin Ce | Viability  | 19023       | 91.31          | 97.01            |  |
| 6 | 3. Trypsin Ce | Cy5+       | 10234       | 49.12          | 53.8             |  |
| 7 | 3. Trypsin Ce | Cy5-       | 8913        | 42.78          | 46.85            |  |
| 8 |               |            |             |                |                  |  |
| 9 |               |            |             |                |                  |  |
