# Supplementary material for: A retrotransposon-derived DNA zip code internalizes myeloma cells through Clathrin-Rab5a-mediated endocytosis
Source: Frontiers journal article supplement (doi:10.3389/fonc.2024.1288724), 2024-02-23
Supplement: Data_Sheet_1.ZIP [file Data_Sheet_1.ZIP]

All Events - 1. NT Cells+SEQ2 Cy5

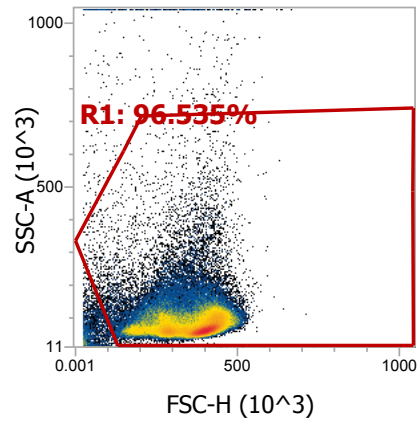

R1 - 1. NT Cells+SEQ2 Cy5

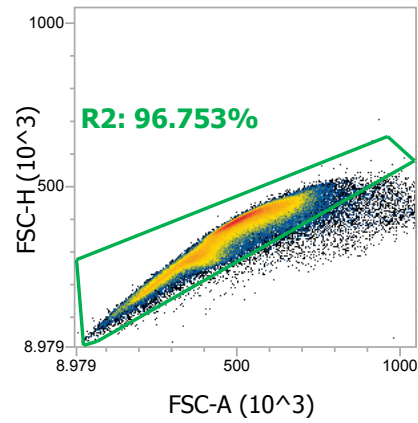

R2 - 1. NT Cells+SEQ2 Cy5

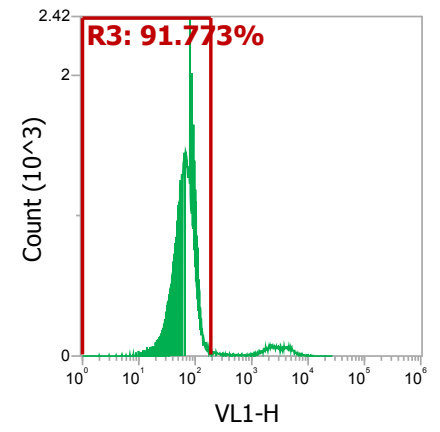

R3 - 1. NT Cells+SEQ2 Cy5

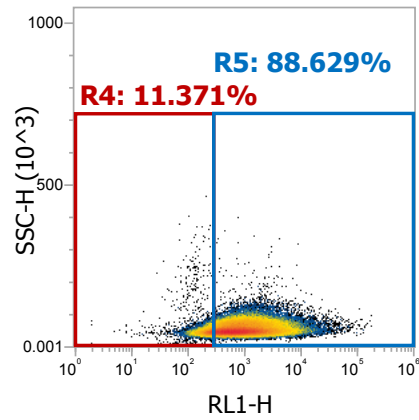

Experiment: **20210901**

Sample: **1. NT Cells+SEQ2 Cy5**

Time Recorded: **12:46:44**

| Name         | Gate       | X Parameter | Y Parameter | Count   | %Total  | %Gated  |
|--------------|------------|-------------|-------------|---------|---------|---------|
| ▢ All Events | All Events | N/A         | N/A         | 101,024 | 100.000 | 100.000 |
| ▢ R1         | R1         | FSC - FSC-H | SSC - SSC-A | 97,524  | 96.535  | 96.535  |
| ▢ R2         | R2         | FSC - FSC-A | FSC - FSC-H | 94,357  | 93.401  | 96.753  |
| ▢ R3         | R3         | VL1 - VL1-H |             | 86,594  | 85.716  | 91.773  |
| ▢ R4         | R4         | RL1 - RL1-H | SSC - SSC-H | 9,847   | 9.747   | 11.371  |
| ▢ R5         | R5         | RL1 - RL1-H | SSC - SSC-H | 76,747  | 75.969  | 88.629  |

All Events - 2. NT Cells+SEQ2 Cy5

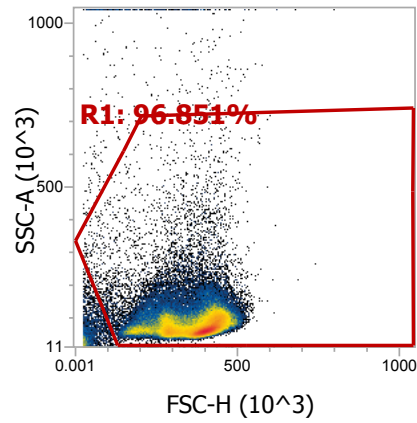

R1 - 2. NT Cells+SEQ2 Cy5

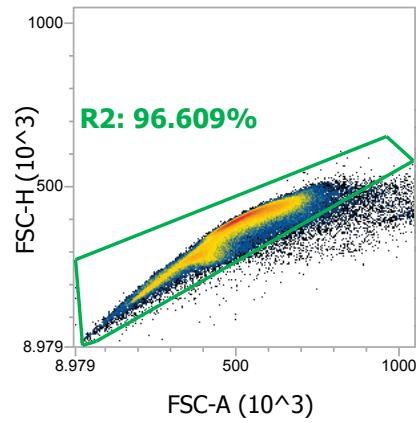

R2 - 2. NT Cells+SEQ2 Cy5

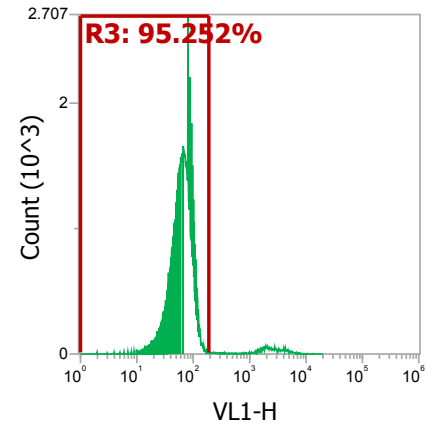

R3 - 2. NT Cells+SEQ2 Cy5

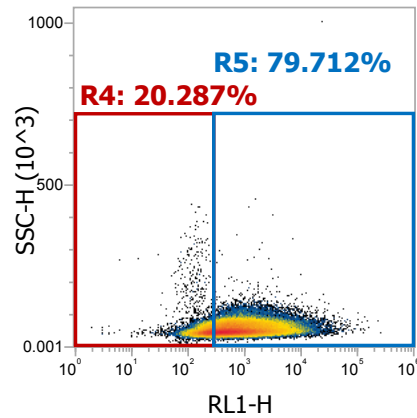

Experiment: **20210908**  
Sample: **2. NT Cells+SEQ2 Cy5**  
Time Recorded: **09:39:17**

| Name         | Gate       | X Parameter | Y Parameter | Count   | %Total  | %Gated  |
|--------------|------------|-------------|-------------|---------|---------|---------|
| ▢ All Events | All Events | N/A         | N/A         | 108,282 | 100.000 | 100.000 |
| ▢ R1         | R1         | FSC - FSC-H | SSC - SSC-A | 104,872 | 96.851  | 96.851  |
| ▢ R2         | R2         | FSC - FSC-A | FSC - FSC-H | 101,316 | 93.567  | 96.609  |
| ▢ R3         | R3         | VL1 - VL1-H |             | 96,506  | 89.125  | 95.252  |
| ▢ R4         | R4         | RL1 - RL1-H | SSC - SSC-H | 19,578  | 18.081  | 20.287  |
| ▢ R5         | R5         | RL1 - RL1-H | SSC - SSC-H | 76,927  | 71.043  | 79.712  |

All Events - 3. NT Cells+SEQ2 Cy5

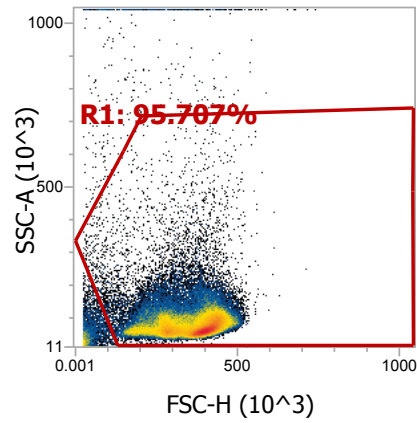

All Events - 3. NT Cells+SEQ2 Cy5

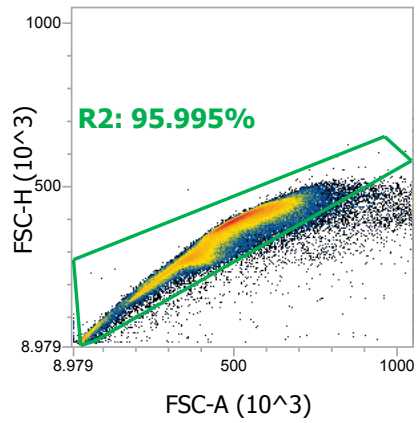

R2 - 3. NT Cells+SEQ2 Cy5

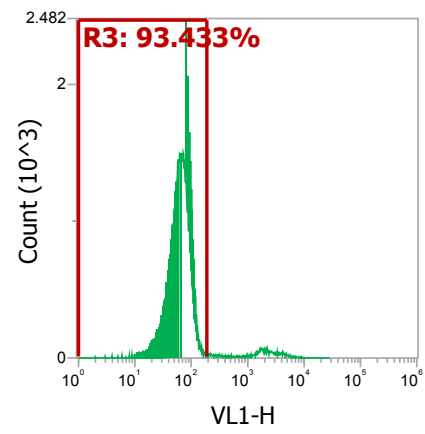

R3 - 3. NT Cells+SEQ2 Cy5

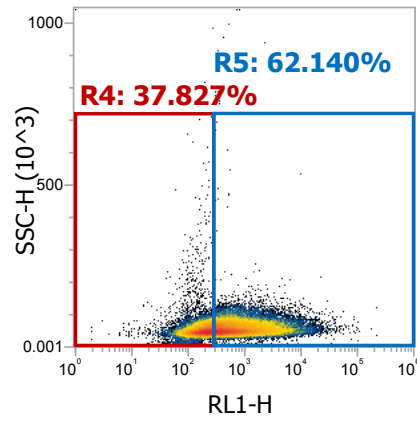

Experiment: **20210910**  
Sample: **3. NT Cells+SEQ2 Cy5**  
Time Recorded: **12:46:10**

| Name       | Gate       | X Parameter | Y Parameter | Count   | %Total  | %Gated  |
|------------|------------|-------------|-------------|---------|---------|---------|
| All Events | All Events | N/A         | N/A         | 100,774 | 100.000 | 100.000 |
| R1         | R1         | FSC - FSC-H | SSC - SSC-A | 96,448  | 95.707  | 95.707  |
| R2         | R2         | FSC - FSC-A | FSC - FSC-H | 96,738  | 95.995  | 95.995  |
| R3         | R3         | VL1 - VL1-H |             | 90,385  | 89.691  | 93.433  |
| R4         | R4         | RL1 - RL1-H | SSC - SSC-H | 34,190  | 33.927  | 37.827  |
| R5         | R5         | RL1 - RL1-H | SSC - SSC-H | 56,165  | 55.734  | 62.140  |

All Events - 4. NT Cells+SEQ2 Cy5

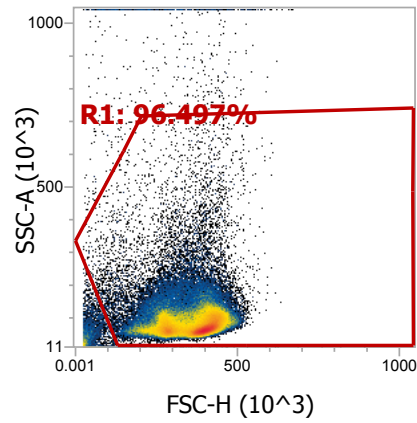

R1 - 4. NT Cells+SEQ2 Cy5

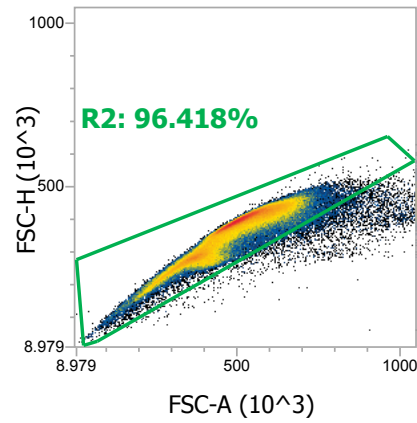

R2 - 4. NT Cells+SEQ2 Cy5

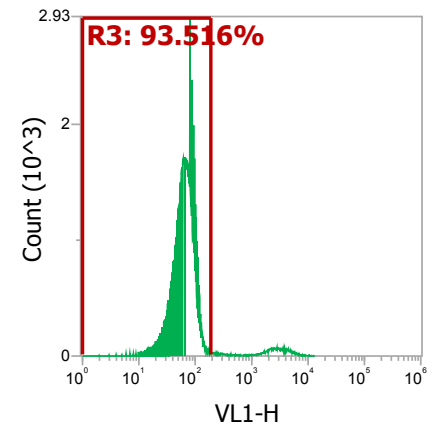

R3 - 4. NT Cells+SEQ2 Cy5

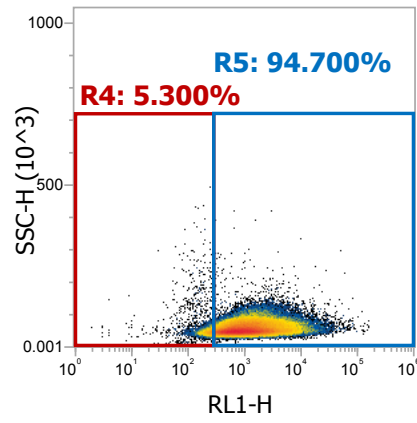

Experiment: **20210917**  
Sample: **4. NT Cells+SEQ2 Cy5**  
Time Recorded: **11:37:03**

| Name         | Gate       | X Parameter | Y Parameter | Count   | %Total  | %Gated  |
|--------------|------------|-------------|-------------|---------|---------|---------|
| ▢ All Events | All Events | N/A         | N/A         | 118,198 | 100.000 | 100.000 |
| ▢ R1         | R1         | FSC - FSC-H | SSC - SSC-A | 114,058 | 96.497  | 96.497  |
| ▢ R2         | R2         | FSC - FSC-A | FSC - FSC-H | 109,972 | 93.040  | 96.418  |
| ▢ R3         | R3         | VL1 - VL1-H |             | 102,841 | 87.007  | 93.516  |
| ▢ R4         | R4         | RL1 - RL1-H | SSC - SSC-H | 5,451   | 4.612   | 5.300   |
| ▢ R5         | R5         | RL1 - RL1-H | SSC - SSC-H | 97,390  | 82.396  | 94.700  |
