# Supplementary material for: A retrotransposon-derived DNA zip code internalizes myeloma cells through Clathrin-Rab5a-mediated endocytosis
Source: Frontiers journal article supplement (doi:10.3389/fonc.2024.1288724), 2024-02-23
Supplement: Data_Sheet_1.ZIP [file Data_Sheet_1.ZIP]

All Events - 2. Trypsin Cells+SEQ2 Cy5

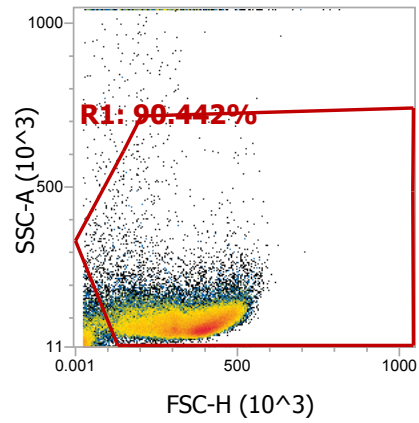

R1 - 2. Trypsin Cells+SEQ2 Cy5

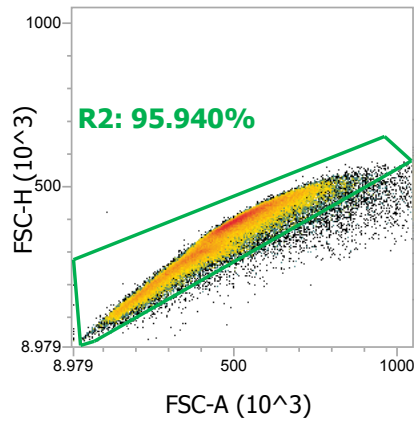

R2 - 2. Trypsin Cells+SEQ2 Cy5

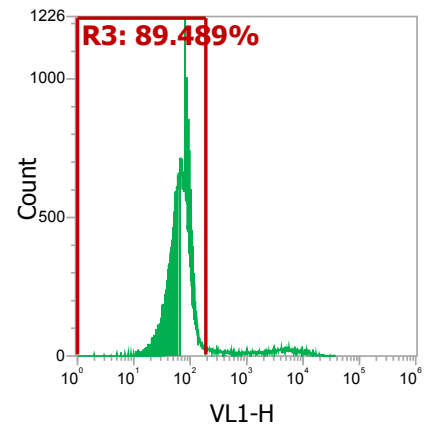

R3 - 2. Trypsin Cells+SEQ2 Cy5

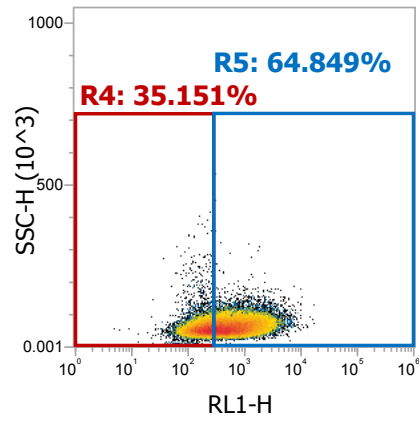

Experiment: **20210901**  
Sample: **2. Trypsin Cells+SEQ2 Cy5**  
Time Recorded: **19:06:02**

| Name         | Gate       | X Parameter | Y Parameter | Count  | %Total  | %Gated  |
|--------------|------------|-------------|-------------|--------|---------|---------|
| △ All Events | All Events | N/A         | N/A         | 54,978 | 100.000 | 100.000 |
| △ R1         | R1         | FSC - FSC-H | SSC - SSC-A | 49,723 | 90.442  | 90.442  |
| △ R2         | R2         | FSC - FSC-A | FSC - FSC-H | 47,704 | 86.769  | 95.940  |
| △ R3         | R3         | VL1 - VL1-H |             | 42,690 | 77.649  | 89.489  |
| R4           | R4         | RL1 - RL1-H | SSC - SSC-H | 15,006 | 27.295  | 35.151  |
| R5           | R5         | RL1 - RL1-H | SSC - SSC-H | 27,684 | 50.355  | 64.849  |

All Events - 3. Trypsin Cells+SEQ2 Cy5

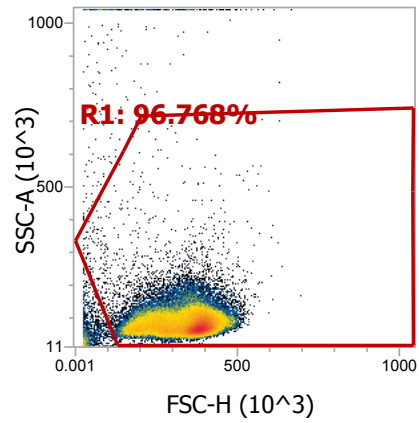

R1 - 3. Trypsin Cells+SEQ2 Cy5

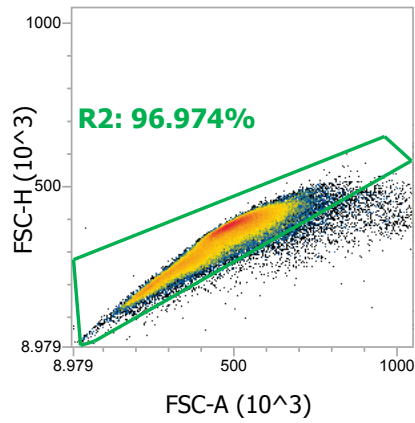

R2 - 3. Trypsin Cells+SEQ2 Cy5

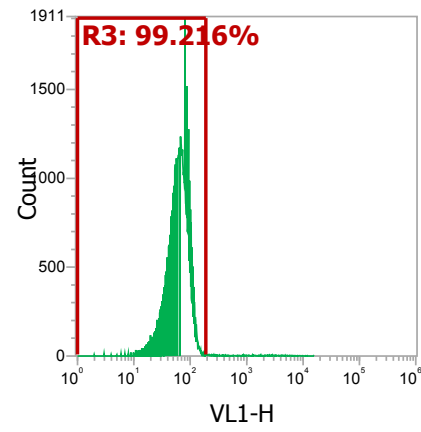

R3 - 3. Trypsin Cells+SEQ2 Cy5

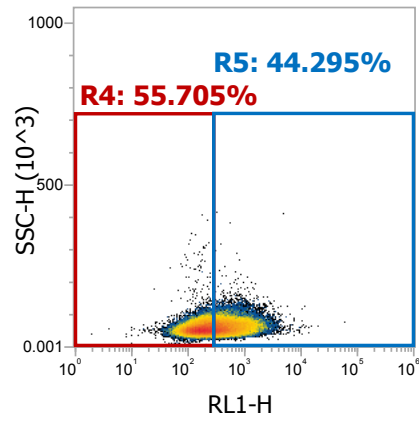

Experiment: **20210908**  
Sample: **3. Trypsin Cells+SEQ2 Cy5**  
Time Recorded: **17:47:33**

| Name         | Gate       | X Parameter | Y Parameter | Count  | %Total  | %Gated  |
|--------------|------------|-------------|-------------|--------|---------|---------|
| △ All Events | All Events | N/A         | N/A         | 74,111 | 100.000 | 100.000 |
| △ R1         | R1         | FSC - FSC-H | SSC - SSC-A | 71,716 | 96.768  | 96.768  |
| △ R2         | R2         | FSC - FSC-A | FSC - FSC-H | 69,546 | 93.840  | 96.974  |
| △ R3         | R3         | VL1 - VL1-H |             | 69,001 | 93.105  | 99.216  |
| R4           | R4         | RL1 - RL1-H | SSC - SSC-H | 38,437 | 51.864  | 55.705  |
| R5           | R5         | RL1 - RL1-H | SSC - SSC-H | 30,564 | 41.241  | 44.295  |

All Events - 4. Trypsin Cells+SEQ2 Cy5

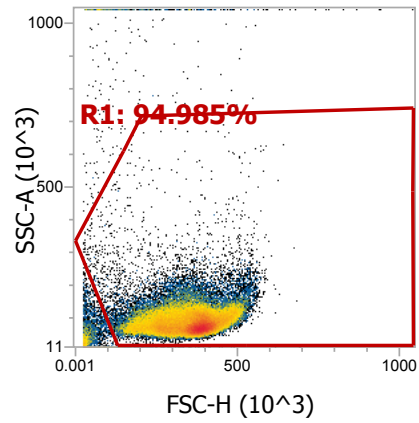

R1 - 4. Trypsin Cells+SEQ2 Cy5

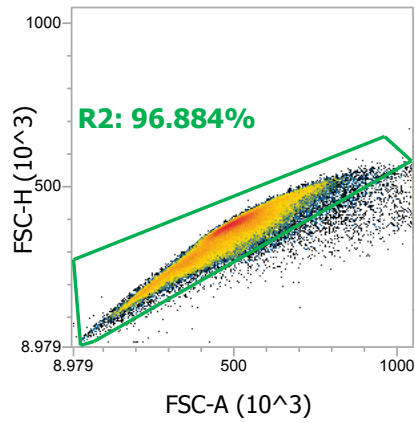

R2 - 4. Trypsin Cells+SEQ2 Cy5

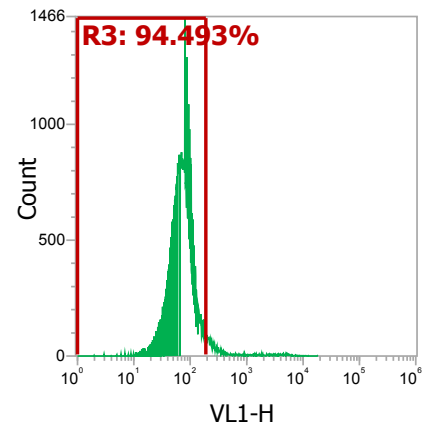

R3 - 4. Trypsin Cells+SEQ2 Cy5

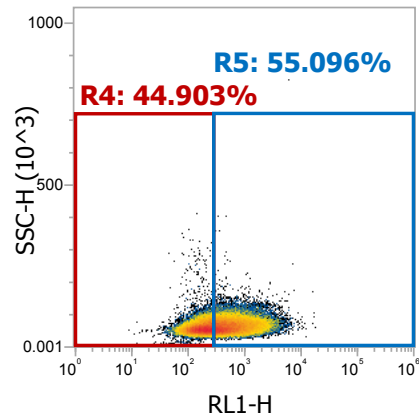

Experiment: **20210917**  
Sample: **4. Trypsin Cells+SEQ2 Cy5**  
Time Recorded: **15:15:44**

| Name       | Gate       | X Parameter | Y Parameter | Count  | %Total  | %Gated  |
|------------|------------|-------------|-------------|--------|---------|---------|
| All Events | All Events | N/A         | N/A         | 66,147 | 100.000 | 100.000 |
| R1         | R1         | FSC - FSC-H | SSC - SSC-A | 62,830 | 94.985  | 94.985  |
| R2         | R2         | FSC - FSC-A | FSC - FSC-H | 60,872 | 92.025  | 96.884  |
| R3         | R3         | VL1 - VL1-H |             | 57,520 | 86.958  | 94.493  |
| R4         | R4         | RL1 - RL1-H | SSC - SSC-H | 25,828 | 39.046  | 44.903  |
| R5         | R5         | RL1 - RL1-H | SSC - SSC-H | 31,691 | 47.910  | 55.096  |
