# Supplementary material for: A retrotransposon-derived DNA zip code internalizes myeloma cells through Clathrin-Rab5a-mediated endocytosis
Source: Frontiers journal article supplement (doi:10.3389/fonc.2024.1288724), 2024-02-23
Supplement: Data_Sheet_1.ZIP [file Data_Sheet_1.ZIP]

## Sheet: AVE- SD
Protein	Syntaxing							Clathrin							Clathrin							RCAS
DNA	CONTROL			ZIP2				CONTROL			ZIP2				CONTROL			ZIP2				CONTROL			ZIP2
Time	2 hrs	4 hrs	8 hrs	2 hrs	4 hrs	8 hrs		2 hrs	4 hrs	8 hrs	2 hrs	4 hrs	8 hrs		2 hrs	4 hrs	8 hrs	2 hrs	4 hrs	8 hrs		2 hrs	4 hrs	8 hrs	2 hrs	4 hrs	8 hrs
Average	0.0522322	0.104238	0.0423841	0.0627724	0.096795	0.205333		0.036899	0.0752272	0.0652681	0.116654	0.212222	0.123669		0.0708449	0.0432193	0.0193615	0.0618997	0.035343	0.229772		0.0608808	0.0751915	0.14979	0.119918	0.111245	0.184179
SD	0.25549	0.438624	0.422578	0.320506	0.420757	0.770779		0.226453	0.226864	0.257694	0.47174	0.580941	0.44757		0.335624	0.204048	0.103397	0.256961	0.144761	0.736272		0.191557	0.213133	0.35917	0.388428	0.31124	0.610806

## Sheet: ALL DATA
Protein	Syntaxing							Clathrin							Clathrin							RCAS
DNA	CONTROL			ZIP2				CONTROL			ZIP2				CONTROL			ZIP2				CONTROL			ZIP2
Time	2 hrs	4 hrs	8 hrs	2 hrs	4 hrs	8 hrs		2 hrs	4 hrs	8 hrs	2 hrs	4 hrs	8 hrs		2 hrs	4 hrs	8 hrs	2 hrs	4 hrs	8 hrs		2 hrs	4 hrs	8 hrs	2 hrs	4 hrs	8 hrs
	0	0	0	0	0	0		0	0	0	0	0	0		0	0	0	0	0	0		0.007	0.007	0.01	0	0.01	0
	0	0	0	0	0	0		0	0	0	0	0	0		0	0	0	0	0	0		0.009	0.006	0.15	0.69	0.01	0.03
	0	0	0	0	0	0		0	0	0	0	0	0		0	0	0	0	0	0		0.005	0.004	0.03	0.86	0	0
	0	0	0	0	0	0		0	0	0	0	0	0		0	0	0	0	0	0		0.05	0.009	0.08	0.12	0.08	0.02
	0	0	0	0	0	0		0	0	0	0	0	0		0	0	0	0	0	0		0.003	0.002	0.01	0	0.13	0
	0	0	0	0	0	0		0	0	0	0	0	0		0	0	0	0	0	0		0.086	0	0.37	0	0.02	0.15
	0	0	0	0	0	0		0	0	0	0	0	0		0	0	0	0	0	0		0.004	0.003	0.02	0	0.02	0.06
	0	0	0	0	0	0		0	0	0	0	0	0		0	0	0	0	0	0		0.003	0.012	0.02	0.53	0.02	0.08
	0	0	0	0	0	0		0	0	0	0	0	0		0	0	0	0	0	0		0.023	0.002	0.02	0	0.05	0.12
	0	0	0	0	0	0		0	0	0	0	0	0		0	0	0	0	0	0		0.045	0.004	0.1	0.01	0	0.01
	0	0	0	0	0	0		0	0	0	0	0	0		0	0	0	0	0	0		0.006	0.002	0.02	0.01	0	0.01
	0	0	0	0	0	0		0	0	0	0	0	0		0	0	0	0	0	0		0.004	0.001	0.04	0	0	0.04
	0	0	0	0	0	0		0	0	0	0	0	0		0	0	0	0	0	0		0.026	0.04	0.2	7.87	0	0.02
	0	0	0	0	0	0		0	0	0	0	0	0		0	0	0	0	0	0		0.006	0.014	0.01	0.01	0.04	0.32
	0	0	0	0	0	0		0	0	0	0	0	0		0	0	0	0	0	0		0.023	0.022	0.01	0.08	0	0.01
	0	0	0	0	0	0		0	0	0	0	0	0		0	0	0	0	0	0		0.002	0.022	0.06	0.01	0	0.14
	0	0	0	0	0	0		0	0	0	0	0	0		0	0	0	0	0	0		0.006	0.001	0	0.03	0.01	0.01
	0	0	0	0	0	0		0	0	0	0	0	0		0	0	0	0	0	0		0.015	0.051	0	0.04	0	0.02
	0	0	0	0	0	0		0	0	0	0	0	0		0	0	0	0	0	0		0.009	0.019	0.08	0.01	0.01	0.01
	0	0	0	0	0	0		0	0	0	0	0	0		0	0	0	0	0	0		0.079	0.013	0.39	0.1	0.01	0
	0	0	0	0	0	0		0	0	0	0	0	0		0	0	0	0	0	0		0.003	0.001	0.01	0	0	0.01
	0	0	0	0	0	0		0	0	0	0	0	0		0	0	0	0	0	0		0.03	0.001	0.04	0.03	0.02	0
	0	0	0	0	0	0		0	0	0	0	0	0		0	0	0	0	0	0		0.003	0.002	0	0	0	0.01
	0	0	0	0	0	0		0	0	0	0	0	0		0	0	0	0	0	0		0.001	0.003	0.04	0	0	0.03
	0	0	0	0	0	0		0	0	0	0	0	0		0	0	0	0	0	0		0.237	0.003	0.09	0.01	0.01	0.29
	0	0	0	0	0	0		0	0	0	0	0	0		0	0	0	0	0	0		0.029	0.02	0.11	0	0	0
	0	0	0	0	0	0		0	0	0	0	0	0		0	0	0	0	0	0		0.059	0.001	0.03	0	2.64	0.02
	0	0	0	0	0	0		0	0	0	0	0	0		0	0	0	0	0	0		0.003	0.024	0.24	0.01	0.02	0.01
	0	0	0	0	0	0		0	0	0	0	0	0		0	0	0	0	0	0		0.037	0.01	0.11	0	0	0.01
	0	0	0	0	0	0		0	0	0	0	0	0		0	0	0	0	0	0		0.013	0.031	0.01	0	0.06	0.08
	0	0	0	0	0	0		0	0	0	0	0	0		0	0	0	0	0	0		0.002	0.005	0.03	0.12	0.05	1.82
	0	0	0	0	0	0		0	0	0	0	0	0		0	0	0	0	0	0		0.004	0.017	0	0	0.09	0.18
	0	0	0	0	0	0		0	0	0	0	0	0		0	0	0	0	0	0		0.003	0.028	0.1	0.01	0.03	0.03
	0	0	0	0	0	0		0	0	0	0	0	0		0	0	0	0	0	0		0.018	0.445	0	0	0	0.04
	0	0	0	0	0	0		0	0	0	0	0	0		0	0	0	0	0	0		0.001	0.036	0.04	0.01	0.02	0.06
	0	0	0	0	0	0		0	0	0	0	0	0		0	0	0	0	0	0		0.014	0.063	0.01	0.01	0.16	0.11
	0	0	0	0	0	0		0	0	0	0	0	0		0	0	0	0	0	0		0.004	0.011	0.01	0.01	0.08	0.11
	0	0	0	0	0	0		0	0	0	0	0	0		0	0	0	0	0	0		0.026	0.093	0.18	0.01	0.45	0.59
	0	0	0	0	0	0		0	0	0	0	0	0		0	0	0	0	0	0		0.003	0.011	0	0.01	0.2	0
	0	0	0	0	0	0		0	0	0	0	0	0		0	0	0	0	0	0		0.003	0.058	0.02	0.05	0.06	0.04
	0	0	0	0	0	0		0	0	0	0	0	0		0	0	0	0	0	0		0.018	0.003	0	0.03	0.06	0.01
	0	0	0	0	0	0		0	0	0	0	0	0		0	0	0	0	0	0		0.001	0.011	0.03	0.01	0.01	0.14
	0	0	0	0	0	0		0	0	0	0	0	0		0	0	0	0	0	0		0.008	0	0.13	0.21	0.08	0.19
	0	0	0	0	0	0		0	0	0	0	0	0		0	0	0	0	0	0		0.02	0.01	0.01	0	0.05	0
	0	0	0	0	0	0		0	0	0	0	0	0		0	0	0	0	0	0		0.127	0.005	0.07	0.13	0.02	0.16
	0	0	0	0	0	0		0	0	0	0	0	0		0	0	0	0	0	0		0.001	0.021	0	0.26	0.04	0.23
	0	0	0	0	0	0		0	0	0	0	0	0		0	0	0	0	0	0		0.01	0.07	0	0.06	0.15	2.17
	0	0	0	0	0	0		0	0	0	0	0	0		0	0	0	0	0	0		0.002	0.001	0.17	0.02	0.29	0.06
	0	0	0	0	0	0		0	0	0	0	0	0		0	0	0	0	0	0		0.003	0.004	0.08	0	1.16	0.12
	0	0	0	0	0	0		0	6.21e-05	0	0	0	0		0	0	0	0	0	0		0.029	0.002	0.14	0.74	0.13	0.01
	0	0	0	0	0	0		0	0.000124299	0	0	0	0		0	0	0	0	0	0		0.027	0.028	0.03	0	0.08	0.04
	0	0	0	0	0	0		0	0.0019903	0	0	0	0		0	0	0	0	0	0		0.003	0.134	0.09	0	1.26	0.27
	0	0	0	0	0	0		0	0.00453387	0	0	0	0		0	0	0	0	0	0		0.011	0.006	0.01	0.45	0.02	0.7
	0	0	0	0	0	0		0	0.0069813	0	0	0	0		0	0	0	0	6.21e-05	0		0.041	0.016	0.01	0	0.13	0.01
	0	0	0	0	0	0		0	0.00727437	0	0	0	0		0	0	0	0	0.00112198	0		0.003	0.01	0	0	0.01	0.19
	0	0	0	0	0	0		0	0.00916295	0	0	0	0		0	0	0	0	0.00186648	0		0.008	0.03	0.01	0.01	0.24	0.22
	0	0	0	0	0	0		0	0.0100271	0	0	0	0		0	0	0	0	0.00324343	0		0.01	0.145	0.08	0.01	0.1	1.44
	0	0	0	0	0	0		0	0.0100601	0	0	0	0		0	0	0	0	0.00399406	0		0.012	0.021	0	0.01	0.08	0.01
	0	0	0	0	0	0		0	0.0112932	0	0	0	0		0	0	0	0	0.00405032	0		0.361	0.423	0	0.17	0.06	0
	0	0	0	0	0	0		0	0.0117637	0	0	0	0		0	0	0	0	0.0046157	0		0.002	0.156	0.05	0.01	0.44	0.02
	0	0	0	0	0	0		0	0.0143323	0	0	0	0		0	0	0	0	0.00505793	0		0.606	0.21	0.01	0	0	0.02
	0	0	0	0	0	0		0	0.0145307	0	0	0	0		0	0	0	0	0.00536587	0		0.004	0.407	0.01	0.04	0.09	0.04
	0	0	0	0	0	0		0	0.0147296	0	0	0	0		0	0	0	0	0.00667017	0		0.05	0.019	0.26	0.37	0.2	0.01
	0	0	0	0	0	0		0	0.0161565	0	0	0	0		0	0	0	0	0.017179	0		0.007	0.004	0.03	0.04	0.1	0
	0	0	0	0	0	0		0	0.019323	0	0	0	0		0	0	0	0	0.0415585	0		1.17	0.006	0	0.02	0.07	0.02
	0	0	0	0	0	0		0	0.0202469	6.22e-05	0	0	0		0	0	0	0	0.0679941	0		0.073	0.22	0.01	0.01	0.01	0.02
	0	0	0	0	0	0		0	0.024516	6.26e-05	0	0	0		0	0	0	0	0.0909529	0		0.005	0.003	0.03	0.01	0.09	0.01
	0	0	0	0	0	0		0	0.0266163	0.00167284	0	0	0		0	0	0	0	0.111442	0		0.003	0.046	0	0.04	0.01	0.01
	0	0	0	0	0	0		0	0.0312566	0.00198886	0	0	0		0	0	0	0	0.112909	0		0.056	0.011	0	0	0.08	0.02
	0	0	0	0	0	0		0	0.0363641	0.00229651	0	0	0		0	0	0	0	0.131748	0		0.362	0.03	0.04	0.01	0.27	0.03
	0	0	0	0	0	0		0	0.0370749	0.00249257	0	0	0		0	0	0	0	0.13271	0		0.032	0.196	0	0	0.17	0.01
	0	0	0	0	0	0		0	0.0378058	0.00500465	0	0	0		0	0	0	0	0.138523	0		0.001	0.348	0	0.01	0.12	0.4
	0	0	0	0	0	0		0	0.0382674	0.00547686	0	0	0		0	0	0	0	0.158139	0		0.002	0.068	0	0.02	0.01	0.05
	0	0	0	0	0	0		0	0.0389206	0.00690453	0	0	0		0	0	0	0	0.178895	0		0.001	0.027	0.09	0.01	0.03	0
	0	0	0	0	0	0		0	0.0399593	0.00851683	0	0	0		0	0	0	0	0.219552	0		0.03	0.058	0.02	0.05	0.12	0.02
	0	0	0	0	0	0		0	0.0410171	0.0121658	0	0	0		0	0	0	0	0.425247	0		0.067	0.003	0	0	0.07	0.03
	0	0	0	0	0	0		0	0.0476244	0.0147263	0	0	0		0	0	0	0	0.887763	0		0.026	0.211	0.09	0.03	0.01	0
	0	0	0	0	0	0		0	0.0488537	0.0198766	0	0	0		0	0	0	0	1.3243	0		0.001	0.053	0	0.03	0.05	0.05
	0	0	0	0	0	0		0	0.055548	0.0238999	0	0	0		0	0	0	0	1.94378	0		0.002	0.096	0.01	0.01	0.01	0.04
	0	0	0	0	0	0		0	0.0606659	0.0246511	0	0	0		0	0	0	0	0	0		0.001	0.001	0.01	0.01	0.08	0.06
	0	0	0	0	0	0		0	0.0650934	0.0277398	0	0	0		0	0	0	0	0	0		0.021	0.048	0.06	0	0.1	0.01
	0	0	0	0	0	0		0	0.0715508	0.0297838	0	0	0		0	0	0	0	0	0		0.001	0.13	0	0.29	0.24	0.04
	0	0	0	0	0	0		0	0.0817743	0.0315317	0	0	0		0	0	0	0	0	0		0.003	0.115	0.22	0.05	0.02	0
	0	0	0	0	0	0		0	0.0875071	0.0352888	0	0	0		0	0	0	0	0	0		0.006	0.011	0.05	0	0.05	0.38
	0	0	0	0	0	0		0	0.0915628	0.0400889	0	0	0		0	0	0	0	0	0		0.047	0.001	0.05	0	0.08	0.05
	0	0	0	0	0	0		0	0.0936056	0.0407719	0	0	0		0	0	0	0	0	0		0.002	0.004	0.01	0.01	0.03	0.02
	0	0	0	0	0	0		0	0.113313	0.0627574	0	0	0		0	0	0	0	0	0		0.003	0.05	0.02	0.46	0.02	0
	0	0	0	0	0	0		0	0.120119	0.0748078	0	0	0		0	0	0	0	0	0		0.001	0.117	0.1	0.01	0.04	0.03
	0	0	0	0	0	0		0	0.120721	0.0837393	0	0	0		0	0	0	0	0	0		0	0.009	0.08	0	0.13	0.01
	0	0	0	0	0	0		0	0.134728	0.112516	0	0	0		0	0	0	0	0	0		0.033	0.007	0.01	0	0.23	0.4
	0	0	0	0	0	0		0	0.143365	0.132236	0	0	0		0	0	0	0	0	0		0.003	0.006	0.13	0	0.01	0.6
	0	0	0	0	0	0		0	0.143888	0.138999	0	0	0		0	0	0	0	0	0		0.086	0.005	0.54	0.11	0.11	0.06
	0	0	0	0	0	0		0	0.159542	0.152068	0	0	0		0	0	0	0	0	0		0.019	0.02	0.08	0.01	0.73	0.46
	0	0	0	0	0	0		0	0.164225	0.175885	0	0	0		0	0	0	0	0	0		0.015	0.016	0.01	0.03	0	3.52
	0	0	0	0	0	0		0	0.222167	0.22317	0	0	0		0	0	0	0	0	0		0.004	0.003	0.02	0.01	0.02	0.93
	0	0	0	0	0	0		0	0.223859	0.321846	0	0	0		0	0	0	0	0	0		0.012	0.018	0.13	0.03	0.32	0.03
	0	0	0	0	0	0		0	0.252536	0.377151	0	0	0		0	0	0	0	0	0		0.007	0.008	0.7	0.04	0.01	0
	0	0	0	0	0	0		0	0.267002	0.496456	0	0	0		0.000312157	0	0	0	0	0		0.002	0	0.02	2.07	0.13	0.02
	0	0	0	0	0	0		0	0.270836	0.797926	0	0	0		0.000437029	0	0	0	0	0		0.003	0.068	0.01	0.99	0.18	0
	0	0	0	0	0	0		0	0.279022	0	0	0	0		0.000560642	0	0	0	0	0		0.03	0.063	0.58	0.19	0.11	0.03
	0	0	0	0	0	0		0	0.317663	0	0	0	0		0.000681656	0	0	0	0	0		0.059	0.028	0.02	0.04	0.04	0
	0	0	0	0	0	0		0	0.41262	0	0	0	0		0.00137299	0	0	0	0	0		0.002	0.106	0.28	0.15	0.01	0.03
	0	0	0	0	0	0		0	0.50387	0	0	0	0		0.00173828	0	0	0	0	0		0.034	0.068	0.03	0	0.13	0.03
	0	0	0	0	0	0		0	0.517386	0	0	0	0		0.00211798	0	0	0	0	0		0.002	0.016	0.12	0.03	0.22	0.6
	0	0	0	0	0	0		0	0.582162	0	0	0	0		0.00267912	0	0	0	0	0		0.01	0.14	0.24	0.1	0.41	0.01
	0	0	0	0	0	0		0	0.653166	0	0	0	0		0.00280173	0	0	0	0	0		0.021	0.032	0.22	0.08	0.06	0.01
	0	0	0	0	0	0		0	0.723961	0	0	0	0		0.00323423	0	0	0	0	0		0.181	0.006	0.41	0	0.11	0.77
	0	0	0	0	0	0		0	0.866088	0	0	0	0		0.00353533	0	0	0	0	0		0.005	0.364	0	0.05	1.15	0.02
	0	0	0	0	0	0		0	0.904669	0	0	0	0		0.00354862	0	0	0	0	0		0.002	0.085	0.03	0.01	0	0.01
	0	0	0	0	0	0		0	1.07174	0	0	0	0		0.00455494	0	0	0	0	0		0.022	1.432	0.01	0.01	0.1	0.74
	0	0	0	0	0	0		0	2.06511	0	0	0	0		0.00515271	0	0	0	0	0		0.015	0.05	0.33	0.1	0.41	0.04
	0	0	0	0	0	0		0	0	0	0	0	0		0.0056556	0	0	0	0	0		0.06	0.156	0.07	0	0	0.01
	0	0	0	0	0	0		0	0	0	0	0	0		0.00566854	0	0	0	0	0		0.011	0.037	0.03	0.65	0.03	0.07
	0	0	0	0	0	0		0	0	0	0	0	0		0.00572291	0	0	0	0	0		0.228	0.037	0.06	0.12	0.19	0
	0	0	0	0	0	0		0	0	0	0	0	0		0.0061658	0	0	0	0	0		0.007	0.027	0.16	0.05	0.15	0.14
	0	0	0	0	0	0		0	0	0	0	0	0		0.00804978	0	0	0	0	0		0.035	0.005	0.02	0.08	0.04	0.03
	0	0	0	0	0	0		0	0	0	0	0	0		0.00885943	0	0	0	0	0		0.128	0.003	0	0.02	0.06	0.05
	0	0	0	0	0	0		0	0	0	0	0	0		0.00916311	0	0	0	0	0		0.023	0.018	0.16	0.1	0.16	0.01
	0	0	0	0	0	0		0	0	0	0	0	0		0.00977135	0	0	0	0	0		0.001	0.025	0.05	0.01	0.06	0.49
	0	0	0	0	0	0		0	0	0	0	0	0		0.0135319	0	0	0	0	0		0.006	0	0	0.02	0.12	0
	0	0	0	0	0	0		0	0	0	0	0	0		0.0162541	0	0	0	0	0		0.045	0.022	0.03	0.01	0.27	0
	0	0	0	0	0	0		0	0	0	0	0	0		0.0187759	0	0	0	0	0		1.359	0.016	0.02	0.05	0.06	0.08
	0	0	0	0	0	0		0	0	0	0	0	0		0.0237009	0	0	0	0	0		0.005	0.004	0.01	0.1	0.01	0
	0	0	0	0	0	0		0	0	0	0	0	0		0.0270322	0	0	0	0	0		0.019	0.038	0.02	0.07	0.15	0.01
	0	0	0	0	0	0		0	0	0	6.24e-05	0	0		0.029936	6.22e-05	0	0	0	0		0.001	0.004	0	0.01	0.06	0.01
	0	0	0	0	0	0		0	0	0	6.24e-05	0	0		0.0326744	0.00012366	0	0	0	0		0.102	0.006	0.1	0.21	0.03	0.62
	0	0	0	0	0	0		0	0	0	0.000249618	0	0		0.0353313	0.000124163	0	0	0	0		0.009	0.01	0.25	0	0.11	0.02
	0	0	0	0	0	0		0	0	0	0.00037303	0	0		0.0448743	0.00018691	0	0	0	0		0.019	0.014	0.05	5.63	0	0.07
	0	0	0	0	0	0		0	0	0	0.000498652	0	0		0.0513631	0.000560516	0	0	0	0		0.003	0.001	0.27	0.41	0.02	0
	0	0	0	0	0	0		0	0	0	0.000767882	0	0		0.0532813	0.00105108	0	0	0	0		0.008	0.035	0.02	0.55	0	0.01
	0	0	0	0	0	0		0	0	0	0.000833232	0	0		0.0554917	0.00156196	0.000373476	0	0	0		0.033	0.025	0.04	0	0.1	0.03
	0	0	0	0	0	0		0	0	0	0.000929457	0	0		0.0614321	0.00261633	0.00243221	0	0	0		0	0.011	0.35	0.01	0.02	0.11
	0	0	0	0	0	0		0	0	0	0.00100006	0	0		0.0623069	0.00361303	0.00915833	0	0	0		0.008	0.005	0.11	0.06	0.01	3.11
	0	0	0	0	0	0		0	0	0	0.001307	0	0		0.0629508	0.00366208	0.01984	0	0	0		0.002	0.006	0.03	0	0.06	0.02
	0	0	0	0	0	0		0	0	0	0.00155456	0	0		0.0644886	0.00714007	0.0748844	0	0	0		0.004	0.052	0	0.05	0	0.17
	0	0	0	0	0	0		0	0	0	0.00155875	0	0		0.066169	0.0109606	0.33655	0	0	0		0.059	0.005	0.03	1.12	0.33	0.02
	0	0	0	0	0	0		0	0	0	0.00162269	0	0		0.0681818	0.0124062	0.668903	0	0	0		0.001	0.024	0.25	0.15	0.08	0.66
	0	0	0	0	0	0		0	0	0	0.00186881	0	0		0.0687051	0.0158154	0	0	0	0		0.016	0.011	0	0.01	0	0.06
	0	0	0	0	0	0		0	0	0	0.00192883	0	0		0.0728855	0.0167718	0	0	0	0		0.025	0.059	0.02	0.06	0.01	1.48
	0	0	0	0	0	0		0	0	0	0.00263055	0	0		0.0791938	0.018458	0	0	0	0		0.026	0.007	0.04	0	0	0.1
	0	0	0	0	0	0		0	0	0	0.00278619	0	0		0.0899951	0.0188349	0	0	0	0		0.166	0.034	0.16	0	0.02	0.01
	0	0	0	0	0	0		0	0	0	0.00330156	0	0		0.0901425	0.0189995	0	0	0	0		0.066	0.015	0.01	0.08	0.21	0.01
	0	0	0	0	0	0		0	0	0	0.00336985	0	0		0.0907312	0.0200122	0	0	0	0		0.032	0.023	0.02	0.1	0.04	0.04
	0	0	0	0	0	0		0	0	0	0.0034277	0	0		0.0981363	0.0263082	0	0	0	0		0.008	0.002	0	0.03	0.22	3.74
	0	0	0	0	0	0		0	0	0	0.00343225	0	0		0.111158	0.0275322	0	0	0	0		0.006	0.003	0	0.01	0.01	0.03
	0	0	0	0	0	0		0	0	0	0.00359419	0	0		0.113022	0.0309107	0	0	0	0		0.091	0.001	0	1.94	0.36	1.3
	0	0	0	0	0	0		0	0	0	0.00359918	0	0		0.125359	0.037536	0	0	0	0		0.033	0.018	0	0.03	0	0
	0	0	0	0	0	0		0	0	0	0.00361423	0	0		0.146044	0.0410769	0	0	0	0		0.003	0.046	0	0.02	0	0.01
	0	0	0	0	0	0		0	0	0	0.0045398	0	0		0.148779	0.0606625	0	0	0	0		0.264	0.029	0.02	0.03	0.12	0.86
	0	0	0	0	0	0		0	0	0	0.00472822	0	0		0.149375	0.0731811	0	0	0	0		0.001	0.001	0.06	0.41	0.03	0.02
	0	0	0	0	0	0		0	0	0	0.0047968	0	0		0.17143	0.0751244	0	0	0	0		0.019	0.04	0.93	0.04	0.68	5.36
	0	0	0	0	0	0		0	0	0	0.00503003	0	0		0.175298	0.0788061	0	0	0	0		0.011	0.05	0	0	0.01	0.02
	0	0	0	0	0	0		0	0	0	0.00555458	0	0		0.184735	0.0829991	0	0	0	0		0.069	0	0.01	0.02	0.04	0
	0	0	0	0	0	0		0	0	0	0.00602442	0	0		0.188265	0.0930471	0	0	0	0		1.088	0.005	0.04	0.03	0.03	0.01
	0	0	0	0	0	0		0	0	0	0.00616485	0	0		0.197788	0.0958546	0	0	0	0		0.026	0.007	0	0	0.02	0.55
	0	0	0	0	0	0		0	0	0	0.0069648	0	0		0.207251	0.101087	0	0	0	0		0.025	0.008	0.27	0	0	0
	0	0	0	0	0	0		0	0	0	0.00715181	0	0		0.218238	0.101495	0	0	0	0		0.055	0.01	0.02	0.01	0.02	0.07
	0	0	0	0	0	0		0	0	0	0.00735523	0	0		0.226813	0.120282	0	0	0	0		0.022	0.01	0.3	0.86	0.01	0.93
	0	0	0	0	0	0		0	0	0	0.00741665	0	0		0.273223	0.130371	0	0	0	0		0.036	0.028	0.03	0.01	0.05	0.06
	0	0	0	0	0	0		0	0	6.23e-05	0.00796198	0	0		0.28241	0.166383	0	0	0	0		0.001	0.019	0.03	0.02	0	0.89
	0	0	0	0	0	0		0	0	0.000374063	0.00837717	0	0		0.298848	0.184051	0	0	0	0		0.007	0.005	0.03	0	0.01	0
	0	0	0	0	0	0		0	0	0.00111949	0.00856368	0	0		0.329966	0.207746	0	0	0	0		0.08	0.071	0.01	0	0	0.06
	0	0	0	0	0	0		0	0	0.00210021	0.00861366	0	0		0.343871	0.258684	0	0	0	0		0.052	0.108	1.57	0.02	0.03	0
	0	0	0	0	0	0		0	0	0.00261717	0.00972723	0	0		0.345729	0.304474	0	0	0	0		0.003	0.163	0.08	0.08	0.05	0.48
	0	0	0	0	0	0		0	0	0.00339844	0.00986976	0	0		0.35394	0.367091	0	0	0	0		0.023	0.121	0.07	0.06	0.11	0.15
	0	0	0	0	0	0		0	0	0.00427509	0.0100781	0	0		0.393092	0.386183	0	0.000498708	0	0		0.007	0.083	0.49	0.75	0	0.23
	0	0	0	0	0	0		0	0	0.00542285	0.0103154	0	0		0.4021	0.478443	0	0.000749227	0	0		0.007	0.216	0.01	0.01	0.01	0.05
	0	0	0	0	0	0		0	0	0.00705281	0.01039	0	0		0.549016	0.561889	0	0.0012433	0	0		0.006	0.006	0.09	0.03	0.01	0.32
	0	0	0	0	0	0		0	0	0.00773661	0.0116913	0	0		0.781767	1.7058	0	0.0019898	0	0		0.055	0.007	0.02	0	0.01	0.02
	0	0	0	0	0	0		0	0	0.00791093	0.0119207	0	0		1.97455	2.89087	0	0.00286091	0	0		0.053	0.076	0.5	0.02	0.02	0.15
	0	0	0	0	0	0		0	0	0.00891611	0.0123938	0	0		0	0	0	0.00466101	0	0		0.062	0.02	0.01	0.22	0.81	0.04
	0	0	0	0	0	0		0	0	0.0137349	0.012842	0	0		0	0	0	0.00799167	0	0		0.323	0.005	0.04	0	0.13	0.03
	0	0	0	0	0	0		0	0	0.0159884	0.0133978	0	0		0	0	0	0.00961836	0	0		0.087	0.025	0.04	1.24	0.02	0.04
	0	0	0	0	0	0		0	0	0.0161867	0.0137663	0	0		0	0	0	0.010548	0	0		0.011	0.002	0.03	0	0.02	0.15
	0	0	0	0	0	0		0	0	0.0166941	0.0137794	0	0		0	0	0	0.011869	0	0		0.124	0.011	0	0.02	0.01	0.24
	0	0	0	0	0	0		0	0	0.0191783	0.0139288	0	0		0	0	0	0.012127	0	0		0.021	0.004	0	0.11	0.01	0.18
	0	0	0	0	0	0		0	0	0.0257127	0.0139714	0	0		0	0	0	0.0164807	0	0		0.042	0.044	0.02	0.05	0.03	0
	0	0	0	0	0	0		0	0	0.0275402	0.01566	0	0		0	0	0	0.0172322	0	0		0.113	0.079	0.02	0.01	0.25	0.61
	0	0	0	0	0	0		0	0	0.0294284	0.0182817	0	0		0	0	0	0.0177798	0	0		0.123	0.052	0.02	0	0.03	0
	0	0	0	0	0	0		0	0	0.0305506	0.0184677	0	0		0	0	0	0.0205413	0	0		0.002	0.012	0.8	0.01	2.41	0.19
	0	0	0	0	0	0		0	0	0.0329632	0.0186751	0	0		0	0	0	0.0233507	0	0		0.004	0.582	0.09	0.09	0.08	0.26
	0	0	0	0	0	0		0	0	0.0393783	0.0197366	0	0		0	0	0	0.0344641	0	0		0.072	0.015	0.2	0.13	0.29	0.28
	0	0	0	0	0	0		0	0	0.0449059	0.0216925	0	0		0	0	0	0.0380233	0	0		0.001	0.001	0.18	0.01	0	0.15
	0	0	0	0	0	0		0	0	0.0453184	0.0237411	0	0		0	0	0	0.0399791	0	0		0.11	0.02	0.14	0.05	0.01	0.02
	0	0	0	0	0	0		0	0	0.0479388	0.0237533	0	0		0	0	0	0.041275	0	0		0.002	0.009	0.02	0.03	0.01	0.02
	0	0	0	0	0	0		0	0	0.0487198	0.0251798	0	0		0	0	0	0.0516726	0	0		0.066	0.038	0.08	0.01	0.07	0.29
	0	0	0	0	0	0		0	0	0.0489521	0.0304342	0	0		0	0	0	0.0600482	0	0		0.034	0.118	0.04	0.14	0.15	0
	0	0	0	0	0	0		0	0	0.0602973	0.030994	0	0		0	0	0	0.0660003	0	0		0.003	0.017	0.04	0.02	0.01	0.01
	0	0	0	0	0	0		0	0	0.0612557	0.0319353	0	0		0	0	0	0.0876931	0	0		0.047	0.129	0.01	0.03	0.03	0.02
	0	0	0	0	0	0		0	0	0.0699721	0.0343161	0	0		0	0	0	0.100329	0	0		0.017	0.046	0.02	0	0.02	0
	0	0	0	0	0	0		0	0	0.096284	0.03519	0	0		0	0	0	0.110379	0	0		0.046	1.206	0	0.25	0.02	0.36
	0	0	0	0	0	0		0	0	0.0985759	0.0353092	0	0		0	0	0	0.110443	0	0		0.023	0.004	0.02	0.01	0.01	0.26
	0	0	0	0	0	0		0	0	0.11782	0.0362086	0	0		0	0	0	0.13286	0	0		0.054	0.013	0	0.13	0.01	0.02
	0	0	0	0	0	0		0	0	0.12814	0.0366701	0	0		0	0	0	0.251996	0	0		0.024	0.064	0	0.01	0.05	0.13
	0	0	0	0	0	0		0	0	0.133022	0.038137	0	0		0.000496852	0	0	0.320153	0	0		0.2	0.011	0.01	0.17	0.09	0.34
	0	0	0	0	0	0		0	0	0.143609	0.0385416	0	0		0.000935782	0	0	0.321914	0	0		0.19	0.001	0.04	0.01	0.01	0.45
	0	0	0	0	0	0		0	0	0.143839	0.0395465	0	0		0.00319437	0	0	0.332516	0	0		0.033	0.007	0	0.18	0.04	0.14
	0	0	0	0	0	0		0	0	0.148031	0.0400027	0	0		0.0148188	0	0	0.336902	0	0		0.025	0.005	0.03	0	0.01	0
	0	0	0	0	0	0		0	0	0.152681	0.0413788	0	0		0.0179593	0	0	0	0	0		0.051	0.001	0.19	0.03	0.01	0.01
	0	0	0	0	0	0		0	0	0.155489	0.0417563	0	0		0.022278	0	0	0	0	0		0.237	0.029	0.25	0.05	0.04	0
	0	0	0	0	0	0		0	0	0.171531	0.0494788	0	0		0.0273452	0	0	0	0	0		0.035	0.006	0.02	0.42	0.01	0.14
	0	0	0	0	0	0		0	0	0.208332	0.0495648	0	0		0.0482538	0	0	0	0	0		0.131	0	0.04	0.01	0.01	0.04
	0	0	0	0	0	0		0	0	0.221008	0.0530608	0	0		0.125408	0	0	0	0	0		0.098	0.015	0.11	0.18	0	0.12
	0	0	0	0	0	0		0	0	0.240856	0.0547957	0	0		0.261761	0	0	0	0	0		0.012	0.009	0.04	0.01	0	1.21
	0	0	0	0	0	0		0	0	0.24821	0.0580801	0	0		0.338461	0	0	0	0	0		0.031	0.002	0.02	0.04	0	0.01
	0	0	0	0	0	0		0	0	0.257534	0.0582922	0	0		0.39274	0	0	0	0	0		0.22	0.01	0.11	0.01	0.02	0.05
	0	0	0	0	0	0		0	0	0.272609	0.061843	0	0		0.546284	0	0	0	0	0		0.105	0.032	0.07	0.01	0.17	0
	0	0	0	0	0	0		0	0	0.277764	0.0626998	0	0		4.71782	0	0	0	0	0		0.05	0.005	0	0.06	0.02	0.02
	0	0	0	0	0	0		0	0	0.295469	0.0658446	0	0		0	0	0	0	0	0		0.273	0.002	0.06	0.06	0	0.03
	0	0	0	0	0	0		0	0	0.323482	0.0704369	0	0		0	0	0	0	0	0		0.683	0.005	0	0.01	0.03	0.01
	0	0	0	0	0	0		0	0	0.363164	0.0707172	0	0		0	0	0	0	0	0		0.068	0	0.1	0.01	0.03	0
	0	0	0	0	0	0		0	0	0.370648	0.0716486	0	0		0	0	0	0	0	0		0.018	0.002	0.25	0.02	0	0.01
	0	0	0	0	0	0		0	0	0.419219	0.0728702	0	0		0	0	0	0	0	0		0.01	0	0	0.01	0.02	0
	0	0	0	0	0	0		0	0	0.42388	0.0786184	0	0		0	0	0	0	0	0		0.005	0.039	0.03	0.17	0.07	0.01
	0	0	0	0	0	0		0	0	0.53148	0.0842462	0	0		0	0	0	0	0	0		0.146	0.161	0.01	0.06	0.03	0.01
	0	0	0	0	0	0		0	0	0.553718	0.0941964	0	0		0	0	0	0	0	0		0.054	0	0.01	0.15	0.02	0
	0	0	0	0	0	0		0	0	0.572586	0.102048	0	0		0	0	0	0	0	0		0.113	0.058	0.22	0.01	0.01	0
	0	0	0	0	0	0		0	0	0.59593	0.104571	0	0		0	0	0	0	0	0		0.011	0.05	0.03	0	0.05	0.66
	0	0	0	0	0	0		0	0	0.596488	0.127443	0	0		0	0	0	0	0	0		0.029	0.018	0.07	0.35	0.04	0
	0	0	0	0	0	0		0	0	0.712778	0.130258	0	0		0	0	0	0	0	0		0.079	0.038	0.13	0.09	0	0.71
	0	0	0	0	0	0		0	0	0.722587	0.130617	0	0		0	0	0	0	0	0		0.036	0.094	0.31	0.04	0.01	0
	0	0	0	0	0	0		0	0	0.77595	0.130772	0	0		0	0	0	0	0	0		0.004	0.001	0.01	0.12	0	0
	0	0	0	0	0	0		0	0	1.24215	0.165139	0	0		0	0	0	0	0	0		0.112	0.038	0.27	0.06	0.01	0.31
	0	0	0	0	0	0		0	0	1.82423	0.17481	0	0		0	0	0	0	0	0		0.041	0.065	0.02	0.06	0	0.33
	0	0	0	0	0	0		0	0	3.34913	0.175635	0	0		0	0	0	0	0	0		0.029	0.012	0	0	0.01	0.38
	0	0	0	0	0	0		0	0	0	0.176914	0	0		0	0	0	0	0	0		0.028	0.365	0.01	0.04	0.01	0
	0	0	0	0	0	0		0	0	0	0.182467	0	0		0	0	0	0	0	0		0.042	0.002	0.21	0.04	0.02	0.04
	0	0	0	0	0	0		0	0	0	0.194637	0	0		0	0	0	0	0	0		0.023	0.098	0.06	0.05	0.01	0.47
	0	0	0	0	0	0		0	0	0	0.195365	0	0		0	0	0	0	0	0		0.021	0.052	0.01	0.05	0.05	1.97
	0	0	0	0	0	0		0	0	0	0.197297	0	0		0	0	0	0	0	0		0.095	0.002	0.29	0.2	0	0
	0	0	0	0	0	0		0	0	0	0.197493	0	0		0	0	0	0	0	0		0.034	0.006	0.02	0.25	0.03	0.07
	0	0	0	0	0	0		0	0	0	0.202079	0	0		0	0	6.23e-06	0	0	0		0.006	0.264	0.14	0.04	0	0.01
	0	0	0	0	0	0		0	0	0	0.203027	0	0		0	0	6.19e-05	0	0	0		0.177	0.009	0	0.14	0	0.02
	0	0	0	0	0	0		0	0	0	0.211146	0	0		0	0	0.00012225	0	0	0		0.016	0.098	0	0.03	0.02	0.02
	0	0	0	0	0	0		0	0	0	0.217601	0	0		0	0	0.000436381	0	0	0		0.002	0.001	0.31	0.01	0.01	0
	0	0	0	0	0	0		0	0	0	0.241224	0	0		0	0	0.000936844	0	0	0		0.002	0.005	0.01	0.01	0	0.05
	0	0	0	0	0	0		0	0	0	0.243361	0	0		0	0	0.00208432	0	0	0		0.088	0.071	0.04	0.04	0.02	0
	0	0	0	0	0	0		0	6.21e-05	0	0.263915	0	0		0	0	0.00342127	0	0	0		0.071	0.002	0	0.02	0.01	0
	0	0	0	0	0	0		0	6.22e-05	0	0.28192	0	0		0	0	0.00446512	0	0	0		0.003	0.421	0.01	0.01	0	0.01
	0	0	0	0	0	0		0	6.22e-05	0	0.331473	0	0		0	0	0.00555706	0	0	0		0.037	0.02	0.01	0.04	0	0
	0	0	0	0	0	0		0	0.000124392	0	0.351422	0	0		0	0	0.00975057	0	0	0		0.103	0.058	0.04	0	0	0.57
	0	0	0	0	0	0		0	0.000124511	0	0.361216	0	0		0	0	0.0101811	0	0	0		0.109	0.116	0	0	0.01	0.01
	0	0	0	0	0	0		0	0.000124834	0	0.36449	0	0		0	0	0.0105095	0	0	0		0.148	0.055	0.01	0.42	0	0.44
	0	0	0	0	0	0		0	0.000124861	0	0.3741	0	0		0.00309793	0	0.0124216	0	0	0		0.064	0.008	0.01	0.01	0.01	0
	0	0	0	0	0	0		0	0.000186877	0	0.37449	0	0		0.00455185	0	0.0126424	0	0	0		0.118	0.109	0.1	0.08	0.04	0.01
	0	0	0	0	0	0		0	0.000248636	0	0.377001	0	0		0.00808852	0	0.023546	0	0	0		0.002	0.031	0.01	0.02	0.08	0.02
	0	0	0	0	0	0		0	0.000372953	0	0.393715	0	0		0.0257499	0	0.0277934	0	0	0		0.046	0.025	0.01	0.18	0.01	0.01
	0	0	0	0	0	0		0	0.000374274	0	0.398196	0	0		0.02645	0	0.0317335	0	0	0		0.004	0.003	0.09	0.1	0.01	0.84
	0	0	0	0	0	0		0	0.000871672	0	0.398293	0	0		0.0399925	0	0.0456716	0	0	0		0.002	0.053	0.43	0.01	0.11	0.12
	0	0	0	0	0	0		0	0.000937555	0	0.400744	0	0		0.0630982	0	0.0494231	0	0	0		0.009	0.062	0	0.16	0.01	0.13
	0	0	0	0	0	0		0	0.00105902	0	0.422854	0	0		0.0911515	0	0.0551431	0	0	0		0.004	0.147	0	0.01	0.24	0.04
	0	0	0	0	0	0		0	0.00124816	0	0.451263	0	0		0.165974	0	0.0776695	0	0	0		0.017	0.035	0.02	0.05	0.12	0
	0	0	0	0	0	0		0	0.00131116	0	0.456401	0	0		0.254833	0	0.0791269	0	0	0		0.234	0.432	0.01	0.01	0	0
	0	0	0	0	0	0		0	0.00148933	0	0.466212	0	0		0.632453	0	0.0804835	0	0	0		0.02	0.004	0.01	0	0	0.08
	0	0	0	0	0	0		0	0.00150067	0	0.479625	0	0			0	0.085275	0	0	0		0.019	0.003	0.01	0.01	0.46	0.01
	0	0	0	0	0	0		0	0.00304891	0	0.498273	0	0			0	0.0865395	0	0	0		0.009	0.097	0.55	0.02	0.05	0
	0	0	0	0	0	0		0	0.00336846	0	0.519544	0	0			0	0.215512	0	0	0		0.015	0.019	0.09	0.02	0.04	0.12
	0	0	0	0	0	0		0	0.00343398	0	0.529745	0	0			0	0.221598	0	0	0		0.031	0.029	0.17	0.29	0.03	0.01
	0	0	0	0	0	0		0	0.00379458	0	0.588567	0	0			0	0.299165	0	0	0		0.013	0.041	0	0.01	0.27	0
	0	0	0	0	0	0		0	0.00464938	0	0.639205	0	0			0	0.656162	0	0	0		0.024	0.001	0.11	0.01	0.01	0.01
	0	0	0	0	0	0		0	0.00467677	0	0.639282	0	0			0	0.920576	0	0	0		0.015	0.12	0.01	0.07	0	0
	0	0	0	0	0	0		0	0.00495558	0	0.6488	0	0			0	0	0	0	0		0.028	0.151	0.09	0	0.87	0.02
	0	0	0	0	0	0		0	0.0055011	0	0.722268	0	0			0	0	0	0.00031082	0		0.008	0.021	0.09	0.1	0.05	0.07
	0	0	0	0	0	0		0	0.00565646	0	0.75735	0	0			0	0	0	0.000372912	0		0.001	0.012	0.19	0.25	0.04	0.01
	0	0	0	0	0	0		0	0.00611501	0	0.774502	0	0			0	0	0	0.000438425	0		0.006	0.003	0	0	0.22	4.35
	0	0	0	0	0	0		0	0.00648864	0	0.809046	0	0			0	0	0	0.000681656	0		0.002	0.007	0.01	0.04	0.02	0
	0	0	0	0	0	0		0	0.00661822	0	0.823179	0	0			0	0	0	0.00076215	0		0.014	0.003	0.5	0.13	0.01	0.02
	0	0	0	0	0	0		0	0.00688572	0	0.859579	0	0			0	0	0	0.000870877	0		0.022	0.008	0.01	0	0.04	0.02
	0	0	0	0	0	0		0	0.00734066	0.0013717	0.981661	0	0			0	0	0	0.000939521	0		0.181	0.053	0.13	0	0.01	0
	0	0	0	0	0	0		0	0.00748395	0.00392987	1.14711	0	0			0	0	0	0.00130698	0		0.832	0	0.06	0	0.01	0.1
	0	0	0	0	0	0		0	0.00841809	0.0159234	1.1754	0	0			0	0	0	0.00367799	0		0.062	0.015	0.01	0.1	0.01	0.02
	0	0	0	0	0	0		0	0.00886591	0.0159726	1.20493	0	0			0	0	0	0.00368033	0		0.014	0.055	2.41	0.01	0.12	0.01
	0	0	0	0	0	0		0	0.00903437	0.019981	1.28953	0	0			0	0	0	0.00501169	0		0.025	0.648	0.09	0	0.04	0
	0	0	0	0	0	0		0	0.0100762	0.205171	1.48141	0	0			0	0	0	0.00503338	0		0.063	0.042	0	0.01	0.09	0.18
	0	0	0	0	0	0		0	0.0101744	0.246973	1.56275	0	0			0	0	0	0.00504841	0		0.074	0.007	0.84	0.02	0.02	0
	0	0	0	0	0	0		0	0.0106587	0.28748	1.77887	0	0			0	0	0	0.00572031	0		0.073	0.01	0.08	0.02	0.04	0
	0	0	0	0	0	0		0	0.0112731	1.7282	1.85549	0	0			0	0	0	0.00659351	0		0.001	0.016	0.03	0.03	0.08	0.01
	0	0	0	0	0	0		0	0.0112937	2.05191	2.11626	0	0			0	0	0	0.00666541	0		0.008	0.029	0.09	0.01	0.07	0.54
	0	0	0	0	0	0		0	0.011485	0	2.16599	0	0			0	0	0	0.00669162	0		0.008	0.155	0.1	1.23	0.07	0.01
	0	0	0	0	0	0		0	0.0116142	0	2.53833	0	0			0	0	0	0.00784484	0		0.008	0.022	0	0.01	0.35	0
	0	0	0	0	0	0		0	0.0116214	0	3.35216	0	0			0	0	0	0.00809473	0		0.012	0.901	0	0.01	0.05	0.02
	0	0	0	0	0	0		0	0.0118525	0	4.0071	0	0			0	0	0	0.00870213	0		0.005	0.311	0.01	1.05	0.06	0.01
	0	0	0	0	0	0		0	0.0120545	0	4.37592	0	0			0	0	0	0.00922799	0		0.009	0.048	0.27	0.22	0.1	0
	0	0	0	0	0	0		0	0.0138918	0	6.92666	0	0			0	0	0	0.0110372	0		0.026	0.024	0.04	0	0.06	0.03
	0	0	0	0	0	0		0	0.014405	0	0	0	0			0	0	0	0.0129453	0		0.011	0.002	0.14	1.74	0.04	0.03
	0	0	0	0	0	0		0	0.0149505	0	0	0	0			0	0	0	0.0148733	0		0.011	0.014	0.04	0.31	0	0.11
	0	0	0	0	0	0		0	0.0156756	0	0	0	0			0	0	0	0.016197	0		0.002	0.084	0.04	0	0	0
	0	0	0	0	0	0		0	0.0174761	0	0	0	0			0	0	0	0.021069	0		0.012	0.007	0	0.01	0.06	0.02
	0	0	0	0	0	0		0	0.017537	0	0	0	0			0	0	0	0.0259383	0		0.002	0.03	0	0.01	0.07	0.03
	0	0	0	0	0	0		0	0.0178938	0	0	0	0			0	0	0	0.0313939	0		0.003	0.003	0	0	0	0.42
	0	0	0	0	0	0		0	0.0181975	0	0	0	0			0	0	0	0.0360813	0		0.008	0.385	0.01	0.23	0.07	0.01
	0	0	0	0	0	0		0	0.0190443	0	0	0	0			0	0	0	0.0432933	0		0.011	0.037	0.04	0	0.14	0.06
	0	0	0	0	0	0		0	0.0205742	0	0	0	0			0	0	0	0.0518977	0		0.002	0.13	0.02	0	0.1	0.02
	0	0	0	0	0	0		0	0.0219047	0	0	0	0			0	0	0	0.0523413	0		0.029	0.087	0.14	0.01	0.01	0.03
	0	0	0	0	0	0		0	0.0270752	0	0	0	0			0	0	0	0.0529326	0		0.005	0.007	0.12	0.02	0.01	0
	0	0	0	0	0	0		0	0.0324484	0	0	0	0			0	0	0	0.0595795	0		0.002	0.005	0.03	0.14	0	0.33
	0	0	0	0	0	0		0	0.0344201	0	0	0	0			0	0	0	0.0625453	0		0.022	0.028	0.2	0.27	0.02	0.07
	0	0	0	0	0	0		0	0.0344235	0	0	0	0			0	0	0	0.0813824	0		0.033	0.004	0.04	0.01	0.05	0.01
	0	0	0	0	0	0		0	0.0363421	0	0	0	0			0	0	0	0.0870023	0		0.005	0.037	0.05	0.06	0.01	0
	0	0	0	0	0	0		0	0.0363893	0	0	0	0			0	0	0	0.0881386	0		0.025	0.004	0.03	0.11	0.01	0.1
	0	0	0	0	0	0		0	0.0368254	0	0	0	0			0.000807385	0	0	0.0962711	0		0.021	0.089	0.01	0.02	0	0.11
	0	0	0	0	0	0		0	0.0370135	0	0	0	0			0.00367567	0	0	0.10265	0		0.01	0.03	0.2	0	0.01	0.01
	0	0	0	0	0	0		0	0.0388765	0	0	0	0			0.0039245	0	0	0.124094	0		0.001	0.246	0.01	0	0.61	0.03
	0	0	0	0	0	0		0	0.0394241	0	0	0	0			0.00574111	0	0	0.155128	0		0.01	0.003	0	0.01	0.04	0.05
	0	0	0	0	0	0		0	0.0417546	0	0	0	0			0.00869715	0	0	0.165541	0		0.001	0.004	0.01	0.59	0.08	0.02
	0	0	0	0	0	0		0	0.0423021	0	0	0	0			0.00880873	0	0	0.176303	0		0.015	0.011	0.01	0.1	0.03	0.63
	0	0	0	0	0	0		0	0.0438058	0	0	0	0			0.0089117	0	0	0.230025	0		0.007	0.002	0.1	0.01	0.03	0.09
	0	0	0	0	0	0		0	0.0438619	0	0	0	0			0.00900545	0	0	0.243674	0		0.008	0.014	0.03	0.4	0.03	0.08
	0	0	0	0	0	0		0	0.0461714	0	0	0	0			0.00965744	0	0	0.252146	0		0.04	0.068	0	0.28	0.05	0.04
	0	0	0	0	0	0		0	0.0464254	0	0	0	0			0.0167306	0	0	0.25257	0		0	0.002	0.09	0.01	0.12	0.02
	0	0	0	0	0	0		0	0.0476078	0	0	0	0			0.0169484	0	0	0.256736	0		0.002	0.005	0.04	0.01	0.22	0.02
	0	0	0	0	0	0		0	0.0476865	0	0	0	0			0.018102	0	0	0.272479	0		0.163	0.016	0.01	0.08	0	0.21
	0	0	0	0	0	0		0	0.0487382	0	0	0	0			0.0220509	0	0	0.365242	0		0.014	0.024	0.02	0.01	0.2	0
	0	0	0	0	0	0		0	0.0512135	0	0	0	0			0.029956	0	0	0.419464	0		0.003	0.009	0.1	0	0	0.01
	0	0	0	0	0	0		0	0.0550654	0	0	0	0			0.0312567	0	0	0.468675	0		0.017	0.002	0.02	0.2	0.02	0.4
	0	0	0	0	0	0		0	0.0573764	0	0	0	0			0.0319836	0	0	0.486775	0		0.113	0.133	0.01	0	0.01	0
	0	0	0	0	0	0		0	0.0590914	0	0	0	0			0.0322719	0	0	0.71051	0		0.026	0.003	0.03	0.07	0.02	0.11
	0	0	0	0	0	0		0	0.060316	0	0	0	0			0.0322954	0	0	1.49052	0		0.006	0.19	0.15	0.33	0	0.01
	0	0	0	0	0	0		0	0.0643698	0	0	0	0			0.0325175	0	0	0	0		0.002	0.022	0.06	0	0.04	0.32
	0	0	0	0	0	0		0	0.0663132	0	0	0	0			0.0326573	0	0	0	0		0.094	0.257	0	0.01	0.09	0
	0	0	0	0	0	0		0	0.0707128	0	0	0	0			0.0427882	0	0	0	0		0.001	0.016	0	0.1	0.01	0
	0	0	0	0	0	0		0	0.0824779	0	0	0	0			0.044375	0	0	0	0		0.065	0.053	0.01	0.09	0.03	0
	0	0	0	0	0	0		0	0.0829053	0	0	0	0			0.0578437	0	0	0	0		0.081	0.034	0.01	0.12	0.02	0
	0	0	0	0	0	0		0	0.0872912	0	0	0	0			0.0588119	0	0	0	0		0.019	0.015	0.01	0.07	0.18	0.01
	0	0	0	0	0	0		0	0.0880185	0	0	0	0			0.0593749	0	0	0	0		0.15	0.001	0.01	0.06	0.13	0.01
	0	0	0	0	0	0		0	0.089907	0	0	0	0			0.0653537	0	0	0	0		0.088	0.014	0.04	0	0.03	0.02
	0	0	0	0	0	0		0	0.0999038	0	0	0	0			0.0711629	0	0	0	0		0.002	0.044	0	0	0.01	0.22
	0	0	0	0	0	0		0	0.101845	0	0	0	0			0.07432	0	0	0	0		0.015	2.889	0.04	0.04	0.07	0.03
	0	0	0	0	0	0		0	0.112468	0	0	0	0			0.0799787	0	0	0	0		0.004	0.061	0.1	0	0.1	9.59
	0	0	0	0	0	0		0	0.113904	0	0	0	0			0.0927553	0	0	0	0		0.012	0.014	0	0	0.02	0.01
	0	0	0	0	0	0		0	0.114027	0	0	0	0			0.162486	0	0	0	0		0.003	0.01	0.36	0	0.09	0.3
	0	0	0	0	0	0		0	0.122856	0	0	0	0			0.267831	0	0	0	0		0.045	0.004	2.8	0.01	0.21	0.03
	0	0	0	0	0	0		0	0.134625	0	0	0	0			0.303998	0	0	0	0		0.012	0.002	0	0.07	0.05	0.01
	0	0	0	0	0	0		0	0.134835	0	0	0	0			0.323857	0	0	0	0		0.004	0.005	0	0.03	1.15	0.03
	0	0	0	0	0	0		0	0.135002	0	0	0	0			0.392984	0	0	0	0		0.033	0.001	0.05	0.02	0.03	0.11
	0	0	0	0	0	0		0	0.136768	0	0	0	0			0.420044	0	0	0	0		0.005	0.005	0.02	1.13	0.93	0.06
	0	0	0	0	0	0		0	0.145718	0	0	0	0			0.435525	0	0	0	0		0.002	0.047	0.04	0.05	0.02	0
	0	0	0	0	0	0		0	0.147051	0	0	0	0			0.634015	0	0	0	0		0.025	0.01	0	0.05	0.01	0.01
	0	0	0	0	0	0		0	0.149762	0	0	0	0			2.0121	0	0	0	0		0.025	0	0.04	0.09	0	0.02
	0	0	0	0	0	0		0	0.167373	0	0	0	0			0	0	0	0	0		0.007	0.003	0	0.01	0.01	0.03
	0	0	0	0	0	0		0	0.169679	0	0	0	0			0	0	0	0	0		0.002	0.016	0.06	0.03	0.05	0.34
	0	0	0	0	0	0		0	0.177246	0	0	0	0			0	0	0	0	0		0.026	0.065	0.04	0.01	0.14	0.57
	0	0	0	0	0	0		0	0.177447	0	0	0	0			0	0	0	0	0		0.033	0.003	1.08	0.28	0.02	0
	0	0	0	0	0	0		0	0.177958	0	0	0	0			0	0	0	0	0		0.004	0.005	0	0.1	0.07	0.01
	0	0	0	0	0	0		0	0.178619	0	0	0	0			0	0	0	0	0		0.047	0.008	0.09	0.06	0.09	0.11
	0	0	0	0	0	0		0	0.188822	0	0	0	0			0	0	0	0	0		0.003	0.002	0	0.04	0.39	0.02
	0	0	0	0	0	0		0	0.192173	0	0	0	0			0	0	0	0	0		0.147	0.013	0	0.03	0.08	0.19
	0	0	0	0	0	0		0	0.193716	0	0	0	0			0	0	0	0	0		0.299	0.019	0.03	0.02	0	0.2
	0	0	0	0	0	0		0	0.20755	0	0	0	0			0	0	0	0	0		0.057	0.02	0.08	0	0.17	0.04
	0	0	0	0	0	0		0	0.21455	0	0	0	0			0	0	0	0	0		0.017	0.013	0.82	0.03	0.02	0.18
	0	0	0	0	0	0		0	0.217819	0	0	0	0			0	0	0	0	0		0.004	0.031	0	0	0.08	0
	0	0	0	0	0	0		0	0.21825	0	0	0	0			0	0	0	0	0		0.008	0.004	0.01	0	0.18	0.01
	0	0	0	0	0	0		0	0.230785	0	0	0	0			0	0	0	0	0		0.006	0.007	0	3.36	0.01	0.05
	0	0	0	0	0	0		0	0.249024	0	0	0	0			0	0	0	0	0		0.004	0.003	0.01	0.1	0	1.13
	0	0	0	0	0	0		0	0.259677	0	0	0	0			0	0	0	0	0		0.058	0.009	0.04	0.04	0.02	0
	0	0	0	0	0	0		0	0.260815	0	0	0	0			0	0	0	0	0		0.006	0.004	0	0.1	0.02	0.51
	0	0	0	0	0	0		0	0.263283	0	0	0	0			0	0	0	0	0		2.613	0.002	0.02	0.01	0.01	0.06
	0	0	0	0	0	0		0	0.287605	0	0	0	0			0	0	0	0	0		0.009	0.013	0.02	0.02	0.23	0.09
	0	0	0	0	0	0		0	0.306869	0	0	0	0			0	0	0	0	0		0.004	0.005	0.03	0.17	0.02	0.01
	0	0	0	0	0	0		0	0.315535	0	0	0	0			0	0	0	0	0		0.001	0.001	0.02	0	0.09	4.7
	0	0	0	0	0	0		0	0.31945	0	0	0	0			0	0	0	0	0		0.018	0.502	0.01	0.14	0.06	0.1
	0	0	0	0	0	0		0	0.329691	0	0	0	0			0	0	0	0	0		0.036	0.001	0	0.06	0.04	0.12
	0	0	0	0	0	0		0	0.331155	0	0	0	0			0	0	0	0	0		0.002	0.004	0.21	0.01	0.12	0.01
	0	0	0	0	0	0		0	0.348465	0	0	0	0			0	0	0	0	0		0.102	1.088	0.01	0.05	0.1	0.24
	0	0	0	0	0	0		0	0.432851	0	0	0	0			0	0	0	0	0		0.009	0.543	0.08	0.02	0.09	0.05
	0	0	0	0	0	0		0	0.43343	0	0	0	0			0	0	0	0	0		0.028	0.153	0.07	0.31	0.92	0.02
	0	0	0	0	0	0		0	0.448295	0	0	0	0			0	0	0	0	0		0.012	0.009	0	0.05	0.09	0.06
	0	0	0	0	0	0		0	0.452402	0	0	0	0			0	0	0	0	0		0.016	0.002	0	0.18	0.01	0.01
	0	0	0	0	0	0		0	0.45387	0	0	0	0			0	0	0	0	0		0.005	0.008	0.01	0.01	0.09	0.01
	0	0	0	0	0	0		0	0.505873	0	0	0	0			0	0	0	0	0		0.018	0	0	0.02	0	0.06
	0	0	0	0	0	0		0	0.552313	0	0	0	0			0	0	0	0	0		0.002	1.034	0.02	0.05	0.08	0.01
	0	0	0	0	0	0		0	0.552997	0	0	0	0			0	0	0	0	0		0.129	0.01	0.01	0.05	0.03	0.15
	0	0	0	0	0	0		0	0.612947	0	0	0	0			0	0	0	0	0		0.003	0.789	0.02	0.18	0.05	0.66
	0	0	0	0	0	0		0	0.649642	0	0	0	0			0	0	0	0	0		0.005	0.049	0.02	0.21	0.06	0
	0	0	0	0	0	0		0	0.67768	0	0	0	0			0	0	0	0	0		0	0.038	0.4	0	0.08	1.09
	0	0	0	0	0	0		0	0.686803	0	0	0	0			0	0	0	0	0		0.022	0.464	0.15	0.01	0	0.35
	0	0	0	0	0	0		0	0.71562	0	0	0	0			0	0	0	0	0		0.007	0.031	0.01	0.04	0.06	0.11
	0	0	0	0	0	0		0	0.831982	0.000186448	0	0	0			0	0	0	0	0		0.005	0.008	0.04	0.05	0.06	0
	0	0	0	0	0	0		0	0.833656	0.000186881	0	0	0			0	0	0	0	0		0.014	0.014	0.5	0.01	0	0.47
	0	0	0	0	0	0		0	0.845464	0.00049848	0	0	0			0	0	0	0	0		0.005	0.197	0.04	0.08	0.01	0.62
	0	0	0	0	0	0		0	0.848868	0.000810085	0	0	0			0	0	0	0	0		0.005	0.001	0.01	0.06	0.72	0.01
	0	0	0	0	0	0		0	0.874077	0.00104945	0	0	0			0	0	0	0	0		0	0.89	0.01	0.24	0.01	0
	0	0	0	0	0	0		0	0.991105	0.00171829	0	0	0			0	0	0	0	0		0.007	0.098	0.01	0.02	0	0
	0	0	0	0	0	0		0	1.07547	0.00180378	0	0	0			0	0	0	0	3.92e-07		0.002	0.009	0.44	0.01	0.01	0
	0	0	0	0	0	0		0	1.25975	0.00347987	0	0	0			0	0	0	0	6.21e-05		0.014	0.175	0.06	0.05	0.62	0
	0	0	0	0	0	0		0	1.28037	0.00534116	0	0	0			0	0	0	0	6.23e-05		0.021	0.001	0	0	0.01	0.01
	0	0	0	0	0	0		0	1.37998	0.005993	0	0	0			0	0	0	0	6.24e-05		0.003	0.039	0	0.07	0.03	0.07
	0	0	0	0	0	0		0	1.7946	0.00657664	0	0	0			0	0	0	0	6.24e-05		0.009	0.007	0.01	0.03	0.02	0
	0	0	0	0	0	0		0	0	0.00723757	0	0	0			0	0	0	0	0.000123017		0.013	0.134	0.12	0.07	0	0.08
	0	0	0	0	0	0		0	0	0.00744333	0	0	0			0	0	0	0	0.00012463		0.942	0.003	0.09	0.01	0.01	0
	0	0	0	0	0	0		0	0	0.00755929	0	0	0			0	0	0	0	0.00012469		0.015	0.006	0.04	0	0.01	0.04
	0	0	0	0	0	0		0	0	0.00787226	0	0	0			0	0	0	0	0.000186204		0.158	0.078	0.06	0.09	0	0.09
	0	0	0	0	0	0		0	0	0.00899195	0	0	0			0	0	0	0	0.000187124		0.03	0.303	0.01	0.06	0.04	0
	0	0	0	0	0	0		0	0	0.00934213	0	0	0			0	0	0	0	0.00024963		0.002	0.032	0.1	0.35	0	0
	0	0	0	0	0	0		0	0	0.010184	0	0	0			0	0	0	0	0.000311724		0.008	0.035	0	0.02	0	0.19
	0	0	0	0	0	0		0	0	0.0115866	0	0	0			0	0	0	0	0.000372407		0.002	0.012	0.11	0.06	0	0
	0	0	0	0	0	0		0	0	0.0120492	0	0	0			0	0	0	0	0.000373432		0.069	0	0	0.01	0	0.23
	0	0	0	0	0	0		0	0	0.0138423	0.000124599	0	0			0	0	0	0	0.000431674		0	0.184	0.16	0.07	0.03	0.01
	0	0	0	0	0	0		0	0	0.0145895	0.000186661	0	0			0	0	0	0	0.000498052		0.017	0.058	0	0	0	0.28
	0	0	0	0	0	0		0	0	0.0147686	0.000249421	0	0			0	0	0	0	0.000498715		0.003	0.485	0.21	0.13	0	0
	0	0	0	0	0	0		0	0	0.0155982	0.000435421	0	0			0	0	0	0	0.000499233		0.024	0.525	0	0.04	0.02	0.05
	0	0	0	0	0	0		0	0	0.0166905	0.00074564	0	0			0	0	0	0	0.00056062		0.093	0	0.02	0.09	0	3.17
	0	0	0	0	0	0		0	0	0.019626	0.000748773	0	0			0	0	0	0	0.000561234		0.009	0.006	0.07	0.04	0.11	0.01
	0	0	0	0	0	0		0	0	0.0205026	0.000995526	0	0			0	0	0	0	0.000620679		0.003	0.178	0.08	0.22	0.03	0.33
	0	0	0	0	0	0		0	0	0.0212228	0.00111118	0	0			0	0	0	0	0.000624312		0.002	0.003	0	0.26	0.25	0.01
	0	0	0	0	0	0		0	0	0.0214766	0.00223938	0	0			0	0	0	6.21e-05	0.000686838		0.004	0.028	0.1	0	0.06	0.01
	0	0	0	0	0	0		0	0	0.0233521	0.00224278	0	0			0	0	0	6.22e-05	0.000741336		0.017	0.082	0	0.01	0.02	0.04
	0	0	0	0	0	0		0	0	0.0242252	0.00247313	0	0			0	0	0	6.24e-05	0.000873508		0	0.028	0.03	0.01	0	0.1
	0	0	0	0	0	0		0	0	0.0315346	0.00261032	0	0			0	0	0	0.000124394	0.00093459		0.001	0.022	0.06	0	0.02	0.37
	0	0	0	0	0	0		0	0	0.0333634	0.00317132	0	0			0	0	0	0.000436907	0.00099289		0.016	0.058	0.03	0.06	0.01	0.11
	0	0	0	0	0	0		0	0	0.0353198	0.00349535	0	0			0	0	0	0.000499131	0.000993745		0.005	0.002	0.01	0.57	0.01	1.04
	0	0	0	0	0	0		0	0	0.0464864	0.00362566	0	0			0	0	0	0.000562964	0.000995063		0.045	0.009	0.09	0	0.01	0.02
	0	0	0	0	0	0		0	0	0.0672281	0.0037885	0	0			0	0	0	0.000748625	0.00105729		0.011	0.001	0.02	0	0	0.59
	0	0	0	0	0	0		0	0	0.0829718	0.00380459	0	0			0	0	0.000619561	0.00106472	0.00111475		0.003	0.003	0.05	0.07	0.03	0.41
	0	0	0	0	0	0		0	0	0.0905188	0.00386046	0	0			0	0	0.00096978	0.00106474	0.00124841		0.014	0.056	0.19	0.03	2.42	0
	0	0	0	0	0	0		0	0	0.111221	0.00392395	0	0			0	0	0.00371685	0.00123938	0.00131104		0.008	0.008	0.01	0.07	0.04	0.03
	0	0	0	0	0	0		0	0	0.117215	0.00443008	0	0			0	0	0.00693452	0.00124521	0.00137349		0.004	0.001	0.01	0.11	0	0.11
	0	0	0	0	0	0		0	0	0.144572	0.00448697	0	0			0	0	0.010248	0.00149235	0.00137504		0.022	0.007	0	0.01	0	0
	0	0	0	0	0	0		0	0	0.156974	0.00480226	0	0			0	0	0.0238026	0.00181967	0.00155507		0.096	0.024	0.03	0.05	0.01	0.45
	0	0	0	0	0	0		0	0	0.168343	0.00490621	0	0			0	0	0.0355434	0.00225485	0.0016196		0.003	0.001	0.02	0.01	0	0.64
	0	0	0	0	0	0		0	0	0.196375	0.00563727	0	0			0	0	0.0396242	0.00229485	0.00179699		0.029	0.003	0	0.01	0	0.04
	0	0	0	0	0	0		0	0	0.249821	0.00567811	0	0			0.000187113	0	0.0398071	0.00254418	0.00185461		0.215	0.007	0.36	0.33	0.11	0.15
	0	0	0	0	0	0		0	0		0.00570604	0	0			0.00043636	0	0.0495655	0.003257	0.00187343		0.028	0.002	0.04	0.11	0.04	0.01
	0	0	0	0	0	0		0	0		0.00582442	0	0			0.00056163	0	0.0522444	0.00342088	0.00191334		0.01	0.267	0	0.04	0	0
	0	0	0	0	0	0		0	0		0.00666627	0	0			0.000744213	0	0.0548031	0.00361758	0.00192422		0.017	0.012	0.28	1.22	0	0
	0	0	0	0	0	0		0	0		0.00850539	0	0			0.00796832	0	0.0713769	0.00362612	0.0019253		0.006	0.038	0.01	0.01	0.01	0.03
	0	0	0	0	0	0		0	0		0.00854254	0	0			0.00821766	0	0.0782411	0.00424637	0.0019898		0.025	0.048	0.01	0.09	0.02	0.02
	0	0	0	0	0	0		0	0		0.0087256	0	0			0.00922388	0	0.0816164	0.00462752	0.00205281		0.002	0.028	0.01	0.03	0.04	0.01
	0	0	0	0	0	0		0	0		0.00873176	0	0			0.0122589	0	0.08273	0.00516576	0.00206178		0.001	0.013	0	0.04	0	0.1
	0	0	0	0	0	0		0	0		0.00911402	0	0			0.0131586	0	0.106684	0.00593768	0.00212138		0.004	0.006	0.09	0.4	0	0.01
	0	0	0	0	0	0		0	0		0.010928	0	0			0.0166515	0	0.111191	0.00602992	0.00236335		0.029	0.009	0	0	0.01	1.97
	0	0	0	0	0	0		0	0		0.0129632	0	0			0.0235147	0	0.11163	0.00665892	0.00242589		2.934	0.017	0.85	0.11	0.13	0.09
	0	0	0	0	0	0		0	0		0.0133209	0	0			0.0357256	0	0.114245	0.00698302	0.00249042		0.009	0.004	0.04	0.05	0.01	0.05
	0	0	0	0	0	0		0	0		0.01392	0	0			0.0360344	0	0.117413	0.00859652	0.00255043		0.005	0	0.08	0.2	0.01	0.01
	0	0	0	0	0	0		0	0		0.0141682	0	0			0.0418182	0	0.12565	0.009769	0.00255756		0.031	0.582	0.48	0.02	0.02	0.04
	0	0	0	0	0	0		0	0		0.0156313	0	0			0.0427527	0	0.128571	0.0132225	0.00261163		0.007	0.004	0.43	0.09	0.01	0.36
	0	0	0	0	0	0		0	0		0.0156751	0	0			0.0609452	0	0.134446	0.0136886	0.00262042		0.004	0.013	0	0.35	0.03	0
	0	0	0	0	0	0		0	0		0.0160856	0	0			0.0621156	0	0.144393	0.0189005	0.0026228		0.069	0.001	0	0.2	0.01	0.02
	0	0	0	0	0	0		0	0		0.0168425	0	0			0.0680847	0	0.158362	0.0204899	0.00265171		0.003	0.069	0.27	0.01	0	0.02
	0	0	0	0	0	0		0	0		0.0173897	0	0			0.0737539	0	0.162818	0.0209311	0.0027988		0.004	0.01	0.03	0.03	0.01	0
	0	0	0	0	0	0		0	0		0.0174277	0	0			0.084733	0	0.171231	0.0210709	0.002811		0.025	0.005	0.14	0.17	0	0.01
	0	0	0	0	0	0		0	0		0.0178407	0	0			0.12353	0	0.175359	0.0219767	0.0029678		0.004	0.126	0.09	1.5	0.13	0.02
	0	0	0	0	0	0		0	0		0.0191782	0	0			0.143345	0	0.226126	0.0258494	0.00335375		0.009	2.475	0.05	0.36	0.04	0.11
	0	0	0	0	0	0		0	0		0.0192375	0	0			0.171774	0	0.300751	0.0267863	0.00368391		0.001	0	0.2	0.04	0	0.2
	0	0	0	0	0	0		0	0		0.021409	0	0			0.197513	0	0.307919	0.0283206	0.00390611		0	0.02	0	0.01	0	0.33
	0	0	0	0	0	0		0	0		0.0220012	0	0			0.211231	0	0.344297	0.0288418	0.00414249		0.043	0.005	0.02	0.1	0.05	0.52
	0	0	0	0	0	0		0	0		0.0234067	0	0			0.22663	0	0.352193	0.0299891	0.00443017		0.002	0.067	3.28	0	0.02	0
	0	0	0	0	0	0		0	0		0.0255312	0	0			0.234842	0	0.353836	0.0325096	0.00443371		0.003	0.062	2.85	0	0.06	0.42
	0	0	0	0	0	0		0	0		0.0274435	0	0			0.280016	0	0.361398	0.0354046	0.00477155		0.011	0.542	0.35	0	0.03	0.03
	0	0	0	0	0	0		0	0		0.0278186	0	0			0.351376	0	0.370148	0.0361916	0.00488443		0.079	0.021	0.15	0.01	0.01	0.01
	0	0	0	0	0	0		0	0		0.0278705	0	0			0.769505	0	0.378532	0.0410482	0.00495847		0.002	0.053	0.03	0	0.08	0.24
	0	0	0	0	0	0		0	0		0.0280716	0	0			1.58071	0	0.408846	0.0459829	0.00505411		0.168	0.003	0	0	0.05	0.41
	0	0	0	0	0	0		0	0		0.032203	0	0			0	0	0.420373	0.0463922	0.00521336		0.034	0.011	0.04	0.01	0.02	0.04
	0	0	0	0	0	0		0	0		0.0348441	0	0			0	0	0.615332	0.0495154	0.0053629		0.003	0.006	0.03	0	0.02	0.01
	0	0	0	0	0	0		0	0		0.0370539	0	0			0	0	0.771108	0.0501	0.00560306		0.001	0.005	0.22	0	0.03	0.2
	0	0	0	0	0	0		0	0		0.0380231	0	0			0	0	0.79683	0.0510795	0.00567329		0.004	0.031	0.06	0	0	0.01
	0	0	0	0	0	0		0	0		0.0384705	0	0			0	0	0.835217	0.0550523	0.00575711		0.07	0	0.02	0.02	0	0.02
	0	0	0	0	0	0		0	0		0.0387077	0	0			0	0	0.855799	0.0565863	0.00584608		0.003	0.001	0	0.01	0	0.13
	0	0	0	0	0	0		0	0		0.0398468	0	0			0	0	1.13776	0.0647612	0.00611151		0.001	0.015	0	0	0.08	0.01
	0	0	0	0	0	0		0	0		0.0401884	0	0			0	0	1.5518	0.064851	0.00660983		0.004	0.057	0.05	0.05	0.05	0.13
	0	0	0	0	0	0		0	0		0.0429453	0	0			0	0	1.55629	0.0653838	0.00661339		0.076	0.004	0.11	0.02	0.01	0.01
	0	0	0	0	0	0		0	0		0.0468542	0	0			0	0	1.96472	0.0664407	0.00666584		0.059	0.185	0.05	0.01	0	0.07
	0	0	0	0	0	0		0	0		0.0482747	0	0			0	0	2.17564	0.068049	0.00686619		0.008	0.031	0.04	0	0.05	0.44
	0	0	0	0	0	0		0	0		0.0488969	0	0			0	0	2.31946	0.0722041	0.00687552		0	0.02	0.11	0.01	0	0.32
	0	0	0	0	0	0		0	0		0.0517701	0	0			0	0	0	0.0732698	0.00696238		0.024	0.42	0.12	0.04	0.08	0.28
	0	0	0	0	0	0		0	0		0.0518834	0	0			0	0	0	0.087104	0.00697688		0.126	0.001	1.91	0.01	0	0.32
	0	0	0	0	0	0		0	0		0.0563703	0	0			0	0	0	0.087295	0.00710058		0.048	0.001	0.22	0.03	0.01	0.03
	0	0	0	0	0	0		0	0		0.0578804	0	0			0	0	0	0.0921434	0.00722133		0.132	1.178	2.06	0.04	0.03	0
	0	0	0	0	0	0		0	0		0.0603343	0	0			0	0	0	0.0926541	0.00722319		0.003	0.442	0.16	0	0.09	0
	0	0	0	0	0	0		0	0		0.06504	0	0			0	0	0	0.0968539	0.00751586		0.02	0.007	0.07	1.22	0.02	0.19
	0	0	0	0	0	0		0	0		0.0689288	0	0.00298128			0	0	0	0.0989249	0.00760584		0.127	0.081	0	0	0.06	0.57
	0	0	0	0	0	0		0	0		0.0708162	0	0.00303589			0	0	0	0.104187	0.00814747		0.002	0.012	0.01	0.03	0.24	0.01
	0	0	0	0	0	0		0	0		0.0772679	0	0.00310747			0	0	0	0.106276	0.00817986		0.034	0.024	0.01	0.01	0.02	0.01
	0	0	0	0	0	0		0	0		0.0813623	0	0.00324283			0	0	0	0.106397	0.00855905		0.013	0.015	0.06	0.79	0.01	0.3
	0	0	0	0	0	0		0	0		0.0845359	0	0.00325277			0	0	0	0.110073	0.00881154		0.053	0.004	0.1	0.02	0	0
	0	0	0	0	0	0		0	0		0.0947646	0	0.00330271			0	0	0	0.110259	0.00908016		0.006	0.059	0.07	0.11	0.09	0.02
	0	0	0	0	0	0		0	0		0.0964463	0	0.00336094			0	0	0	0.112854	0.00908407		0.026	0.002	0	0.03	0.01	0
	0	0	0	0	0	0		0	0		0.0974378	0	0.00337139			0	0	0	0.120741	0.00910915		0.003	0.063	0.51	0	0.01	0.12
	0	0	0	0	0	0		0	0		0.0990417	0	0.00354474			0	0	0	0.132434	0.00968283		0.002	0.002	0.03	0	0.03	0.67
	0	0	0	0	0	0		0	0		0.10572	0	0.00361693			0	0	0	0.132745	0.00972382		0.066	0.063	1.6	0.04	0	0.01
	0	0	0	0	0	0		0	0		0.110502	0	0.00378116			0	0	0	0.133695	0.00989895		0.03	0.024	0.01	0.03	0.01	0.04
	0	0	0	0	0	0		0	0		0.115568	0	0.00398154			0	0	0	0.13416	0.0100289		0	0.003	0.02	0.06	0.01	0.12
	0	0	0	0	0	0		0	0		0.122325	0	0.00405582			0	0	0	0.135172	0.010053		0.101	0.016	0.03	0	0.01	0.01
	0	0	0	0	0	0		0	0		0.122348	0	0.00408915			0	0	0	0.143352	0.0107078		0.009	0.11	1.66	0	0	0.26
	0	0	0	0	0	0		0	0		0.127639	0	0.00412889			0	0	0	0.145244	0.010718		0.025	0.357	0	0.21	0.01	0.13
	0	0	0	0	0	0		0	0		0.128281	0	0.00419455			0	0	0	0.158195	0.0107408		0.004	0.441	0	0.02	0.01	0.08
	0	0	0	0	0	0		0	0		0.146114	0	0.00421389			0	0	0	0.160595	0.0107636		0.025	0.02	0	0.39	0.11	0.3
	0	0	0	0	0	0		0	0		0.159445	0	0.00424464			0	0	0	0.161697	0.0109224		0.002	0.115	0.17	0.05	0.01	0.12
	0	0	0	0	0	0		0	0		0.167936	0	0.00434155			0	0	0	0.167079	0.0115601		0.022	0.005	0.01	0.04	0.01	0
	0	0	0	0	0	0		0	0		0.173793	0	0.00454515			0	0	0	0.169989	0.0118344		0.002	0.005	0.02	0	0.04	0
	0	0	0	0	0	0		0	0		0.174198	0	0.00467325			0	0	0	0.210748	0.0121894		0.009	0.031	0.13	0.06	0	0.17
	0	0	0	0	0	0		0	0		0.174681	0	0.00469895			0	0	0	0.215979	0.0122232		0.002	0.007	0.02	0.01	0	1.64
	0	0	0	0	0	0		0	0		0.189281	0	0.00479655			0	0	0	0.219397	0.0127657		0.145	0.467	0.01	0.01	0.04	0.03
	0	0	0	0	0	0		0	0		0.190918	0	0.00480646			0	0	0	0.242925	0.0127831		0.001	0.014	0	0.15	0	0
	0	0	0	0	0	0		0	0		0.19264	0	0.00504643			0	0	0	0.255269	0.0132509		0.012	0.002	0.04	0.01	0	0.01
	0	0	0	0	0	0		0	0		0.197727	0	0.00505832			0	0	0	0.281503	0.0133714		0.028	0.013	0.16	0.18	0	0.06
	0	0	0	0	0	0		0	0		0.22191	0	0.00508835			0	0	0	0.309641	0.0133853		0.061	0.107	0.01	0.01	0.1	0.12
	0	0	0	0	0	0		0	0		0.222857	0	0.00509633			0	0	0	0.315959	0.0152265		0.043	0.005	0	0.02	0	0
	0	0	0	0	0	0		0	0		0.232047	0	0.00537014			0	0	0	0.360915	0.0157732		0.016	0	0.09	0	0.62	0.2
	0	0	0	0	0	0		0	0		0.239716	0	0.00541005			0	0	0	0.376045	0.0160253		0.061	0.041	0.28	0	0.01	0
	0	0	0	0	0	0		0	0		0.241824	0	0.00599074			0	0	0	0.444059	0.016148		0.005	0.025	0.03	0.17	0	0.02
	0	0	0	0	0	0		0	0		0.245584	0	0.00613373			0	0	0	0.567505	0.0165443		0.011	0.001	0.11	0.03	0	0.01
	0	0	0	0	0	0		0	0		0.274889	0	0.00613795			0	0	0	0.582471	0.0168309		0.122	0.031	0.01	0.01	0.01	0.1
	0	0	0	0	0	0		0	0		0.276225	0	0.00619452			0	0	0	0.636504	0.016915		0.418	0.002	0.04	0.19	0.18	0.05
	0	0	0	0	0	0		0	0		0.294731	0	0.00621414			0	0	0	0.722452	0.0170984		0.126	0.482	0.01	0.1	0.08	0.11
	0	0	0	0	0	0		0	0		0.297749	0	0.00623637			0	0	0	0.742723	0.0172037		0.001	0.054	0.01	0.01	0.07	0.03
	0	0	0	0	0	0		0	0		0.30534	0	0.00649766			0	0.002242	0	0.989987	0.0172658		0.128	0.001	0.07	0.13	0.06	0.07
	0	0	0	0	0	0		0	0		0.307471	0	0.00691677			0	0.00443295	0	1.15972	0.0174722		0.001	0.022	0.02	0.13	0.03	0.01
	0	0	0	0	0	0		0	0		0.313251	0	0.00692699			0	0.00798587	0	1.23771	0.0176088		0.012	0.088	0.23	0.23	0.12	0.18
	0	0	0	0	0	0		0	0		0.38562	0	0.00705578			0	0.00822275	0	1.24159	0.0178589		0.077	0	0.01	0.02	0.8	0.06
	0	0	0	0	0	0		0	0		0.464095	0	0.0310945			0	0.00841953	0	0	0.0181095		0.003	0.009	0	0.24	0	0.43
	0	0	0	0	0	0		0	0		0.470892	0	0.0313009			0	0.00883277	0	0	0.0184554		0.004	0.091	0.08	0.09	0.09	0.01
	0	0	0	0	0	0		0	0		0.50342	0	0.0314641			0	0.0166101	0	0	0.0185288		0.013	0.01	0.24	0.54	0	0.01
	0	0	0	0	0	0		0	0		0.532836	0	0.033004			0	0.019029	0	0	0.0187028		0.09	0.628	0	3.64	0.03	0.1
	0	0	0	0	0	0		0	0		0.542356	0	0.0332722			0	0.0240745	0	0	0.0189796		0.003	0.002	0.66	0.01	0.01	0.01
	0	0	0	0	0	0		0	0		0.574014	0	0.0333357			0	0.0279122	0	0	0.0200332		0.004	0.009	0.09	0.02	0.19	0
	0	0	0	0	0	0		0	0		0.602482	0	0.0333736			0	0.028024	0	0	0.0200715		0.004	0.001	0.76	0.03	0.02	0.19
	0	0	0	0	0	0		0	0		0.660156	0	0.0341603			0	0.028578	0	0	0.0203089		0.025	0.063	0.01	0.05	0	0.11
	0	0	0	0	0	0		0	0		0.750155	0	0.0341958			0	0.0314132	0	0	0.0206021		0.021	0.008	0.11	0.21	0.16	0.01
	0	0	0	0	0	0		0	0		1.21412	0	0.0354327			0	0.0416463	0	0	0.0206307		0.091	0.123	0.3	0	0	0
	0	0	0	0	0	0		0	0		1.60939	0	0.0358062			0	0.0526409	0	0	0.0219972		0.003	0.01	0	0	0	0.02
	0	0	0	0	0	0		0	0		2.4917	0	0.0358654			0	0.055319	0	0	0.0222028		0.001	0.22	0.12	0.03	0.36	0.02
	0	0	0	0	0	0		0	0		2.80157	0	0.0364208			0	0.0571913	0	0	0.0224614		0.001	0.042	0.15	0.01	0.05	0.01
	0	0	0	0	0	0		0	0.000124112		3.22214	0	0.0366701			0	0.0610603	0	0	0.0227568		0.165	0.008	0.06	0.42	0.03	0
	0	0	0	0	0	0		0	0.000124592		5.85129	0	0.0368439			0	0.0622357	0	0	0.022804		0.003	0.009	0	0.03	0.01	0.03
	0	0	0	0	0	0		0	0.000124912		0	0	0.0369954			0	0.0628812	0	0	0.0230328		0.001	0.005	0.03	0.03	0.02	0.08
	0	0	0	0	0	0		0	0.000249309		0	0	0.0371506			0	0.0745075	0	0	0.0237511		0.015	0.037	0.02	0	0.01	0.34
	0	0	0	0	0	0		0	0.000249438		0	0	0.0384445			0	0.0807217	0	0	0.0237922		0.009	0.019	0	0.02	0.02	0.01
	0	0	0	0	0	0		0	0.000311418		0	0	0.0386413			0	0.0864842	0	0	0.0241215		0.013	0.022	0.07	0.08	0.08	0.04
	0	0	0	0	0	0		0	0.000371572		0	0	0.0389291			0	0.0897442	0	0	0.0242075		0.033	0.039	0.05	0.13	0	0.04
	0	0	0	0	0	0		0	0.000373762		0	0	0.0390572			0	0.0930278	0	0	0.0244727		0.002	0.008	0.01	0.04	0.01	0.03
	0	0	0	0	0	0		0	0.000747518		0	0	0.0393057			0	0.122401	0	0	0.0248792		0.072	0.001	0.05	0	0.27	7.17
	0	0	0	0	0	0		0	0.00112197		0	0	0.0396465			0	0.12813	0	0	0.0254108		0.032	0.013	0.4	0.03	0.02	0
	0	0	0	0	0	0		0	0.00143239		0	0	0.0399207			0	0.12868	0	0	0.0267091		0.059	0.009	0	0.03	0.15	0.05
	0	0	0	0	0	0		0	0.00149609		0	0	0.039983			0	0.146645	0	0	0.0276498		0.028	0	0.02	0.06	0.08	0.02
	0	0	0	0	0	0		0	0.00161813		0	0	0.0409306			0	0.169033	0	0	0.028146		0.001	0.877	0.02	0.2	0.24	0.07
	0	0	0	0	0	0		0	0.00200091		0	0	0.0410028			0	0.176995	0	0	0.0286402		0.132	0.014	0	0.02	1.4	0.06
	0	0	0	0	0	0		0	0.00211802		0	0	0.041341			0	0.226837	0	0	0.0288279		0.656	0.014	0.73	0.08	0.58	0.01
	0	0	0	0	0	0		0	0.0022925		0	0	0.0420769			0	0.231907	0	0	0.0289753		0.061	0.001	0	0.03	0.04	0.01
	0	0	0	0	0	0		0	0.00292394		0	0	0.0421519			0	0.292078	0	0	0.0296403		0.117	0.239	0.04	0.27	0	0.02
	0	0	0	0	0	0		0	0.00317894		0	0	0.0422853			0	0.302996	0	0	0.0300468		0.178	0.118	0.01	0.03	0	0.01
	0	0	0	0	0	0		0	0.00398484		0	0	0.0423477			0	0.346606	0	0	0.0305274		0.014	0.009	0.19	0	0.17	0.03
	0	0	0	0	0	0		0	0.00423604		0	0	0.0430094			0	0.357335	0	0	0.031153		0.085	0.076	0.04	0.01	0	0.07
	0	0	0	0	0	0		0	0.00441052		0	0	0.0441724			0	0.383948	0	0	0.0315599		0.003	0.159	1.71	0.11	0.01	0.01
	0	0	0	0	0	0		0	0.0047315		0	0	0.0449737			0	0.451489	0	0	0.0318167		0.118	1.497	0	0	0.18	0
	0	0	0	0	0	0		0	0.00511269		0	0	0.0456284			0.000186946	0.457838	0	0	0.0320006		0.002	0.086	0.01	0.13	0.01	0.06
	0	0	0	0	0	0		0	0.00522505		0	0	0.0459102			0.000432294	0.587364	0	0	0.0325573		0.073	0.04	0.07	0.11	0.07	0
	0	0	0	0	0	0		0	0.0052976		0	0	0.0461841			0.00110941	0.730848	0	0	0.0325957		0.002	0.086	0.01	0.13	0.25	0.31
	0	0	0	0	0	0		0	0.00547044		0	0	0.0466179			0.00181012	0.87034	0	0	0.0326348		0.031	0.019	0	0.01	0.26	0.04
	0	0	0	0	0	0		0	0.00599036		0	0	0.0468184			0.00186129	0	0	0	0.0326763		0.014	0.04	0.02	0.17	0.15	0.12
	0	0	0	0	0	0		0	0.00691426		0	0	0.046886			0.00199685	0	0	0	0.0332747		0.132	0.816	0	0.03	0.05	0.01
	0	0	0	0	0	0		0	0.00699914		0	0	0.0469627			0.00249557	0	0	0	0.0337837		0.022	0.007	0.38	0.06	0.01	0
	0	0	0	0	0	0		0	0.00723046		0	0	0.047948			0.00268584	0	0	0	0.0339		0.052	0.001	0.06	0.01	0.08	0
	0	6.23e-05	0	0	0	0		0	0.00748271		0	0	0.048253			0.0058581	0	0	0	0.0345096		0.074	0.441	0.15	0.32	0	0
	0	0.000124513	0	0	0	0		0	0.00760636		0	0	0.0482677			0.00716273	0	0	0	0.0347203		0.123	0.048	0	0	0.16	0.22
	0	0.000124587	0	0	0	0		0	0.00786462		0	6.23e-05	0			0.00721971	0	0	0	0.0350232		0.01	0.016	0.19	0.33	0.08	0.16
	0	0.000186596	0	0	0	0		0	0.00807956		0	6.23e-05	0.0489561			0.007577	0	0	0	0.0354032		0.017	0.029	0	0.01	0.08	0.04
	0	0.000373667	0	0	0	0		0	0.00862175		0	6.25e-05	0			0.0103879	0	0	0	0.035793		0.027	0.016	0.07	0	0.01	0.01
	0	0.000373744	0	0	0	0		0	0.00873465		0	6.25e-05	0			0.0106731	0	0	0	0.0365643		0.005	0.014	0.04	0.08	0.19	0.02
	0	0.000437108	0	0	0	0		0	0.00883197		0	0.000123465	0.00719172			0.010827	0	0	0	0.0367598		0.008	0.006	0.01	0.14	0.01	0.22
	0	0.00099131	0	0	0	0		0	0.0090163		0	0.000124581	0			0.0188284	0	0	0	0.0368436		0.208	0.001	0.03	0.08	0.01	0.01
	0	0.00117903	0	0	0	0		0	0.00945392		0	0.000185485	0			0.0204541	0	0	0	0.0370675		0.029	0.251	0.08	0.03	0.01	0.24
	0	0.00117904	0	0	0	0		0	0.00954338		0	0.000186661	0			0.0208149	0	0	0	0.0371629		0.031	0.001	0	0.02	0.03	0.08
	0	0.00136956	0	0	0	0		0	0.0100857		0	0.000247877	0			0.023092	0	0	0	0.0372451		0.002	0.027	0.01	0.32	0	0.15
	0	0.00137791	0	0	0	0		0	0.0110005		0	0.000248212	0.00736711			0.0322332	0	0	0	0.0379066		0.008	0.001	0.01	0.02	0.05	0.01
	0	0.00142502	0	0	0	0		0	0.0115139		0	0.000248812	0			0.0325817	0	0	0	0.0383073		0.015	0.01	0	0.03	0	0.39
	0	0.00148699	0	0	0	0		0	0.0142256		0	0.000249707	0			0.0371477	0	0	0	0.0388769		0.001	0.036	0	0.11	0.82	0.01
	0	0.00149872	0	0	0	0		0	0.0151373		0	0.000309141	0			0.037656	0	0	0	0.0392784		0.209	0.007	0.01	0	0.18	0.14
	0	0.00155465	0	0	0	0		0	0.0153892		0	0.000311585	0			0.0397917	0	0	0	0.0392933		0.006	1.001	0.02	0.59	0	0.11
	0	0.0016211	0	0	0	0		0	0.0158082		0	0.000458069	0			0.0444307	0	0	0	0.0395548		0.026	0.002	3.77	0.07	0.01	0.27
	0	0.00162529	0	0	0	0		0	0.0184584		0	0.000498362	0			0.055483	0	0	0	0.0396976		0.002	0.002	0.01	0.09	0.03	0.28
	0	0.00166936	0	0	0	0		0	0.018705		0	0.000498866	0			0.0595141	0	0	0	0.0398186		0.026	0.004	0.04	0.1	0.26	0.01
	0	0.00174659	0	0	0	0		0	0.0190903		0	0.000558371	0			0.0615166	0	0	0	0.0401775		0.003	0.044	0.04	0.02	0.1	0.01
	0	0.0018083	0	0	0	0		0	0.0197666		0	0.000559921	0			0.0618903	0	0	0	0.0405177		0.01	0.015	0.05	0.3	0.39	0.01
	0	0.00193228	0	0	0	0		0	0.0241324		0	0.0005605	0.0075435			0.0680148	0	0	0	0.0406699		0.034	0.016	0.48	0.26	0.32	0.24
	0	0.00205998	0	0	0	0		0	0.0245437		0	0.000561201	0			0.0737861	0	0	0	0.0412995		0.002	0.011	0.34	0	0.06	0.14
	0	0.00217628	0	0	0	0		0	0.0254007		0	0.000561502	0.00756156			0.0739753	0	0	0	0.0415458		0.007	0	0.06	0.18	0.01	0.24
	0	0.00218554	0	0	0	0		0	0.025456		0	0.000619304	0			0.0864246	0	0	0	0.0416499		0.166	0.029	0.41	0.03	0.14	0.19
	0	0.00223878	0	0	0	0		0	0.0261015		0	0.000684822	0.00764784			0.14823	0	0	0	0.0433482		0.015	0.03	0.34	0.03	0.01	0.22
	0	0.00234786	0	0	0	0		0	0.0264581		0	0.000685055	0.00772374			0.159339	0	0	0	0.0444423		0.101	0.009	0.21	0.13	0.17	0.16
	0	0.00237182	0	0	0	0		0	0.0264756		0	0.000811061	0			0.18913	0	0	0	0.0448212		0.016	0.01	0.52	0.12	0.03	0.01
	0	0.00241663	0	0	0	0		0	0.0267525		0	0.000869828	0.00788081			0.192933	0	0	0	0.0448996		0.138	0.015	0.04	0.41	0.41	0.14
	0	0.00243173	0	0	0	0		0	0.0271914		0	0.000992284	0.00802139			0.229006	0	0	0	0.0457815		0.37	0.005	0.02	0.03	0.24	0.68
	0	0.00254972	0	0	0	0		0	0.0280098		0	0.00105726	0.00816789			0.239284	0	0	0	0.0475085		0.176	0.082	0	0.02	0	0.06
	0	0.00267243	0	0	0	0		0	0.0290851		0	0.00112096	0			0.275497	0	0	0	0.0476209		0.002	0.009	0.72	0.28	0.09	0
	0	0.00291197	0	0	0	0		0	0.0300187		0	0.00112742	0			0.282287	0	0	0	0.0478737		0.131	0.037	0.57	0.03	0.03	0.26
	0	0.00293563	0	0	0	0		0	0.0308086		0	0.00117952	0			0.546496	0	0	0	0.0478926		0.085	0.059	0.03	0.06	0.08	0.01
	0	0.00299562	0	0	0	0		0	0.030976		0	0.00119001	0.00847194			1.03425	0	0	0	0.0479084		0.001	0.026	0.09	0.47	0.22	0.09
	0	0.00305976	0	0	0	0		0	0.0319419		0	0.00136247	0			1.55396	0	0	0	0.0479417		0.002	0.013	0.02	0.08	0.1	0.18
	0	0.00317631	0	0	0	0		0	0.0323304		0	0.00143497	0				0	0	0	0.0479673		0.001	0.001	0.29	0.07	0.02	0.23
	0	0.00317638	0	0	0	0		0	0.032443		0	0.00148582	0				0	0	0	0.0489317		0.056	0	0.13	0.07	0.15	0.05
	0	0.00318639	0	0	0	0		0	0.0335776		0	0.00155877	0				0	0	0	0.0491167		0.008	0.073	0.01	0.02	0.04	0.05
	0	0.00319424	0	0	0	0		0	0.0355721		0	0.00156092	0				0	0	0	0.049233		0.073	0.009	0.68	0.03	0.23	0.41
	0	0.00341292	0	0	0	0		0	0.0460088		0	0.00161927	0				0	0	0	0.0497071		0.042	0.014	0.04	0.61	0.19	0.08
	0	0.00349575	0	0	0	0		0	0.0473808		0	0.00161963	0				0	0	0	0.0500601		0.002	0.004	0.01	0.06	0.05	0.39
	0	0.00367979	0	0	0	0		0	0.047495		0	0.00162064	0				0	0	0	0.0501884		0.074	0.003	0.44	0.18	0.03	0.21
	0	0.00374226	0	0	0	0		0	0.0494526		0	0.00168598	0				0	0	0	0.0505242		0.022	0.016	0.69	0.06	0.02	0.02
	0	0.00380581	0	0	0	0		0	0.0504444		0	0.00198444	0.00861004				0	0	0	0.0507495		0.113	0.313	0.01	0.09	0.02	0.1
	0	0.00398609	0	0	0	0		0	0.0511342		0	0.0020042	0.00878711				0	0	0	0.0514648		0.015	0.011	0.59	0.03	0.03	0
	0	0.00405689	0	0	0	0		0	0.0513588		0	0.00204952	0				0	0	0	0.052529		0.091	0.005	0.15	0.11	0.03	0.3
	0	0.00409852	0	0	0	0		0	0.0548366		0	0.00205986	0.0490923				0	0	0	0.052556		0.185	0.013	0.9	0.13	0.05	0.2
	0	0.00412142	0	0	0	0		0	0.0588108		0	0.00217373	0				0	0	0	0.0549044		0.002	0.034	2.25	0.01	0	0
	0	0.00436055	0	0	0	0		0	0.0647603		0	0.00224516	0.00906				0	0	0	0.0570574		0.007	0.009	0.62	0.25	0.09	0.07
	0	0.00437601	0	0	0	0		0	0.0657374		0	0.00235477	0.00911354				0	0	0	0.0574572		0.021	0.044	0.31	0.07	0	0.02
	0	0.00448882	0	0	0	0		0	0.068257		0	0.00243471	0				0	0	0	0.0580748		0.01	0.001	0.03	0.13	0.09	0
	0	0.00454082	0	0	0	0		0	0.0775798		0	0.00249613	0				0	0	0	0.0604541		0.062	0.006	0.01	0.12	0.39	0.15
	0	0.00454802	0	0	0	0		0	0.0837968		0	0.00254023	0				0	0	0	0.0607325		0.014	0.05	0.9	0.26	0	0.07
	0	0.00461729	0	0	0	0		0	0.0839698		0	0.00266415	0				0	0	0	0.0608866		0.02	0.006	0.04	0.06	0.01	2.93
	0	0.00480649	0	0	0	0		0	0.0878967		0	0.0027261	0				0	0	0	0.0608967		0.287	0.033	0.35	0.04	0.01	0.02
	0	0.00490663	0	0	0	0		0	0.0883009		0	0.00272878	0				0	0	0	0.0619536		0.228	0.007	1.32	0.18	0.03	0.39
	0	0.00506672	0	0	0	0		0	0.0947846		0	0.0027467	0.00931472				0	0	0	0.0629736		0.008	0.143	0.31	0.21	1.04	0.07
	0	0.00509274	0	0	0	0		0	0.0950554		0	0.00286649	0.0491822				0	0	0	0.0648809		0.007	0.018	0.69	0.2	0.27	0.04
	0	0.00511308	0	0	0	0		0	0.0951141		0	0.00292354	0				0	0	0	0.066321		0.041	0.316	0.08	0.01	0.77	0
	0	0.00538658	0	0	0	0		0	0.0973409		0	0.00292682	0				0	0	0	0.0665266		0.012	0.002	0.39	0.11	0.11	0
	0	0.00547234	0	0	0	0		0	0.102536		0	0.00293121	0				0	0	0	0.0694179		0.035	0.004	0.11	0.08	0.05	0.21
	0	0.0054861	0	0	0	0		0	0.103563		0	0.00293406	0				0	0	0	0.0697547		0.002	0.17	0.12	0.1	0.01	0
	0	0.00566849	0	0	0	0		0	0.114244		0	0.00297982	0.0495953				0	0	0	0.0719634		0.001	0.021	0.01	0.11	0.01	0
	0	0.00574566	0	0	0	0		0	0.115047		0	0.00299469	0.0495953				0	0	0	0.0719844		0.002	0.25	0.23	0	0.08	0
	0	0.00574724	0	0	0	0		0	0.121984		0	0.00305784	0				0	0	0	0.0722645		0.002	0.051	0.73	0	0.16	0.01
	0	0.00576199	0	0	0	0		0	0.130799		0	0.00317712	0				0	0	0	0.0739469		0.001	0.06	0.05	0.37	0.11	0.03
	0	0.00584254	0	0	0	0		0	0.134604		0.000124044	0.00333355	0.00939355				0	0	0	0.076925		0.04	0.122	0.29	0	0	0
	0	0.00592191	0	0	0	0		0	0.149226		0.000739445	0.00335896	0				0	0	0	0.0769793		0.008	0.335	0.52	0.17	0.12	0.09
	0	0.00605493	0	0	0	0		0	0.154868		0.000873465	0.00341586	0				0	0	0	0.077778		0.424	0.003	0.32	0.06	0.09	0
	0	0.00608671	0	0	0	0		0	0.179681		0.000998632	0.00344144	0				0	0	0	0.0815481		0.006	0.002	0.68	0	0.1	0
	0	0.00624545	0	0	0	0		0	0.200115		0.00111794	0.00363574	0				0	0	0	0.0821032		0.011	0.006	0.08	2.18	0.11	0
	0	0.00638209	0	0	0	0		0	0.202926		0.00136523	0.00371343	0				0	0	0	0.0822228		0.004	0.005	0.17	0.2	0.06	0
	0	0.00647663	0	0	0	0		0	0.20461		0.00162275	0.00374627	0				0	0	0	0.0841905		0.019	0.078	0.13	0.12	0.06	0.04
	0	0.00655116	0	0	0	0		0	0.20901		0.00179302	0.00382473	0				0	0	0	0.0846475		0.004	0.035	0.35	0.06	0.2	0
	0	0.00655349	0	0	0	0		0	0.209571		0.00246746	0.00390317	0.00964147				0	0	0	0.0852128		0.052	0.002	0.73	0	0.09	1.65
	0	0.00655944	0	0	0	0		0	0.210989		0.00882111	0.00394061	0				0	0	0	0.0860799		0.057	0.029	0.18	0	0.21	0.02
	0	0.00666762	0	0	0	0		0	0.211887		0.010676	0.00424687	0				0	0	0	0.0863676		0.057	0.008	0.64	0.06	0.13	0.04
	0	0.0066747	0	0	0	0		0	0.238406		0.0118976	0.00460698	0				0	0	0	0.0864274		1.747	0.007	0.13	0.1	0.11	0.09
	0	0.00667989	0	0	0	0		0	0.26213		0.0120301	0.00500032	0.00966257				0	0	0	0.0867768		0.016	0.013	0.24	0.02	0.07	0.02
	0	0.00673656	0	0	0	0		0	0.284108		0.0137383	0.00504578	0				0	0	0	0.0897033		0.089	1.035	0.01	0.17	0.02	0.01
	0	0.00678801	0	0	0	0		0	0.285916		0.0149636	0.00511842	0				0	0	0	0.0899402		0.018	0.041	0.46	0.02	0.04	0.02
	0	0.00696728	0	0	0	0		0	0.286387		0.0166653	0.00548523	0				0	0	0	0.0912904		0.172	0.004	0.14	0.06	0.07	0.02
	0	0.0069915	0	0	0	0		0	0.299333		0.017514	0.00608936	0				0	0	0	0.0917609		0.003	0.042	0.02	0.1	0.12	0
	0	0.00705293	0	0	0	0		0	0.314258		0.0223388	0.00624833	0				0	0	0	0.0937214		0.009	0.032	0.35	0.03	0.16	0.06
	0	0.00715761	0	0	0	0		0	0.321783		0.0223625	0.00626816	0				0	0	0	0.0940066		0.001	0.001	0	0.34	0.02	0
	0	0.0071739	0	0	0	0		0	0.339409		0.022743	0.00640514	0				0	0	0	0.0940783		0.08	0.025	0.48	0.01	0.04	0.01
	0	0.00717779	0	0	0	0		0	0.404343		0.0232515	0.00646262	0				0	0	0	0.0943685		0.016	0.016	0	0.04	0.03	0
	0	0.00726047	0	0	0	0		0	0.404927		0.0245325	0.00647539	0				0	0	0	0.0957988		0.003	0.032	0	0.05	0.06	0.03
	0	0.00736617	0	0	0	0		0	0.422118		0.0252408	0.0064913	0.00984758				0	0	0	0.0959792		0.024	0.002	0.01	0.05	0	0.01
	0	0.00748055	0	0	0	0		0	0.429226		0.027771	0.00649353	0				0	0	0	0.0993206		0.035	0.023	0.3	0.08	0	0
	0	0.00783506	0	0	0	0		0	0.583339		0.0278479	0.00653131	0				0	0	0	0.099984		0.007	0.004	0.08	0.01	0.11	0.03
	0	0.00785805	0	0	0	0		0	0.851236		0.0299878	0.0065538	0				0	0	0	0.100881		0.002	0.029	0.04	0.06	0.04	0
	0	0.00808716	0	0	0	0		0	0.918164		0.035976	0.00663865	0				0	0	0	0.101324		0	0.008	0.46	0.08	0.02	0
	0	0.00823119	0	0	0	0		0	1.01796		0.0361481	0.00671582	0.0498852				0	0	0	0.103139		0	0.006	0.52	0.11	0.54	0.04
	0	0.00858078	0	0	0	0		0	3.65696		0.0422187	0.00672178	0				0	0	0	0.103565		0.233	0.001	0.35	0	0.02	0.01
	0	0.00873195	0	0	0	0		0	0		0.0441224	0.00677825	0				0	0	0	0.104323		0.249	0.057	0.02	0.02	0	0
	0	0.00893119	0	0	0	0		0	0		0.0468291	0.00730187	0.0500721				0	0	0	0.104904		0.006	0.012	0.01	0.09	0.02	0.09
	0	0.00897028	0	0	0	0		0	0		0.0476923	0.00736936	0				0	0	0	0.105535		0.003	0.023	0.07	0.01	0.01	0
	0	0.00899055	0	0	0	0		0	0		0.0496581	0.00751056	0				0	0	0	0.106095		0.008	0.107	0.05	0.01	0.08	0.01
	0	0.0091272	0	0	0	0		0	0		0.050571	0.00757062	0				0	0	0	0.10687		0.016	0.001	0.01	0	0.12	0.04
	0	0.00920496	0	0	0	0		0	0		0.0518104	0.00759942	0.0101663				0	0	0	0.106885		0.021	0	0.03	0.09	0.39	0.02
	0	0.0106731	0	0	0	0		0	0		0.091555	0.00764829	0.010304				0	0	0	0.107859		0.102	0.022	0.02	0.04	0.15	0
	0	0.011152	0	0	0	0		0	0		0.0928306	0.0076667	0				0	0	0	0.108718		0.004	0.024	0.01	0	0.01	0
	0	0.0111883	0	0	0	0		0	0		0.0981842	0.00767506	0				0	0	0	0.109575		0.035	0.002	0.04	0.02	0.07	2.55
	0	0.0112489	0	0	0	0		0	0		0.142804	0.00774306	0				0	0	0	0.110543		0.085	0.033	0	0.05	0.45	0.01
	0	0.0113222	0	0	0	0		0	0		0.143705	0.00775462	0				0	0	0	0.11119		0.004	0.002	0.01	0.2	0.11	0
	0	0.0115056	0	0	0	0		0	0		0.149254	0.00780657	0				0	0	0	0.111764		0.008	0.009	0	0.05	0.02	3.41
	0	0.0119235	0	0	0	0		0	0		0.150247	0.00780903	0.0104907				0	0	0	0.112311		0.006	0.025	0.01	0	0	0
	0	0.0121191	0	0	0	0		0	0		0.18311	0.00783859	0				0	0	0	0.118339		0.008	0.011	0	0	0.03	0
	0	0.0123764	0	0	0	0		0	0		0.208232	0.00785534	0.0109014				0	0	0	0.121768		0.287	0.005	3.65	0.01	0.15	0.61
	0	0.0125469	0	0	0	0		0	0		0.231037	0.00814041	0				0	0	0	0.1224		0.018	0.003	0.17	0.19	0.06	0
	0	0.0128603	0	0	0	0		0	0		0.258087	0.00818728	0				0	0	0	0.123624		0.002	0	0.44	0.09	0	0.03
	0	0.0130227	0	0	0	0		0	0		0.314558	0.00821733	0				0	0	0	0.124753		0.787	0.041	1.07	0.02	0.02	0.01
	0	0.0130252	0	0	0	0		0	0		0.340365	0.00823922	0				0	0	0	0.125249		0.013	0.037	0.02	0.05	0	0.16
	0	0.0131704	0	0	0	0		0	0		0.422386	0.0082901	0				0	0	0	0.127728		0.065	0.137	0	0.01	0.01	0.05
	0	0.0134677	0	0	0	6.17e-05		0	0		0.438426	0.0083041	0				0	0	0	0.128182		0.004	0.006	1.23	0.05	0	0.03
	0	0.0136011	0	0	0	6.22e-05		0	0		0.887897	0.00837175	0				0	0	0	0.128203		0.051	0.008	0.01	0.02	0.07	1.35
	0	0.0137341	0	0	0	6.24e-05		0	0		1.10349	0.00852915	0				0	0	0	0.129258		0.014	0.044	0.04	0	0.09	0.02
	0	0.0137421	0	0	0	0.000124362		0	0		1.59465	0.00907553	0				0	0	0	0.130701		0.058	0.006	0.02	0	0.06	0
	0	0.0143055	0	0	0	0.00012481		0	0		1.85345	0.0092073	0.010944				0	0	0	0.131056		0.003	0.007	0.01	0.01	0.02	0
	0	0.0143347	0	0	0	0.000124897		0	0		1.97008	0.00943515	0				0	0	0	0.131477		0.019	0.12	0.14	0.31	1.1	0.04
	0	0.0144393	0	0	0	0.000124948		0	0		0	0.00955282	0				0	0	0	0.131624		0.008	0.015	0.05	0.13	0.02	1.12
	0	0.0148925	0	0	0	0.000186945		0	0		0	0.0095563	0				0	0	0	0.131902		0.008	0.006	0.02	0	0.25	0.01
	0	0.0149272	0	0	0	0.000187116		0	0		0	0.00961225	0.0111774				0	0	0	0.131969		0.113	0.004	0.01	1.11	0.02	0
	0	0.0159377	0	0	0	0.000311283		0	0		0	0.00988893	0				0	0	0	0.132102		0.006	0.009	0	0.04	0.13	0.01
	0	0.0161656	0	0	0	0.000311663		0	0		0	0.00994625	0				0	0	0	0.132415		0.111	0.121	0.06	0.03	0	0
	0	0.0165915	0	0	0	0.000311896		0	0		0	0.0100635	0				0	0	0	0.133477		0.003	0.002	0.01	0.01	0.01	0.01
	0	0.0167446	0	0	0	0.000374759		0	0		0	0.0105918	0				0	0	0	0.134304		0.011	0.004	0.24	0.01	0.13	0.12
	0	0.0170839	0	0	0	0.000433788		0	0		0	0.010618	0				0	0	0	0.140407		0.032	1.945	0.11	0	0.02	0.19
	0	0.0170947	0	0	0	0.000436073		0	0		0	0.0107414	0				0	0	0	0.143565		0	0.003	0	0.68	0	0.01
	0	0.0172035	0	0	0	0.000557968		0	0		0	0.0109103	0				0	0	0	0.144528		0.011	0.009	0.08	0.01	0.05	0.01
	0	0.0175204	0	0	0	0.000681533		0	0		0	0.0109669	0				0	0	0	0.14545		0.046	1.184	0	0	0.08	0.01
	0	0.0175761	0	0	0	0.000745699		0	0		0	0.0114001	0				0	0	0	0.14596		0.041	0.011	0.01	0.01	0.19	0.09
	0	0.0176656	0	0	0	0.000748559		0	0		0	0.0115422	0				0	0	0	0.147751		0.014	0.074	0.01	0.26	0.22	0.24
	0	0.017859	0	0	0	0.000799613		0	0		0	0.0115518	0				0	0	0	0.148713		0.001	0.039	0.01	0	0.27	0.02
	0	0.0183587	0	0	0	0.00099362		0	0		0	0.0115704	0.0111783				0	0	0	0.152925		0	0.015	0.01	0.06	0.02	0.03
	0	0.0184127	0	0	0	0.00106032		0	0		0	0.0118756	0				0	0	0	0.154995		0.002	0.027	0.06	0.13	0	0.03
	0	0.018518	0	0	0	0.0012485		0	0		0	0.0118966	0				0	0	0	0.155015		0.009	0.019	0.17	0	0.01	0.06
	0	0.0186999	0	0	0	0.00143576		0	0		0	0.01203	0				0	0	0	0.155125		0.011	0.01	0.13	0.05	0.08	0.01
	0	0.0191593	0	0	0	0.00143665		0	0		0	0.0120903	0.0116061				0	0	0	0.155727		0.001	0.028	0	0.04	0.09	0.08
	0	0.0202315	0	0	0	0.00155862		0	0		0	0.0125375	0.011663				0	0	0	0.157144		0.038	0.011	0.04	0.01	0	0.27
	0	0.0203458	0	0	0	0.00155976		0	0		0	0.0125478	0				0	0	0	0.157284		0.001	0.005	0	0.01	0	0.01
	0	0.0203699	0	0	0	0.00167931		0	0		0	0.0129839	0				0	0	0	0.157943		0.001	0.003	0.02	0	0.05	0.14
	0	0.02052	0	0	0	0.00174939		0	0		0	0.0130125	0				0	0	0	0.161112		0.004	0.041	0.03	0.23	0.01	0.02
	0	0.0207685	0	0	0	0.00180233		0	0		0	0.0130471	0				0	0	0	0.161754		0.002	0.006	0.01	0.03	0.04	0.06
	0	0.0213181	0	0	0	0.0021231		0	0		0	0.013551	0				0	0	0	0.163705		0.044	0.02	0.11	0.02	0.57	0.23
	0	0.0214619	0	0	0	0.00217898		0	0		0	0.0137642	0				0	0	0	0.165608		0.295	0.004	0.2	0.01	0.02	0
	0	0.0220953	0	0	0	0.00218757		0	0		0	0.0140119	0.0503139				0	0	0	0.166731		0.043	0.204	0	0.05	0.02	0.01
	0	0.0227063	0	0	0	0.00224335		0	0		0	0.0140833	0				0	0	0	0.167106		0.006	0.079	0	0.01	0.03	0.49
	0	0.0229446	0	0	0	0.0022929		0	0		0	0.0144629	0.0116733				0	0	0	0.168632		0.029	0.002	0.23	0.02	0	0.11
	0	0.0229487	0	0	0	0.00230602		0	0		0	0.0145432	0.0121334				0	0	0	0.17096		0.204	0.11	0.01	0.03	0.09	0.04
	0	0.0230611	0	0	0	0.00237171		0	0		0	0.0148158	0				0	0	0	0.171355		0.117	0.001	0.01	0	0.34	0.01
	0	0.0249174	0	0	0	0.00265862		0	0		0	0.0148522	0				0	0	0	0.172217		0.001	0.08	0.15	0.14	0.05	0.02
	0	0.025166	0	0	0	0.00299896		0	0		0	0.0153295	0.0517559				0	0	0	0.172389		0.028	0.009	0.13	0.13	0.2	0.04
	0	0.0251666	0	0	0	0.00300009		0	0		0	0.0159178	0				0	0	0	0.175662		0.003	0.062	0	0	0.07	0.4
	0	0.0253523	0	0	0	0.00316962		0	0		0	0.0160473	0				0	0	0	0.178789		0.02	0.01	0.01	0.55	0.01	0.03
	0	0.0254437	0	0	0	0.00336547		0	0		0	0.0162253	0				0	0	0	0.181862		0.013	0.004	0.26	0	0	0.02
	0	0.0262842	0	0	0	0.00348517		0	0		0	0.0164145	0				0	0	0	0.185492		0.064	0.003	0.02	0.36	0.06	0
	0	0.0269721	0	0	0	0.00355005		0	0		0	0.0166046	0.0121901				0	0	0	0.187142		0.05	0.024	0.17	0.03	0.19	0.22
	0	0.0274971	0	0	0	0.00355741		0	0		0	0.0166503	0.0122393				0	0	0	0.188743		0.002	0.01	0.11	0.09	0.01	0.02
	0	0.0281845	0	0	0	0.00355824		0	0		0	0.0168937	0				0	0	0	0.18878		0.173	0.063	0.88	0.09	0.02	0.02
	0	0.0294409	0	0	0	0.0037885		0	0		0	0.016946	0				0	0	0	0.189433		0.022	0.005	0.06	0.02	0.04	0.26
	0	0.0298425	0	0	0	0.00379112		0	0		0	0.0172867	0.0123352				0	0	0	0.193609		0.009	0.15	0.14	0.01	0	0
	0	0.0301909	0	0	0	0.0039119		0	0		0	0.0185299	0				0	0	0	0.194056		0.031	0.041	0.32	0.03	0.18	0.22
	0	0.0304218	0	0	0	0.00428166		0	0		0	0.0186656	0				0	0	0	0.19693		0.008	0.007	0.02	0	0.01	0.03
	0	0.0308976	0	0	0	0.00442421		0	0		0	0.0188598	0				0	0	0	0.198515		0.001	0.013	0.1	0.03	0.04	0.22
	0	0.031626	0	0	0	0.00460346		0	0		0	0.0190618	0				0	0	0	0.199498		0.072	0.183	0.12	0.04	0.03	0.05
	0	0.0317644	0	0	0	0.00466778		0	0		0	0.0196836	0.0124302				0	0	0	0.201459		0.018	0.024	0.1	0	0	0.52
	0	0.0323165	0	0	0	0.00479722		0	0		0	0.0200942	0.0126206				0	0	0	0.20159		0.001	0.002	0.08	0.02	0.08	1.04
	0	0.0327722	0	0	0	0.00492203		0	0		0	0.0201648	0				0	0	0	0.203082		0.003	0.027	0.09	0.01	0.28	0.03
	0	0.0331956	0	0	0	0.00523855		0	0		0	0.0201673	0.0521751				0	0	0	0.206389		0.003	0.002	0	0.05	0.01	0.02
	0	0.0336369	0	0	0	0.00523866		0	0		0	0.0201846	0				0	0	0	0.207585		0.01	0.055	0.08	0.13	0.04	0.07
	0	0.0337238	0	0	0	0.005449		0	0		0	0.0202145	0				0	0	0	0.211788		0.033	0.207	0.58	0.03	0.09	0.21
	0	0.0340965	0	0	0	0.00579346		0	0		0	0.0203889	0.0126257				0	0	0	0.213979		0.022	0.022	0.09	0.05	0.01	0.03
	0	0.0362835	0	0	0	0.00635835		0	0		0	0.0205239	0				0	0	0	0.215741		0.007	0.09	0.86	0.03	0.71	0.02
	0	0.0375873	0	0	0	0.00641242		0	0		0	0.0214896	0.0129757				0	0	0	0.216106		0.003	0.165	0	0.02	0	0.01
	0	0.0380248	0	0	0	0.00655325		0	0		0	0.0215729	0				0	0	0	0.217282		0.015	0.247	0.19	0	2.14	0.57
	0	0.0391192	0	0	0	0.00682876		0	0		0	0.0217001	0				0	0	0	0.220226		0.01	0.034	0.02	0.01	0	0.07
	0	0.0413086	0	0	0	0.00688789		0	0		0	0.0217284	0				0	0	0	0.227309		0.027	0.137	0.17	1.74	0.13	0.27
	0	0.0424095	0	0	0	0.00793204		0	0		0	0.0222951	0.0131644				0	0	0	0.229978		0.018	0.044	0	0.01	0.04	0.08
	0	0.0429181	0	0	0	0.0082286		0	0		0	0.0223253	0.0131852				0	0	0	0.231577		0.163	0.054	0.11	0.01	0.06	0.09
	0	0.0430157	0	0	0	0.00836774		0	0		0	0.0225166	0				0	0	0	0.232767		0.044	0.109	0	0.03	0.01	0
	0	0.0431851	0	0	0	0.00870995		0	0		0	0.0228046	0				0	0	0	0.233069		0.009	0.086	0	0.06	0.01	0
	0	0.045323	0	0	0	0.00873881		0	0		0	0.0231161	0				0	0	0	0.234328		0.002	0.008	0.06	0	0.12	0.06
	0	0.0456833	0	0	0	0.00993749		0	0		0	0.0235551	0				0	0	0	0.237258		0	0.032	0.08	0.03	0.03	0.21
	0	0.0460248	0	0	0	0.0101311		0	0		0	0.0236069	0				0	0	0	0.247289		0.003	0.122	0.3	0.02	0.18	0.01
	0	0.0474564	1	0	0	0.0105946		0	0		0	0.0236266	0				0	0	0	0.248414		0.027	0.001	0	0.03	0.04	0.02
	0	0.0475434	1	0	0	0.0106654		0	0		0	0.0243505	0				0	0	0	0.250102		0.131	0.026	0.01	0.01	0.18	0.01
	0	0.0476999	1	0	0	0.0107159		0	0		0	0.0246973	0				0	0	0	0.252716		0.007	0.033	0.09	0	0.02	0.17
	0	0.0478663	1	0	0	0.0107935		0	0		0	0.0247865	0.013211				0	0	0	0.254785		0.374	0.002	0.06	0.01	0.03	0.06
	0	0.0481586	1	0	0	0.0112947		0	0		0	0.0248199	0				0	0	0	0.262707		0.008	0.079	0	0.02	0.01	0.01
	0	0.048651	1	0	0	0.0113979		0	0		0	0.0249884	0				0	0	0	0.26424		0.039	0.003	0.06	0.03	0.11	0.04
	0	0.0498406	1	0	0	0.01187		0	0		0	0.0254932	0				0	0	0	0.26795		0.004	0.03	0.17	0.02	0.02	0.01
	0	0.0504092	1	0	0	0.0120828		0	0		0	0.0255248	0.0133602				0	0	0	0.26896		0.005	0.027	0.01	0.08	0.04	0.22
	0	0.0508126	1	0	0	0.0122971		0	0		0	0.0256377	0				0	0	0	0.26999		0.01	0.041	0.15	0.01	0.09	0.57
	0	0.0510859	2	0	0	0.0123946		0	0		0	0.0256845	0				0	0	0	0.271475		0.016	0.038	0.09	0.01	0	0.04
	0	0.0512309	2	0	0	0.0131045		0	0		0	0.0262041	0				0	0	0	0.28006		0.103	0.036	0.34	0.04	0.04	0.37
	0	0.0532632	2	0	0	0.0134503		0	0		0	0.0265308	0				0	0	0	0.283987		0.003	0.009	0.01	0.06	0.21	0.01
	0	0.054146	3	0	0	0.0142441		0	0		0	0.0266993	0.0134544				0	0	0	0.285839		0.01	0.031	0.01	0.01	0.05	0
	0	0.0556469	5	0	0	0.0159147		0	0		0	0.0269102	0				0	0	0	0.287044		0.024	0.002	0.05	0.01	0.36	0.42
	0	0.0558789	9	0	0	0.0161591		0	0		0	0.0270891	0.0135398				0	0	0	0.288781		0.004	0.067	0.01	0.04	0.09	0.06
	0	0.0568252		0	0	0.0162974		0	0		0	0.0274359	0				0	0	0	0.291498		0.004	0.097	0.14	0.01	0.17	0.19
	0	0.0584358		0	0	0.0169569		0	0		0	0.0278319	0.0523734				0	0	0	0.296893		1.558	0.001	0	0	0.03	0.34
	0	0.0587836		0	0	0.0173486		0	0		0	0.0281204	0				0	0	0	0.305723		0.166	0	0.6	0.07	0	0.02
	0	0.0597324		0	0	0.0173821		0	0		0	0.0281907	0				0	0	0	0.3074		0.197	0.001	0	0.03	0.12	0.02
	0	0.0599193		0	0	0.0182727		0	0		0	0.0286294	0				0	0	0	0.310671		0.005	0.076	0.05	0.05	0.74	0.02
	0	0.0601106		0	0	0.0182831		0	0		0	0.0300642	0				0	0	0	0.312005		0.205	0.003	0.12	1.65	0.11	0.04
	0	0.0603039		0	0	0.018293		0	0		0	0.0302988	0.0135434				0	0.0218172	0	0.312955		0.027	0.003	0	0	0	0.61
	0	0.0616673		0	0	0.0186507		0	0		0	0.0303292	0				0	0.0483234	0	0.314696		0.004	0.035	0.08	0.15	0.1	0.12
	0	0.0683094		0	0	0.0186899		0	0		0	0.0309114	0				0	0.0548438	0	0.316591		0.074	0.026	0.05	0.09	0.3	0.27
	0	0.0692201		0	0	0.0188677		0	0		0	0.0314021	0				0	0.0636507	0	0.316965		0.001	0.001	0.09	0.03	0.07	0.01
	0	0.0727469		0	0	0.0193418		0	0		0	0.0323541	0				0	0.0636533	0	0.31825		0.934	0.046	0.03	0	0.01	0
	0	0.0737833		0	0	0.0197858		0	0		0	0.032378	0				0	0.0650644	0	0.320144		0.001	0.001	0.71	0.32	0	0.01
	0	0.0749005		0	0	0.0198601		0	0		0	0.0325901	0				0.00037195	0.0703632	0	0.330833		0.037	0.003	0.07	0.68	0.12	0.02
	0	0.0767826		0	0	0.0199082		0	0		0	0.0331965	0				0.00356436	0.0833106	0	0.33095		0.013	0.004	0.01	0.01	0.07	0.04
	0	0.0779221		0	0	0.0201028		0	0		0	0.0333161	0				0.00403441	0.170234	0	0.336844		0.075	0.16	0.16	0.08	0.02	0.02
	0	0.0797943		0	0	0.0202085		0	0		0	0.0334272	0				0.00442802	0.187391	0	0.338948		0.336	0.097	0.02	0.07	0.06	0
	0	0.079862		0	0	0.0203269		0	0		0	0.0335706	0				0.00455366	0.208052	0	0.34114		0	0.018	0.3	0.04	0.05	0.2
	0	0.0799626		0	0	0.0220905		0	0		0	0.0337085	0.013547				0.00518244	0.227068	0	0.344621		0.003	0.073	0.28	0.01	0.04	0.37
	0	0.0805149		0	0	0.0222584		0	0		0	0.0339147	0.0138182				0.00874146	0.285289	0	0.34615		0.008	0.018	0.04	0.1	0.02	0
	0	0.0809304		0	0	0.0230158		0	0		0	0.0339729	0				0.0120778	0.291898	0	0.353369		0.003	0.001	0.05	0	0.01	0.02
	0	0.0816683		0	0	0.0231813		0	0		0	0.0344777	0				0.013788	0.292956	0	0.35472		0.023	0.101	0.11	0.01	0.34	1.29
	0	0.0819568		0	0	0.0254141		0	0		0	0.0345056	0.0138193				0.0177101	0.309974	0	0.359656		0.099	0.01	0.06	0.03	0.09	0.18
	0	0.0823437		0	0	0.0261508		0	0		0	0.034764	0.0138382				0.0253684	0.384579	0	0.362043		0.029	0.079	0	0.21	0.21	0
	0	0.0832945		0	0	0.0266281		0	0		0	0.0351286	0				0.0272879	0.456691	0	0.365034		0.054	0.001	0.09	0.03	0.08	0.04
	0	0.084976		0	0	0.0266764		0	0		0	0.0357571	0				0.0345888	0.53489	0	0.365838		0.082	0.04	0	0.02	0.08	0
	0	0.0856639		0	0	0.0270585		0	0		0	0.0358229	0.0523939				0.0495299	0.54275	0	0.366517		0.002	0.027	0.01	0	0.07	0
	0	0.0877626		0	0	0.0275291		0	0		0	0.0362666	0.0536819				0.0516606	0.561998	0	0.369468		0.014	0.126	0	0.01	0.06	0.13
	0	0.0919522		0	0	0.0280045		0	0		0	0.0363806	0				0.0633149	0.761101	0	0.372204		0.001	0.013	0.01	0.02	0.02	0
	0	0.0929378		0	0	0.0281565		0	0		0	0.0363892	0.0141194				0.0767928	0.893413	0	0.375523		0.052	0.053	0.15	0	0.13	0.01
	0	0.094115		0	0	0.0301396		0	0		0	0.0370877	0				0.0865973	1.09788	0	0.382472		0.036	0.149	0.01	0.16	0.11	0.01
	0	0.0943737		0	0	0.0304789		0	0		0	0.0374944	0				0.347533	1.41775	0	0.382629		0.015	0.005	0.04	0.2	0.06	0.01
	0	0.097374		0	0	0.0325456		0	0		0	0.0375962	0				0.411666	1.47117	0	0.384786		0.024	0.213	0.14	0.01	0.12	0
	0	0.098193		0	0	0.0328923		0	0		0	0.038418	0				0.443006	1.60487	0	0.388163		0.004	0.005	0.14	0.01	0	0
	0	0.101964		0	0	0.033225		0	0		0	0.0397103	0				0.642043	1.88705	0	0.390767		0.171	0.039	0.24	0	0	0.08
	0	0.103805		0	0	0.0373826		0	0		0	0.0407735	0				1.67692	3.0317	0	0.398507		0.029	0.057	0.48	0	0.14	0.01
	0	0.109173		0	0	0.0389751		0	0		0	0.0411841	0.0142256					0	0	0.401068		0.006	0.038	0	0.01	0.01	0.01
	0	0.115667		0	0	0.0402061		0	0		0	0.0412931	0.0142666					0	0	0.41526		0.018	0.035	0	0.09	0.01	0
	0	0.117955		0	0	0.0417367		0	0		0	0.0415971	0					0	0	0.419958		0.003	0.001	0.11	0.07	0.02	0.14
	0	0.118358		0	0	0.0417868		0	0		0	0.0422351	0					0	0	0.421043		0.002	0.091	0	0.01	0.06	0.03
	0	0.119542		0	0	0.0420088		0	0		0	0.0425924	0					0	0	0.433809		0.002	0.035	0.12	0.01	0.08	0.01
	0	0.119579		0	0	0.0429121		0	0		0	0.0426284	0					0	0	0.441101		0.02	0.001	0.01	0.23	0.16	0.06
	0	0.122002		0	0	0.043534		0	0		0	0.0427078	0.0142956					0	0	0.447469		0.006	0.036	0.02	0	0.08	0.05
	0	0.122193		0	0	0.0436772		0	0		0	0.04395	0					0	0	0.45421		0.021	0.019	0.1	0	0.09	0
	0	0.124114		0	0	0.0437686		0	0		0	0.045187	0					0	0	0.456323		0.001	0.016	0.02	0	0.08	0
	0	0.127185		0	0	0.0467464		0	0		0	0.0452519	0.0142972					0	0	0.458947		0.073	0.005	0.01	0.13	0.07	0.26
	0	0.13263		0	0	0.0482508		0	0		0	0.0461056	0					0	0	0.465688		0.113	0.026	0.02	0	0.19	0.01
	0	0.134203		0	0	0.0490321		0	0		0	0.0477097	0					0	0	0.481168		0.013	0.143	0.02	0	0.11	0.07
	0	0.136111		0	0	0.0517723		0	0		0	0.0480819	0					0	0	0.483103		0.103	0.006	1.05	0.03	0.01	0.02
	0	0.139155		0	0	0.0522847		0	0		0	0.0485766	0					0	0	0.486202		0.015	0.061	0	0.01	0.1	0.04
	0	0.140035		0	0	0.0527762		0	0		0	0.048577	0					0	0	0.488422		0.015	0.203	0.01	0.03	0.59	0
	0	0.141938		0	0	0.0540033		0	0		0	0.0491415	0					0	0	0.491277		0.033	0.008	0.01	0.11	0.01	0.05
	0	0.145926		0	0	0.0541301		0	0		0	0.049228	0					0	0	0.491533		0.557	0.286	0.01	0.04	0.02	0
	0	0.145992		0	0	0.0544963		0	0		0	0.049579	0					0	0	0.495697		0.199	0.024	0	0.05	0	0
	0	0.150543		0	0	0.0559477		0	0		0	0.0496886	0					0	0	0.527202		0.011	0.127	2.22	0.02	0.01	0.04
	0	0.15752		0	0	0.0578653		0	0		0	0.0500032	0.0143898					0	0	0.546378		0.003	0.029	0.22	0	0.01	0.01
	0	0.158566		0	0	0.0579489		0	0		0	0.0508055	0					0	0	0.552394		0.002	0.002	0.01	0.06	0.01	0.05
	0	0.158836		0	0	0.0581872		0	0		0	0.05188	0					0	0	0.558786		0.004	0.102	0.05	0	0	0.03
	0	0.15999		0	0	0.0594792		0	0		0	0.0521859	0					0	0	0.560862		0.02	0.031	0.21	0.02	0.19	0.03
	0	0.160111		0	0	0.0599951		0	0		0	0.053039	0					0	0	0.566937		0.378	0.036	0.01	0	0.03	1.27
	0	0.163173		0	0	0.060063		0	0		0	0.0536057	0					0	0	0.590638		0.017	0.035	0.05	0.03	0.08	0.04
	0	0.168136		0	0	0.0601447		0	0		0	0.0537544	0.0144979					0	0	0.591526		0.107	0.023	0.14	0.08	0.05	0.12
	0	0.168881		0	0	0.0621346		0	0		0	0.0539764	0.0148838					0	0	0.594042		0.214	0.11	0.01	0	0	0.01
	0	0.173829		0	0	0.0624067		0	0		0	0.0540967	0					0	0	0.597139		0.051	0.001	0	0.03	0.01	0
	0	0.175812		0	0	0.0654374		0	0		0	0.0550067	0					0	0	0.627062		0.092	0.041	0.06	0	1.73	0
	0	0.177441		0	0	0.0656604		0	0		0	0.0554438	0					0	0	0.63531		0.245	0.028	0	0.85	0.04	0.01
	0	0.177562		0	0	0.0719593		0	0		0	0.0562964	0					0	0	0.640515		0.099	0.025	0.03	0	0.04	0.01
	0	0.179599		0	0	0.0724618		0	0		0	0.0564141	0					0	0	0.653678		0.051	0.044	0.11	0	0.15	0.02
	0	0.184337		0	0	0.0727971		0	0		0	0.05642	0					0	0	0.684625		0.422	0.047	0.06	0.16	0.08	0
	0	0.192838		0	0	0.0734611		0	0		0	0.056458	0					0	0	0.698079		0.019	0.038	0.06	0.02	0.07	0
	0	0.196222		0	0	0.0744368		0	0		0	0.057027	0					0	0	0.705642		0.005	0.039	0.03	0	0	0.21
	0	0.197809		0	0	0.0775747		0	0		0	0.0573237	0					0	0	0.71443		0.023	0.007	0.01	0	0	0.05
	0	0.200672		0	0	0.0777076		0	0		0	0.0578681	0					0	0	0.715664		0.041	0.043	0.43	0	0.02	0.06
	0	0.203017		0	0	0.0783618		0	0		0	0.0581598	0					0	0	0.716839		0.005	0.002	0.05	0	0.64	0
	0	0.214109		0	0	0.0789486		0	0		0	0.0588448	0					0	0	0.72094		0.005	0.002	0.04	0.07	0	0
	0	0.218048		0	0	0.0796756		0	0		0	0.0600132	0					0	0	0.72681		0.251	0.038	0.01	0	0	0.01
	0	0.223908		0	0	0.0800368		0	0		0	0.0603289	0.0149934					0	0	0.728896		0.003	0.008	0.07	0.01	0.12	0.29
	0	0.226072		0	0	0.0811782		0	0		0	0.0617259	0					0	0	0.743011		0.016	0.009	0.03	0.01	0	0
	0	0.226302		0	0	0.0819891		0	0		0	0.0619204	0					0	0	0.759087		0.192	0.032	0.01	0	0.01	0
	0	0.241409		0	0	0.0846404		0	0		0	0.0620696	0					0	0	0.772584		0.154	0.005	0.02	0.23	0.29	0.01
	0	0.250974		0	0	0.0860425		0	0		0	0.0622774	0.0150361					0	0	0.784296		0.002	0.002	0	0.02	0.15	0.01
	0	0.252545		0	0	0.0860738		0	0		0	0.0624367	0					0	0	0.788579		0.002	0.037	0	0.03	0.14	0.02
	0	0.255363		0	0	0.0862167		0	0		0	0.0628746	0					0	0	0.798806		0.079	0.04	0.12	0.01	0.01	0.07
	0	0.258724		0	0	0.0878586		0	0		0	0.0634689	0					0	0	0.815807		0.033	0.059	0.13	0	0.01	0.02
	0	0.261729		0	0	0.0885337		0	6.24e-05		0	0.0635606	0					0	0	0.823639		0.008	0.017	0.01	0	0.12	0.08
	0	0.26274		0	0	0.088868		0	0.000124957		0	0.064687	0					0	0	0.825216		0.15	0.01	0.07	0.07	0.02	0.02
	0	0.295556		0	0	0.09		0	0.000185197		0	0.064982	0					0	0	0.841723		0.003	0.111	0.07	0	0.04	0.02
	0	0.310719		0	0	0.0906764		0	0.000436929		0	0.0651256	0					0	0	0.84918		0.004	0.027	0	0.01	0.01	0
	0	0.317863		0	0	0.0907807		0	0.000497624		0	0.0653184	0					0	0	0.850053		0.154	0.049	0.07	0	0	0
	0	0.327923		0	0	0.097472		0	0.000999415		0	0.0655315	0					0	0	0.851978		0.018	0.002	0.11	0.01	0.26	0
	0	0.339352		0	0	0.0999948		0	0.00142525		0	0.0662311	0					0	0	0.853283		0	0.006	0.49	0.44	0	0.02
	0	0.347272		0	0	0.100881		0	0.00155422		0	0.0663831	0					0	0	0.878057		0.003	0.048	0	0	0.01	0.05
	0	0.351022		0	0	0.101417		0	0.00166677		0	0.0664168	0.0150374					0	0	0.888061		0.006	0.008	0	0.03	1.79	0
	0	0.376286		0	0	0.101494		0	0.00218347		0	0.0675619	0					0	0	0.898834		0.001	0.076	0.04	0.01	0.09	0.04
	0	0.38189		0	0	0.102734		0	0.00222582		0	0.0710496	0					0	0	0.923885		0.003	0.011	0.01	0.3	0.01	0.06
	0	0.382075		0	0	0.103481		0	0.00230334		0	0.0711164	0					0	0	0.937393		0.002	0.029	0.01	0	0.09	0
	0	0.385247		0	0	0.103625		0	0.00249166		0	0.0711587	0					0	0	1.0051		0.015	0.012	0.01	0.02	0.01	0
	0	0.390713		0	0	0.103631		0	0.00305727		0	0.0715146	0					0	0	1.00624		0.013	0.04	0.46	0.03	0.04	0.03
	0	0.40205		0	0	0.10405		0	0.0034255		0	0.0722728	0					0	0	1.06942		0.027	0.002	0.03	0.48	0.02	0
	0	0.404662		0	0	0.105347		0	0.00360185		0	0.0725404	0					0	0	1.07622		0.029	0.157	0.03	0.13	0.08	0.05
	0	0.411694		0	0	0.106496		0	0.00393613		0	0.0726224	0					0	0	1.07694		0	0.001	0.08	0	0.05	0.01
	0	0.535168		0	0	0.107811		0	0.0039866		0	0.0728012	0					0	0.000494646	1.09009		0.003	0.017	3.83	0	0	0.02
	0	0.543494		0	0	0.108373		0	0.00404561		0	0.0729327	0					0	0.000498325	1.11807		0.006	0.013	0.01	0.03	0.02	0.05
	0	0.546251		0	0	0.112553		0	0.00410764		0	0.0729457	0					0	0.000560564	1.14596		0.022	0.003	0.07	0	0.03	0.11
	0	0.557006		0	0	0.112616		0	0.00425085		0	0.0730127	0					0	0.000811074	1.16956		0.05	0.002	0.02	0.01	0.03	0
	0	0.559853		0	0	0.114552		0	0.00429538		0	0.0730539	0					0	0.000873465	1.20257		0.003	0.019	0.01	0	0.1	0.06
	0	0.562788		0	0	0.11772		0	0.0049882		0	0.0747288	0.0152714					0	0.000874692	1.23512		0.002	0.002	0	0	0.07	0.12
	0	0.581097		0	0	0.119148		0	0.00755284		0	0.0751459	0.0536833					0	0.00105894	1.35224		0.184	0.102	0.06	0.03	0.01	0.14
	0	0.59669		0	0	0.119197		0	0.00759757		0	0.0772668	0					0	0.00236378	1.42815		0.038	0.012	0	0.05	0	0
	0	0.598089		0	0	0.119771		0	0.00967235		0	0.0773547	0					0	0.00291002	1.4367		0.001	0.031	0.04	0.2	0.03	0
	0	0.614871		0	0	0.121479		0	0.0107972		0	0.0776954	0					0	0.00297712	1.44193			0.066	0.01	0	0.1	0
	0	0.61584		0	0	0.123154		0	0.0121009		0	0.0780134	0					0	0.00330837	1.45358			0.045	0.13	0.16	0.05	0.03
	0	0.621265		0	0	0.125781		0	0.0128705		0	0.0796275	0					0	0.00386067	1.46571			0.382	0.03	0.01	0.06	0
	0	0.632642		0	0	0.127336		0	0.013969		0	0.0809134	0					0	0.00406109	1.48051				0.03	0.02	0.05	0.06
	0	0.633503		0	0	0.127357		0	0.0154845		0	0.0811433	0.0153714					0	0.00446089	1.50162				0.33	0.26	0.05	0.01
	0	0.649558		0	0	0.12753		0	0.0157334		0	0.0814851	0.0154655					0	0.00565982	1.51042				0.16	0	0.04	0.01
	0	0.663579		0	0	0.127748		0	0.0181641		0	0.0821079	0					0	0.00585919	1.54294				0.03	0.07	0.02	0.09
	0	0.697109		0	0	0.127887		0	0.0190609		0	0.0834863	0					0	0.00609377	1.56909				0.01	0.05	0.01	0.01
	0	0.709475		0	0	0.13094		0	0.0218082		0	0.0847747	0					0	0.00655125	1.57105				0.12	0.01	0.04	0
	0	0.722393		0	0	0.134774		0	0.0236181		0	0.0848415	0					0	0.0066454	1.67193				0.01	0.39	0.04	0.06
	0	0.726006		0	0	0.1349		0	0.0244371		0	0.084943	0					0	0.00740875	1.67434				0.06	0.13	0.01	0.06
	0	0.743498		0	0	0.13614		0	0.0267826		0	0.085542	0					0	0.00752638	1.75127				0.08	0.12	0	0.1
	0	0.780204		0	0	0.137442		0	0.0282979		0	0.0862098	0.0158056					0	0.00862538	1.82218				0.11	0.16	0.05	0.29
	0	0.780257		0	0	0.139876		0	0.0289413		0	0.0866384	0.0163591					0	0.00899188	1.8229				0	0	0.01	0.02
	0	0.791146		0	0	0.140976		0	0.0344901		0	0.0867825	0					0	0.00930454	1.85425				0.02	0.09	0.02	2.16
	0	0.7954		0	0	0.142666		0	0.0345746		0	0.0885238	0					0	0.00931018	1.96895				0.47	0.17	0.01	0
	0	0.815414		0	0	0.144291		0	0.0353863		0	0.0892571	0					0	0.00963045	2.02426				0.21	0.02	0.14	0.17
	0	0.938088		0	0	0.147171		0	0.0380403		0	0.0900668	0.0165012					0	0.0100838	2.20916				0.1	0	0	0.01
	0	0.966026		0	0	0.147235		0	0.0380501		0	0.0917085	0					0	0.0121144	2.2212				0	0	0.01
	0	0.975455		0	0	0.147671		0	0.0415228		0	0.0924625	0					0	0.0134554	2.25293				0.02	0.01	0.17
	0	0.977569		0	0	0.148123		0	0.0416767		6.2e-05	0.0926523	0					0	0.0164093	2.33285				0.11	0.23	0.2
	0	0.982645		0	0	0.149639		0	0.0424148		0.000123938	0.0930671	0.0538401					0	0.0219989	2.34571				0.13	0.02	0.01
	0	1.03357		0	0	0.153845		0	0.0437553		0.000624521	0.0931178	0					0	0.0225732	2.98986				0.01	0	0
	0	1.13315		0	0	0.15742		0	0.0440485		0.00105894	0.0934504	0					0	0.0241761	3.11164				0.01	0.07	0.1
	0	1.18331		0	0	0.157712		0	0.0478104		0.00129049	0.0939136	0.0166468					0	0.0253446	3.11562				0.02	0.01	0
	0	1.20127		0	0	0.157993		0	0.0486532		0.00193083	0.0939779	0.0166797					0	0.0263216	3.17752				0	0.05	2.26
	0	1.24031		0	0	0.158226		0	0.0489589		0.0019338	0.0955179	0					0	0.0297144	3.29719				2.28	0.01	0.05
	0	1.27013		0	0	0.158982		0	0.0562642		0.00272633	0.095706	0.0167282					0	0.0319156	3.45927				0.33	0.02	0.07
	0	1.33298		0	0	0.162839		0	0.0567784		0.00361309	0.095739	0					0	0.0438814	3.51759				0.05	0.02	0.07
	0	1.36097		0	0	0.163298		0	0.0574697		0.00442284	0.0967164	0					0	0.0467766	3.94955				0.08	0	0.02
	0	1.40941		0	0	0.163527		0	0.0576631		0.00505564	0.0980881	0					0	0.0483009	3.97315				0	0.02	0.03
	0	1.4536		0	0	0.165161		0	0.0591073		0.00516567	0.0981432	0					0	0.0484502	4.33381				0.23	0.01	0.02
	0	1.55924		0	0	0.166769		0	0.0657197		0.00572993	0.0990288	0					0	0.0517579	4.39912				0.01	0	0.06
	0	1.64382		0	0	0.170671		0	0.0683164		0.00711862	0.099673	0					0	0.0549828	4.4083				0.11	0.01	0.01
	0	1.73159		0	0	0.171706		0	0.0687801		0.00780192	0.101715	0					0	0.0625893	5.44366				0.38	0.09	0.01
	0	1.84884		0	0	0.173647		0	0.0775849		0.0079913	0.102036	0					0	0.0631764	5.5304				0.01	0.09	0.01
	0	1.90232		0	0	0.17366		0	0.0878039		0.0093421	0.104419	0.0167661					0	0.067233	9.46172				0.29	0	0.03
	0	2.01269		0	0	0.175323		0	0.0916005		0.0101971	0.105169	0					0	0.0672697	9.82195				0.01	0.14	0
	0	2.22379		0	0	0.176103		0	0.0959746		0.0119868	0.105336	0.0549942					0	0.06784					0.32	0.21	0.04
	0	2.22458		0	0	0.177136		0	0.0969044		0.0130498	0.105979	0					0	0.0739312					0.02	0.02	0
	0	2.41851		0	0	0.178129		0	0.0983929		0.0155771	0.106683	0					0	0.082546					0	0.05	0.01
	0	2.55665		0	0	0.180118		0	0.111278		0.0170801	0.108283	0.0553122					0	0.0965672					0.14	0	0
	0	2.67876		0	0	0.1815		0	0.117066		0.0181437	0.108439	0					0	0.122175					0.24	0.03	0
	0	3.05269		0	0	0.185136		0	0.122699		0.0243732	0.10872	0					0	0.123406					0.04	0.01	0.02
	0	3.46901		0	0	0.185387		0	0.12827		0.0259169	0.108968	0					0	0.137899					0.28	0.23	0.01
	0	3.57099		0	0	0.188213		0	0.130519		0.0262095	0.109247	0					0	0.140965					0.01	0	0.01
	0	3.68237		0	0	0.196561		0	0.130947		0.0269571	0.10964	0					0	0.148858					0.05	0	0.01
	0	3.77029		0	0	0.196988		0	0.131137		0.0311425	0.113254	0.0554304					0	0.152001					0.34	0.01	0.01
	0	4.10744		0	0	0.203288		0	0.140677		0.0316087	0.113411	0.0168428					0	0.177515					0.01	0.22	0.01
	0	4.19943		0	0	0.20397		0	0.144004		0.0352782	0.11377	0.0176554					0	0.184285					0.09	0	0.07
	0	8.05685		0	0	0.205972		0	0.145263		0.04058	0.114633	0.0176562					0	0.215762					0	0	0.02
	6.18e-05	0		0	0	0.20672		0	0.16782		0.0417349	0.115334	0.018251					0	0.246282					0.16	0	0.02
	6.2e-05	0.267266		0	0	0.207274		0	0.19656		0.0438154	0.115883	0					0	0.282261					0.02	0.23	0.01
	6.21e-05	0		0	0	0.208788		0	0.211276		0.0494311	0.1161	0					0	0.303538					0.02	0.01	0.01
	6.22e-05	0.00373952		0	0	0.209387		0	0.216402		0.0524833	0.117007	0					0	0.343633					0.09	0.01	0.01
	6.25e-05	0		0	0	0.21048		0	0.223872		0.0559695	0.117048	0					0						0	0.01	0
	0.0001245	0		0	0	0.214397		0	0.228613		0.0598437	0.117048	0					0						0.28	0.07	0.03
	0.000184972	0.0130822		0	0	0.216517		0	0.234633		0.0610849	0.117172	0					0						0.11	0.05	0.02
	0.000186491	0		0	0	0.221923		0	0.245178		0.0660221	0.117511	0					0						0.09	0.01	0
	0.000248089	0		0	0	0.222597		0	0.254924		0.0679634	0.119008	0.055929					0						0.13	0	0.01
	0.000248812	0.00434746		0	0	0.227913		0	0.26561		0.0760362	0.120016	0					0						0.07	0.17	0.01
	0.000249239	0.0616871		0	0	0.230308		0	0.279556		0.0847442	0.120032	0.0183911					0						0.03	0.16	0.01
	0.000249448	0		0	0	0.230419		0	0.280285		0.0984602	0.120294	0.056172					0						0.02	0.13	0.01
	0.000312145	0		0	0	0.232658		0	0.366154		0.135569	0.120572	0.0186018					0						0.07	0.01	0.02
	0.000436503	0.0542673		0	0	0.241643		0	0.375433		0.138635	0.12102	0					0						0.06	0.16	0.04
	0.000436967	0.00124703		0	0	0.241966		0	0.384481		0.176415	0.121983	0					0						0.04	0.2	0.02
	0.0004988	0.145137		0	0	0.249655		0	0.464313		0.20039	0.12212	0.0561738					0						0	0	0.09
	0.000551062	0.0891096		0	0	0.250832		0	0.481131		0.202525	0.122468	0					0						0.02	0.12	0.01
	0.000555599	0.248854		0	0	0.251326		0	0.669985		0.218589	0.123065	0					0						0.01	0.02	0.01
	0.000559345	0.000249627		0	0	0.255498		0	0.691666		0.335432	0.123243	0.0186727					0						0.01	0.04	0.02
	0.000561017	0		0	0	0.257024		0	0.716487		0.345993	0.126032	0					0						0.02	0.24	0
	0.000621065	0		0	0	0.257394		0	0.795964		0.363856	0.126178	0					0						0.02	0.02	0.02
	0.000622779	0		0	0	0.261052		0	0.871916		0.382674	0.126187	0					0						0.14	0	0.02
	0.000622953	0.721764		0	0	0.261308		0	0.903982		0.3854	0.127454	0					0						0.01	0.01	2.45
	0.000625045	0		0	0	0.272698		0			0.469958	0.12828	0					6.22e-05						0.14	0	0
	0.000685994	0		0	0	0.273324		0			0.679795	0.129516	0					0.000559534						0.13	0.52	0
	0.000686451	0		0	0	0.28016		0			0.906028	0.129747	0					0.00105583						0.04	0.28	0.02
	0.000809817	0.108577		0	0	0.281306		0			1.03646	0.129856	0.0192723					0.00123949						0.01	0.08	0.01
	0.000874217	0.233075		0	0	0.282101		0			1.06412	0.130039	0					0.00211321						0.09	0.01	0.39
	0.000875063	0.00711628		0	0	0.284147		0				0.132101	0.0192906					0.00211407						0	0.03	0.02
	0.000936039	0		0	0	0.284849		0				0.132113	0					0.00218017						0.33	0.02	0.01
	0.000938008	0		0	0	0.286275		0				0.132677	0.0562687					0.00255252						0	0.05	0
	0.00104945	0		0	0	0.28935		0				0.134236	0					0.0026099						0.19	0.07	0.01
	0.0010618	0.142746		0	0	0.289786		0				0.134423	0					0.0029368						0.07	0.02	1.36
	0.00111696	0.328238		0	0	0.292378		0				0.13651	0.019667					0.00298885						0	0.22	0.05
	0.00112365	0		0	0	0.292766		0				0.136726	0.0200445					0.00373704						0.27	0.35	0.01
	0.00112375	0		0	0	0.295153		0				0.138352	0					0.00423348						0.9	0	0.53
	0.00118043	0.00081094		0	0	0.302018		0				0.139987	0					0.00560616						0	0.03	0.1
	0.0011816	0		0	0	0.30203		0				0.140242	0					0.00561748						0.01	0.03	0.04
	0.00121716	0.203021		0	0	0.315137		0				0.142179	0					0.00580284						0.05	0.27	0.19
	0.00128098	0.00393059		0	0	0.318526		0				0.142557	0					0.00592322						0.07	0.01	0
	0.00137046	0.00498198		0	0	0.320791		0				0.142694	0					0.00709929						0	0.07	0.02
	0.00138536	0.00493172		0	0	0.322821		0				0.143358	0					0.00789948						0	0.01	0.02
	0.00143237	0.0182153		0	0	0.328594		0				0.143687	0					0.0095908						0.01	0.07	0
	0.00149987	0		0	0	0.330411		0				0.14678	0					0.0104026						0.18	0.14	0.01
	0.00155742	0.0480196		0	0	0.3329		0				0.14878	0					0.0125011						0.52	0	0.01
	0.00162249	0		0	0	0.336994		0				0.149379	0					0.0135097						0.01	0.01	0.18
	0.00168545	0		0	0	0.338039		0				0.154998	0					0.0137187						0.58	0.01	0
	0.00175054	0.269385		0	0	0.343901		0				0.158783	0					0.0143946						0.02	0.03	0.14
	0.00180606	0		0	0	0.345761		0				0.159946	0.0569975					0.0157394						0.05	0.01	0.03
	0.00193028	0		0	0	0.350416		0				0.162279	0					0.0159154						0.02	0.08	0.01
	0.00199339	0		0	0	0.353836		0				0.163103	0					0.0160164						0.01	0.01	0.05
	0.00203717	0		0	0	0.362475		0				0.163118	0					0.0168965						0.13	2.12	0.02
	0.0021862	0.0285994		0	0	0.369119		0				0.164534	0					0.0170203						0.09	0.01	0.13
	0.0023647	0.0558		0	0	0.374492		0				0.166694	0					0.0193377						0.05	0.1	0.06
	0.00236941	0.0333159		0	0	0.38108		0				0.168392	0					0.0227557						0.02	0.48	0.02
	0.00239376	0.0665654		0	0	0.387779		0				0.169115	0					0.0270028						0.03	0.01	0
	0.00242075	0.0175265		0	0	0.391419		0				0.169603	0					0.0319115						0.4	0.05	0.02
	0.00248344	0		0	0	0.392691		0				0.171427	0					0.0320889						0	0.84	0.02
	0.00249181	0		0	0	0.401943		0				0.172087	0					0.0323111						0.01	0.15	0.02
	0.00255937	0.111299		0	0	0.401996		0				0.174605	0					0.0361204						0.47	0.08	0.14
	0.00260841	0		0	0	0.408257		0				0.175571	0					0.0365812						0.03	0	0.13
	0.00266425	0.149885		0	0	0.409772		0				0.176615	0.0204092					0.0383341						0	0.14	0.01
	0.00266466	0		0	0	0.435986		0				0.178207	0					0.0395685						0.27	0	0.12
	0.00267058	0		0	0	0.436663		0				0.179965	0.0212646					0.0403268						0.07	0.01	0
	0.00274183	0		0	0	0.437855		0				0.180183	0					0.0528848						0.01	0.05	0.01
	0.00302489	0		0	0	0.442791		0				0.180232	0					0.0539468						0.01	0.03	0.22
	0.0030285	0		0	0	0.44326		0				0.180921	0					0.0544896						0.04	0.01	0.03
	0.00316048	0		0	0	0.444007		0				0.181228	0.0217092					0.0549915						0	0.02	0.45
	0.00318381	0		0	0	0.446419		0				0.181392	0.0578695					0.0555648						0.36	0.03	0
	0.00333116	0		0	0	0.446436		0				0.18298	0.0217742					0.055872						0.49	0.09	0
	0.00337272	0		0	0	0.456141		0				0.187145	0					0.0578667						0.07	0.31	4.72
	0.0034326	0		0	0	0.465465		0				0.189177	0.0220587					0.0588867						0	0.07	0.13
	0.00362124	0.0779045		0	0	0.46984		0				0.189871	0					0.0595355						0	0	0.03
	0.00368864	0		0	0	0.474862		0				0.190545	0					0.0601846						0	0.01	0.02
	0.00383335	0		0	0	0.47551		6.21e-05				0.192815	0.0221709					0.0655783						0	0.12	0.46
	0.00387027	0		0	0	0.478279		6.21e-05				0.193018	0.022172					0.0676814						0.1	0.09	0.01
	0.00397699	0.0104796		0	0	0.479141		6.23e-05				0.193682	0					0.0688258						0.08	0	2.12
	0.00398248	0		0	0	0.48283		6.23e-05				0.194923	0					0.0704737						0.09	0.02	0
	0.00434378	0.628422		0	0	0.489935		6.26e-05				0.195166	0					0.0704964						0	0.3	0.01
	0.00439491	0.29047		0	0	0.49164		0.000124559				0.20011	0.0222487					0.0717581						0.36	0.32	0.01
	0.00449175	0.00792065		0	0	0.522978		0.000124592				0.200434	0					0.0744408						0.01	0.69	0
	0.00450139	0		0	0	0.524871		0.000124677				0.20147	0					0.0805816						0	0.02	0.01
	0.00474636	0		0	0	0.528129		0.000125264				0.201639	0					0.0863168						0.02	0.01	0.01
	0.00477068	0		0	0	0.557934		0.000186422				0.201656	0					0.0923315						0.12	0.11	0.13
	0.0052344	0		0	0	0.557953		0.000187174				0.201902	0.0222882					0.0993094						0.14	0.03	0.01
	0.00534873	0		0	0	0.56637		0.000187239				0.20602	0					0.103492						0.04	0	0.86
	0.00560564	0		0	0	0.576031		0.000196607				0.206171	0.058001					0.103904						0.23	0.11	0.01
	0.00591264	1.96332		0	0	0.603381		0.00024785				0.20633	0					0.104432						0.22	0	0.04
	0.00603287	0.206244		0	0	0.60499		0.000248781				0.209189	0					0.106438						0.01	0.01	0.07
	0.0061049	0		0	0	0.612626		0.000248812				0.211997	0					0.109806						0.14	0.01	0.01
	0.0061262	0		0	0	0.617316		0.000374577				0.214463	0					0.110493						0	0.1	0.06
	0.00635844	0.409291		0	0	0.621773		0.00037482				0.214698	0					0.118258						0.35	0	0.03
	0.00641624	0		0	0	0.625856		0.000408736				0.214746	0					0.120845						0.06	0.17	0.04
	0.00641837	0		0	0	0.629644		0.00041846				0.21502	0					0.121601						0.02	0.04	0.21
	0.00641845	0		0	0	0.634839		0.000433548				0.21668	0					0.125873						0	0.06	0.03
	0.00648177	0		0	0	0.670784		0.00043645				0.218996	0					0.126284						0	0.17	0.01
	0.00649418	0.000123914		0	0	0.683132		0.000497069				0.223035	0.0586563					0.134642						0.04	0.2	0.03
	0.00667567	0		0	0	0.685507		0.000498722				0.226189	0.0589409					0.137504						0.03	0.05	0.01
	0.00678321	0		0	0	0.687784		0.000499553				0.226344	0					0.139219						0.73	0.07	0.08
	0.00693964	0.0265449		0	0	0.710727		0.000540364				0.226618	0.0596219					0.153855						0.02	0.01	0.03
	0.00696612	0		0	0	0.722202		0.000560912				0.229851	0.0223664					0.15941						0	0	0.56
	0.00705495	0		0	0	0.748021		0.000624199				0.229882	0					0.16761						0.06	0.01	0
	0.00730449	0		0	0	0.750363		0.000678152				0.230338	0.0603062					0.170194						0	0.13	0.01
	0.00734834	0.270427		0	0	0.75285		0.000685793				0.23097	0					0.173608						0.47	0.16	0.02
	0.00735064	0.0321117		0	0	0.762308		0.000746507				0.231024	0					0.175396						0.01	0.07	0
	0.00741744	0.0277198		0	0	0.772579		0.000808738				0.232906	0.0604368					0.205083						0.02	0.04	0.02
	0.00747934	0.0379611		0	0	0.793154		0.000867598				0.233449	0					0.241478						0.02	0.25	0
	0.00753789	0		0	0	0.803675		0.000876868				0.233733	0					0.243886						0.03	3.33	0.32
	0.00755531	0		0	0	0.811803		0.000933045				0.234466	0					0.275732						0.02	0.04	0.06
	0.00758229	0		0	0	0.819708		0.000934442				0.236595	0.0223695					0.277842						0.76	0.01	0
	0.00770653	0.00087211		0	0	0.833203		0.000935475				0.241926	0					0.282702						0.02	0	0.46
	0.00809785	0		0	0	0.874514		0.000939482				0.242015	0.0223945					0.284944						0.01	0.11	0
	0.00809786	0		0	0	0.887283		0.00099131				0.245437	0					0.292349						0.13	0.14	0.08
	0.00821477	0		0	0	0.887632		0.000993704				0.248785	0					0.315823						0.01	0	0
	0.00854747	0		0	0	0.960987		0.000997305				0.25337	0.0224113					0.324827						0.01	0.01	0
	0.00855005	0		0	0	0.972282		0.00105327				0.25718	0					0.354743						0.2	0.1	0
	0.00867226	0		0	0	1.03371		0.00110471				0.259406	0.0224648					0.363792						0.02	0.05	0.01
	0.00876796	0.265668		0	0	1.03891		0.0011227				0.26184	0.0229596					0.367508						0	0.02	0.03
	0.00901293	0.0129045		0	0	1.07742		0.00112402				0.266465	0					0.391785						0	0.03	0.02
	0.009115	0		0	0	1.08042		0.00112414				0.270756	0					0.39368						0.14	0.01	0.28
	0.00925387	0		0	0	1.12991		0.00118546				0.275855	0					0.421203						0.18	0.48	0
	0.00943389	0.00363764		0	0	1.14013		0.00123577				0.277299	0.0607194					0.461272						0	0.93	0
	0.00948081	0		0	0	1.22867		0.00123914				0.277378	0.0232015					0.461948						0.06	0.07	0.05
	0.00961639	0		0	0	1.251		0.00130429				0.277522	0					0.483285						0.18	0.25	0.41
	0.00962191	0		0	0	1.2661		0.00130457				0.279497	0					0.493702						0.19	0.17	0.13
	0.00969645	0		0	0	1.2676		0.00136988				0.279596	0					0.593678						0.01	0.01	0.03
	0.00982509	0.452083		0	0	1.27264		0.00137259				0.280067	0					0.600195						0	0.02	0.1
	0.00988893	0		0	0	1.28811		0.00155136				0.286565	0.0239202					0.690473						0.01	0.65	1.25
	0.00999933	0		0	0	1.30283		0.00155527				0.286806	0					0.731999						0.01	0.26	0.01
	0.0110305	0		0	0	1.31694		0.00155641				0.293159	0.0241991					0.817525						0	0.12	0.07
	0.0112128	0		0	0	1.35555		0.0015598				0.293563	0					0.850187						0.02	0.17	0.5
	0.011249	0		0	0	1.37659		0.00161816				0.300196	0					0.874778						0.55	0.02	0.01
	0.0115251	0		0	0	1.3895		0.00162508				0.301049	0					0.884828						0.01	0.1	0.04
	0.0124136	5.1352		0	0	1.42437		0.0016789				0.308357	0					0.987124						2.32	0.03	0.84
	0.0124603	0		0	0	1.44995		0.00173641				0.308791	0					1.18503						0.35	0.07	0
	0.012564	0		0	0	1.49689		0.00212195				0.312391	0					1.30117						0.01	0.01	0.02
	0.0129382	0.108802		0	0	1.50775		0.00218191				0.315056	0.0619624					3.52655						0	0	0.1
	0.0131968	0		0	0	1.54094		0.00229087				0.316595	0.0244247											0.08	0.02	0.37
	0.0133068	0.00952525		0	0	1.54616		0.00230805				0.317674	0.0621446											0.01	0.03	0.01
	0.0134819	0		0	0	1.54767		0.00249174				0.318057	0.0629873											0.83	0	0.01
	0.0136491	0		0	0	1.69658		0.00249264				0.319694	0											0	0	0.07
	0.0136614	0.0852893		0	0	1.74164		0.0025389				0.320049	0											0.02	0.01	0
	0.013717	0		0	0	1.75119		0.00254949				0.322254	0											0.09	0.02	0.08
	0.0137544	0.0490866		0	0	1.81697		0.00262307				0.325716	0											0.03	0.01	0.63
	0.0138295	0		0	0	1.83679		0.00269654				0.334085	0											0.15	0.13	0.01
	0.0138999	0		0	0	2.03732		0.00273863				0.335748	0											0.08	0.18	0.07
	0.014141	0.56676		0	0	2.26246		0.00286953				0.33795	0											0.62	0.01	0.24
	0.0143946	0		0	0	2.33462		0.0030406				0.339465	0											0.02	0.1	0
	0.0145058	0		0	0	2.48121		0.00305397				0.339795	0											0.39	0	0.07
	0.014796	0.0180375		0	0	2.64631		0.00305708				0.340183	0											0	0.01	0
	0.0148253	0		0	0	2.72871		0.00326746				0.343297	0											0.01	0.18	0
	0.0150985	0		0	0	2.90321		0.00328371				0.344583	0											0.48	0.7	0.06
	0.0151194	0		0	0	2.91035		0.00340763				0.344669	0											0.01	0	0.1
	0.0152196	0.542695		0	0	3.18854		0.00341292				0.345165	0											0.06	0.05	2.37
	0.0152886	0		0	0	3.27459		0.00355297				0.347249	0.0244727											0.04	0.01	0
	0.0155545	0.649785		0	0	3.51925		0.00361858				0.351672	0											0.13	0	0.04
	0.0160991	0		0	0	3.57705		0.00373171				0.353022	0											0.06	0	0.04
	0.0162943	0.00330841		0	0	3.62842		0.00378614				0.353351	0											0	0.04	0.03
	0.0165446	0		0	0	3.79039		0.00383613				0.361053	0.0245015											0.02	0.05	0
	0.0166068	0		0	0	3.90542		0.00392772				0.363972	0											0.24	0.01	0
	0.0171018	0		0	0	3.90972		0.0040383				0.365636	0											0.02	0.01	0
	0.0171927	0		0	0	4.35752		0.00451671				0.365761	0											0.24	0.02	0.01
	0.0173179	0		0	0	4.51228		0.00454134				0.366965	0											0.18	0.02	0.06
	0.0174109	0.000249214		0	0	4.53386		0.00459925				0.369712	0											0	0.04	0.01
	0.0177912	0		0	0	4.63808		0.00472717				0.36988	0											0.26	0.07	0.06
	0.0178336	0		0	0	4.77763		0.00482411				0.370152	0											0.01	0.06	0.06
	0.0178774	0		0	0	4.91711		0.00495109				0.374273	0											0.32	0.11	0
	0.0179174	0		0	0	5.25119		0.00496543				0.377345	0											0.02	0.62	0.01
	0.0180551	0		0	0	7.52417		0.00501381				0.389572	0											0	0.05	0.01
	0.0183741	0.0680136		0	0	7.58717		0.00504804				0.391826	0											0.01	0.02	0.02
	0.0188712	0.33622		0	0	9.16581		0.00547658				0.392249	0											0.32	0.04	0.02
	0.0189241	1.29659		0	0	9.67522		0.00548206				0.396119	0											0.7	0.18	0.01
	0.0189882	0		0	0			0.00555383				0.397451	0.0634359											0.05	0.03	0.03
	0.0191036	0		0	0			0.00559506				0.399904	0											0.69	0.07	0.01
	0.0192312	0.00299204		0	0			0.00564818				0.406328	0											0.07	0	0.01
	0.0193684	0		0	0			0.00567708				0.409792	0											0.01	0.06	0.06
	0.019418	0.0501636		0	0			0.0057276				0.410769	0											1.36	0.06	0.07
	0.0199442	0		0	0			0.00576806				0.412155	6.26e-05											0.01	0.09	0.01
	0.0202221	0		0	0			0.00584727				0.41402	0.0250791											1.04	0.03	0
	0.0202476	0.0793058		0	0			0.00587534				0.418799	0											0.03	0.22	0
	0.0203583	0		0	0			0.00594786				0.420541	0											0.23	0.06	0
	0.0208215	0		0	0			0.00599487				0.423117	0.000124166											0.05	0.05	0.03
	0.021237	0		0	0			0.0060246				0.430221	0											0	0.38	1.61
	0.0213111	0.021224		0	0			0.00633834				0.436326	0.000124441											0.12	0.11	0
	0.0214798	0		0	0			0.00641992				0.443308	0.000124518											0.22	0.13	0.02
	0.0214826	0		0	0			0.00649263				0.445845	0.0255188											0.25	0.06	0.24
	0.0218226	0.0972793		0	0			0.00655547				0.448512	0.0256481											0.03	0.02	0
	0.0220034	0		0	0			0.00667655				0.449592	0.0257556											0.04	0.03	0.01
	0.0220179	0.864002		0	0			0.00681682				0.451174	0.000124868											0	0.07	0.01
	0.0224102	3.3919		0	0			0.0068512				0.45672	0.0640474											0	0.09	0.04
	0.022468	0.0796724		0	0			0.00691708				0.460497	0.0257705											0	0.03	0.17
	0.0226059	0		0	6.2e-05			0.00705825				0.460508	0.0259383											0.01	0.02	0
	0.0229861	0		0	6.21e-05			0.00711692				0.462688	0											0	0.01	0.12
	0.0232218	0		0	6.22e-05			0.00716076				0.462768	0											0.12	0.12	0.08
	0.0233185	0.550943		0	6.24e-05			0.00726646				0.464489	0											0.17	0	0.01
	0.0233303	0.062422		0	6.25e-05			0.0073289				0.466025	0.000125025											0.01	0.01	0
	0.0234059	0		0	0.000124352			0.00749853				0.466391	0											0	0.04	0.01
	0.0234124	0		0	0.000124521			0.00769507				0.467883	0.0259756											0.1	0.02	0
	0.0234813	0.000373437		0	0.000124523			0.00780923				0.469556	0.000185873											0.76	0.01	0.01
	0.023819	0		0	0.000124797			0.00805352				0.472777	0											0.01	0.01	0
	0.0238601	0.00249288		0	0.000124822			0.00840752				0.479329	0.0261028											0.3	0.02	0.01
	0.0241374	0		0	0.000124843			0.0084097				0.48003	0.000187454											0	0.01	0.01
	0.0246178	0		0	0.000124856			0.00850486				0.486516	0.000244927											0.71	0.04	0.88
	0.0246249	0.0239914		0	0.000124878			0.00876123				0.489675	0											0.12	0.06	0
	0.0248053	0		0	0.000249042			0.00891644				0.493935	0											0.05	0.02	0.03
	0.0249845	0.0996591		0	0.000309788			0.00893778				0.497275	0											0.01	0.29	0.01
	0.0254663	0		0	0.000311629			0.0089564				0.49912	0											0.01	0.06	0
	0.0255176	1.42221		0	0.000311969			0.00903341				0.50062	0.000247877											0.01	0.77	2.42
	0.0261089	0		0	0.000370394			0.0092993				0.50191	0.0262602											0.01	0.09	0.01
	0.0261468	0		0	0.000372897			0.00935124				0.502038	0.0263314											0.24	0.01	0
	0.0265138	0.0591499		0	0.000373175			0.00941783				0.502068	0.064848											0.01	0.01	0.1
	0.0268717	0		0	0.000373222			0.00982902				0.505011	0.000249418											0.02	0	0.01
	0.02723	0		0	0.000373677			0.00983718				0.508142	0.000309844											2.05	0.03	0
	0.0275055	0		0	0.000373954			0.0101408				0.523659	0.000310684											0.23	0.04	0.02
	0.0282342	0.398284		0	0.000496775			0.0102229				0.529883	0.000311057											0.23	0.01	0.27
	0.0282988	0		0	0.000555591			0.0103404				0.532002	0											0.01	0.12	0.01
	0.0283716	0		0	0.000557816			0.0105327				0.537472	0.0662818											0.01	0.86	0.04
	0.0287351	0		0	0.000559632			0.0106635				0.540982	0.0263911											0.33	0.14	0.04
	0.0288755	0		0	0.000560593			0.0110792				0.543537	0											0.02	0.01	0
	0.0292971	0		0	0.000560745			0.0113378				0.544755	0.000311185											0.02	0.17	0.03
	0.0293362	0		0	0.000562057			0.0114001				0.546416	0.0264323											0.27	0.04	0.01
	0.0294794	0		0	0.000619569			0.0115494				0.547629	0.000311466											0.04	0.01	0.23
	0.0301185	0		0	0.000622961			0.0118674				0.550082	0.000435378											0.08	0.03	0
	0.0301322	0		0	0.000623938			0.0119097				0.55442	0.0665368											0	0	0
	0.0309507	0		0	0.000685209			0.0123538				0.560683	0.000437032											0	0.06	0.18
	0.0310126	0.0904092		0	0.000747543			0.0124866				0.569324	0.0677998											0.09	0.2	0.95
	0.0311158	0.00822907		0	0.000811439			0.0124904				0.571717	0.067809											0.22	0.01	0.04
	0.0313214	0.0236792		0	0.000811621			0.0127355				0.573974	0.0005585											0.17	0.2	0.01
	0.0319797	0.0428276		0	0.000870092			0.0127648				0.575889	0.000623617											0.03	0.17	0
	0.0329195	0		0	0.000874253			0.0127714				0.577273	0.000625112											0.08	0.05	2.23
	0.0337015	0.497028		0	0.000992867			0.0131896				0.58481	0.0264491											1.18	0.01	0
	0.0338062	0		0	0.000997632			0.0132936				0.584966	0.000740558											0.04	0.08	0.02
	0.035264	0		0	0.00105581			0.0134791				0.59091	0.000741464											0.01	0	0.03
	0.0356229	0.000935245		0	0.00111291			0.0138144				0.595299	0.0265825											1.06	0.01
	0.0358158	0.31336		0	0.00112231			0.013831				0.59747	0.0678973											0.01	0.01
	0.0360019	0		0	0.00112392			0.0138451				0.598408	0.0273504											0.05	0.35
	0.0360528	0		0	0.00118452			0.0138686				0.618579	0.000806883											0.12	0.1
	0.0361281	0.0110487		0	0.00118504			0.0139663				0.621686	0											0	0.02
	0.0361364	0.0915731		0	0.00123916			0.014269				0.636873	0.0686743											0.08	0.01
	0.0361404	0.0297074		0	0.00124888			0.0142891				0.637675	0.000809817											0.07	0.02
	0.0362113	0		0	0.00136305			0.0143147				0.641543	0.0690461											0.21	0.01
	0.0363154	0		0	0.00136837			0.014374				0.644743	0.02749											0.02	0.08
	0.0364559	0		0	0.00137063			0.0145444				0.647359	0.027574											0.01	0.03
	0.0366163	0.267042		0	0.00137187			0.0147376				0.658286	0.027796											0.02	0.11
	0.0368516	0		0	0.00137355			0.015199				0.662463	0.00086561											0.03	0.02
	0.0371229	0		0	0.00143575			0.0153172				0.664194	0.000868767											0.07	0.09
	0.0372753	0		0	0.00143669			0.0153851				0.66771	0.000871592											0.19	0.16
	0.0377588	0.151092		0	0.00143849			0.0154645				0.670798	0											0.06	0.03
	0.0383782	0		0	0.00149359			0.0159198				0.678623	0											0.17	0.08
	0.0391442	0		0	0.00155485			0.0161221				0.691397	0.000873453											0	0.01
	0.0394649	0		0	0.00156036			0.0162498				0.701076	0.0278905											0	0.01
	0.0396939	0		0	0.00167688			0.0164021				0.70323	0.000932108											0.05	0
	0.0399583	0.03564		0	0.00168042			0.0165659				0.709388	0											0.05	0.63
	0.0414376	0.0148963		0	0.00187896			0.0166699				0.715775	0.0282523											0.01	0.01
	0.0415337	0		0	0.00191547			0.0170182				0.719933	0											0.01	0.17
	0.0423611	0.0266405		0	0.00193541			0.0170417				0.725206	0.000996825											1.34	0
	0.0429817	0		0	0.00199005			0.0171783				0.731134	0.0283732											0.11	0.15
	0.043163	0.0281343		0	0.0019977			0.017936				0.73598	0.00100003											0.02	0.33
	0.0437021	0		0	0.00199825			0.0182427				0.738534	0.00105702											2.98	0
	0.044071	0.000748409		0	0.00204458			0.0185305				0.753712	0.00105839											0.03	0.07
	0.0440879	0		0	0.00205888			0.0186905				0.756811	0.00111941											0.02	0.08
	0.0442347	0.521613		0	0.00212496			0.0191865				0.760095	0.0284215											0.94	0.01
	0.0451796	0		0	0.0021816			0.0196838				0.767496	0.0011238											0	0.13
	0.045223	0		0	0.00218273			0.0200791				0.768075	0											0	0.01
	0.045277	0.00385786		0	0.00223444			0.0202301				0.769301	0.0284733											0.14	0.01
	0.0453011	0		0	0.0023008			0.0202615				0.774732	0.0691166											0	0.44
	0.0454408	0		0	0.00231007			0.0216919				0.780282	0											0.11	0.06
	0.0462819	0		0	0.00243373			0.021871				0.780296	0.0718792											0.08	0
	0.0467766	0		0	0.00243763			0.0226029				0.783207	0											0.02	0.02
	0.0475908	0.522754		0	0.00254967			0.0228526				0.799778	0											0.14	0
	0.0479954	0		0	0.00260685			0.0231217				0.818119	0											0.11	0.03
	0.0484144	0.0452205		0	0.00286728			0.0233203				0.850865	0											0	0.12
	0.0494053	0.0627546		0	0.00293167			0.0234817				0.892588	0.00117741											0.04	0.98
	0.0506886	0		0	0.00299052			0.0247645				0.903047	0.00125086											0.5	0
	0.0515446	0.235056		0	0.00299478			0.0250168				0.904178	0											0	0.8
	0.0519224	0.406696		0	0.00305272			0.0253395				0.91318	0.00125268											0.01	0.01
	0.0526644	0		0	0.00317039			0.0256563				0.915065	0.0013111											0	0.02
	0.0527358	0.0164081		0	0.00317563			0.0256786				0.919253	0.0291198											0.02	0.02
	0.0527602	0.252854		0	0.00325818			0.0257307				0.948622	0.00135894											0.29	0.03
	0.0535607	0		0	0.0032996			0.0261759				0.975882	0.00142211											0.01	0.03
	0.0536051	0.00161745		0	0.00330543			0.0261764				1.03597	0											0.03	0.01
	0.0546574	0.14975		0	0.00337024			0.0266549				1.04102	0.0295017											0.72	0.2
	0.0558409	0.660989		0	0.00337171			0.0267565				1.08028	0.00154892											0	0.11
	0.0561207	0		0	0.00349131			0.0268435				1.08079	0.00155055											0	0.05
	0.0563758	0		0	0.00357945			0.0270444				1.08458	0.0015538											0.09	0
	0.0574071	0.00380909		0	0.00372319			0.0271757				1.10092	0.0719287											0.01	0
	0.0574697	0		0	0.00374016			0.027898				1.1172	0.00155438											0.15	0.3
	0.0580647	0.0027434		0	0.00379981			0.0287426				1.13438	0.00161693											0.23	0.02
	0.0589798	0		0	0.00380787			0.0298589				1.14073	0.00162008											0	0
	0.0593396	0		0	0.0038687			0.030578				1.14106	0.0741888											0.34	1.39
	0.0595788	0		0	0.00392258			0.0310331				1.17165	0.00179958											0	0.03
	0.0625223	0		0	0.00393002			0.0312773				1.18713	0.00199657											0	0.05
	0.0626364	0		0	0.0040272			0.0317115				1.19399	0											0	0.02
	0.0634085	0		0	0.00405275			0.0319723				1.19535	0.0296571											0.06	0.29
	0.0641093	0.133829		0	0.0041192			0.0329204				1.20929	0.00211278											0.68	0.23
	0.0667994	0.0312735		0	0.00423162			0.0336713				1.23412	0.00217196											0	0.02
	0.0671835	0.467377		0	0.00428795			0.0348924				1.23572	0.002181											0.27	0.33
	0.0674855	0		0	0.00437015			0.0353406				1.24753	0.074806											0	0.06
	0.0678577	0		0	0.00437048			0.0363225				1.27437	0.00218171											0.36	0.01
	0.0678596	0		0	0.0044921			0.0378733				1.30506	0.0021856											0	0
	0.0679817	0		0	0.00455522			0.0381633				1.3303	0.0755339											0.09
	0.0683059	0		0	0.00455765			0.0382134				1.33516	0.0022765											0.07
	0.0692387	0		0	0.00459918			0.0384014				1.34255	0.0758727											0.03
	0.0693147	0.0713539		0	0.00472504			0.0387813				1.34978	0.00235066											0.08
	0.0696702	0		0	0.00484696			0.039053				1.36307	0.00237093											0.06
	0.0700457	0		0	0.00485827			0.0393073				1.41346	0.00240979											0
	0.0703622	0.103737		0	0.00509287			0.0397504				1.42684	0											0.09
	0.0705395	0		0	0.00511877			0.0397562				1.45921	0.00241632											0.05
	0.0713745	0		0	0.00525162			0.0398468				1.514	0.0759425											0.03
	0.0716719	0.0100396		0	0.00534496			0.0401387				1.52345	0.0774883											0.31
	0.0732074	0		0	0.00536196			0.040483				1.52801	0											0.36
	0.0766591	0		0	0.00539136			0.0406813				1.5292	0.00242383											0
	0.0774703	0		0	0.00542225			0.041697				1.56705	0											0.07
	0.077951	0		0	0.00542336			0.0418492				1.62835	0.00243322											0.06
	0.0808954	0		0	0.00565218			0.0421247				1.64648	0.0777896											0.6
	0.0813571	0		0	0.00576806			0.0427849				1.66455	0											0.05
	0.0816143	0		0	0.0058525			0.0439375				1.70083	0											0.03
	0.0823379	0.262498		0	0.00587021			0.0439495				1.74732	0											0.09
	0.0824977	0		0	0.00594809			0.0443031				1.78317	0											0.2
	0.0825332	0		0	0.00623006			0.044781				1.81033	0.0024991											0.08
	0.0839639	0.219896		0	0.00634327			0.0453276				1.8704	0											0.15
	0.084057	1.60922		0	0.00649297			0.0460199				2.02668	0.0780485											0
	0.0882687	0.0441259		0	0.00649614			0.0471157				2.07971	0											0.01
	0.0894028	0.0201601		0	0.00650201			0.0475361				2.12022	0.078257											0.02
	0.0912604	0		0	0.00654177			0.0509112				2.16407	0.0026099											0
	0.0930058	0.00817963		0	0.00655406			0.0509619				2.25423	0.0789085											0.55
	0.0930139	0		0	0.00657464			0.051152				2.26856	0.0297625											0.22
	0.101703	0.0494636		0	0.00670333			0.0522449				2.28634	0.0298293											0.11
	0.105093	0.861798		0	0.00697606			0.0527731				2.35227	0.00261028											0
	0.10636	0.00589123		0	0.00699261			0.0529292				2.36754	0.0298601											0.16
	0.108049	0.0288334		0	0.00702703			0.0529769				2.43992	0.0800573											0.06
	0.108062	0.377244		0	0.00714616			0.0538723				2.45111	0.0804181											0.08
	0.108697	0.0520335		0	0.00723442			0.0540792				2.47577	0.00262716											0.01
	0.108985	0		0	0.00752024			0.0543678				2.49974	0											0.15
	0.109091	0.00866341		0	0.00761496			0.0559945				2.71741	0											0
	0.112536	6.22e-05		0	0.00769088			0.0560423				2.79128	0.0804266											0.05
	0.113407	0		0	0.00771279			0.0562452				3.02421	0.0805247											0.04
	0.115609	0		0	0.00773204			0.0570725				3.2641	0.00273458											0
	0.116914	0.0479766		0	0.00773326			0.0584406				3.26916	0.0027427											0
	0.120094	0		0	0.00779877			0.0595919				3.40001	0											0.38
	0.120566	0		0	0.0079177			0.0611843				3.47167	0.0306047											0.01
	0.121209	0		0	0.00805015			0.063138				3.51317	0											0
	0.122487	0		0	0.00823873			0.0639789				3.81603	0.030613											0.11
	0.123604	2.09982		0	0.0083563			0.0640874				4.15319	0.0805423											0.06
	0.123894	1.09831		0	0.00849703			0.0642578				4.19654	0.081686											0
	0.127791	0		0	0.00860687			0.064639				4.23256	0.0850083											0.02
	0.130055	0		0	0.00869527			0.0647011				4.36463	0.0852759											0.09
	0.131054	0		0	0.00903938			0.0671792				4.53013	0											0.11
	0.132642	0.954027		0	0.00909924			0.0693583				4.69459	0.00279479											0.04
	0.134377	0.106882		0	0.00938987			0.069525				5.78438	0.0308021											0.07
	0.136366	0		0	0.00954325			0.0709731				6.44178	0.0308286											0
	0.136416	0.112247		0	0.00986276			0.07206					0.0309771	10.3398										0.02
	0.137164	0		0	0.0103498			0.0725608					0.0858122	11.1328										0.32
	0.13801	0.0571496		0	0.0103587			0.0734732					0.00293507	14.6497										0.15
	0.138759	0		0	0.010394			0.075281					0.0872205	17.4774										0
	0.139116	0		0	0.0104707			0.0785895					0.089388											0.02
	0.140491	0.00641624		0	0.010707			0.0808674					0.08978											0.79
	0.143115	0		0	0.0107353			0.0817825					0.0897863											1.47
	0.144674	0.0349128		0	0.0107543			0.0823569					0.0905347											0.09
	0.145223	0		0	0.011148			0.0824663					0.091834											1.01
	0.145484	0		0	0.0112153			0.0841141					0.0927674											0
	0.146178	0		0	0.0112227			0.0842522					0.0943754											0.03
	0.146638	0		0	0.0112345			0.0853872					0.0946532											0.06
	0.151715	0.0407735		0	0.0114453			0.0863707					0.0947522											0.04
	0.152732	0		0	0.0116407			0.0885457					0.0947835											0.15
	0.15306	0.029005		0	0.0117621			0.0888401					0.0950195											0
	0.154791	0.10801		0	0.0118957			0.0891128					0.095226											0.08
	0.155453	0		0	0.0119034			0.0892613					0.0952579											0.37
	0.15581	0.00786557		0	0.0120097			0.0894209					0.0967516											0.51
	0.156835	0		0	0.012167			0.0901512					0.0977611											1.86
	0.15713	0		0	0.0127768			0.0905211					0.0978801											0
	0.158266	0		0	0.0129505			0.0924807					0.0993835											0.05
	0.163932	0		0	0.0131248			0.0931915					0.0999724											0.24
	0.174327	0		0	0.0131651			0.0934372					0.101305											0.03
	0.174361	0.0052579		0	0.0134845			0.0936362					0.102678											0.08
	0.175238	0		0	0.0139973			0.0944054					0.103659											0.32
	0.176692	0		0	0.0140711			0.0950691					0.105699											0.02
	0.177012	0		0	0.0142135			0.0950912					0.10662											0.1
	0.178402	0		0	0.014223			0.0952227					0.106757											0
	0.183404	0.0901385		0	0.0142947			0.0988904					0.107174											0.26
	0.183754	0		0	0.0143468			0.0988997					0.108002											0.05
	0.185926	3.49326		0	0.0143761			0.0993572					0.108664											0.2
	0.185959	0		0	0.0145406			0.0996734					0.109221											0
	0.187202	0		0	0.0147486			0.0997516					0.109928											0
	0.197501	0.105677		0	0.0148026			0.100707					0.111999											0.07
	0.197619	0		6.2e-05	0			0.103028					0.112316											0
	0.20003	0		6.21e-05	0			0.105134					0.112355											0.14
	0.201854	0.0520166		6.24e-05	0			0.106137					0.119556											0.08
	0.205508	0		0.000124363	0			0.107811					0.120062											0.28
	0.206294	0		0.000124786	0.00211459			0.111693					0.120352											0.15
	0.206416	0		0.000186808	0			0.113122					0.121627											0.3
	0.209847	0		0.000187239	0			0.114956					0.122051											0.41
	0.213385	0.0153235		0.000247792	0			0.115163					0.122873											0.06
	0.215851	0		0.000249463	0			0.118568					0.123072											0
	0.216581	0		0.00024961	0			0.120334					0.124921											0.01
	0.220411	0.272783		0.000308358	0			0.120533					0.126565											0.35
	0.220596	0.669357		0.000310536	0			0.120771					0.131653											0.03
	0.222809	0.175495		0.000310657	0			0.123711					0.136253											0.01
	0.224091	0		0.000311947	0			0.125805					0.137172											2.05
	0.224317	0		0.000435046	0			0.126858					0.139389											0.21
	0.227305	0		0.000456233	0			0.127835					0.140573											0.06
	0.228827	0.00336653		0.000496697	0			0.128291					0.141142
	0.233066	0		0.000498202	0			0.130495					0.141945
	0.233457	0		0.000559414	0			0.131283					0.142709
	0.234142	0		0.000560946	0			0.132079					0.144471
	0.243158	0		0.000561164	0			0.132456					0.145948
	0.244436	0		0.000562098	0			0.133051					0.146669
	0.251492	0		0.000685736	0			0.133705					0.146936
	0.255976	0.088994		0.000685902	0			0.13547					0.148377
	0.256212	0		0.000992849	0			0.135548					0.149945
	0.260349	0		0.00105327	0			0.137107					0.150492
	0.264057	0.00574113		0.00112038	0			0.138264					0.154174
	0.27179	0		0.00117559	0			0.143996					0.155595
	0.272775	0		0.00124918	0			0.144326					0.159567
	0.279518	0		0.00125004	0			0.145449					0.159849
	0.286746	0.306326		0.00142845	0			0.14626					0.159977
	0.287307	0		0.00155793	0			0.146505					0.163403
	0.287856	0.310979		0.0015593	0			0.148911					0.165195
	0.289671	0.0409292		0.00175005	0			0.150552					0.165696
	0.290459	0		0.00197262	0			0.150936					0.167482
	0.290511	0		0.00237151	0			0.151009					0.168312
	0.29055	0		0.00243332	0			0.151041					0.171361
	0.298173	0		0.00267473	0			0.162879					0.178127
	0.298222	0		0.00274236	0			0.167178					0.182081
	0.298443	0		0.00305475	0			0.17055					0.183237
	0.298624	0		0.0031087	0			0.170755					0.183629
	0.303926	0.0137663		0.00311828	0			0.171307					0.189276
	0.309677	0.072753		0.00318348	0			0.173175					0.189375
	0.318492	0		0.00318404	0			0.175656					0.192139
	0.322875	0.0929955		0.00323669	0			0.180548					0.194402
	0.335678	0.602153		0.00355633	0.00929265			0.186198					0.194626
	0.339651	0		0.00392656	0			0.188844					0.195465
	0.34126	0		0.00397158	0			0.188897					0.196508
	0.346156	0		0.00411016	0			0.188964					0.205391
	0.350857	0		0.00434976	0			0.192464					0.206085
	0.356976	0		0.00435559	0			0.194104					0.213541
	0.361017	0		0.00443096	0			0.195789					0.214894
	0.364371	0		0.0044953	0			0.204716					0.219187
	0.370274	0		0.0047463	0			0.211406					0.222978
	0.373178	0.00522167		0.00490642	0.00997601			0.216754					0.223207
	0.373533	0.00248948		0.00511204	0			0.216966					0.224648
	0.382764	0		0.00538994	0			0.220206					0.225632
	0.388873	0.157472		0.00541954	0			0.229091					0.230963
	0.395082	0		0.00572825	0.00792308			0.232008					0.23666
	0.406998	0.0472773		0.00577591	0.00436809			0.23621					0.239482
	0.425248	0		0.00579837	0			0.240929					0.240082
	0.425786	0.189746		0.00587874	0			0.242552					0.240789
	0.435222	0		0.0059088	0			0.242908					0.241201
	0.436539	0		0.00609556	0			0.245348					0.241546
	0.454632	0		0.00635365	0			0.265872					0.244342
	0.455141	0		0.00638828	0			0.273331					0.244855
	0.46154	0		0.00654057	0			0.302285					0.250809
	0.480369	0		0.0065973	0			0.307714					0.256095
	0.499463	0		0.00685203	0			0.309017					0.259733
	0.503585	0		0.00698037	0			0.318846					0.261221
	0.504297	0.165016		0.00703761	0.00124607			0.326703					0.268228
	0.510019	0		0.00729476	0			0.337401					0.269479
	0.520925	0		0.00746377	0			0.345021					0.269659
	0.524817	0		0.00753749	0			0.346567					0.269856
	0.539234	0		0.00822687	0			0.353865					0.273206
	0.548714	0		0.00822998	0			0.360175					0.273212
	0.551167	0		0.00858501	0			0.362398					0.274322
	0.56612	0		0.00919321	0			0.396875					0.28122
	0.58092	0		0.00973407	0			0.415655					0.28806
	0.60807	0.141893		0.00996698	0			0.429709					0.29088
	0.617614	0		0.0101311	0			0.433617					0.295104
	0.634191	0.0546639		0.0101562	0			0.441131					0.297143
	0.647237	0.000436653		0.0102262	0			0.452062					0.30049
	0.665531	0		0.0102847	0			0.514457					0.301436
	0.709896	0		0.0107081	0.000811403			0.558824					0.305115
	0.709935	0		0.0109887	0			0.613746					0.307193
	0.723826	0.000124643		0.0110483	0			0.880574					0.309363
	0.750792	0		0.0110817	0			1.13135					0.31115
	0.801711	0.00903132		0.0113929	0			1.79508					0.311741
	0.870453	0		0.0124741	0			2.91062					0.314681
	1.06783	0.000555599		0.012482	0			5.10278					0.319976
	1.07409	0		0.0127205	0.00234786			6.019					0.325411
	1.08586	0		0.0127952	0			0					0.326941
	1.52392	0		0.0131357	0			0					0.327478
	1.76946	0.0646342		0.0131507	0			0					0.330198
	1.76996	0		0.0132934	0.00351116			0					0.335032
	1.80111	0.0205221		0.0134879	0			0					0.339312
	1.82008	0.00068511		0.0137751	0			0					0.340042
	4.71934	0		0.0139127	0			0					0.344416
	6.11961	0		0.01407	0			0					0.345925
		0		0.0140894	0			0					0.353057
		0		0.0142276	0			0					0.356394
		0		0.0146723	0			0					0.356564
		0		0.0146744	0			0					0.357585
		0		0.0149894	0			0					0.364288
		0		0.0150087	0.00137791			0					0.367567
		0		0.01511	0			0					0.368468
		0		0.015178	0			0					0.370977
		0		0.0151864	0			0					0.378437
		0		0.0152826	0			0					0.391678
		0		0.0153163	0			0					0.39524
		0		0.0157224	0			0					0.402485
		0		0.0159006	0			0					0.403948
		0		0.0161332	0			0					0.404083
		0		0.0165858	0			0					0.405637
		0		0.016795	0			0					0.410842
		0		0.0168164	0			0					0.412316
		0		0.0169941	0.00911268			0					0.412558
		0		0.0171835	0			0					0.414066
		0		0.0181088	0			0					0.415212
		0		0.018315	0			0					0.422311
		0		0.0185398	0			0					0.423786
		0		0.0186729	0			0					0.43236
		0		0.0186932	0			0					0.437842
		0		0.0187721	0			0					0.438351
		0		0.0192936	0			0					0.439249
		0		0.0195672	0			0					0.443826
		0		0.0198039	0			0					0.446013
		0		0.0201158	0			0					0.452626
		0		0.0205417	0			0					0.461396
		0		0.0211117	0			0					0.461587
		0		0.0211882	0			0					0.463382
		0		0.0214391	0			0					0.464869
		0		0.0214482	0			0					0.470046
		0		0.0216494	0			0					0.470303
		0		0.0217681	0			0					0.470326
		0		0.0218872	0			0					0.47105
		0		0.022122	0			0					0.471924
		0		0.0222863	0			0					0.472397
		0		0.0224226	0			0					0.475114
		0		0.0224302	0			0					0.481774
		0		0.0227378	0			0					0.490848
		0		0.0227434	0			0					0.50249
		0		0.0230415	0			0					0.503775
		0		0.0237962	0			0					0.50479
		0		0.0244191	0			0					0.507449
		0		0.0246523	0			0					0.50853
		0		0.0248616	0			0					0.513378
		0		0.0258602	0			0					0.539637
		0		0.0258792	0			0					0.543734
		0		0.0261843	0.00018738			0					0.547474
		0		0.0263814	0			0					0.551799
		0		0.0265506	0			0					0.563945
		0		0.0268079	0			0					0.56614
		0		0.0270494	0			0					0.570224
		0		0.027073	0			0					0.576887
		0		0.0279881	0			0					0.591749
		0		0.0282645	0			0					0.591849
		0		0.0282979	0			0					0.603855
		0		0.0283113	0			0					0.606476
		0		0.0290549	0			0					0.607408
		0		0.029374	0.0113596			0					0.610571
		0		0.0296265	0			0					0.617256
		0		0.0297066	0			0					0.618677
		0		0.0300958	0.00118098			0					0.619089
		0		0.0309794	0			0					0.633136
		0		0.0322665	0			0					0.634889
		0		0.0327151	0			0					0.637776
		0		0.0335172	0			0					0.645959
		0		0.0344906	0			0					0.653681
		0		0.0344955	0			0					0.664444
		0		0.0356619	0			0					0.692526
		0		0.0359051	0			0					0.706006
		0		0.0361213	0			0					0.707214
		0		0.0362114	0			0					0.71234
		0		0.0363762	0			0					0.712906
		0		0.037134	0			0					0.731644
		0		0.0372181	0			0					0.737233
		0		0.0391204	0			0					0.743802
		0		0.0396617	0			0					0.747582
		0		0.0397997	0			0					0.747712
		0		0.0401304	0			0					0.750493
		0		0.0421349	0			0					0.765011
		0		0.0425262	0			0					0.765214
		0		0.0426127	0			0					0.779873
		0		0.0428428	0			0					0.787423
		0		0.0430797	0			0					0.788097
		0		0.0434239	0			0					0.805156
		0		0.0434432	0			0					0.808627
		0		0.0439226	0			0					0.811704
		0		0.0439993	0			0					0.846247
		0		0.0452448	0			0					0.850099
		0		0.046672	0			0					0.857799
		0		0.0475885	0			0					0.875932
		0		0.0475899	0			0					0.887245
		0		0.0479661	0			0					0.90173
		0		0.0481974	0			0					0.926557
		0		0.0482174	0			0					0.935247
		0		0.049237	0			0					0.935829
		0		0.0495234	0			0					0.938013
		0		0.051561	0			0					0.938976
		0		0.0517216	0			0					0.94083
		0		0.0524775	0			0					0.962979
		0		0.052714	0			0					0.989303
		0		0.0535954	0			0					1.03346
		0		0.0537274	0.0110285			0					1.03518
		0		0.0555613	0			0					1.05051
		0		0.0558559	0			0					1.053
		0		0.056534	0			0					1.07842
		0		0.0565437	0			0					1.11043
		0		0.0568689	0			0					1.12696
		0		0.0575295	0			0					1.14349
		0		0.0577029	0			0					1.16375
		0		0.0584439	0			0					1.19753
		0		0.0596784	0			0					1.21765
		0		0.0602246	0			0					1.23313
		0		0.0612123	0			0					1.24651
		0		0.0615524	0			0					1.25781
		0		0.0624873	0			0					1.28146
		0		0.0643868	0			0					1.29936
		0		0.0657684	0			0					1.31031
		0		0.0676393	0			0					1.37526
		0		0.067962	0			0					1.38296
		0		0.068379	0			0					1.42179
		0		0.068662	0			0					1.45871
		0		0.0691233	0			0					1.49936
		0		0.0700002	0			0					1.52737
		0		0.0704288	0			0					1.59413
		0		0.0704397	0			0					1.64544
		0		0.0710711	0			0					1.67287
		0		0.0742517	0			0					1.72994
		0		0.0746197	0			0					1.74847
		0		0.0752518	0			0					1.75737
		0		0.0753752	0			0					1.85197
		0		0.0755737	0			0					2.02853
		0		0.0779092	0			0					2.08133
		0		0.0783871	0			0					2.20186
		0		0.078458	0			0					2.20272
		0		0.0790114	0			0					2.52196
		0		0.0814365	0			0					2.57645
		0		0.0819662	0			0					2.58574
		0		0.0819767	0			0					2.721
		0		0.0851604	0			0					2.95491
		0		0.0859544	0			0					3.3359
		0		0.0865162	0			0					3.37325
		0		0.0873199	0			0					4.37756
		0		0.0873938	0			0					4.8029
		0		0.0893299	0			0					5.04475
		0		0.0901095	0			0					5.81422
		0		0.0916295	0.00112342			0					7.33174
		0		0.0926107	0.00729967			0
		0		0.0985611	0			0
		0		0.0986687	0			0
		0		0.100075	0			0
		0		0.102547	0			0
		0		0.103414	0			0
		0		0.103935	0			0
		0		0.105956	0.00517462			0
		0		0.10837	0			0
		0		0.110238	0			0
		0		0.110726	0			0
		0		0.112211	0			0
		0		0.112847	0			0
		0		0.113209	0			0
		0		0.116227	0			0
		0		0.117444	0			0
		0		0.11761	0			0
		0		0.117633	0			0
		0		0.122331	0			0
		0		0.122948	0			0
		0		0.125574	0			0
		0		0.127403	0			0
		0		0.129303	0			0
		0		0.129686	0			0
		0		0.131823	0			0
		0		0.132592	0			0
		0		0.140922	0			0
		0		0.14304	0			0
		0		0.146463	0			0
		0		0.147213	0			0
		0		0.148532	0			0
		0		0.151444	0			0
		0		0.152197	0			0
		0		0.152965	0			0
		6.18e-05		0.153101	0			0
		0.000123998		0.157005	0			0
		0.000124697		0.158642	0			0
		0.000186609		0.16502	0			0
		0.000186872		0.165702	0			0
		0.000187058		0.165914	0			0
		0.000187201		0.166631	0			0
		0.000434155		0.168214	0			0
		0.000498325		0.170516	0			0
		0.000499834		0.172886	0			0
		0.000557719		0.17452	0			0
		0.000559056		0.174727	0			0
		0.000687035		0.177172	0			0
		0.000807827		0.191558	0			0
		0.000870961		0.194786	0			0
		0.000934223		0.196556	0			0
		0.00143544		0.197471	0			0
		0.00149505		0.201091	0			0
		0.00224605		0.202334	0			0
		0.00242593		0.206264	0			0
		0.00251039		0.208735	0			0
		0.00254988		0.209673	0			0
		0.00255422		0.21147	0			0
		0.00274233		0.212119	0			0
		0.00299159		0.212988	0			0
		0.00318438		0.213532	0			0
		0.00333118		0.214027	0			0
		0.00336369		0.218089	0			0
		0.00405667		0.224677	0			0
		0.00423608		0.23121	0			0
		0.00442971		0.233828	0			0
		0.00725022		0.235144	0.00322928			0
		0.0123486		0.237814	0			0
		0.0132984		0.240229	0			0
		0.0136088		0.242294	0.00161869			0
		0.0137593		0.253758	0.0135263			0
		0.0147194		0.255287	0			0
		0.0149106		0.261327	0			0
		0.0184675		0.26646	0			0
		0.0192042		0.267512	0			0
		0.0198631		0.269731	0			0
		0.0200259		0.271864	0			6.24e-05
		0.0201488		0.274092	0.000808486			0.000124299
		0.0203415		0.277206	0			0.000248882
		0.0212675		0.284905	0			0.000373744
		0.0213036		0.289215	0			0.000498787
		0.0234329		0.293625	0			0.000625515
		0.0248668		0.30007	0			0.000687992
		0.0253359		0.308305	0			0.00080669
		0.0255556		0.308893	0			0.00105327
		0.028721		0.313554	0			0.00142501
		0.0320443		0.317922	0			0.00154337
		0.0339278		0.320506	0			0.00166943
		0.034135		0.32731	0			0.00211886
		0.0345642		0.332678	0			0.00243665
		0.0345992		0.340939	0			0.00249827
		0.0351614		0.34329	0.00355386			0.00254813
		0.0376803		0.35263	0			0.00255269
		0.0425965		0.355621	0			0.00305239
		0.0433644		0.363565	0			0.0031832
		0.0493666		0.363955	0			0.00321973
		0.0508226		0.378437	0			0.00322676
		0.0523476		0.389054	0			0.00324638
		0.0529803		0.390335	0			0.00397689
		0.056684		0.390934	0			0.00399453
		0.0630116		0.394308	0			0.00415191
		0.065249		0.394419	0			0.00498612
		0.0699998		0.404285	0			0.00501871
		0.0726423		0.409604	0			0.00567528
		0.0761398		0.409855	0			0.00634384
		0.0789374		0.424883	0			0.00679684
		0.0797833		0.426991	0			0.00698508
		0.0992656		0.427749	0			0.00704256
		0.103812		0.434363	0			0.00767401
		0.105899		0.444339	0			0.00782542
		0.107866		0.450642	0			0.00810695
		0.120975		0.456205	0			0.0085808
		0.121192		0.457274	0			0.00873465
		0.123397		0.463609	0			0.0089163
		0.134231		0.46438	0			0.00934651
		0.13918		0.476724	0			0.00942944
		0.151329		0.494073	0			0.0105899
		0.169149		0.523253	0			0.0107545
		0.173041		0.523448	0			0.0112399
		0.176978		0.526665	0			0.0112522
		0.17876		0.548317	0			0.0117887
		0.186382		0.553267	0			0.0126919
		0.188948		0.553951	0			0.0128932
		0.19594		0.573837	0			0.0129667
		0.231514		0.581233	0			0.0131559
		0.233234		0.585211	0			0.0138898
		0.23463		0.591324	0			0.0145574
		0.235278		0.637311	0			0.0148252
		0.253266		0.63855	0			0.0151761
		0.288096		0.638766	0			0.0160323
		0.303406		0.641841	0			0.0163928
		0.372471		0.641882	0			0.0186728
		0.423549		0.646197	0			0.0187171
		0.434042		0.648994	0			0.018744
		0.43922		0.649678	0			0.019885
		0.447706		0.658275	0			0.0199631
		0.527845		0.701034	0			0.021354
		0.576855		0.756707	0			0.0214025
		0.677493		0.808427	0.00130822			0.0215354
		0.755376		0.836335	0			0.0220654
		0.918836		0.83863	0			0.0222383
		1.06246		0.865319	0			0.0222463
		1.14431		0.877955	0			0.022997
		1.4116		0.883022	0			0.0248656
		2.56066		0.921801	0			0.0249163
		2.71493		0.956759	0			0.0250306
				1.14372	0			0.0264699
				1.16952	0			0.026502
				1.18616	0			0.0272278
				1.22783	0			0.0272346
				1.25798	0			0.0286034
				1.31536	0			0.029324
				1.32529	0			0.0294605
				1.3366	0			0.0346638
				1.3384	0.000748325			0.0368626
				1.37249	0			0.037439
				1.39144	0			0.0381651
				1.52362	0			0.0382347
				1.56363	0			0.0387114
				1.65675	0			0.0400184
				1.74984	0			0.0408013
				1.75557	0			0.0425942
				1.83861	0			0.0430996
				1.85164	0			0.0434008
				1.93771	0			0.0446264
				2.08418	0			0.0468518
				3.18245	0			0.0508767
				4.33368	0			0.0520187
				4.38935	0			0.0535095
				5.63469	0			0.053606
				5.85165	0			0.0560123
					0.0148156			0.0570824
					0.000124513			0.0636239
					0.015021			0.0637118
					0.0155021			0.0654577
					0.0155267			0.0661881
					0.0156302			0.0714421
					0.0157319			0.0721285
					0.0157848			0.073336
					0.0158201			0.0738108
					0.0159094			0.0738699
					0.0161336			0.0775094
					0.0161854			0.0784862
					0.0163058			0.0814135
					0.0166225			0.0814673
					0.0167917			0.0839526
					0.0168791			0.0912147
					0.016921			0.0920641
					0.0169618			0.0934793
					0.0169899			0.0997903
					0.0173397			0.0997945
					0.0176914			0.102059
					0.017789			0.107764
					0.01833			0.112384
					0.0184736			0.115653
					0.0192686			0.116978
					0.019515			0.12954
					0.0196397			0.130205
					0.0197041			0.130994
					0.0197641			0.143162
					0.019977			0.15005
					0.0203096			0.158903
					0.0204941			0.165935
					0.020638			0.172346
					0.0207991			0.187158
					0.0208858			0.189558
					0.0210255			0.193145
					0.021256			0.206445
					0.02133			0.207499
					0.0214083			0.207932
					0.0214273			0.216675
					0.0217091			0.22032
					0.0217904			0.221191
					0.0219302			0.223296
					0.0219935			0.224375
					0.0220969			0.23385
					0.02211			0.236523
					0.0222041			0.244986
					0.0224837			0.246188
					0.0225225			0.247668
					0.0225558			0.268611
					0.0225607			0.294859
					0.0226872			0.306643
					0.0229154			0.314969
					0.0229606			0.34842
					0.0230417			0.357905
					0.0230847			0.358661
					0.0231624			0.369507
					0.0233898			0.422092
					0.0236081			0.446903
					0.0236181			0.453229
					0.0238756			0.460861
					0.0243568			0.487614
					0.0244252			0.490669
					0.0246132			0.507096
					0.0248598			0.51181
					0.0249941			0.5535
					0.0250197			0.560688
					0.0250506			0.562593
					0.0250552			0.640527
					0.0251165			0.650188
					0.0251213			0.721163
					0.0251837			0.78103
					0.0254347			2.43761
					0.0255321
					0.025634
					0.0257811
					0.0257853
					0.025847
					0.0261446
					0.0262105
					0.0267188
					0.0267574
					0.0272415
					0.0279299
					0.0281456
					0.0281532
					0.0289148
					0.0289507
					0.0292957
					0.0293001
					0.0301519
					0.0301646
					0.0303223
					0.0308531
					0.0310451
					0.0313827
					0.0314515
					0.0314977
					0.0315967
					0.0315986
					0.0317182
					0.0317339
					0.0318539
					0.0327416
					0.0328288
					0.0328374
					0.0337066
					0.034492
					0.0345636
					0.0355742
					0.0355817
					0.0356642
					0.0357843
					0.0363633
					0.0365181
					0.0365646
					0.0365671
					0.0366286
					0.0367115
					0.0368493
					0.0370308
					0.0374275
					0.0380488
					0.0392781
					0.0398093
					0.0401101
					0.0401934
					0.0401995
					0.0402177
					0.0405672
					0.0406093
					0.0406706
					0.0407273
					0.0407868
					0.0408176
					0.0408798
					0.0410676
					0.0415486
					0.0416114
					0.0422177
					0.0427385
					0.0428173
					0.0435271
					0.0435742
					0.0439119
					0.0445053
					0.0446854
					0.0447484
					0.0449597
					0.0452964
					0.0454269
					0.0458323
					0.0459206
					0.0459736
					0.0462034
					0.0463568
					0.0465053
					0.0468982
					0.0469683
					0.0471663
					0.0471855
					0.0472583
					0.0474892
					0.0479998
					0.0487808
					0.0487915
					0.0491559
					0.0494867
					0.0495105
					0.0507542
					0.0509004
					0.0519941
					0.052068
					0.0523697
					0.0525209
					0.0525577
					0.0525666
					0.0527408
					0.0527573
					0.0529997
					0.0531118
					0.0532032
					0.0535382
					0.0540204
					0.0540275
					0.0542096
					0.0542691
					0.0545176
					0.0545299
					0.0551552
					0.0551911
					0.0555014
					0.055592
					0.0558605
					0.0559336
					0.0559499
					0.0565562
					0.0576419
					0.0577118
					0.057746
					0.0578301
					0.0579679
					0.0581802
					0.0584538
					0.0586633
					0.0588659
					0.0590903
					0.0596149
					0.0600482
					0.060281
					0.0604021
					0.060643
					0.0612162
					0.0612991
					0.0615169
					0.0617133
					0.0617194
					0.0617772
					0.0624107
					0.0633036
					0.0635074
					0.0636419
					0.0640226
					0.0640838
					0.0642288
					0.0642496
					0.0644334
					0.0645464
					0.0648302
					0.0649211
					0.0666305
					0.0667799
					0.0672936
					0.0674944
					0.0676894
					0.0680066
					0.0683339
					0.0684651
					0.068814
					0.0693563
					0.0696504
					0.0700922
					0.0707165
					0.0714147
					0.0725619
					0.0728391
					0.0729958
					0.0731273
					0.0733685
					0.0734349
					0.0735913
					0.0737662
					0.0739341
					0.0741122
					0.0744455
					0.0752301
					0.0758974
					0.0759323
					0.0776996
					0.0793713
					0.0794332
					0.0796884
					0.0804156
					0.0808391
					0.0811377
					0.082863
					0.0833451
					0.0843989
					0.0851047
					0.0857273
					0.0861246
					0.0865821
					0.0868822
					0.0869641
					0.0870241
					0.0876278
					0.0876576
[truncated: 395 more rows]
