# Supplementary material for: A retrotransposon-derived DNA zip code internalizes myeloma cells through Clathrin-Rab5a-mediated endocytosis
Source: Frontiers journal article supplement (doi:10.3389/fonc.2024.1288724), 2024-02-23
Supplement: Data_Sheet_1.ZIP [file Data_Sheet_1.ZIP]

All Events - 2. Trypsin Cells+SEQ2 Cy52

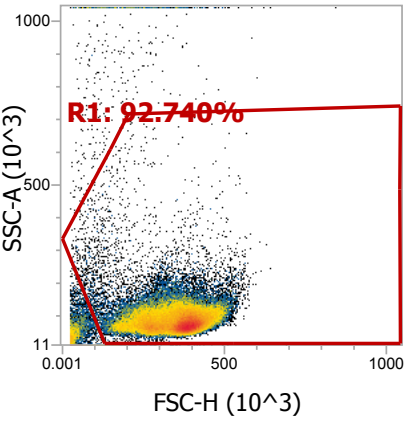

R1 - 2. Trypsin Cells+SEQ2 Cy52

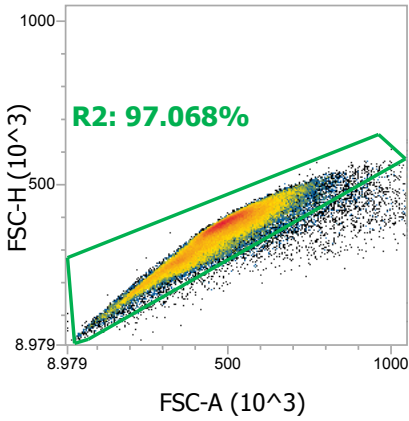

R2 - 2. Trypsin Cells+SEQ2 Cy52

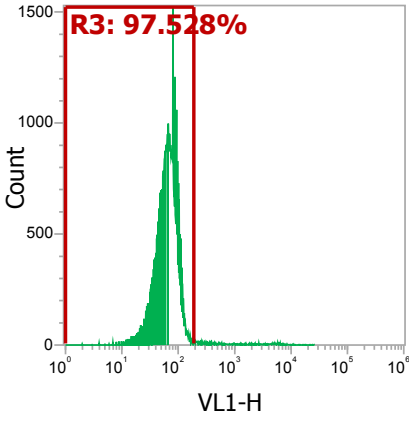

R3 - 2. Trypsin Cells+SEQ2 Cy52

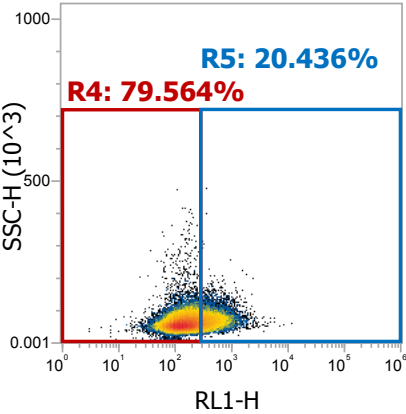

Experiment: **20210901**  
Sample: **2. Trypsin Cells+SEQ2 Cy52**  
Time Recorded: **12:26:22**

| Name         | Gate       | X Parameter | Y Parameter | Count  | %Total  | %Gated  |
|--------------|------------|-------------|-------------|--------|---------|---------|
| △ All Events | All Events | N/A         | N/A         | 63,400 | 100.000 | 100.000 |
| △ R1         | R1         | FSC - FSC-H | SSC - SSC-A | 58,797 | 92.740  | 92.740  |
| △ R2         | R2         | FSC - FSC-A | FSC - FSC-H | 57,073 | 90.021  | 97.068  |
| △ R3         | R3         | VL1 - VL1-H |             | 55,662 | 87.795  | 97.528  |
| R4           | R4         | RL1 - RL1-H | SSC - SSC-H | 44,287 | 69.853  | 79.564  |
| R5           | R5         | RL1 - RL1-H | SSC - SSC-H | 11,375 | 17.942  | 20.436  |

All Events - 3. Trypsin Cells+SEQ2 Cy52

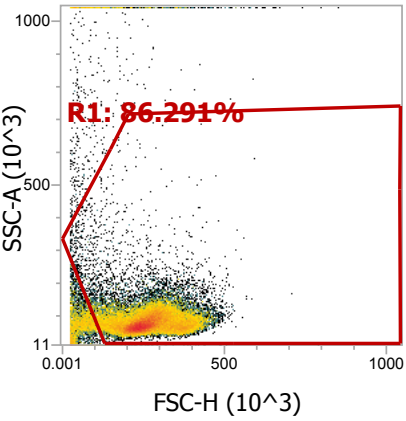

All Events - 3. Trypsin Cells+SEQ2 Cy52

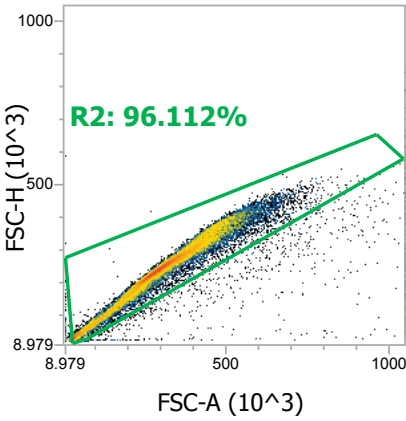

R2 - 3. Trypsin Cells+SEQ2 Cy52

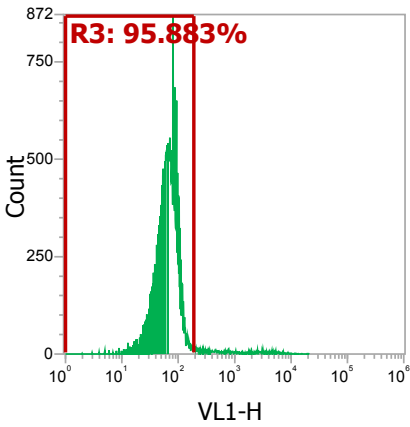

R3 - 3. Trypsin Cells+SEQ2 Cy52

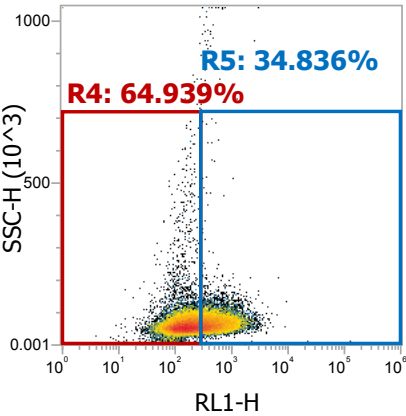

Experiment: **20210903**  
Sample: **3. Trypsin Cells+SEQ2 Cy52**  
Time Recorded: **14:16:36**

| Name         | Gate       | X Parameter | Y Parameter | Count  | %Total  | %Gated  |
|--------------|------------|-------------|-------------|--------|---------|---------|
| △ All Events | All Events | N/A         | N/A         | 34,750 | 100.000 | 100.000 |
| ■ R1         | R1         | FSC - FSC-H | SSC - SSC-A | 29,986 | 86.291  | 86.291  |
| △ ■ R2       | R2         | FSC - FSC-A | FSC - FSC-H | 33,399 | 96.112  | 96.112  |
| △ ■ R3       | R3         | VL1 - VL1-H |             | 32,024 | 92.155  | 95.883  |
| ■ R4         | R4         | RL1 - RL1-H | SSC - SSC-H | 20,796 | 59.845  | 64.939  |
| ■ R5         | R5         | RL1 - RL1-H | SSC - SSC-H | 11,156 | 32.104  | 34.836  |

All Events - 4. Trypsin Cells+SEQ2 Cy5

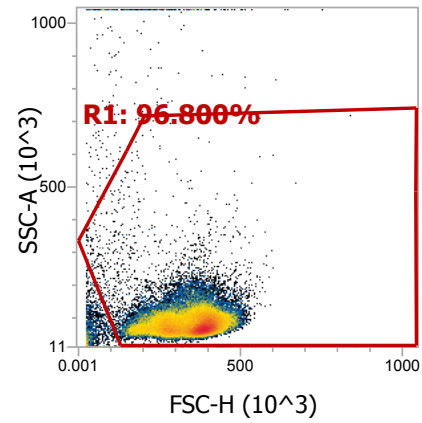

R1 - 4. Trypsin Cells+SEQ2 Cy5

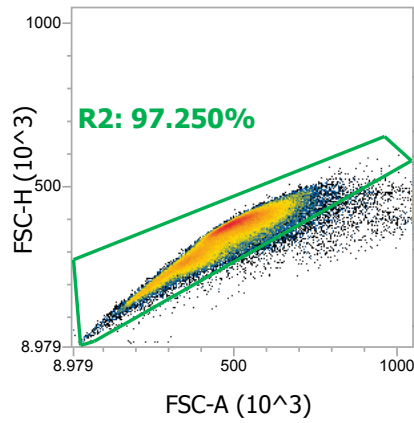

R2 - 4. Trypsin Cells+SEQ2 Cy5

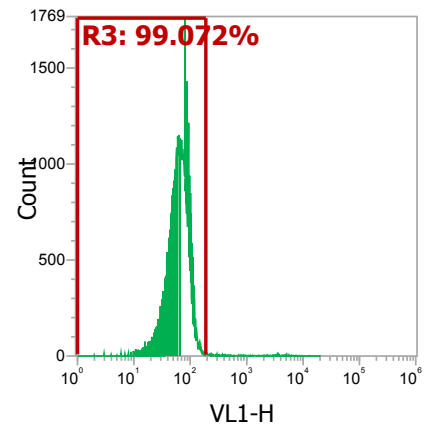

R3 - 4. Trypsin Cells+SEQ2 Cy5

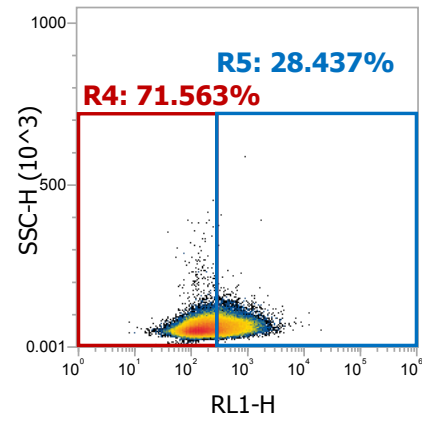

Experiment: **20210908**  
Sample: **4. Trypsin Cells+SEQ2 Cy5**  
Time Recorded: **13:42:33**

| Name         | Gate       | X Parameter | Y Parameter | Count  | %Total  | %Gated  |
|--------------|------------|-------------|-------------|--------|---------|---------|
| △ All Events | All Events | N/A         | N/A         | 71,181 | 100.000 | 100.000 |
| △ R1         | R1         | FSC - FSC-H | SSC - SSC-A | 68,903 | 96.800  | 96.800  |
| △ R2         | R2         | FSC - FSC-A | FSC - FSC-H | 67,008 | 94.137  | 97.250  |
| △ R3         | R3         | VL1 - VL1-H |             | 66,386 | 93.264  | 99.072  |
| R4           | R4         | RL1 - RL1-H | SSC - SSC-H | 47,508 | 66.743  | 71.563  |
| R5           | R5         | RL1 - RL1-H | SSC - SSC-H | 18,878 | 26.521  | 28.437  |

All Events - 5. Trypsin Cells+SEQ2 Cy5

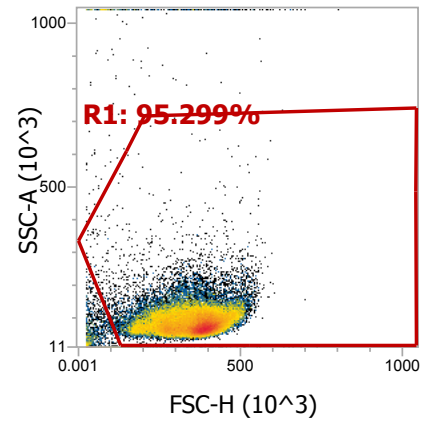

R1 - 5. Trypsin Cells+SEQ2 Cy5

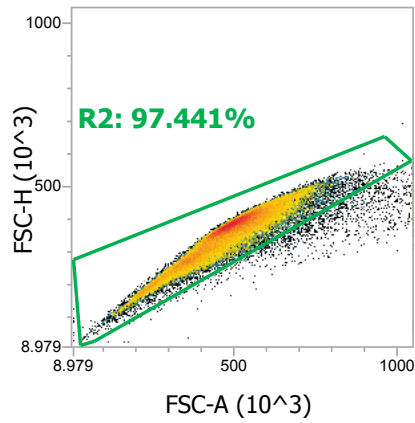

R2 - 5. Trypsin Cells+SEQ2 Cy5

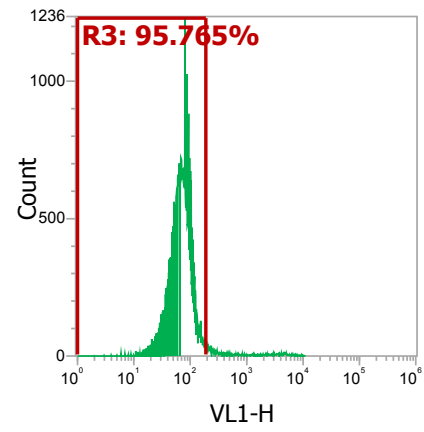

R3 - 5. Trypsin Cells+SEQ2 Cy5

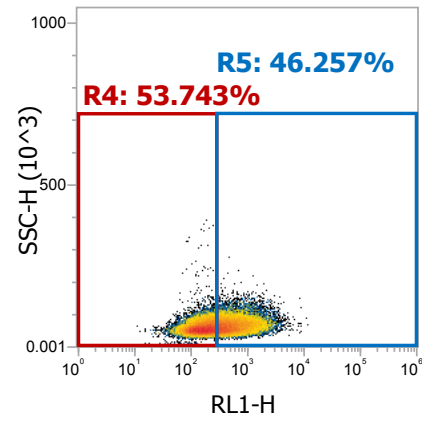

Experiment: **20210917**  
Sample: **5. Trypsin Cells+SEQ2 Cy5**  
Time Recorded: **11:23:08**

| Name         | Gate       | X Parameter | Y Parameter | Count  | %Total  | %Gated  |
|--------------|------------|-------------|-------------|--------|---------|---------|
| △ All Events | All Events | N/A         | N/A         | 49,206 | 100.000 | 100.000 |
| △ R1         | R1         | FSC - FSC-H | SSC - SSC-A | 46,893 | 95.299  | 95.299  |
| △ R2         | R2         | FSC - FSC-A | FSC - FSC-H | 45,693 | 92.861  | 97.441  |
| △ R3         | R3         | VL1 - VL1-H |             | 43,758 | 88.928  | 95.765  |
| R4           | R4         | RL1 - RL1-H | SSC - SSC-H | 23,517 | 47.793  | 53.743  |
| R5           | R5         | RL1 - RL1-H | SSC - SSC-H | 20,241 | 41.135  | 46.257  |

All Events - 6. Trypsin Cells+SEQ2 Cy5

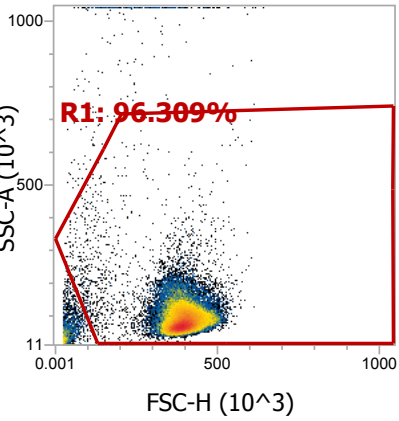

R1 - 6. Trypsin Cells+SEQ2 Cy5

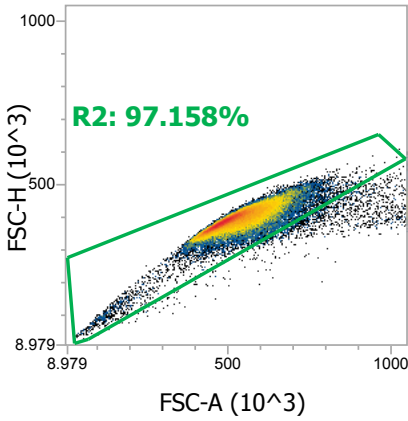

R2 - 6. Trypsin Cells+SEQ2 Cy5

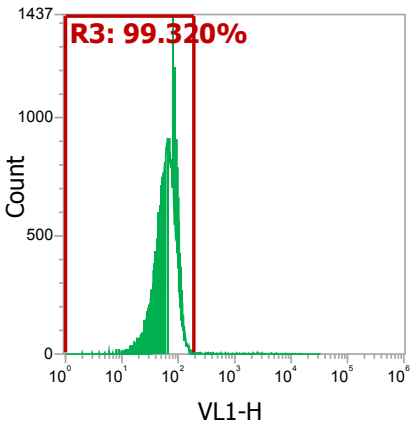

R3 - 6. Trypsin Cells+SEQ2 Cy5

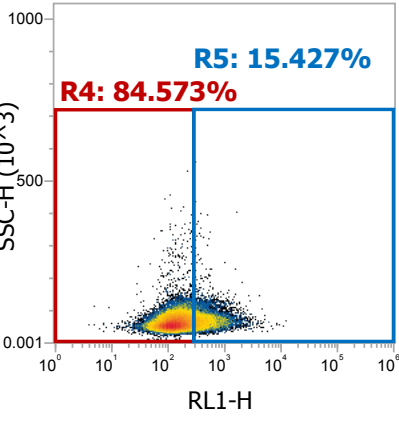

Experiment: **20210924**  
Sample: **6. Trypsin Cells+SEQ2 Cy5**  
Time Recorded: **13:40:16**

| Name         | Gate       | X Parameter | Y Parameter | Count  | %Total  | %Gated  |
|--------------|------------|-------------|-------------|--------|---------|---------|
| △ All Events | All Events | N/A         | N/A         | 55,673 | 100.000 | 100.000 |
| △ R1         | R1         | FSC - FSC-H | SSC - SSC-A | 53,618 | 96.309  | 96.309  |
| △ R2         | R2         | FSC - FSC-A | FSC - FSC-H | 52,094 | 93.571  | 97.158  |
| △ R3         | R3         | VL1 - VL1-H |             | 51,740 | 92.936  | 99.320  |
| R4           | R4         | RL1 - RL1-H | SSC - SSC-H | 43,758 | 78.598  | 84.573  |
| R5           | R5         | RL1 - RL1-H | SSC - SSC-H | 7,982  | 14.337  | 15.427  |
