# Supplementary material for: A retrotransposon-derived DNA zip code internalizes myeloma cells through Clathrin-Rab5a-mediated endocytosis
Source: Frontiers journal article supplement (doi:10.3389/fonc.2024.1288724), 2024-02-23
Supplement: Data_Sheet_1.ZIP [file Data_Sheet_1.ZIP]

All Events - 1. Trypsin Cells Only

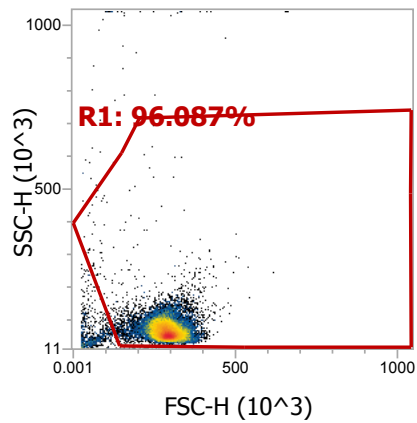

All Events - 1. Trypsin Cells Only

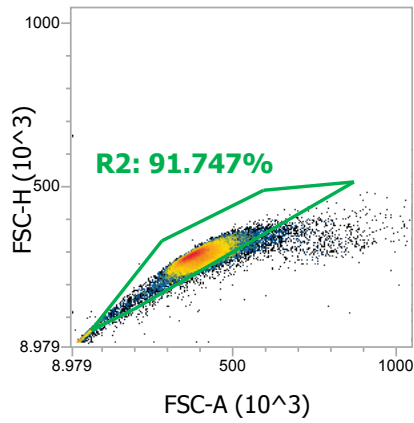

R2 - 1. Trypsin Cells Only

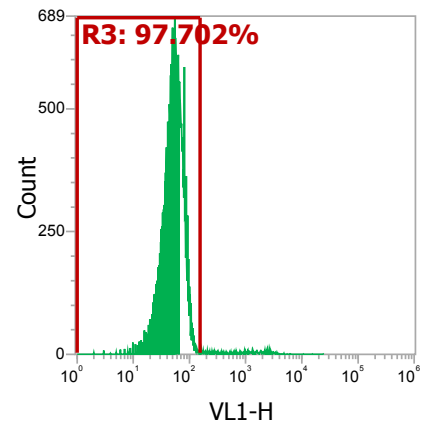

R3 - 1. Trypsin Cells Only

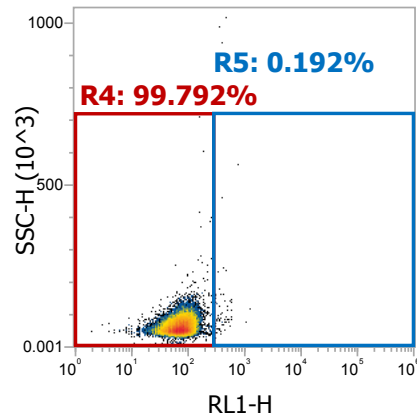

Experiment: **20220511**  
Sample: **1. Trypsin Cells Only**  
Time Recorded: **14:44:16**

| Name       | Gate       | X Parameter | Y Parameter | Count  | %Total  | %Gated  |
|------------|------------|-------------|-------------|--------|---------|---------|
| All Events | All Events | N/A         | N/A         | 34,907 | 100.000 | 100.000 |
| R1         | R1         | FSC - FSC-H | SSC - SSC-H | 33,541 | 96.087  | 96.087  |
| R2         | R2         | FSC - FSC-A | FSC - FSC-H | 32,026 | 91.747  | 91.747  |
| R3         | R3         | VL1 - VL1-H |             | 31,290 | 89.638  | 97.702  |
| R4         | R4         | RL1 - RL1-H | SSC - SSC-H | 31,225 | 89.452  | 99.792  |
| R5         | R5         | RL1 - RL1-H | SSC - SSC-H | 60     | 0.172   | 0.192   |

All Events - 2. Trypsin Cells+ 10ng per...

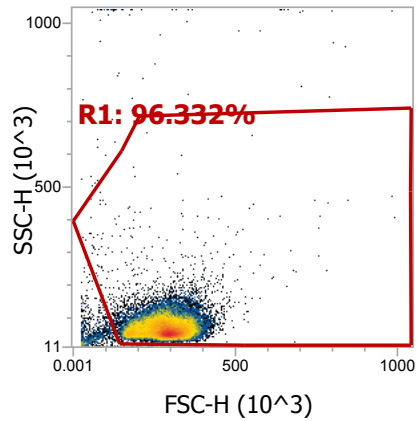

All Events - 2. Trypsin Cells+ 10ng per...

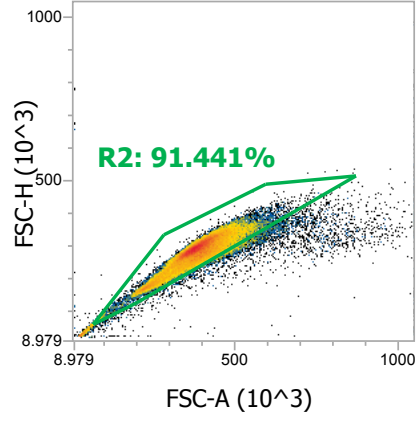

R2 - 2. Trypsin Cells+ 10ng per mL SEQ...

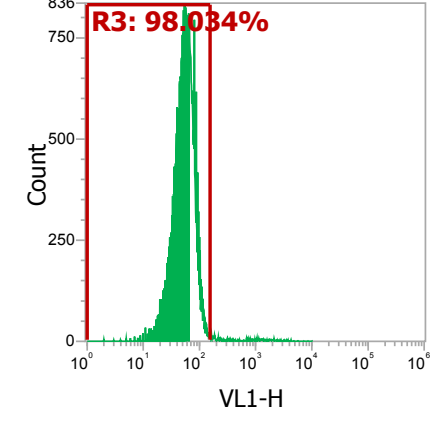

R3 - 2. Trypsin Cells+ 10ng per mL SEQ...

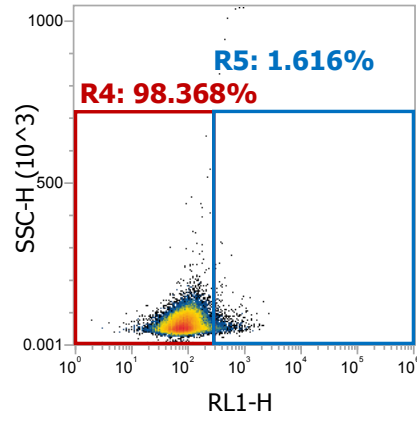

Experiment: **20220511**  
Sample: **2. Trypsin Cells+ 10ng per mL SEQ2 Cy5**  
Time Recorded: **14:45:45**

| Name       | Gate       | X Parameter | Y Parameter | Count  | %Total  | %Gated  |
|------------|------------|-------------|-------------|--------|---------|---------|
| All Events | All Events | N/A         | N/A         | 46,946 | 100.000 | 100.000 |
| R1         | R1         | FSC - FSC-H | SSC - SSC-H | 45,224 | 96.332  | 96.332  |
| R2         | R2         | FSC - FSC-A | FSC - FSC-H | 42,928 | 91.441  | 91.441  |
| R3         | R3         | VL1 - VL1-H |             | 42,084 | 89.643  | 98.034  |
| R4         | R4         | RL1 - RL1-H | SSC - SSC-H | 41,397 | 88.180  | 98.368  |
| R5         | R5         | RL1 - RL1-H | SSC - SSC-H | 680    | 1.448   | 1.616   |

All Events - 3. Trypsin Cells+ 30ng per...

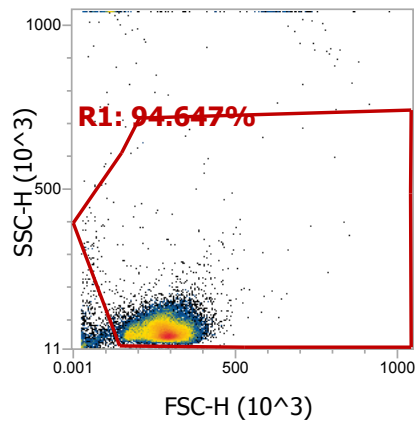

All Events - 3. Trypsin Cells+ 30ng per...

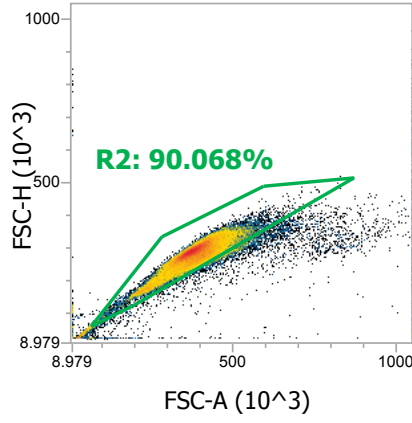

R2 - 3. Trypsin Cells+ 30ng per mL SEQ...

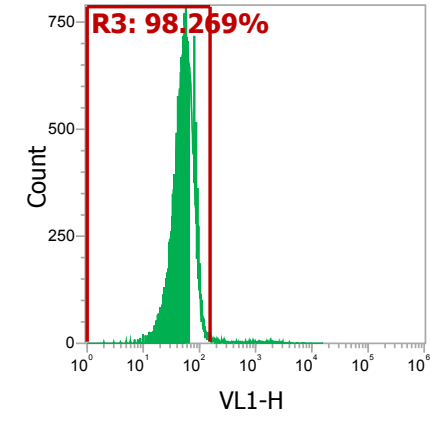

R3 - 3. Trypsin Cells+ 30ng per mL SEQ...

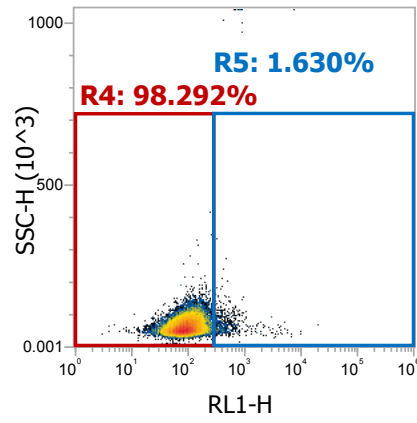

Experiment: **20220511**  
Sample: **3. Trypsin Cells+ 30ng per mL SEQ2 Cy5**  
Time Recorded: **14:47:14**

| Name         | Gate       | X Parameter | Y Parameter | Count  | %Total  | %Gated  |
|--------------|------------|-------------|-------------|--------|---------|---------|
| ▢ All Events | All Events | N/A         | N/A         | 42,409 | 100.000 | 100.000 |
| ▢ R1         | R1         | FSC - FSC-H | SSC - SSC-H | 40,139 | 94.647  | 94.647  |
| ▢ R2         | R2         | FSC - FSC-A | FSC - FSC-H | 38,197 | 90.068  | 90.068  |
| ▢ R3         | R3         | VL1 - VL1-H |             | 37,536 | 88.510  | 98.269  |
| ▢ R4         | R4         | RL1 - RL1-H | SSC - SSC-H | 36,895 | 86.998  | 98.292  |
| ▢ R5         | R5         | RL1 - RL1-H | SSC - SSC-H | 612    | 1.443   | 1.630   |

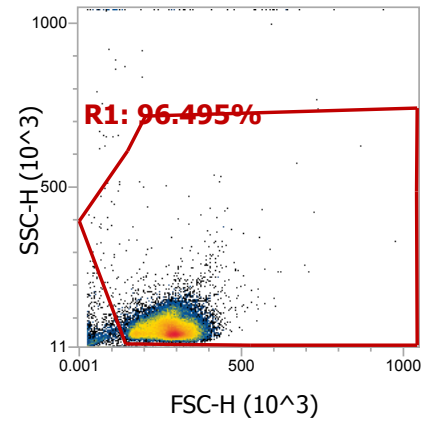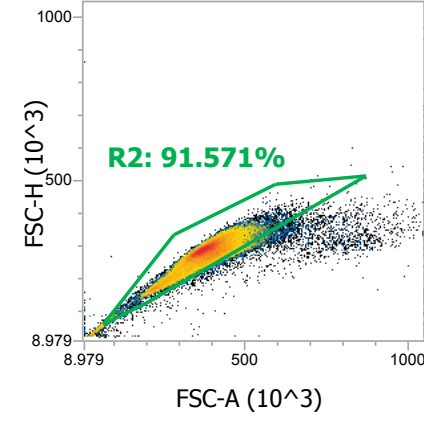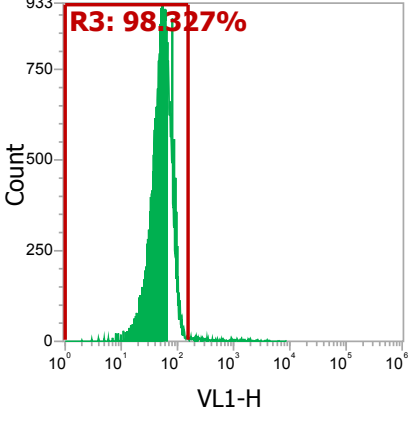

R3 - 4. Trypsin Cells+ 100ng per mL SE...

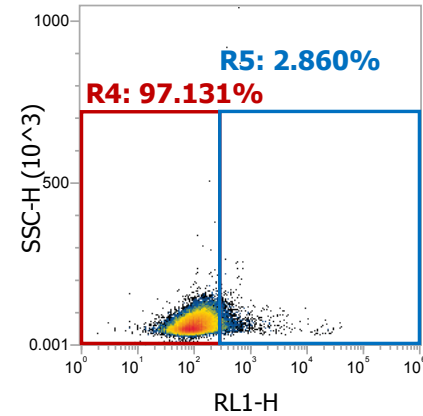

Experiment: **20220511**  
Sample: **4. Trypsin Cells+ 100ng per mL SEQ2 Cy5**  
Time Recorded: **14:48:42**

| Name       | Gate       | X Parameter | Y Parameter | Count  | %Total  | %Gated  |
|------------|------------|-------------|-------------|--------|---------|---------|
| All Events | All Events | N/A         | N/A         | 49,933 | 100.000 | 100.000 |
| R1         | R1         | FSC - FSC-H | SSC - SSC-H | 48,183 | 96.495  | 96.495  |
| R2         | R2         | FSC - FSC-A | FSC - FSC-H | 45,724 | 91.571  | 91.571  |
| R3         | R3         | VL1 - VL1-H |             | 44,959 | 90.039  | 98.327  |
| R4         | R4         | RL1 - RL1-H | SSC - SSC-H | 43,669 | 87.455  | 97.131  |
| R5         | R5         | RL1 - RL1-H | SSC - SSC-H | 1,286  | 2.575   | 2.860   |

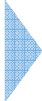

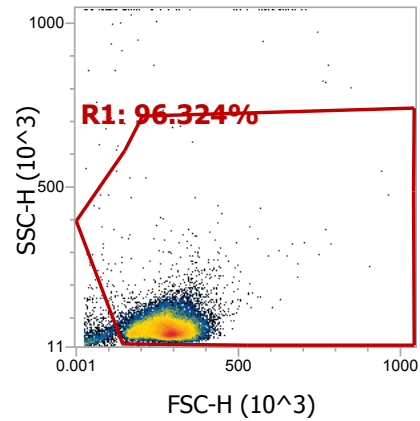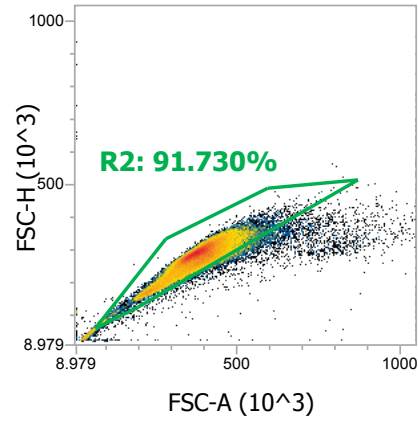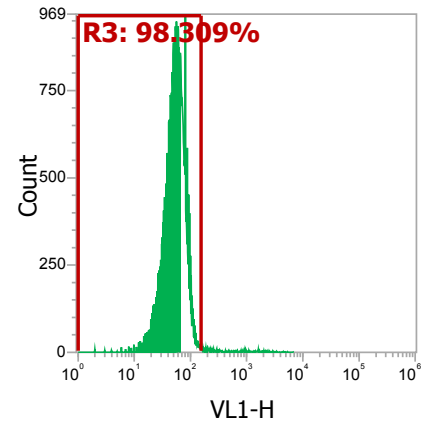

R3 - 5. Trypsin Cells+ 300ng per mL SE...

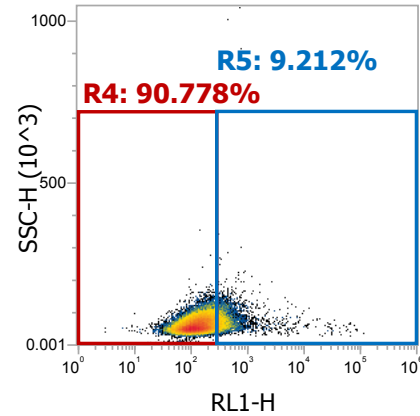

Experiment: **20220511**  
Sample: **5. Trypsin Cells+ 300ng per mL SEQ2 Cy5**  
Time Recorded: **14:50:11**

| Name       | Gate       | X Parameter | Y Parameter | Count  | %Total  | %Gated  |
|------------|------------|-------------|-------------|--------|---------|---------|
| All Events | All Events | N/A         | N/A         | 51,499 | 100.000 | 100.000 |
| R1         | R1         | FSC - FSC-H | SSC - SSC-H | 49,606 | 96.324  | 96.324  |
| R2         | R2         | FSC - FSC-A | FSC - FSC-H | 47,240 | 91.730  | 91.730  |
| R3         | R3         | VL1 - VL1-H |             | 46,441 | 90.178  | 98.309  |
| R4         | R4         | RL1 - RL1-H | SSC - SSC-H | 42,158 | 81.862  | 90.778  |
| R5         | R5         | RL1 - RL1-H | SSC - SSC-H | 4,278  | 8.307   | 9.212   |

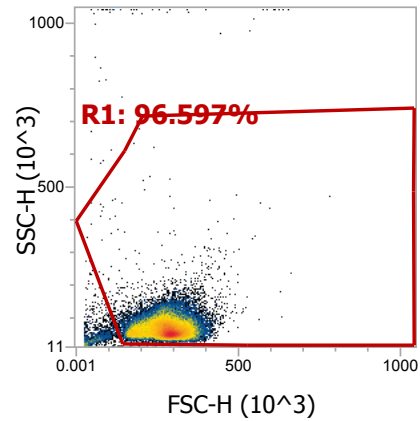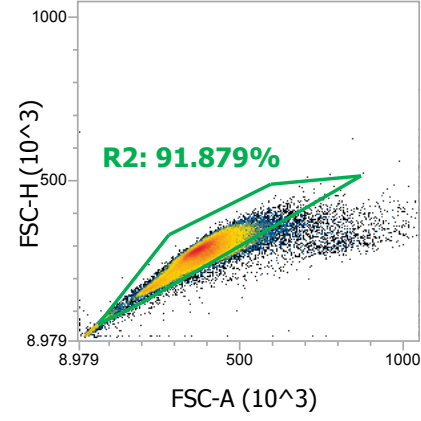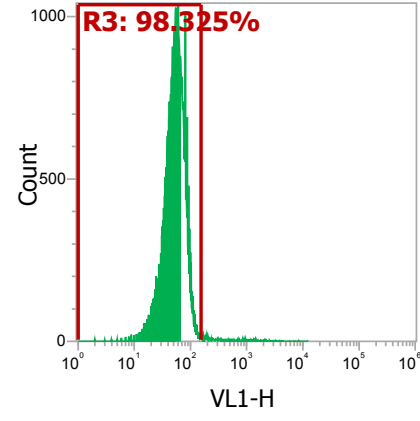

R3 - 6. Trypsin Cells+ 1000ng per mL S...

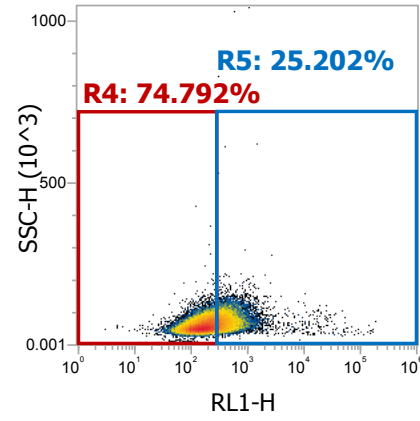

Experiment: **20220511**  
Sample: **6. Trypsin Cells+ 1000ng per mL SEQ2 Cy5**  
Time Recorded: **14:51:40**

| Name       | Gate       | X Parameter | Y Parameter | Count  | %Total  | %Gated  |
|------------|------------|-------------|-------------|--------|---------|---------|
| All Events | All Events | N/A         | N/A         | 55,179 | 100.000 | 100.000 |
| R1         | R1         | FSC - FSC-H | SSC - SSC-H | 53,301 | 96.597  | 96.597  |
| R2         | R2         | FSC - FSC-A | FSC - FSC-H | 50,698 | 91.879  | 91.879  |
| R3         | R3         | VL1 - VL1-H |             | 49,849 | 90.341  | 98.325  |
| R4         | R4         | RL1 - RL1-H | SSC - SSC-H | 37,283 | 67.567  | 74.792  |
| R5         | R5         | RL1 - RL1-H | SSC - SSC-H | 12,563 | 22.768  | 25.202  |

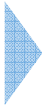

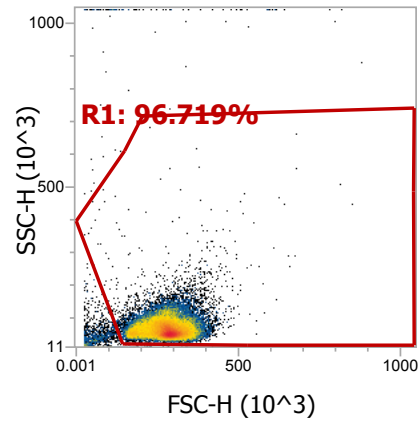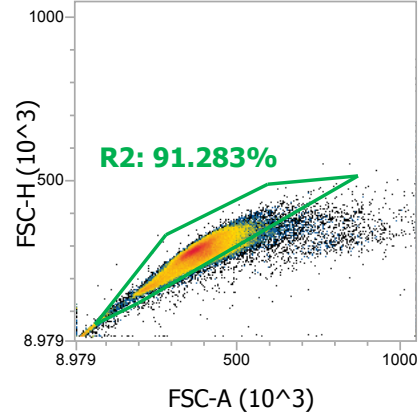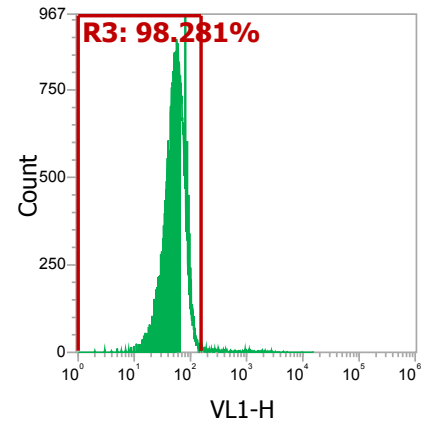

R3 - 7. Trypsin Cells+ 3000ng per mL S...

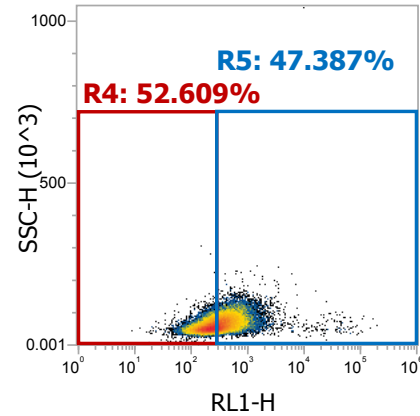

Experiment: **20220511**  
Sample: **7. Trypsin Cells+ 3000ng per mL SEQ2 Cy5**  
Time Recorded: **14:53:09**

| Name       | Gate       | X Parameter | Y Parameter | Count  | %Total  | %Gated  |
|------------|------------|-------------|-------------|--------|---------|---------|
| All Events | All Events | N/A         | N/A         | 49,136 | 100.000 | 100.000 |
| R1         | R1         | FSC - FSC-H | SSC - SSC-H | 47,524 | 96.719  | 96.719  |
| R2         | R2         | FSC - FSC-A | FSC - FSC-H | 44,853 | 91.283  | 91.283  |
| R3         | R3         | VL1 - VL1-H |             | 44,082 | 89.714  | 98.281  |
| R4         | R4         | RL1 - RL1-H | SSC - SSC-H | 23,191 | 47.198  | 52.609  |
| R5         | R5         | RL1 - RL1-H | SSC - SSC-H | 20,889 | 42.513  | 47.387  |

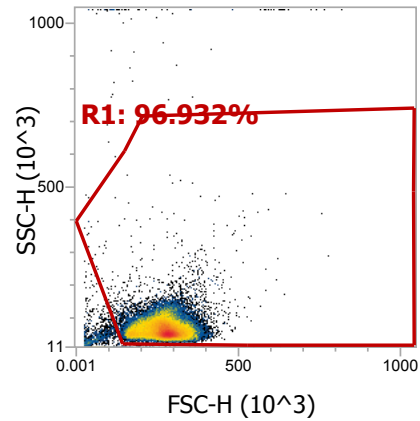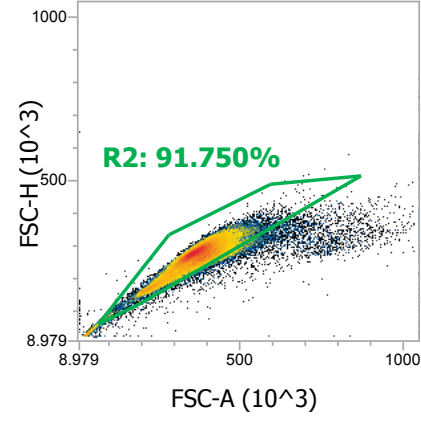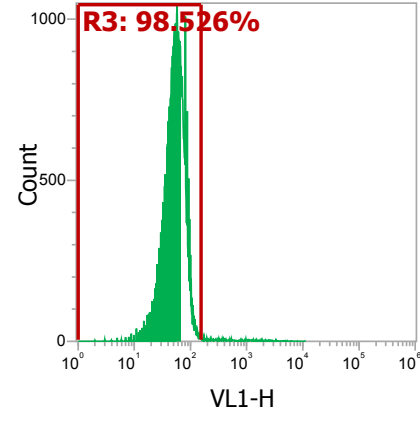

R3 - 8. Trypsin Cells+ 10000ng per mL...

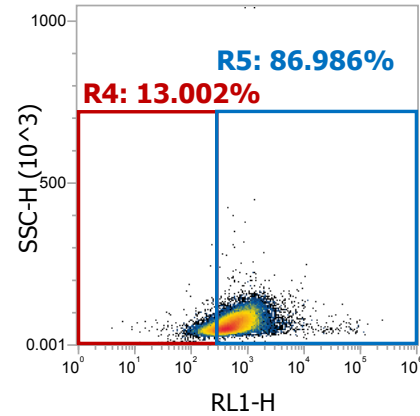

Experiment: **20220511**  
Sample: **8. Trypsin Cells+ 10000ng per mL SEQ2 Cy5**  
Time Recorded: **14:54:38**

| Name       | Gate       | X Parameter | Y Parameter | Count  | %Total  | %Gated  |
|------------|------------|-------------|-------------|--------|---------|---------|
| All Events | All Events | N/A         | N/A         | 55,021 | 100.000 | 100.000 |
| R1         | R1         | FSC - FSC-H | SSC - SSC-H | 53,333 | 96.932  | 96.932  |
| R2         | R2         | FSC - FSC-A | FSC - FSC-H | 50,482 | 91.750  | 91.750  |
| R3         | R3         | VL1 - VL1-H |             | 49,738 | 90.398  | 98.526  |
| R4         | R4         | RL1 - RL1-H | SSC - SSC-H | 6,467  | 11.754  | 13.002  |
| R5         | R5         | RL1 - RL1-H | SSC - SSC-H | 43,265 | 78.634  | 86.986  |



All Events - 1. NT Cells Only

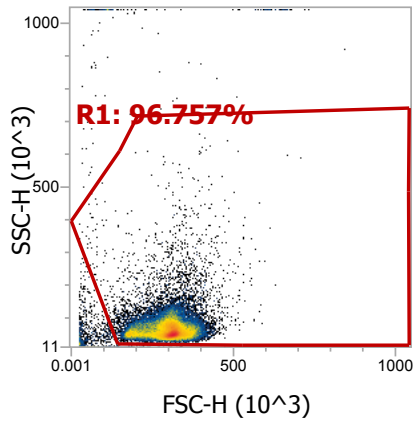

All Events - 1. NT Cells Only

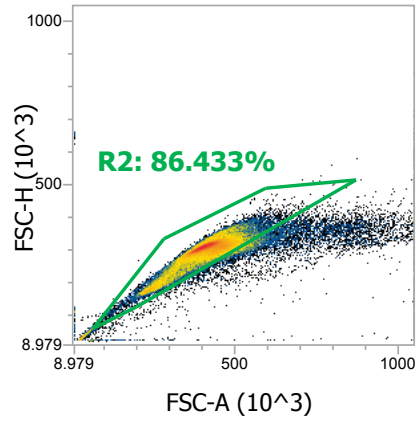

R2 - 1. NT Cells Only

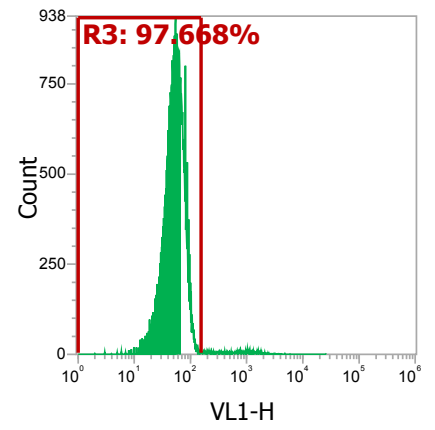

R3 - 1. NT Cells Only

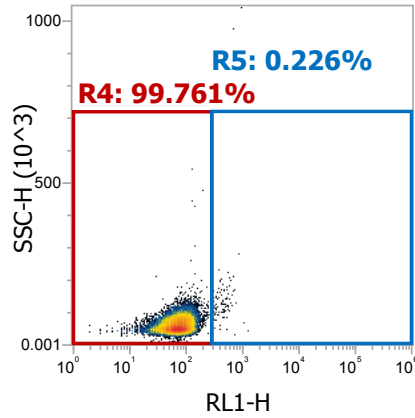Experiment: **20220511**Sample: **1. NT Cells Only**Time Recorded: **14:59:04**

| Name         | Gate       | X Parameter | Y Parameter | Count  | %Total  | %Gated  |
|--------------|------------|-------------|-------------|--------|---------|---------|
| △ All Events | All Events | N/A         | N/A         | 51,440 | 100.000 | 100.000 |
| ■ R1         | R1         | FSC - FSC-H | SSC - SSC-H | 49,772 | 96.757  | 96.757  |
| △ ■ R2       | R2         | FSC - FSC-A | FSC - FSC-H | 44,461 | 86.433  | 86.433  |
| △ ■ R3       | R3         | VL1 - VL1-H |             | 43,424 | 84.417  | 97.668  |
| ■ R4         | R4         | RL1 - RL1-H | SSC - SSC-H | 43,320 | 84.215  | 99.761  |
| ■ R5         | R5         | RL1 - RL1-H | SSC - SSC-H | 98     | 0.191   | 0.226   |

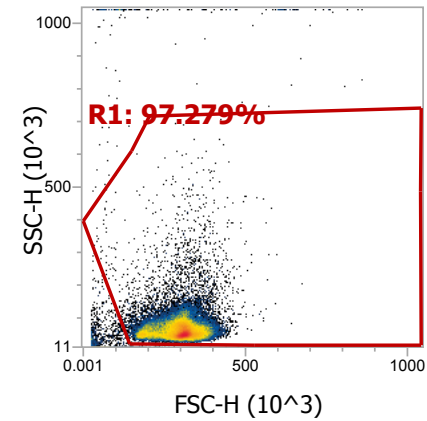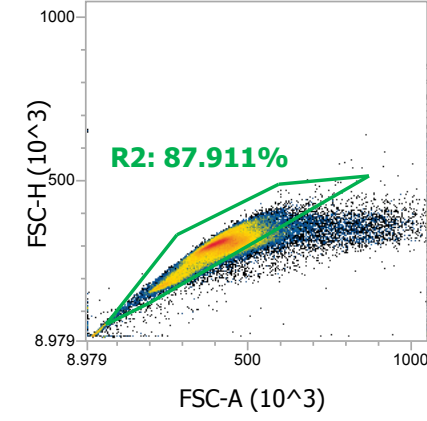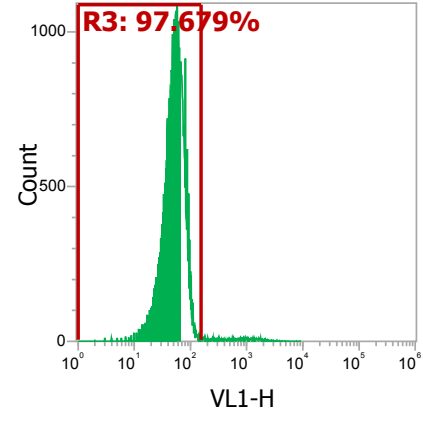

R3 - 2. NT Cells+ 10ng per mL SEQ2 Cy5

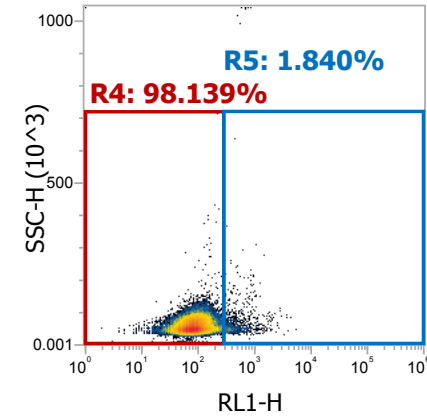

Experiment: **20220511**  
Sample: **2. NT Cells+ 10ng per mL SEQ2 Cy5**  
Time Recorded: **15:00:33**

| Name       | Gate       | X Parameter | Y Parameter | Count  | %Total  | %Gated  |
|------------|------------|-------------|-------------|--------|---------|---------|
| All Events | All Events | N/A         | N/A         | 60,079 | 100.000 | 100.000 |
| R1         | R1         | FSC - FSC-H | SSC - SSC-H | 58,444 | 97.279  | 97.279  |
| R2         | R2         | FSC - FSC-A | FSC - FSC-H | 52,816 | 87.911  | 87.911  |
| R3         | R3         | VL1 - VL1-H |             | 51,590 | 85.870  | 97.679  |
| R4         | R4         | RL1 - RL1-H | SSC - SSC-H | 50,630 | 84.272  | 98.139  |
| R5         | R5         | RL1 - RL1-H | SSC - SSC-H | 949    | 1.580   | 1.840   |

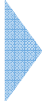

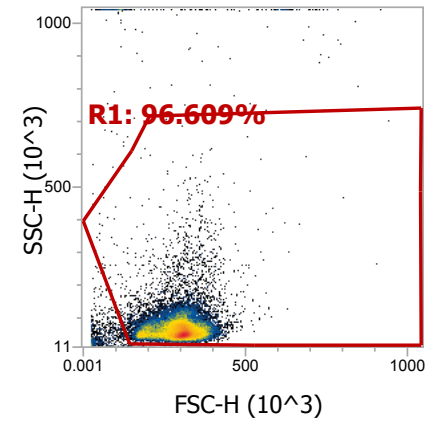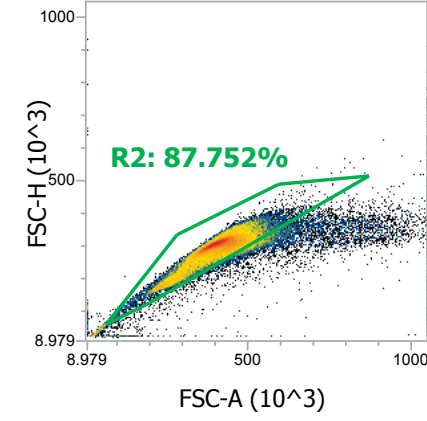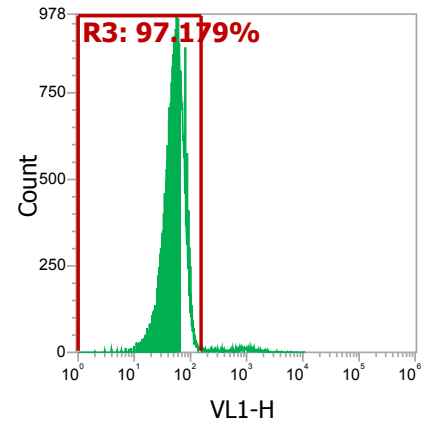

R3 - 3. NT Cells+ 30ng per mL SEQ2 Cy5

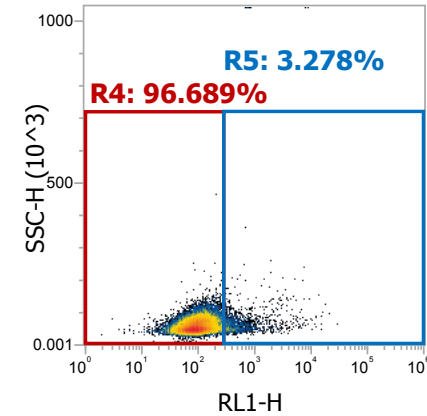

Experiment: **20220511**  
Sample: **3. NT Cells+ 30ng per mL SEQ2 Cy5**  
Time Recorded: **15:02:03**

| Name       | Gate       | X Parameter | Y Parameter | Count  | %Total  | %Gated  |
|------------|------------|-------------|-------------|--------|---------|---------|
| All Events | All Events | N/A         | N/A         | 53,517 | 100.000 | 100.000 |
| R1         | R1         | FSC - FSC-H | SSC - SSC-H | 51,702 | 96.609  | 96.609  |
| R2         | R2         | FSC - FSC-A | FSC - FSC-H | 46,962 | 87.752  | 87.752  |
| R3         | R3         | VL1 - VL1-H |             | 45,637 | 85.276  | 97.179  |
| R4         | R4         | RL1 - RL1-H | SSC - SSC-H | 44,126 | 82.452  | 96.689  |
| R5         | R5         | RL1 - RL1-H | SSC - SSC-H | 1,496  | 2.795   | 3.278   |

All Events - 4. NT Cells+ 100ng per mL...

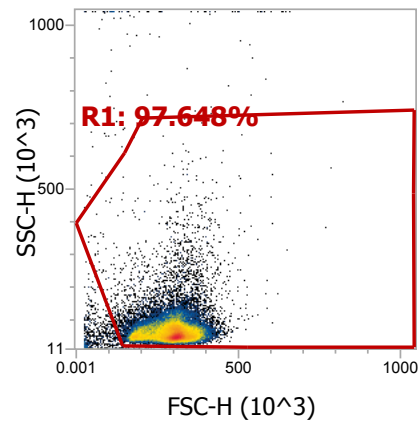

All Events - 4. NT Cells+ 100ng per mL...

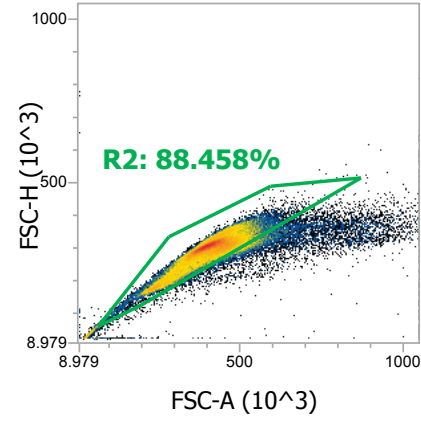

R2 - 4. NT Cells+ 100ng per mL SEQ2 C...

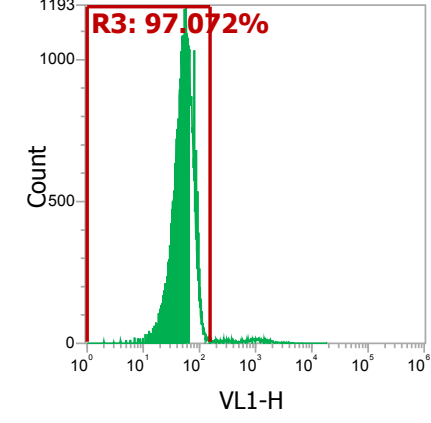

R3 - 4. NT Cells+ 100ng per mL SEQ2 C...

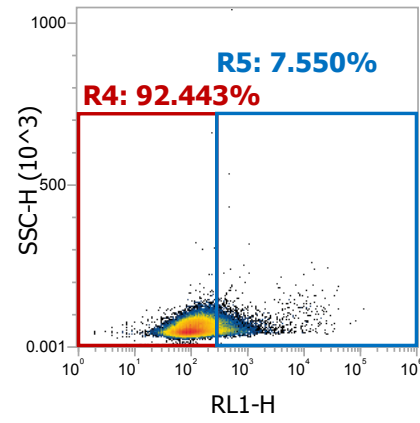

Experiment: **20220511**  
Sample: **4. NT Cells+ 100ng per mL SEQ2 Cy5**  
Time Recorded: **15:03:32**

| Name       | Gate       | X Parameter | Y Parameter | Count  | %Total  | %Gated  |
|------------|------------|-------------|-------------|--------|---------|---------|
| All Events | All Events | N/A         | N/A         | 64,445 | 100.000 | 100.000 |
| R1         | R1         | FSC - FSC-H | SSC - SSC-H | 62,929 | 97.648  | 97.648  |
| R2         | R2         | FSC - FSC-A | FSC - FSC-H | 57,007 | 88.458  | 88.458  |
| R3         | R3         | VL1 - VL1-H |             | 55,338 | 85.869  | 97.072  |
| R4         | R4         | RL1 - RL1-H | SSC - SSC-H | 51,156 | 79.379  | 92.443  |
| R5         | R5         | RL1 - RL1-H | SSC - SSC-H | 4,178  | 6.483   | 7.550   |

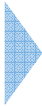

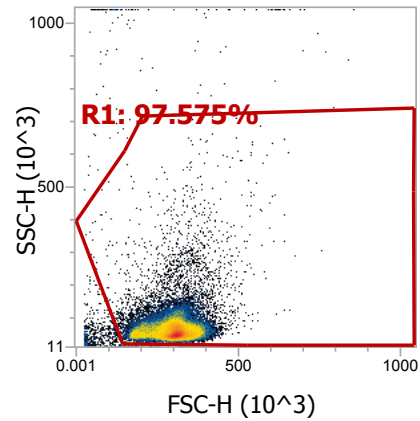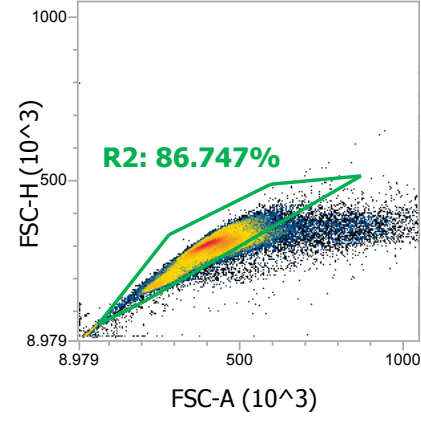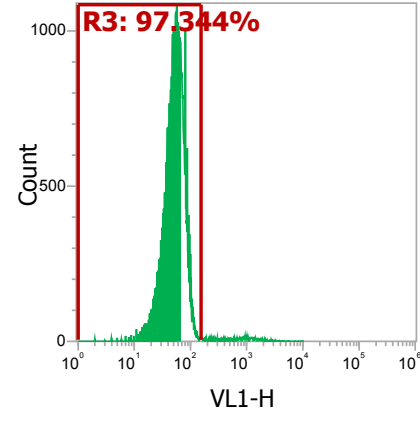

R3 - 5. NT Cells+ 300ng per mL SEQ2 C...

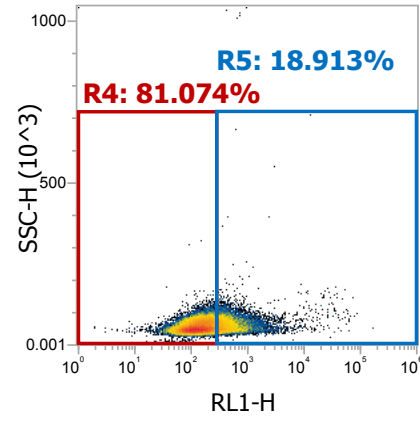

Experiment: **20220511**  
Sample: **5. NT Cells+ 300ng per mL SEQ2 Cy5**  
Time Recorded: **15:05:01**

| Name         | Gate       | X Parameter | Y Parameter | Count  | %Total  | %Gated  |
|--------------|------------|-------------|-------------|--------|---------|---------|
| ▢ All Events | All Events | N/A         | N/A         | 60,380 | 100.000 | 100.000 |
| ▢ R1         | R1         | FSC - FSC-H | SSC - SSC-H | 58,916 | 97.575  | 97.575  |
| ▢ R2         | R2         | FSC - FSC-A | FSC - FSC-H | 52,378 | 86.747  | 86.747  |
| ▢ R3         | R3         | VL1 - VL1-H |             | 50,987 | 84.444  | 97.344  |
| ▢ R4         | R4         | RL1 - RL1-H | SSC - SSC-H | 41,337 | 68.461  | 81.074  |
| ▢ R5         | R5         | RL1 - RL1-H | SSC - SSC-H | 9,643  | 15.971  | 18.913  |

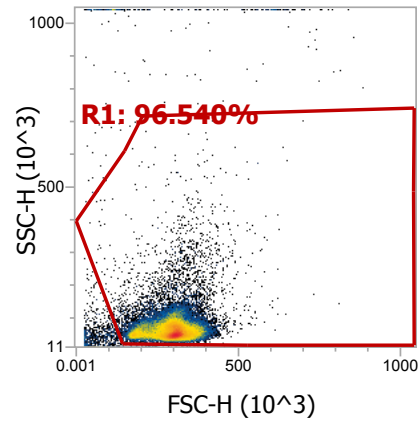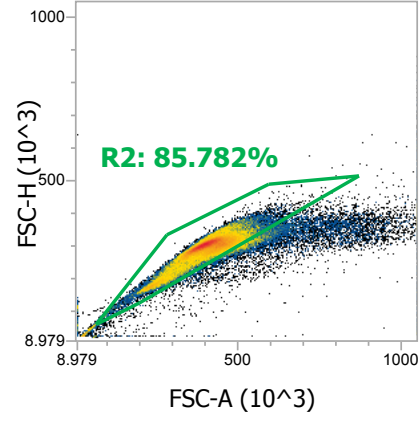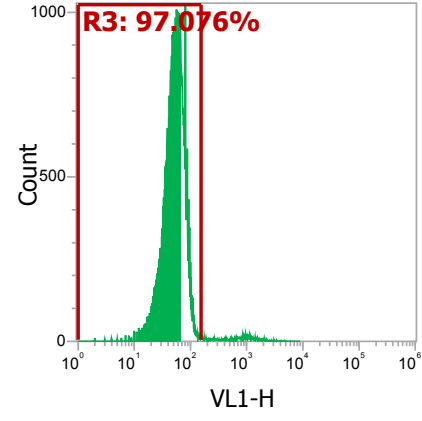

R3 - 6. NT Cells+ 1000ng per mL SEQ2...

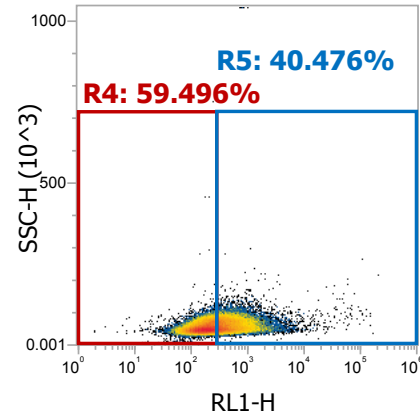

Experiment: **20220511**  
Sample: **6. NT Cells+ 1000ng per mL SEQ2 Cy5**  
Time Recorded: **15:06:30**

| Name       | Gate       | X Parameter | Y Parameter | Count  | %Total  | %Gated  |
|------------|------------|-------------|-------------|--------|---------|---------|
| All Events | All Events | N/A         | N/A         | 59,770 | 100.000 | 100.000 |
| R1         | R1         | FSC - FSC-H | SSC - SSC-H | 57,702 | 96.540  | 96.540  |
| R2         | R2         | FSC - FSC-A | FSC - FSC-H | 51,272 | 85.782  | 85.782  |
| R3         | R3         | VL1 - VL1-H |             | 49,773 | 83.274  | 97.076  |
| R4         | R4         | RL1 - RL1-H | SSC - SSC-H | 29,613 | 49.545  | 59.496  |
| R5         | R5         | RL1 - RL1-H | SSC - SSC-H | 20,146 | 33.706  | 40.476  |

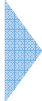

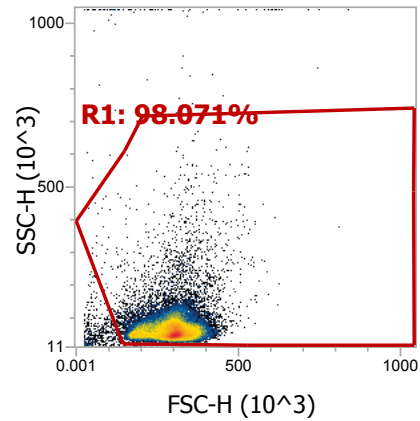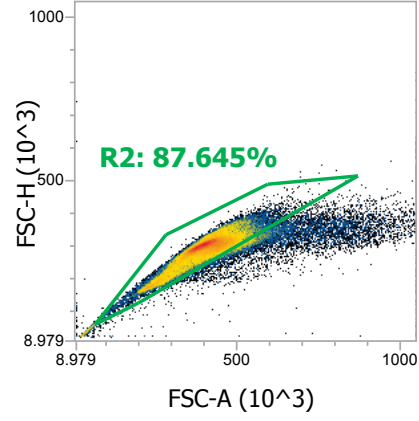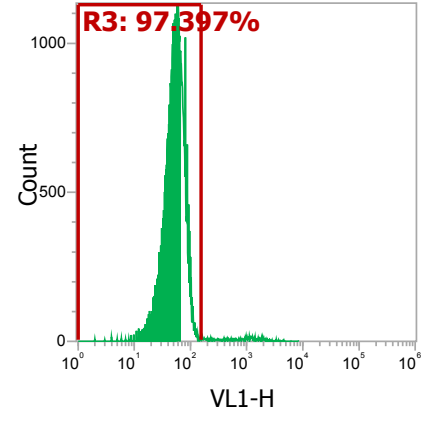

R3 - 7. NT Cells+ 3000ng per mL SEQ2...

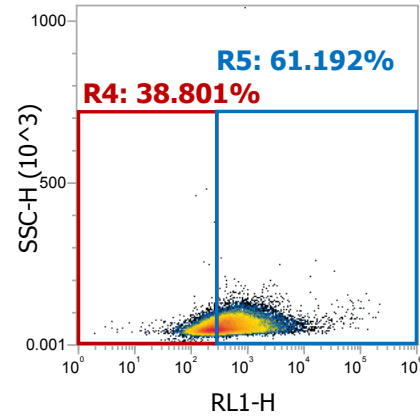

Experiment: **20220511**  
Sample: **7. NT Cells+ 3000ng per mL SEQ2 Cy5**  
Time Recorded: **15:07:58**

| Name       | Gate       | X Parameter | Y Parameter | Count  | %Total  | %Gated  |
|------------|------------|-------------|-------------|--------|---------|---------|
| All Events | All Events | N/A         | N/A         | 63,333 | 100.000 | 100.000 |
| R1         | R1         | FSC - FSC-H | SSC - SSC-H | 62,111 | 98.071  | 98.071  |
| R2         | R2         | FSC - FSC-A | FSC - FSC-H | 55,508 | 87.645  | 87.645  |
| R3         | R3         | VL1 - VL1-H |             | 54,063 | 85.363  | 97.397  |
| R4         | R4         | RL1 - RL1-H | SSC - SSC-H | 20,977 | 33.122  | 38.801  |
| R5         | R5         | RL1 - RL1-H | SSC - SSC-H | 33,082 | 52.235  | 61.192  |

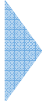

All Events - 8. NT Cells+ 10000ng per m... All Events - 8. NT Cells+ 10000ng per m... R2 - 8. NT Cells+ 10000ng per mL SEQ...

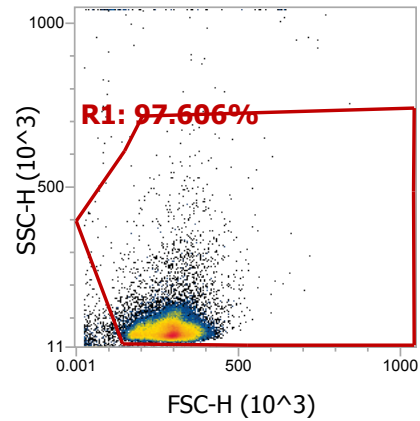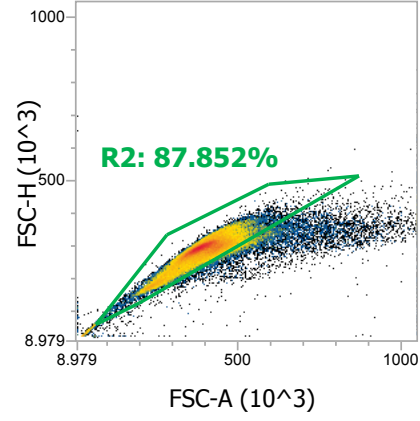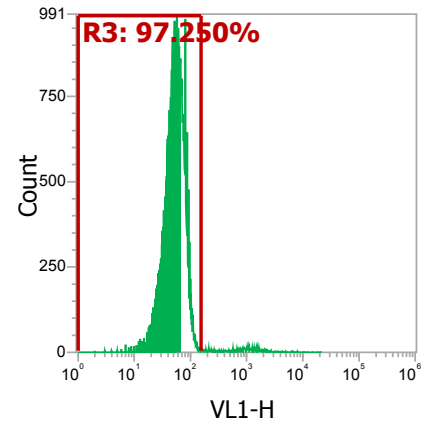

R3 - 8. NT Cells+ 10000ng per mL SEQ...

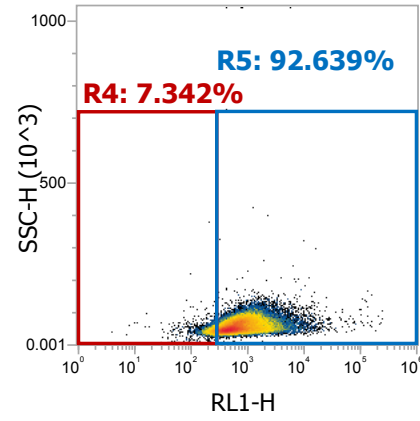

Experiment: **20220511**  
Sample: **8. NT Cells+ 10000ng per mL SEQ2 Cy5**  
Time Recorded: **15:09:27**

| Name       | Gate       | X Parameter | Y Parameter | Count  | %Total  | %Gated  |
|------------|------------|-------------|-------------|--------|---------|---------|
| All Events | All Events | N/A         | N/A         | 55,226 | 100.000 | 100.000 |
| R1         | R1         | FSC - FSC-H | SSC - SSC-H | 53,904 | 97.606  | 97.606  |
| R2         | R2         | FSC - FSC-A | FSC - FSC-H | 48,517 | 87.852  | 87.852  |
| R3         | R3         | VL1 - VL1-H |             | 47,183 | 85.436  | 97.250  |
| R4         | R4         | RL1 - RL1-H | SSC - SSC-H | 3,464  | 6.272   | 7.342   |
| R5         | R5         | RL1 - RL1-H | SSC - SSC-H | 43,710 | 79.148  | 92.639  |
