# Supplementary material for: A retrotransposon-derived DNA zip code internalizes myeloma cells through Clathrin-Rab5a-mediated endocytosis
Source: Frontiers journal article supplement (doi:10.3389/fonc.2024.1288724), 2024-02-23
Supplement: Data_Sheet_1.ZIP [file Data_Sheet_1.ZIP]

All Events - 2. NT Cells+SEQ2 Cy5

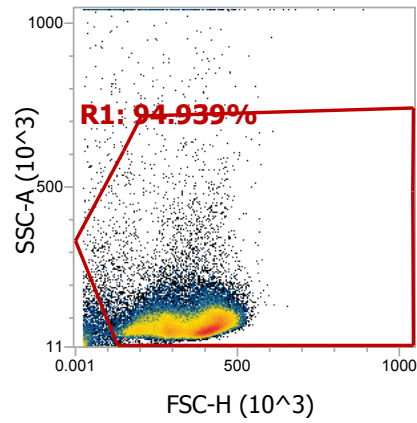

R1 - 2. NT Cells+SEQ2 Cy5

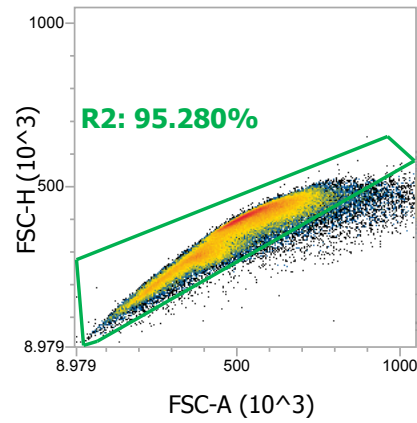

R2 - 2. NT Cells+SEQ2 Cy5

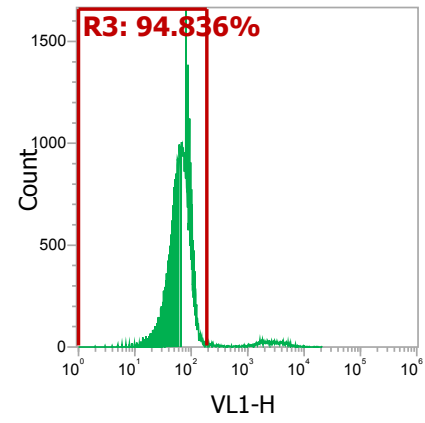

R3 - 2. NT Cells+SEQ2 Cy5

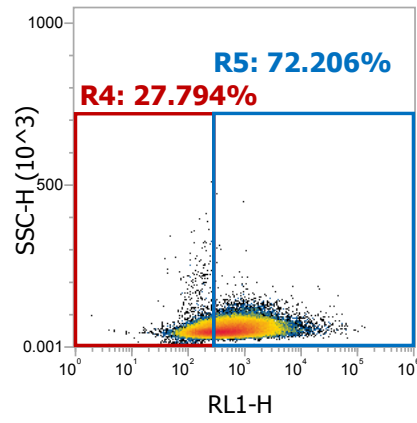

Experiment: **20210901**  
Sample: **2. NT Cells+SEQ2 Cy5**  
Time Recorded: **19:07:41**

| Name       | Gate       | X Parameter | Y Parameter | Count  | %Total  | %Gated  |
|------------|------------|-------------|-------------|--------|---------|---------|
| All Events | All Events | N/A         | N/A         | 68,845 | 100.000 | 100.000 |
| R1         | R1         | FSC - FSC-H | SSC - SSC-A | 65,361 | 94.939  | 94.939  |
| R2         | R2         | FSC - FSC-A | FSC - FSC-H | 62,276 | 90.458  | 95.280  |
| R3         | R3         | VL1 - VL1-H |             | 59,060 | 85.787  | 94.836  |
| R4         | R4         | RL1 - RL1-H | SSC - SSC-H | 16,415 | 23.843  | 27.794  |
| R5         | R5         | RL1 - RL1-H | SSC - SSC-H | 42,645 | 61.943  | 72.206  |

All Events - 3. NT Cells+SEQ2 Cy5

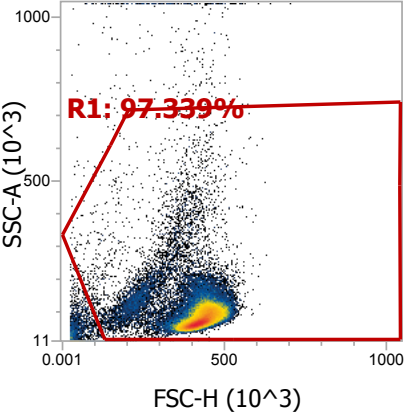

R1 - 3. NT Cells+SEQ2 Cy5

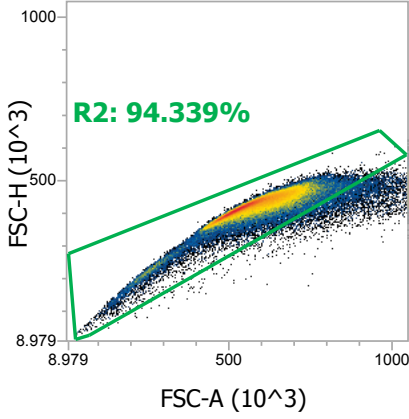

R2 - 3. NT Cells+SEQ2 Cy5

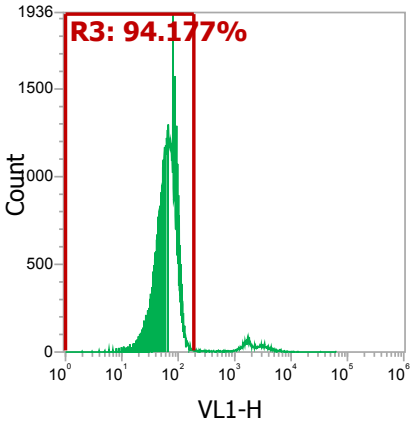

R3 - 3. NT Cells+SEQ2 Cy5

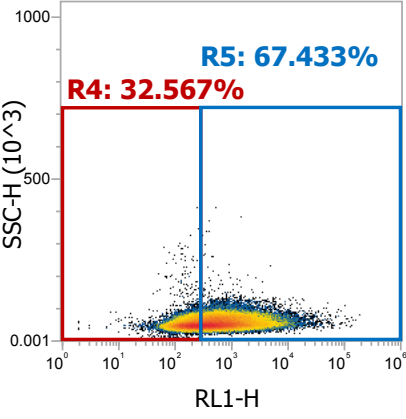

Experiment: **20210908**  
Sample: **3. NT Cells+SEQ2 Cy5**  
Time Recorded: **17:49:14**

| Name         | Gate       | X Parameter | Y Parameter | Count  | %Total  | %Gated  |
|--------------|------------|-------------|-------------|--------|---------|---------|
| ▢ All Events | All Events | N/A         | N/A         | 83,009 | 100.000 | 100.000 |
| ▢ R1         | R1         | FSC - FSC-H | SSC - SSC-A | 80,800 | 97.339  | 97.339  |
| ▢ R2         | R2         | FSC - FSC-A | FSC - FSC-H | 76,226 | 91.829  | 94.339  |
| ▢ R3         | R3         | VL1 - VL1-H |             | 71,787 | 86.481  | 94.177  |
| ▢ R4         | R4         | RL1 - RL1-H | SSC - SSC-H | 23,379 | 28.164  | 32.567  |
| ▢ R5         | R5         | RL1 - RL1-H | SSC - SSC-H | 48,408 | 58.317  | 67.433  |

All Events - 4. NT Cells+SEQ2 Cy5

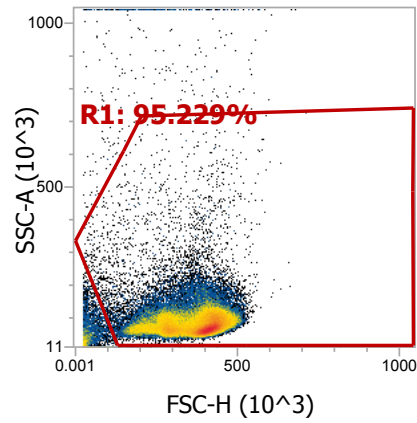

R1 - 4. NT Cells+SEQ2 Cy5

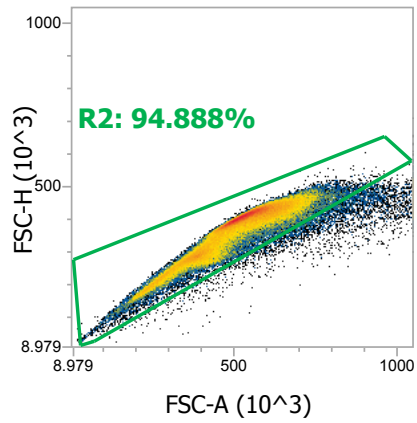

R2 - 4. NT Cells+SEQ2 Cy5

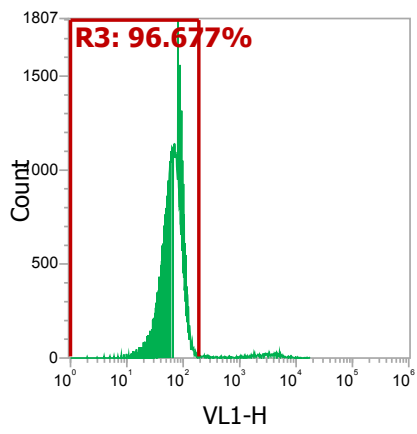

R3 - 4. NT Cells+SEQ2 Cy5

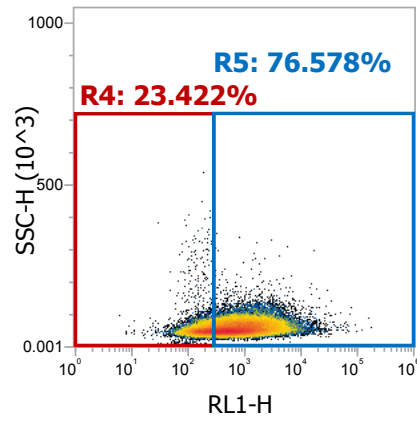

Experiment: **20210917**  
Sample: **4. NT Cells+SEQ2 Cy5**  
Time Recorded: **15:17:18**

| Name       | Gate       | X Parameter | Y Parameter | Count  | %Total  | %Gated  |
|------------|------------|-------------|-------------|--------|---------|---------|
| All Events | All Events | N/A         | N/A         | 76,188 | 100.000 | 100.000 |
| R1         | R1         | FSC - FSC-H | SSC - SSC-A | 72,553 | 95.229  | 95.229  |
| R2         | R2         | FSC - FSC-A | FSC - FSC-H | 68,844 | 90.361  | 94.888  |
| R3         | R3         | VL1 - VL1-H |             | 66,556 | 87.358  | 96.677  |
| R4         | R4         | RL1 - RL1-H | SSC - SSC-H | 15,589 | 20.461  | 23.422  |
| R5         | R5         | RL1 - RL1-H | SSC - SSC-H | 50,967 | 66.896  | 76.578  |
