# Supplementary material for: A retrotransposon-derived DNA zip code internalizes myeloma cells through Clathrin-Rab5a-mediated endocytosis
Source: Frontiers journal article supplement (doi:10.3389/fonc.2024.1288724), 2024-02-23
Supplement: Data_Sheet_1.ZIP [file Data_Sheet_1.ZIP]

All Events - 1. Trypsin Cells+SEQ2 Cy5

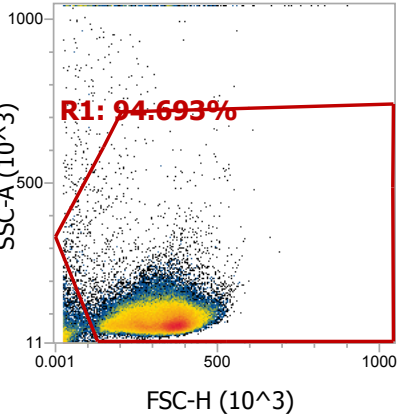

R1 - 1. Trypsin Cells+SEQ2 Cy5

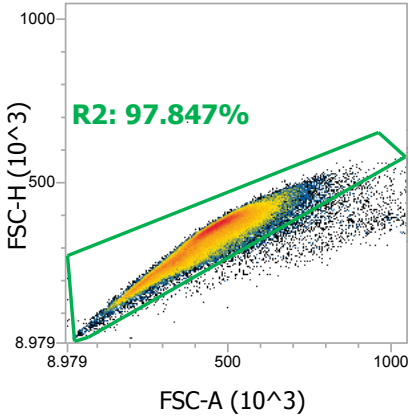

R2 - 1. Trypsin Cells+SEQ2 Cy5

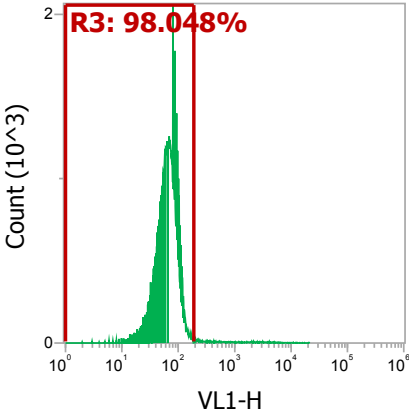

R3 - 1. Trypsin Cells+SEQ2 Cy5

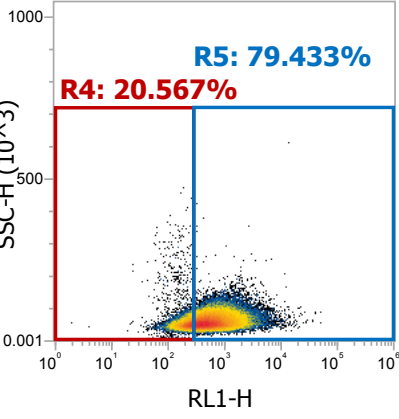

Experiment: **20210901**  
Sample: **1. Trypsin Cells+SEQ2 Cy5**  
Time Recorded: **12:45:10**

| Name       | Gate       | X Parameter | Y Parameter | Count  | %Total  | %Gated  |
|------------|------------|-------------|-------------|--------|---------|---------|
| All Events | All Events | N/A         | N/A         | 81,615 | 100.000 | 100.000 |
| R1         | R1         | FSC - FSC-H | SSC - SSC-A | 77,284 | 94.693  | 94.693  |
| R2         | R2         | FSC - FSC-A | FSC - FSC-H | 75,620 | 92.655  | 97.847  |
| R3         | R3         | VL1 - VL1-H |             | 74,144 | 90.846  | 98.048  |
| R4         | R4         | RL1 - RL1-H | SSC - SSC-H | 15,249 | 18.684  | 20.567  |
| R5         | R5         | RL1 - RL1-H | SSC - SSC-H | 58,895 | 72.162  | 79.433  |

All Events - 2. Trypsin Cells+SEQ2 Cy5

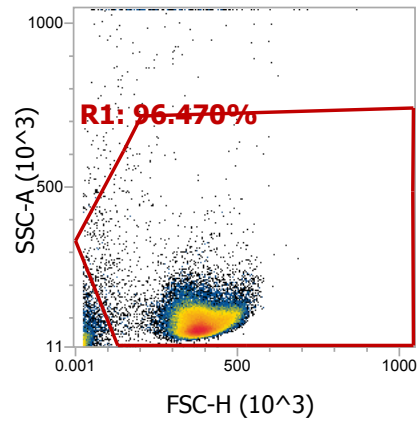

R1 - 2. Trypsin Cells+SEQ2 Cy5

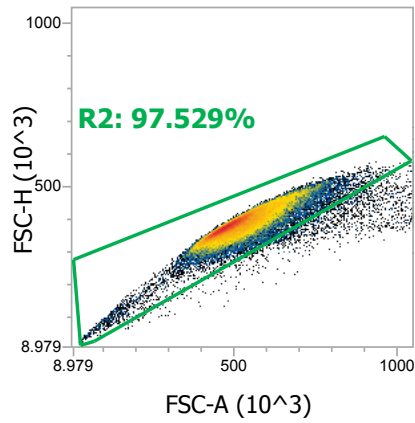

R2 - 2. Trypsin Cells+SEQ2 Cy5

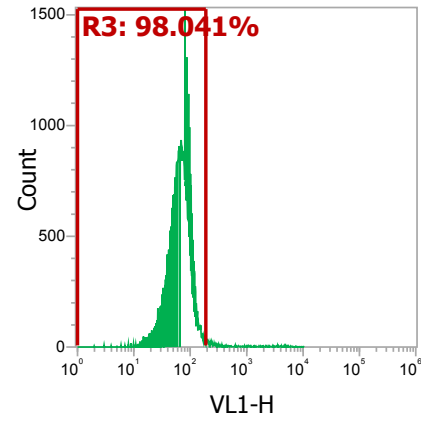

R3 - 2. Trypsin Cells+SEQ2 Cy5

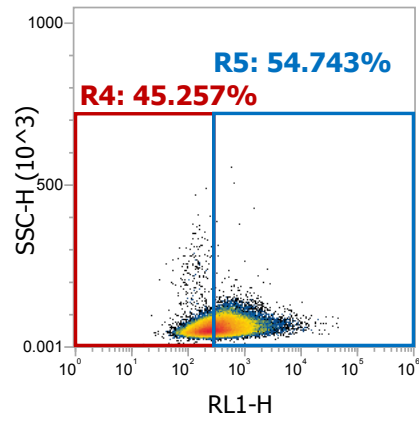

Experiment: **20210908**  
Sample: **2. Trypsin Cells+SEQ2 Cy5**  
Time Recorded: **09:37:18**

| Name         | Gate       | X Parameter | Y Parameter | Count  | %Total  | %Gated  |
|--------------|------------|-------------|-------------|--------|---------|---------|
| △ All Events | All Events | N/A         | N/A         | 61,363 | 100.000 | 100.000 |
| △ R1         | R1         | FSC - FSC-H | SSC - SSC-A | 59,197 | 96.470  | 96.470  |
| △ R2         | R2         | FSC - FSC-A | FSC - FSC-H | 57,734 | 94.086  | 97.529  |
| △ R3         | R3         | VL1 - VL1-H |             | 56,603 | 92.243  | 98.041  |
| R4           | R4         | RL1 - RL1-H | SSC - SSC-H | 25,617 | 41.747  | 45.257  |
| R5           | R5         | RL1 - RL1-H | SSC - SSC-H | 30,986 | 50.496  | 54.743  |

All Events - 3. Trypsin Cells+SEQ2 Cy5

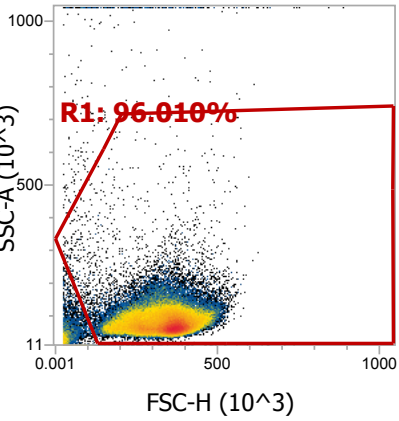

All Events - 3. Trypsin Cells+SEQ2 Cy5

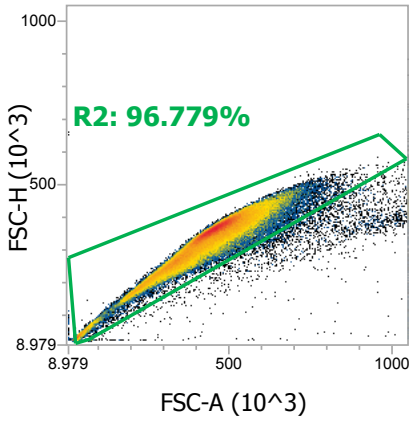

R2 - 3. Trypsin Cells+SEQ2 Cy5

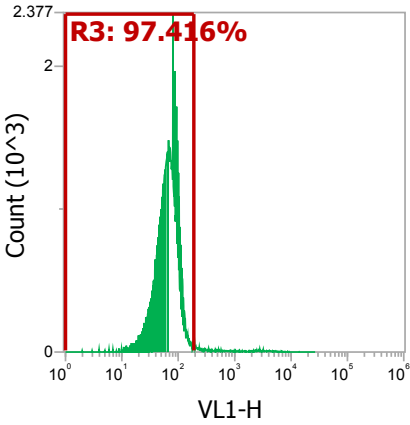

R3 - 3. Trypsin Cells+SEQ2 Cy5

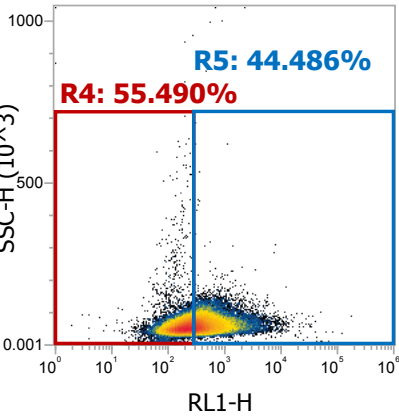

Experiment: **20210910**  
Sample: **3. Trypsin Cells+SEQ2 Cy5**  
Time Recorded: **12:44:21**

| Name         | Gate       | X Parameter | Y Parameter | Count  | %Total  | %Gated  |
|--------------|------------|-------------|-------------|--------|---------|---------|
| ▢ All Events | All Events | N/A         | N/A         | 92,448 | 100.000 | 100.000 |
| ▢ R1         | R1         | FSC - FSC-H | SSC - SSC-A | 88,759 | 96.010  | 96.010  |
| ▢ R2         | R2         | FSC - FSC-A | FSC - FSC-H | 89,470 | 96.779  | 96.779  |
| ▢ R3         | R3         | VL1 - VL1-H |             | 87,158 | 94.278  | 97.416  |
| ▢ R4         | R4         | RL1 - RL1-H | SSC - SSC-H | 48,364 | 52.315  | 55.490  |
| ▢ R5         | R5         | RL1 - RL1-H | SSC - SSC-H | 38,773 | 41.940  | 44.486  |

All Events - 4. Trypsin Cells+SEQ2 Cy5

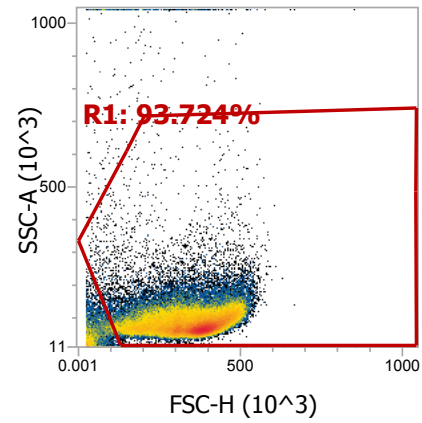

R1 - 4. Trypsin Cells+SEQ2 Cy5

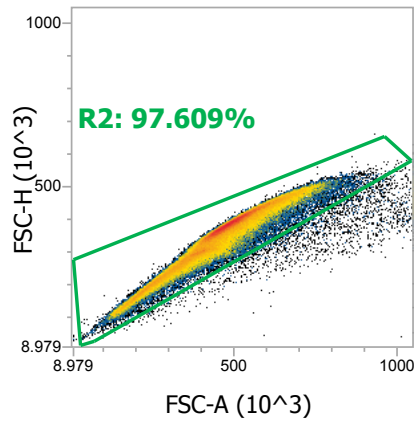

R2 - 4. Trypsin Cells+SEQ2 Cy5

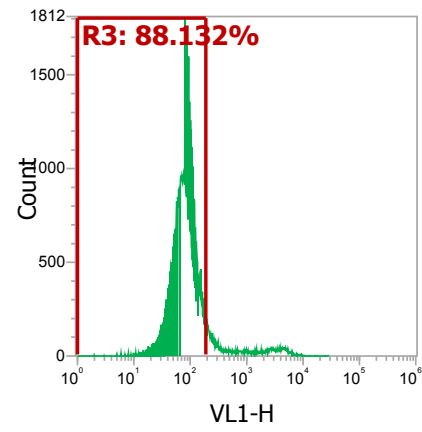

R3 - 4. Trypsin Cells+SEQ2 Cy5

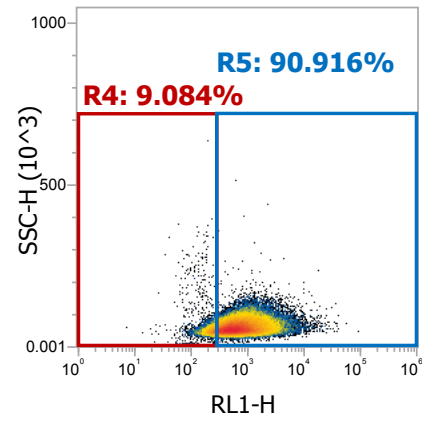

Experiment: **20210917**  
Sample: **4. Trypsin Cells+SEQ2 Cy5**  
Time Recorded: **11:35:33**

| Name         | Gate       | X Parameter | Y Parameter | Count  | %Total  | %Gated  |
|--------------|------------|-------------|-------------|--------|---------|---------|
| △ All Events | All Events | N/A         | N/A         | 91,256 | 100.000 | 100.000 |
| △ R1         | R1         | FSC - FSC-H | SSC - SSC-A | 85,529 | 93.724  | 93.724  |
| △ R2         | R2         | FSC - FSC-A | FSC - FSC-H | 83,484 | 91.483  | 97.609  |
| △ R3         | R3         | VL1 - VL1-H |             | 73,576 | 80.626  | 88.132  |
| R4           | R4         | RL1 - RL1-H | SSC - SSC-H | 6,684  | 7.324   | 9.084   |
| R5           | R5         | RL1 - RL1-H | SSC - SSC-H | 66,892 | 73.301  | 90.916  |
