# Supplementary material for: A retrotransposon-derived DNA zip code internalizes myeloma cells through Clathrin-Rab5a-mediated endocytosis
Source: Frontiers journal article supplement (doi:10.3389/fonc.2024.1288724), 2024-02-23
Supplement: Data_Sheet_1.ZIP [file Data_Sheet_1.ZIP]

All Events - 2. NT Cells+SEQ2 Cy5

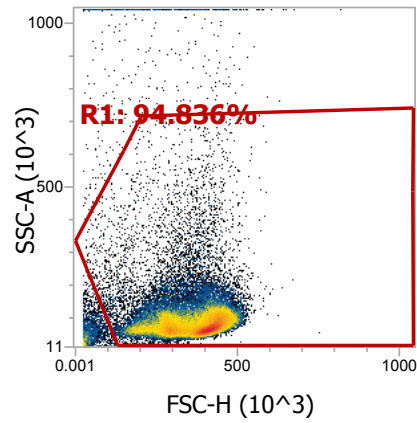

R1 - 2. NT Cells+SEQ2 Cy5

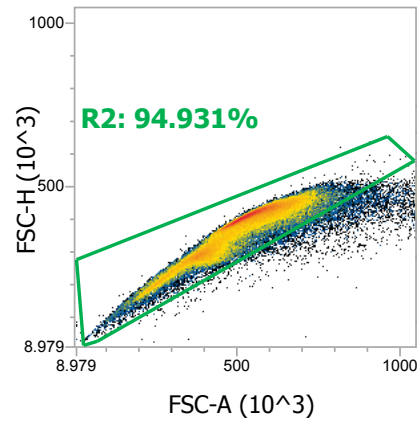

R2 - 2. NT Cells+SEQ2 Cy5

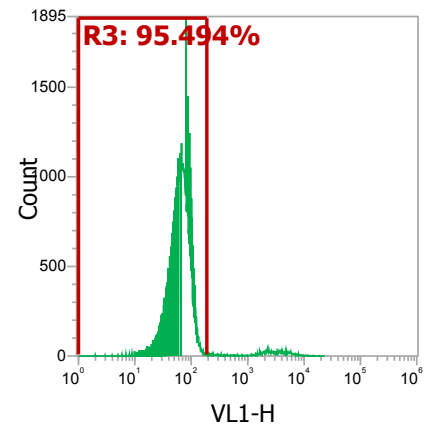

R3 - 2. NT Cells+SEQ2 Cy5

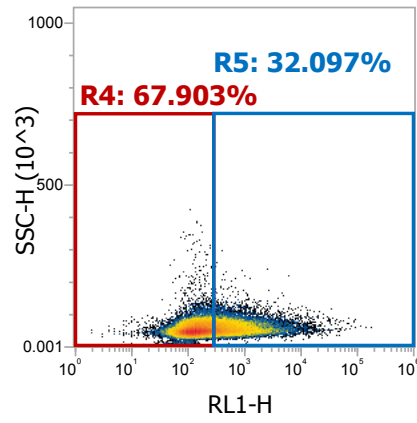

Experiment: **20210901**  
Sample: **2. NT Cells+SEQ2 Cy5**  
Time Recorded: **10:31:16**

| Name         | Gate       | X Parameter | Y Parameter | Count  | %Total  | %Gated  |
|--------------|------------|-------------|-------------|--------|---------|---------|
| ▢ All Events | All Events | N/A         | N/A         | 75,214 | 100.000 | 100.000 |
| ▢ R1         | R1         | FSC - FSC-H | SSC - SSC-A | 71,330 | 94.836  | 94.836  |
| ▢ R2         | R2         | FSC - FSC-A | FSC - FSC-H | 67,714 | 90.028  | 94.931  |
| ▢ R3         | R3         | VL1 - VL1-H |             | 64,663 | 85.972  | 95.494  |
| ▢ R4         | R4         | RL1 - RL1-H | SSC - SSC-H | 43,908 | 58.377  | 67.903  |
| ▢ R5         | R5         | RL1 - RL1-H | SSC - SSC-H | 20,755 | 27.595  | 32.097  |

All Events - 3. NT Cells+SEQ2 Cy5

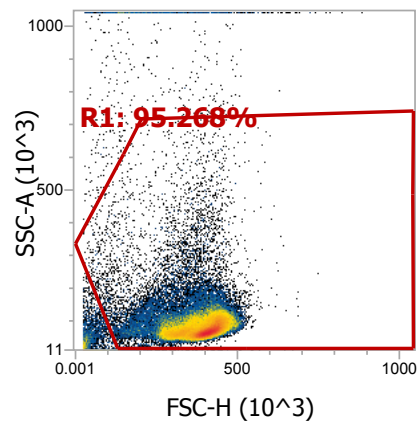

All Events - 3. NT Cells+SEQ2 Cy5

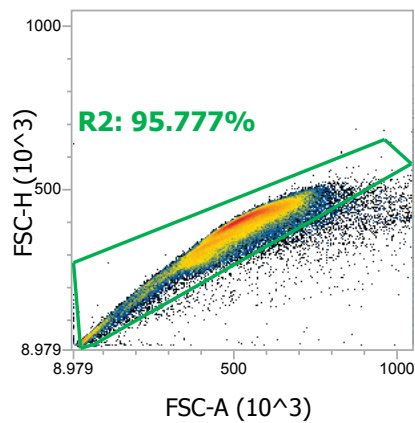

R2 - 3. NT Cells+SEQ2 Cy5

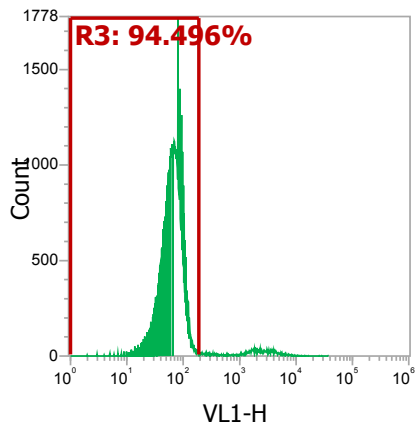

R3 - 3. NT Cells+SEQ2 Cy5

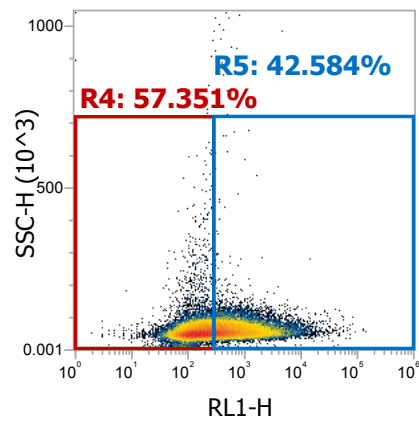

Experiment: **20210903**

Sample: **3. NT Cells+SEQ2 Cy5**

Time Recorded: **12:31:47**

| Name         | Gate       | X Parameter | Y Parameter | Count  | %Total  | %Gated  |
|--------------|------------|-------------|-------------|--------|---------|---------|
| △ All Events | All Events | N/A         | N/A         | 73,027 | 100.000 | 100.000 |
| ■ R1         | R1         | FSC - FSC-H | SSC - SSC-A | 69,571 | 95.268  | 95.268  |
| △ ■ R2       | R2         | FSC - FSC-A | FSC - FSC-H | 69,943 | 95.777  | 95.777  |
| △ ■ R3       | R3         | VL1 - VL1-H |             | 66,093 | 90.505  | 94.496  |
| ■ R4         | R4         | RL1 - RL1-H | SSC - SSC-H | 37,905 | 51.905  | 57.351  |
| ■ R5         | R5         | RL1 - RL1-H | SSC - SSC-H | 28,145 | 38.541  | 42.584  |

All Events - 4. NT Cells+SEQ2 Cy5

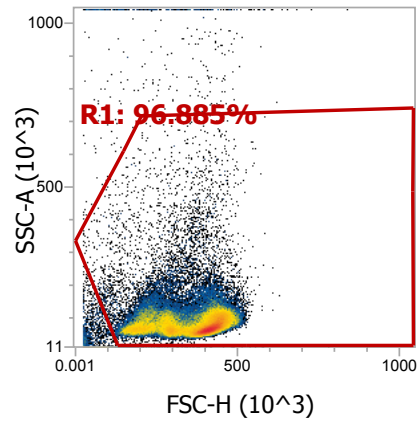

R1 - 4. NT Cells+SEQ2 Cy5

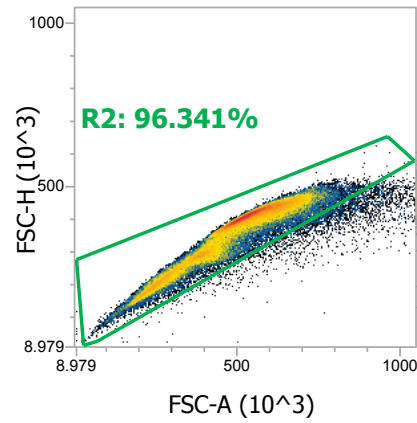

R2 - 4. NT Cells+SEQ2 Cy5

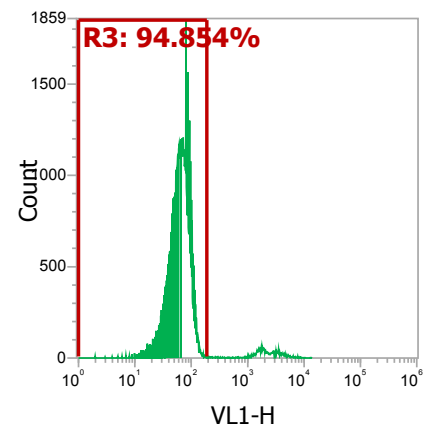

R3 - 4. NT Cells+SEQ2 Cy5

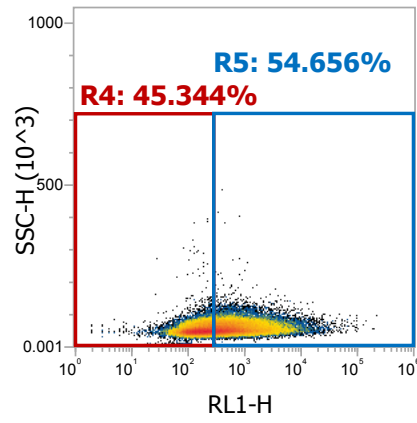

Experiment: **20210908**  
Sample: **4. NT Cells+SEQ2 Cy5**  
Time Recorded: **11:53:00**

| Name         | Gate       | X Parameter | Y Parameter | Count  | %Total  | %Gated  |
|--------------|------------|-------------|-------------|--------|---------|---------|
| ▢ All Events | All Events | N/A         | N/A         | 78,172 | 100.000 | 100.000 |
| ▢ R1         | R1         | FSC - FSC-H | SSC - SSC-A | 75,737 | 96.885  | 96.885  |
| ▢ R2         | R2         | FSC - FSC-A | FSC - FSC-H | 72,966 | 93.340  | 96.341  |
| ▢ R3         | R3         | VL1 - VL1-H |             | 69,211 | 88.537  | 94.854  |
| ▢ R4         | R4         | RL1 - RL1-H | SSC - SSC-H | 31,383 | 40.146  | 45.344  |
| ▢ R5         | R5         | RL1 - RL1-H | SSC - SSC-H | 37,828 | 48.391  | 54.656  |

All Events - 5. NT Cells+SEQ2 Cy5

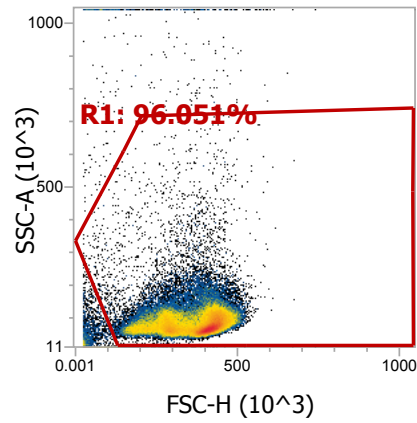

R1 - 5. NT Cells+SEQ2 Cy5

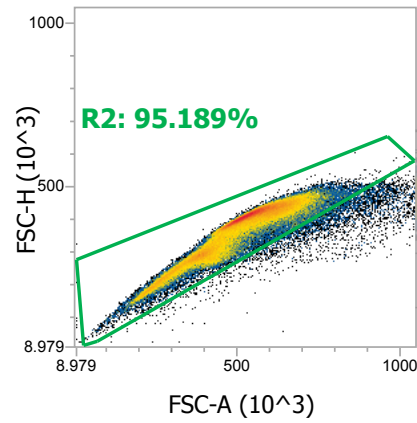

R2 - 5. NT Cells+SEQ2 Cy5

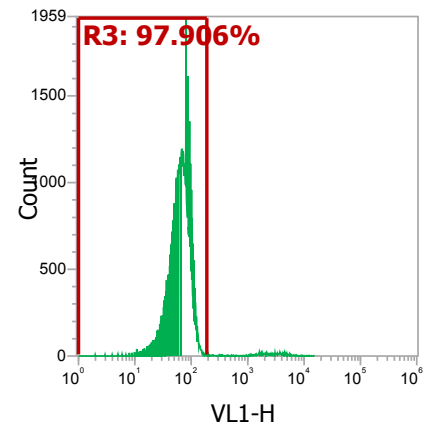

R3 - 5. NT Cells+SEQ2 Cy5

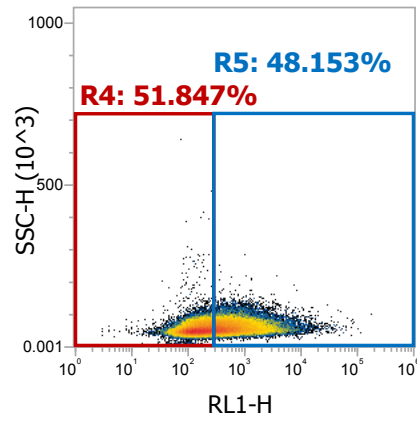

Experiment: **20210917**  
Sample: **5. NT Cells+SEQ2 Cy5**  
Time Recorded: **09:16:10**

| Name         | Gate       | X Parameter | Y Parameter | Count  | %Total  | %Gated  |
|--------------|------------|-------------|-------------|--------|---------|---------|
| ▢ All Events | All Events | N/A         | N/A         | 76,199 | 100.000 | 100.000 |
| ▢ R1         | R1         | FSC - FSC-H | SSC - SSC-A | 73,190 | 96.051  | 96.051  |
| ▢ R2         | R2         | FSC - FSC-A | FSC - FSC-H | 69,669 | 91.430  | 95.189  |
| ▢ R3         | R3         | VL1 - VL1-H |             | 68,210 | 89.516  | 97.906  |
| ▢ R4         | R4         | RL1 - RL1-H | SSC - SSC-H | 35,365 | 46.411  | 51.847  |
| ▢ R5         | R5         | RL1 - RL1-H | SSC - SSC-H | 32,845 | 43.104  | 48.153  |

All Events - 6. NT Cells+SEQ2 Cy5

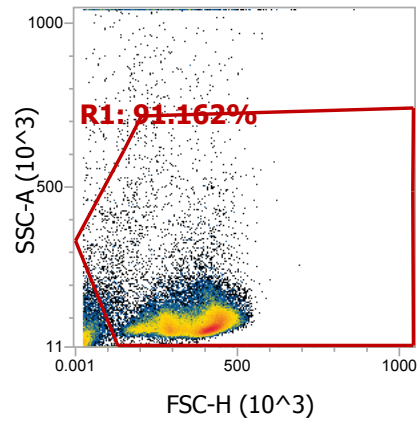

R1 - 6. NT Cells+SEQ2 Cy5

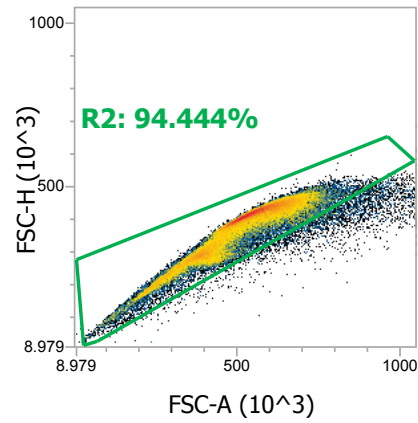

R2 - 6. NT Cells+SEQ2 Cy5

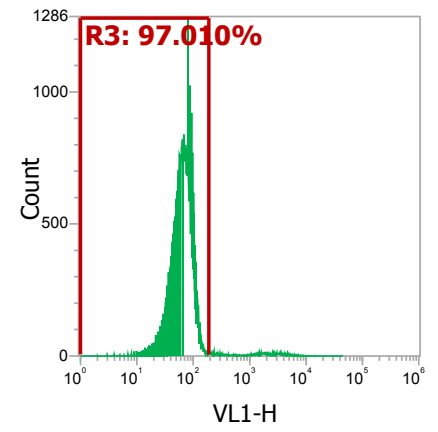

R3 - 6. NT Cells+SEQ2 Cy5

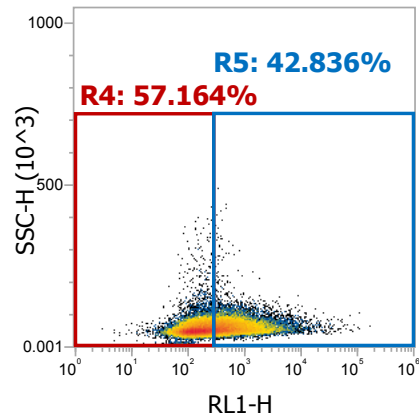

Experiment: **20210923**  
Sample: **6. NT Cells+SEQ2 Cy5**  
Time Recorded: **13:05:09**

| Name         | Gate       | X Parameter | Y Parameter | Count  | %Total  | %Gated  |
|--------------|------------|-------------|-------------|--------|---------|---------|
| △ All Events | All Events | N/A         | N/A         | 56,800 | 100.000 | 100.000 |
| △ R1         | R1         | FSC - FSC-H | SSC - SSC-A | 51,780 | 91.162  | 91.162  |
| △ R2         | R2         | FSC - FSC-A | FSC - FSC-H | 48,903 | 86.097  | 94.444  |
| △ R3         | R3         | VL1 - VL1-H |             | 47,441 | 83.523  | 97.010  |
| R4           | R4         | RL1 - RL1-H | SSC - SSC-H | 27,119 | 47.745  | 57.164  |
| R5           | R5         | RL1 - RL1-H | SSC - SSC-H | 20,322 | 35.778  | 42.836  |
