# Supplementary material for: A retrotransposon-derived DNA zip code internalizes myeloma cells through Clathrin-Rab5a-mediated endocytosis
Source: Frontiers journal article supplement (doi:10.3389/fonc.2024.1288724), 2024-02-23
Supplement: Data_Sheet_1.ZIP [file Data_Sheet_1.ZIP]

All Events - 1. NT Cells+SEQ2 Cy5

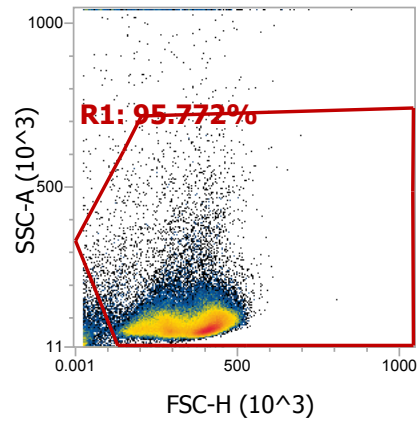

R1 - 1. NT Cells+SEQ2 Cy5

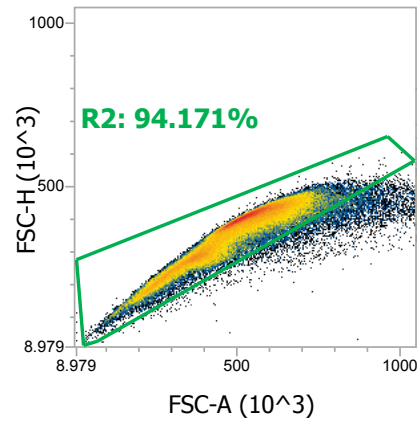

R2 - 1. NT Cells+SEQ2 Cy5

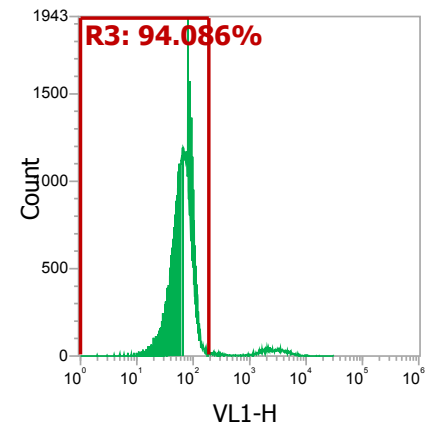

R3 - 1. NT Cells+SEQ2 Cy5

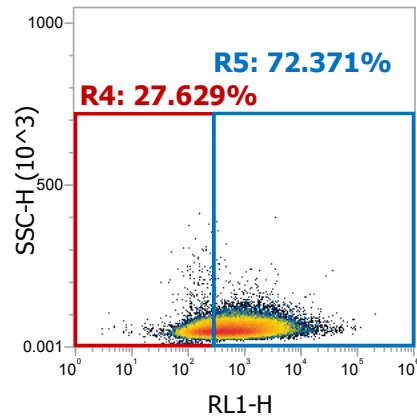

Experiment: **20210901**  
Sample: **1. NT Cells+SEQ2 Cy5**  
Time Recorded: **20:28:29**

| Name         | Gate       | X Parameter | Y Parameter | Count  | %Total  | %Gated  |
|--------------|------------|-------------|-------------|--------|---------|---------|
| ▢ All Events | All Events | N/A         | N/A         | 82,757 | 100.000 | 100.000 |
| ▢ R1         | R1         | FSC - FSC-H | SSC - SSC-A | 79,258 | 95.772  | 95.772  |
| ▢ R2         | R2         | FSC - FSC-A | FSC - FSC-H | 74,638 | 90.189  | 94.171  |
| ▢ R3         | R3         | VL1 - VL1-H |             | 70,224 | 84.856  | 94.086  |
| ▢ R4         | R4         | RL1 - RL1-H | SSC - SSC-H | 19,402 | 23.445  | 27.629  |
| ▢ R5         | R5         | RL1 - RL1-H | SSC - SSC-H | 50,822 | 61.411  | 72.371  |

All Events - 2. NT Cells+SEQ2 Cy5

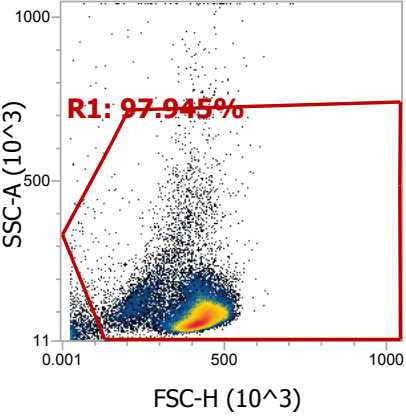

R1 - 2. NT Cells+SEQ2 Cy5

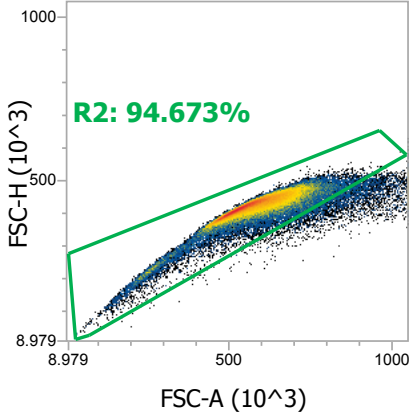

R2 - 2. NT Cells+SEQ2 Cy5

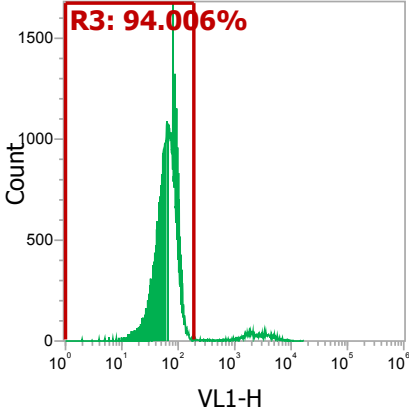

R3 - 2. NT Cells+SEQ2 Cy5

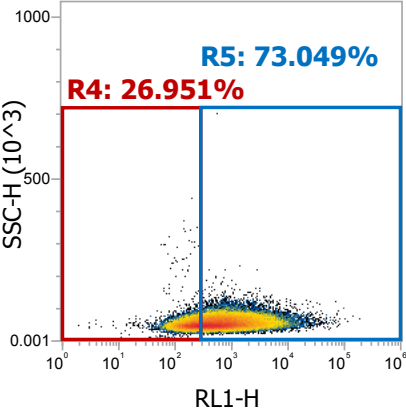

Experiment: **20210908**  
Sample: **2. NT Cells+SEQ2 Cy5**  
Time Recorded: **21:35:34**

| Name       | Gate       | X Parameter | Y Parameter | Count  | %Total  | %Gated  |
|------------|------------|-------------|-------------|--------|---------|---------|
| All Events | All Events | N/A         | N/A         | 70,911 | 100.000 | 100.000 |
| R1         | R1         | FSC - FSC-H | SSC - SSC-A | 69,454 | 97.945  | 97.945  |
| R2         | R2         | FSC - FSC-A | FSC - FSC-H | 65,754 | 92.728  | 94.673  |
| R3         | R3         | VL1 - VL1-H |             | 61,813 | 87.170  | 94.006  |
| R4         | R4         | RL1 - RL1-H | SSC - SSC-H | 16,659 | 23.493  | 26.951  |
| R5         | R5         | RL1 - RL1-H | SSC - SSC-H | 45,154 | 63.677  | 73.049  |

All Events - 3. NT Cells+SEQ2 Cy5

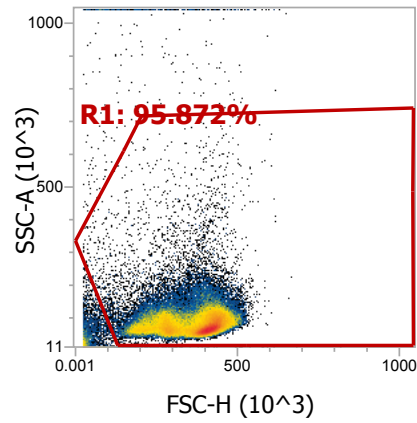

R1 - 3. NT Cells+SEQ2 Cy5

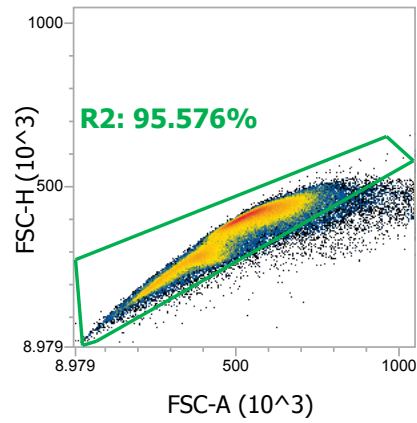

R2 - 3. NT Cells+SEQ2 Cy5

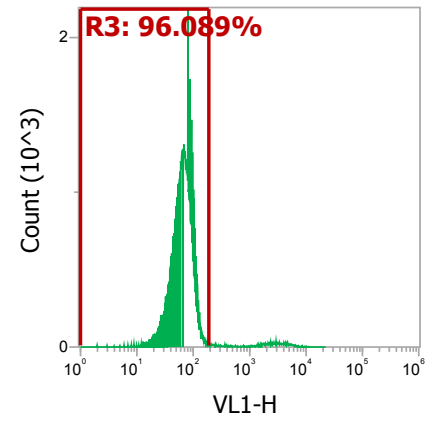

R3 - 3. NT Cells+SEQ2 Cy5

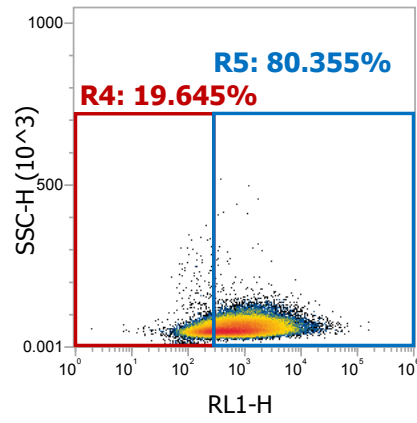

Experiment: **20210917**  
Sample: **3. NT Cells+SEQ2 Cy5**  
Time Recorded: **19:20:40**

| Name         | Gate       | X Parameter | Y Parameter | Count  | %Total  | %Gated  |
|--------------|------------|-------------|-------------|--------|---------|---------|
| △ All Events | All Events | N/A         | N/A         | 85,165 | 100.000 | 100.000 |
| △ R1         | R1         | FSC - FSC-H | SSC - SSC-A | 81,649 | 95.872  | 95.872  |
| △ R2         | R2         | FSC - FSC-A | FSC - FSC-H | 78,037 | 91.630  | 95.576  |
| △ R3         | R3         | VL1 - VL1-H |             | 74,985 | 88.047  | 96.089  |
| R4           | R4         | RL1 - RL1-H | SSC - SSC-H | 14,731 | 17.297  | 19.645  |
| R5           | R5         | RL1 - RL1-H | SSC - SSC-H | 60,254 | 70.750  | 80.355  |
