# Supplementary material for: A retrotransposon-derived DNA zip code internalizes myeloma cells through Clathrin-Rab5a-mediated endocytosis
Source: Frontiers journal article supplement (doi:10.3389/fonc.2024.1288724), 2024-02-23
Supplement: Data_Sheet_1.ZIP [file Data_Sheet_1.ZIP]

All Events - 2. NT Cells+SEQ2 Cy5

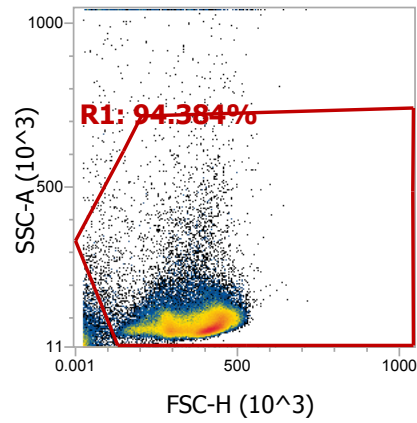

R1 - 2. NT Cells+SEQ2 Cy5

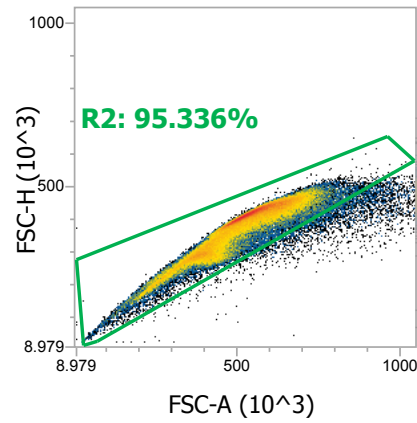

R2 - 2. NT Cells+SEQ2 Cy5

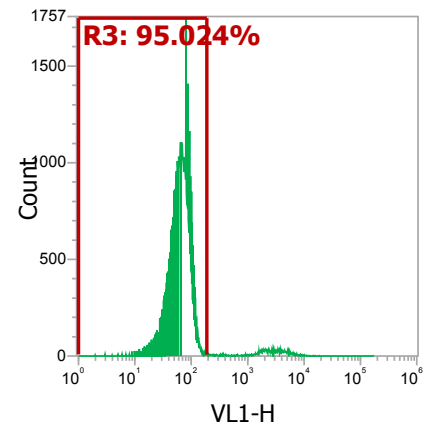

R3 - 2. NT Cells+SEQ2 Cy5

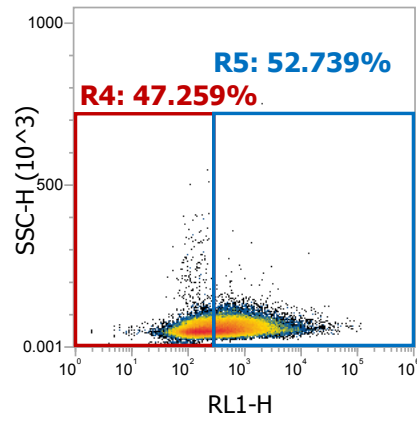

Experiment: **20210901**  
Sample: **2. NT Cells+SEQ2 Cy5**  
Time Recorded: **12:28:10**

| Name         | Gate       | X Parameter | Y Parameter | Count  | %Total  | %Gated  |
|--------------|------------|-------------|-------------|--------|---------|---------|
| ▢ All Events | All Events | N/A         | N/A         | 73,739 | 100.000 | 100.000 |
| ▢ R1         | R1         | FSC - FSC-H | SSC - SSC-A | 69,598 | 94.384  | 94.384  |
| ▢ R2         | R2         | FSC - FSC-A | FSC - FSC-H | 66,352 | 89.982  | 95.336  |
| ▢ R3         | R3         | VL1 - VL1-H |             | 63,050 | 85.504  | 95.024  |
| ▢ R4         | R4         | RL1 - RL1-H | SSC - SSC-H | 29,797 | 40.409  | 47.259  |
| ▢ R5         | R5         | RL1 - RL1-H | SSC - SSC-H | 33,252 | 45.094  | 52.739  |

All Events - 3. NT Cells+SEQ2 Cy5

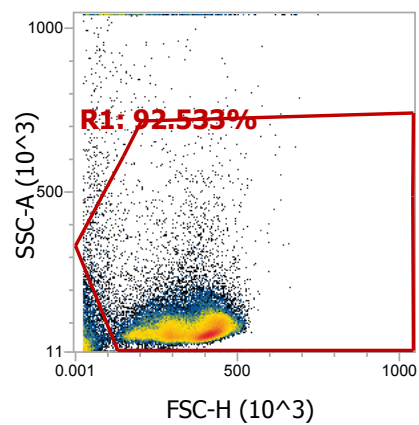

All Events - 3. NT Cells+SEQ2 Cy5

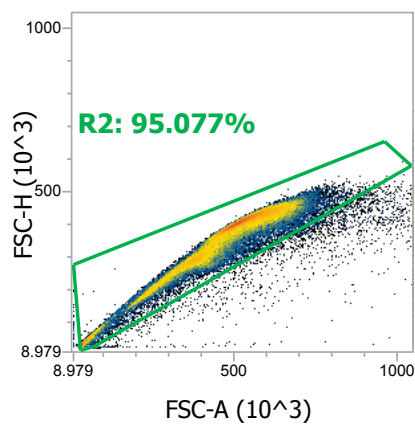

R2 - 3. NT Cells+SEQ2 Cy5

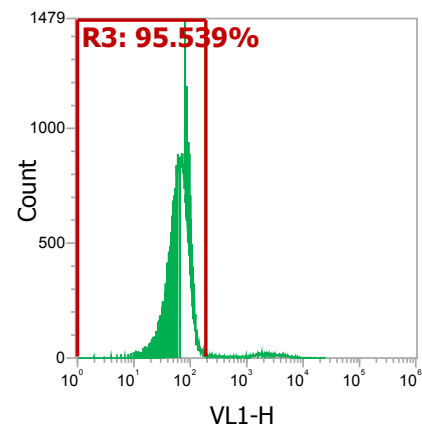

R3 - 3. NT Cells+SEQ2 Cy5

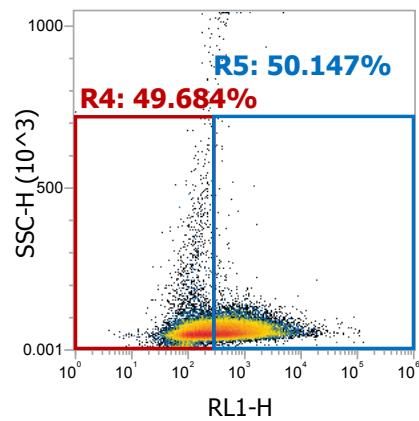

Experiment: **20210903**  
Sample: **3. NT Cells+SEQ2 Cy5**  
Time Recorded: **14:18:45**

| Name         | Gate       | X Parameter | Y Parameter | Count  | %Total  | %Gated  |
|--------------|------------|-------------|-------------|--------|---------|---------|
| ▢ All Events | All Events | N/A         | N/A         | 57,952 | 100.000 | 100.000 |
| ▢ R1         | R1         | FSC - FSC-H | SSC - SSC-A | 53,625 | 92.533  | 92.533  |
| ▢ R2         | R2         | FSC - FSC-A | FSC - FSC-H | 55,099 | 95.077  | 95.077  |
| ▢ R3         | R3         | VL1 - VL1-H |             | 52,641 | 90.836  | 95.539  |
| ▢ R4         | R4         | RL1 - RL1-H | SSC - SSC-H | 26,154 | 45.130  | 49.684  |
| ▢ R5         | R5         | RL1 - RL1-H | SSC - SSC-H | 26,398 | 45.551  | 50.147  |

All Events - 4. NT Cells+SEQ2 Cy5

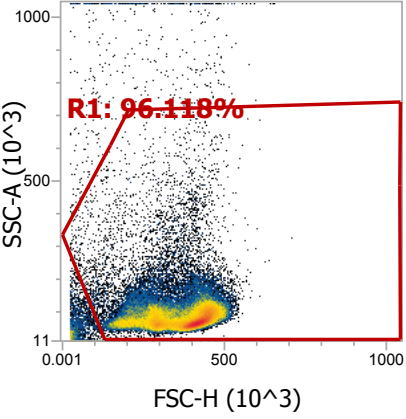

R1 - 4. NT Cells+SEQ2 Cy5

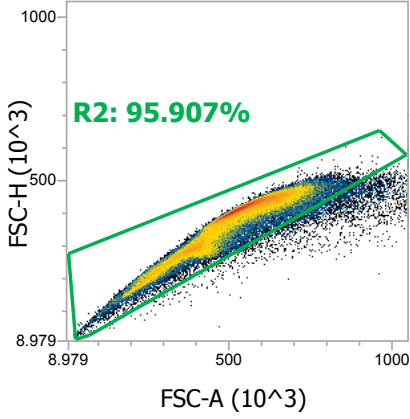

R2 - 4. NT Cells+SEQ2 Cy5

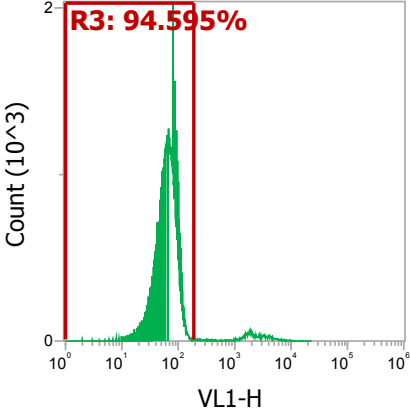

R3 - 4. NT Cells+SEQ2 Cy5

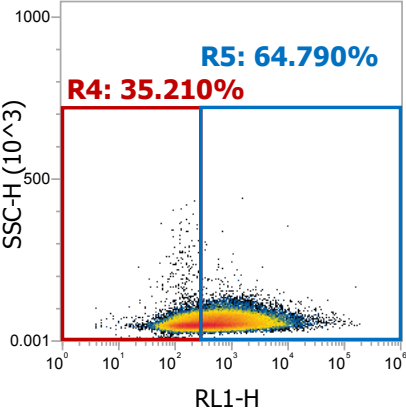

Experiment: **20210908**  
Sample: **4. NT Cells+SEQ2 Cy5**  
Time Recorded: **13:45:09**

| Name         | Gate       | X Parameter | Y Parameter | Count  | %Total  | %Gated  |
|--------------|------------|-------------|-------------|--------|---------|---------|
| △ All Events | All Events | N/A         | N/A         | 81,945 | 100.000 | 100.000 |
| △ R1         | R1         | FSC - FSC-H | SSC - SSC-A | 78,764 | 96.118  | 96.118  |
| △ R2         | R2         | FSC - FSC-A | FSC - FSC-H | 75,540 | 92.184  | 95.907  |
| △ R3         | R3         | VL1 - VL1-H |             | 71,457 | 87.201  | 94.595  |
| R4           | R4         | RL1 - RL1-H | SSC - SSC-H | 25,160 | 30.704  | 35.210  |
| R5           | R5         | RL1 - RL1-H | SSC - SSC-H | 46,297 | 56.498  | 64.790  |

All Events - 5. NT Cells+SEQ2 Cy5

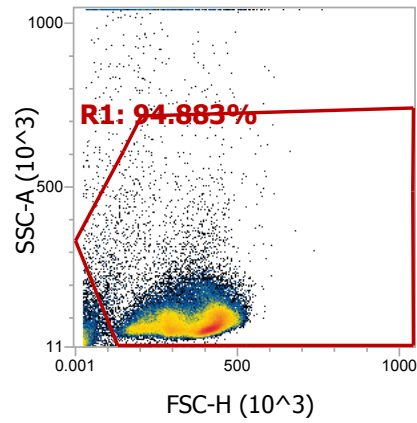

R1 - 5. NT Cells+SEQ2 Cy5

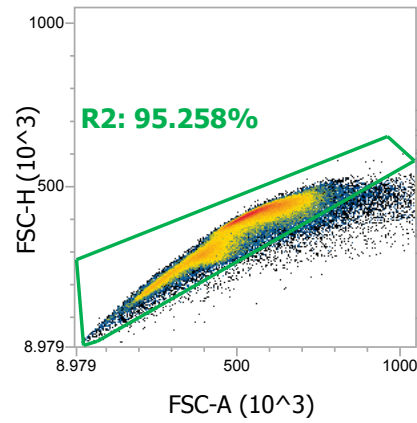

R2 - 5. NT Cells+SEQ2 Cy5

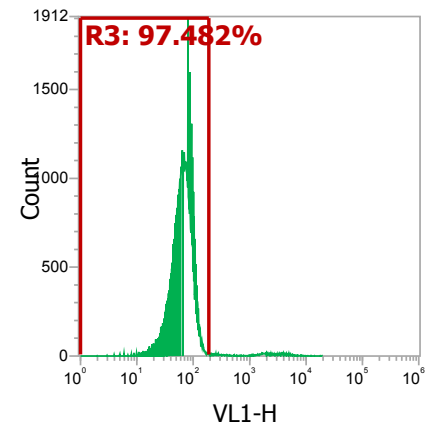

R3 - 5. NT Cells+SEQ2 Cy5

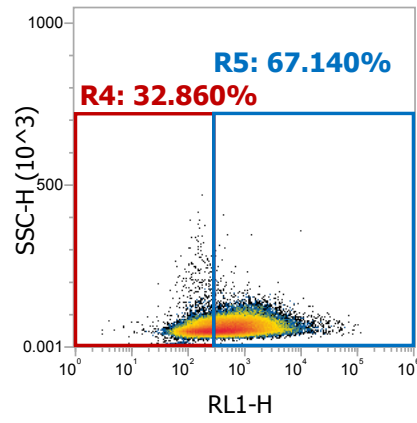

Experiment: **20210917**  
Sample: **5. NT Cells+SEQ2 Cy5**  
Time Recorded: **11:24:40**

| Name         | Gate       | X Parameter | Y Parameter | Count  | %Total  | %Gated  |
|--------------|------------|-------------|-------------|--------|---------|---------|
| △ All Events | All Events | N/A         | N/A         | 74,791 | 100.000 | 100.000 |
| △ R1         | R1         | FSC - FSC-H | SSC - SSC-A | 70,964 | 94.883  | 94.883  |
| △ R2         | R2         | FSC - FSC-A | FSC - FSC-H | 67,599 | 90.384  | 95.258  |
| △ R3         | R3         | VL1 - VL1-H |             | 65,897 | 88.108  | 97.482  |
| R4           | R4         | RL1 - RL1-H | SSC - SSC-H | 21,654 | 28.953  | 32.860  |
| R5           | R5         | RL1 - RL1-H | SSC - SSC-H | 44,243 | 59.156  | 67.140  |

All Events - 6. NT Cells+SEQ2 Cy5

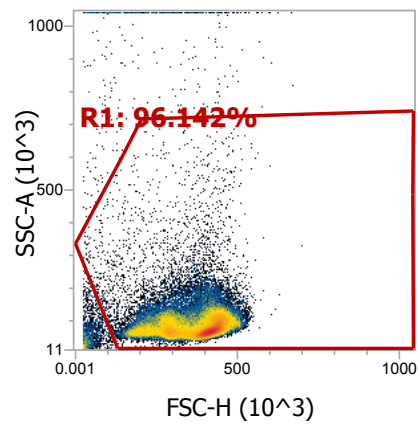

R1 - 6. NT Cells+SEQ2 Cy5

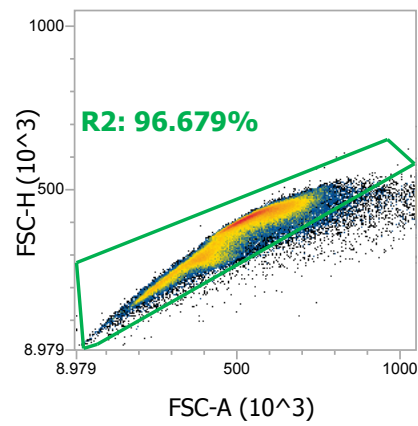

R2 - 6. NT Cells+SEQ2 Cy5

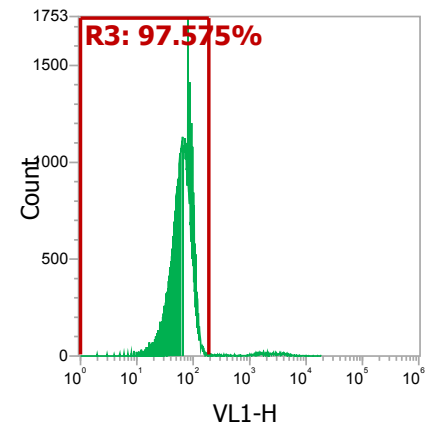

R3 - 6. NT Cells+SEQ2 Cy5

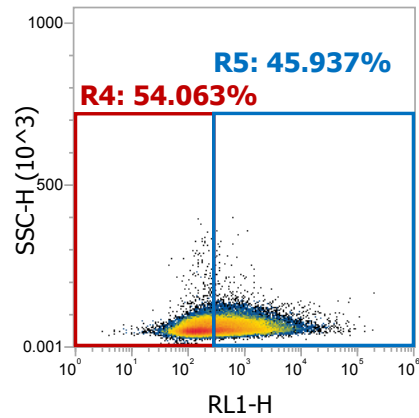

Experiment: **20210924**  
Sample: **6. NT Cells+SEQ2 Cy5**  
Time Recorded: **13:41:47**

| Name         | Gate       | X Parameter | Y Parameter | Count  | %Total  | %Gated  |
|--------------|------------|-------------|-------------|--------|---------|---------|
| ▢ All Events | All Events | N/A         | N/A         | 71,039 | 100.000 | 100.000 |
| ▢ R1         | R1         | FSC - FSC-H | SSC - SSC-A | 68,298 | 96.142  | 96.142  |
| ▢ R2         | R2         | FSC - FSC-A | FSC - FSC-H | 66,030 | 92.949  | 96.679  |
| ▢ R3         | R3         | VL1 - VL1-H |             | 64,429 | 90.695  | 97.575  |
| ▢ R4         | R4         | RL1 - RL1-H | SSC - SSC-H | 34,832 | 49.032  | 54.063  |
| ▢ R5         | R5         | RL1 - RL1-H | SSC - SSC-H | 29,597 | 41.663  | 45.937  |
