# Supplementary material for: A retrotransposon-derived DNA zip code internalizes myeloma cells through Clathrin-Rab5a-mediated endocytosis
Source: Frontiers journal article supplement (doi:10.3389/fonc.2024.1288724), 2024-02-23
Supplement: Data_Sheet_1.ZIP [file Data_Sheet_1.ZIP]

All Events - 1. Trypsin Cells+SEQ2 Cy5

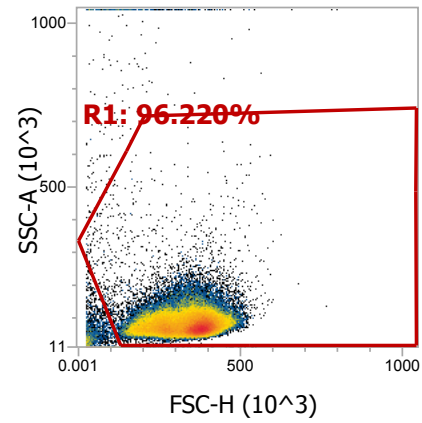

R1 - 1. Trypsin Cells+SEQ2 Cy5

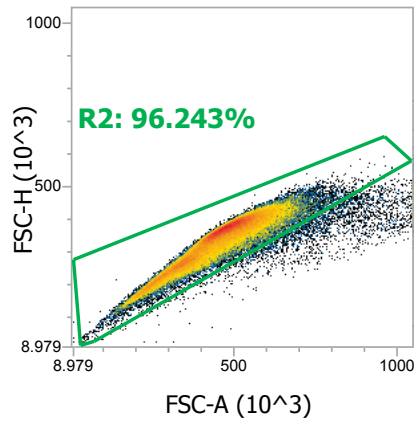

R2 - 1. Trypsin Cells+SEQ2 Cy5

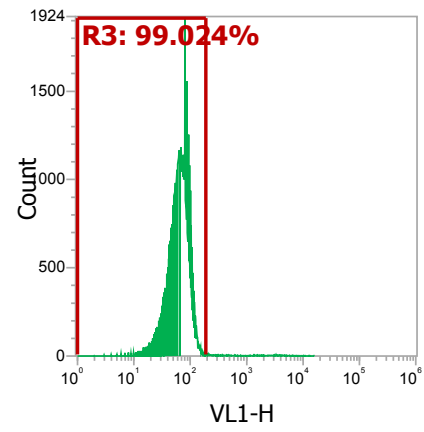

R3 - 1. Trypsin Cells+SEQ2 Cy5

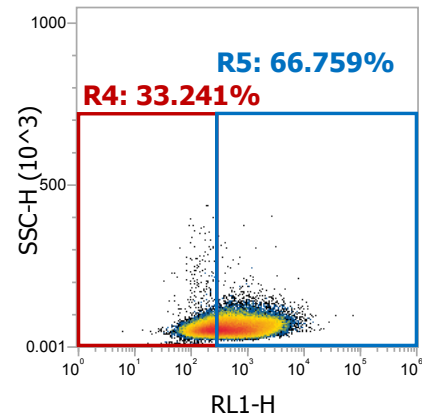

Experiment: **20210901**  
Sample: **1. Trypsin Cells+SEQ2 Cy5**  
Time Recorded: **20:26:57**

| Name         | Gate       | X Parameter | Y Parameter | Count  | %Total  | %Gated  |
|--------------|------------|-------------|-------------|--------|---------|---------|
| △ All Events | All Events | N/A         | N/A         | 72,889 | 100.000 | 100.000 |
| △ R1         | R1         | FSC - FSC-H | SSC - SSC-A | 70,134 | 96.220  | 96.220  |
| △ R2         | R2         | FSC - FSC-A | FSC - FSC-H | 67,499 | 92.605  | 96.243  |
| △ R3         | R3         | VL1 - VL1-H |             | 66,840 | 91.701  | 99.024  |
| R4           | R4         | RL1 - RL1-H | SSC - SSC-H | 22,218 | 30.482  | 33.241  |
| R5           | R5         | RL1 - RL1-H | SSC - SSC-H | 44,622 | 61.219  | 66.759  |

All Events - 2. Trypsin Cells+SEQ2 Cy5

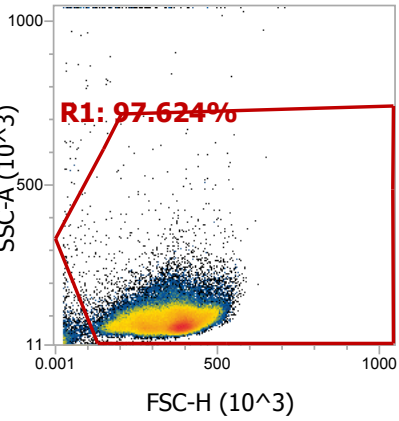

R1 - 2. Trypsin Cells+SEQ2 Cy5

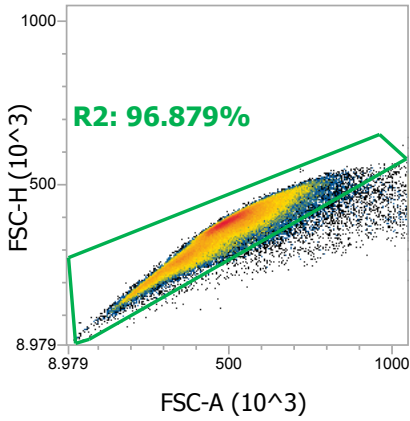

R2 - 2. Trypsin Cells+SEQ2 Cy5

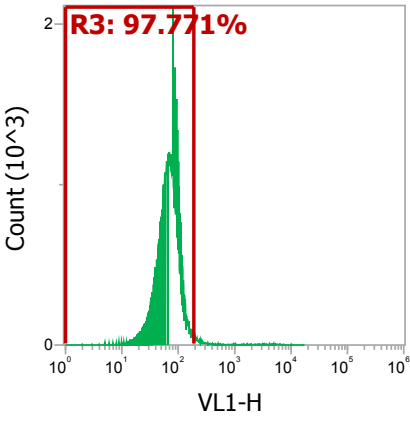

R3 - 2. Trypsin Cells+SEQ2 Cy5

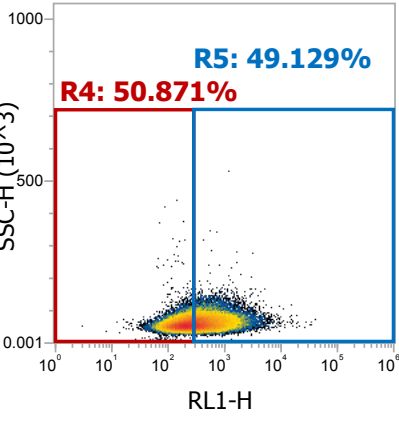

Experiment: **20210908**  
Sample: **2. Trypsin Cells+SEQ2 Cy5**  
Time Recorded: **21:34:00**

| Name         | Gate       | X Parameter | Y Parameter | Count  | %Total  | %Gated  |
|--------------|------------|-------------|-------------|--------|---------|---------|
| △ All Events | All Events | N/A         | N/A         | 80,772 | 100.000 | 100.000 |
| △ R1         | R1         | FSC - FSC-H | SSC - SSC-A | 78,853 | 97.624  | 97.624  |
| △ R2         | R2         | FSC - FSC-A | FSC - FSC-H | 76,392 | 94.577  | 96.879  |
| △ R3         | R3         | VL1 - VL1-H |             | 74,689 | 92.469  | 97.771  |
| R4           | R4         | RL1 - RL1-H | SSC - SSC-H | 37,995 | 47.040  | 50.871  |
| R5           | R5         | RL1 - RL1-H | SSC - SSC-H | 36,694 | 45.429  | 49.129  |

All Events - 3. Trypsin Cells+SEQ2 Cy5

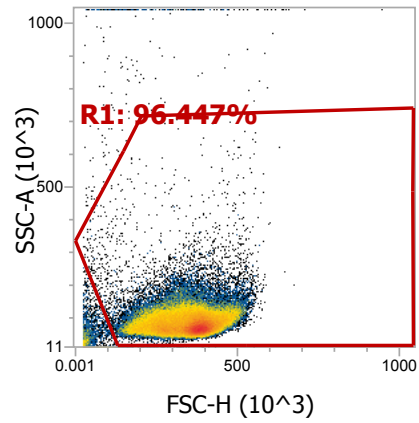

R1 - 3. Trypsin Cells+SEQ2 Cy5

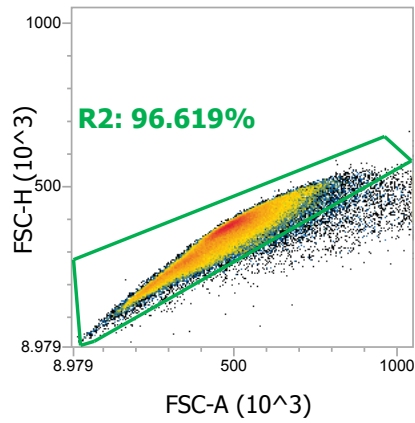

R2 - 3. Trypsin Cells+SEQ2 Cy5

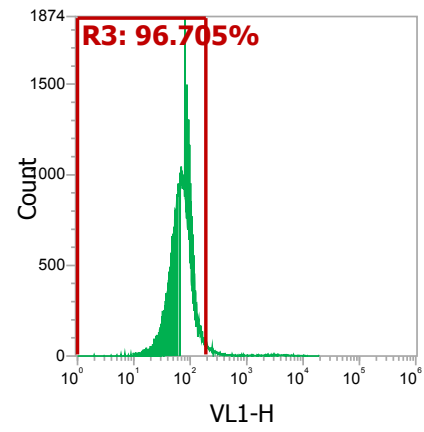

R3 - 3. Trypsin Cells+SEQ2 Cy5

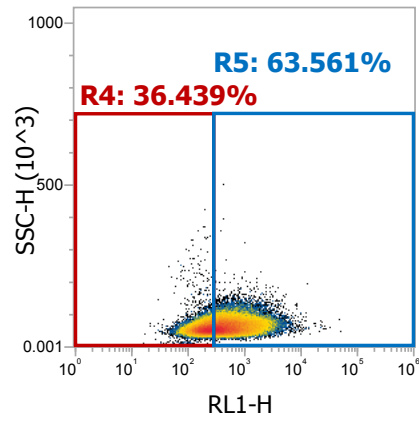

Experiment: **20210917**  
Sample: **3. Trypsin Cells+SEQ2 Cy5**  
Time Recorded: **19:18:24**

| Name         | Gate       | X Parameter | Y Parameter | Count  | %Total  | %Gated  |
|--------------|------------|-------------|-------------|--------|---------|---------|
| △ All Events | All Events | N/A         | N/A         | 71,689 | 100.000 | 100.000 |
| △ R1         | R1         | FSC - FSC-H | SSC - SSC-A | 69,142 | 96.447  | 96.447  |
| △ R2         | R2         | FSC - FSC-A | FSC - FSC-H | 66,804 | 93.186  | 96.619  |
| △ R3         | R3         | VL1 - VL1-H |             | 64,603 | 90.116  | 96.705  |
| R4           | R4         | RL1 - RL1-H | SSC - SSC-H | 23,541 | 32.838  | 36.439  |
| R5           | R5         | RL1 - RL1-H | SSC - SSC-H | 41,062 | 57.278  | 63.561  |
