# Supplementary material for: A retrotransposon-derived DNA zip code internalizes myeloma cells through Clathrin-Rab5a-mediated endocytosis
Source: Frontiers journal article supplement (doi:10.3389/fonc.2024.1288724), 2024-02-23
Supplement: Data_Sheet_1.ZIP [file Data_Sheet_1.ZIP]

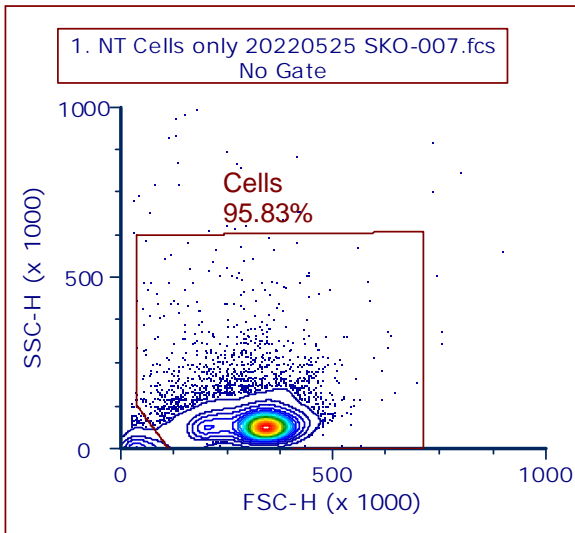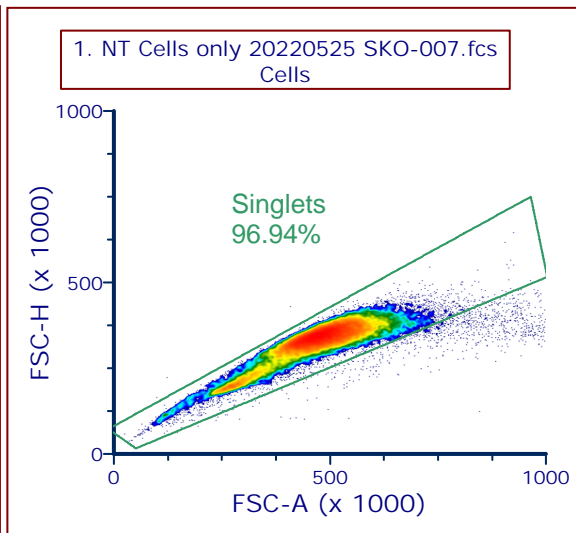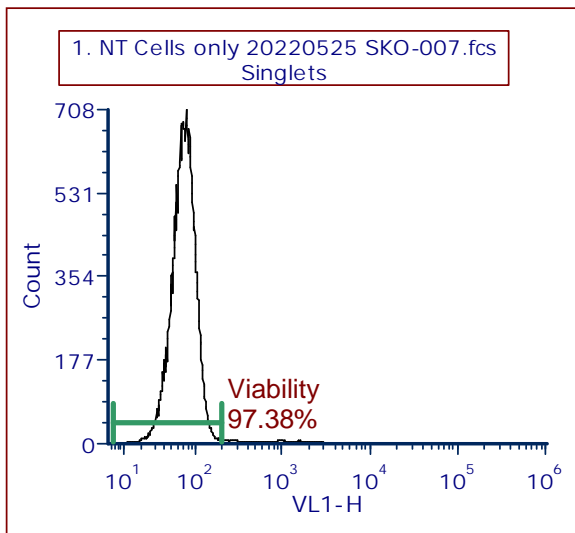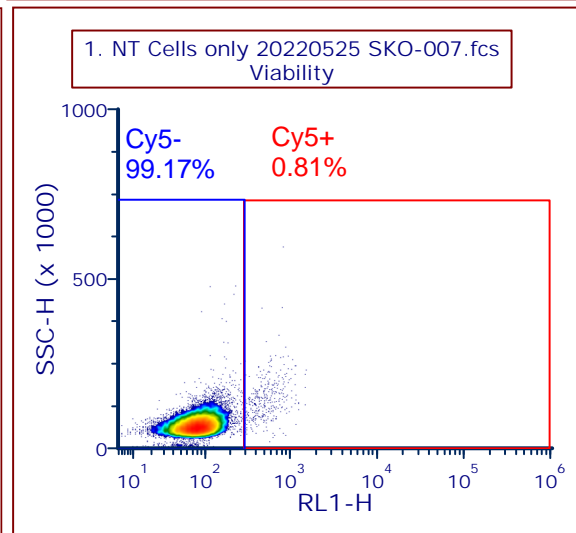

|    | A              | B          | C           | D              | E                | F |
|----|----------------|------------|-------------|----------------|------------------|---|
| 1  | Filename       | Gate       | # of Events | % of all cells | % of gated cells |   |
| 2  | 1. NT Cells or | All Events | 48791       | 100            | 100              |   |
| 3  | 1. NT Cells or | Cells      | 46755       | 95.83          | 95.83            |   |
| 4  | 1. NT Cells or | Singlets   | 45323       | 92.89          | 96.94            |   |
| 5  | 1. NT Cells or | Viability  | 44134       | 90.46          | 97.38            |   |
| 6  | 1. NT Cells or | Cy5+       | 357         | 0.73           | 0.81             |   |
| 7  | 1. NT Cells or | Cy5-       | 43769       | 89.71          | 99.17            |   |
| 8  |                |            |             |                |                  |   |
| 9  |                |            |             |                |                  |   |
| 10 |                |            |             |                |                  |   |

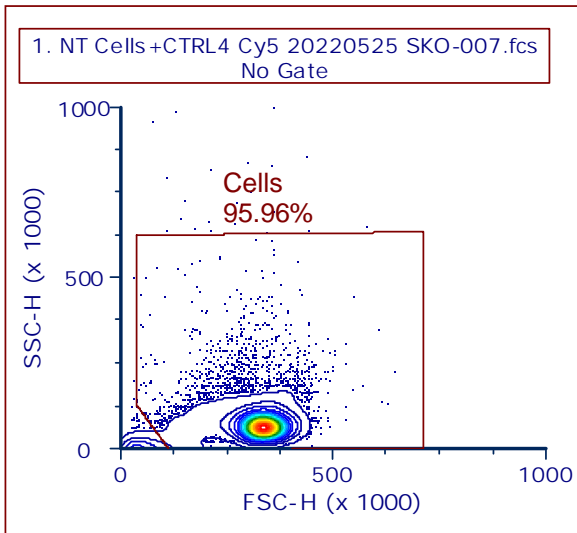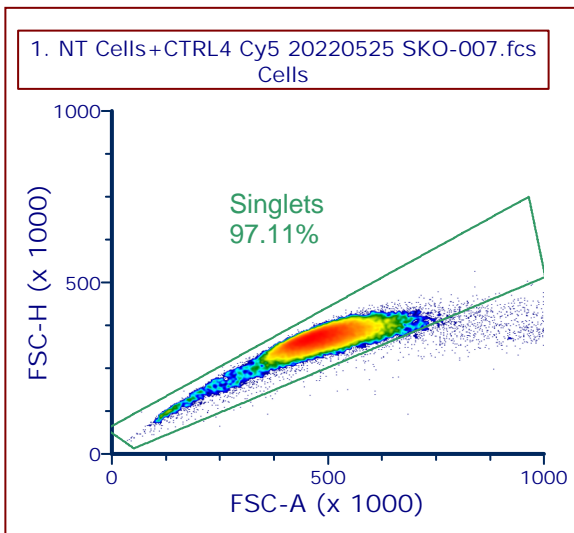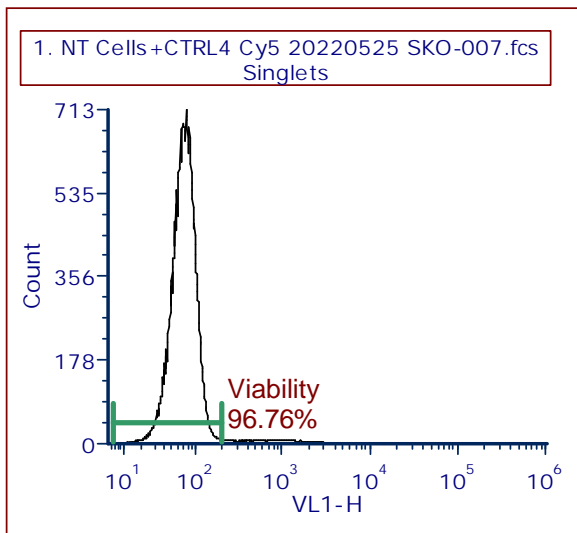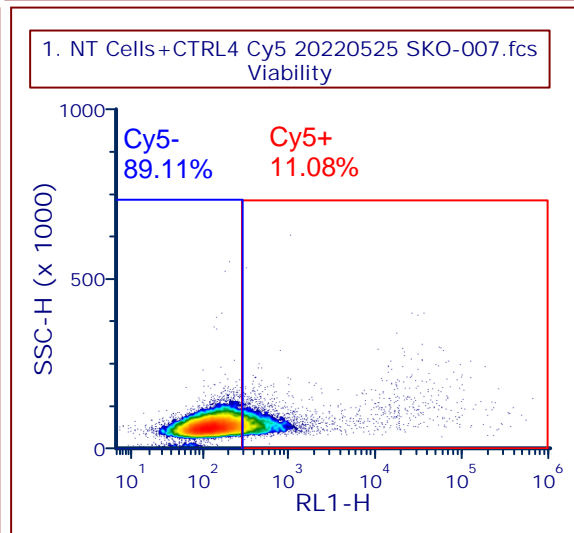

|    | A             | B          | C           | D              | E                | F |  |
|----|---------------|------------|-------------|----------------|------------------|---|--|
| 1  | Filename      | Gate       | # of Events | % of all cells | % of gated cells |   |  |
| 2  | 1. NT Cells+C | All Events | 48917       | 100            | 100              |   |  |
| 3  | 1. NT Cells+C | Cells      | 46941       | 95.96          | 95.96            |   |  |
| 4  | 1. NT Cells+C | Singlets   | 45583       | 93.18          | 97.11            |   |  |
| 5  | 1. NT Cells+C | Viability  | 44107       | 90.17          | 96.76            |   |  |
| 6  | 1. NT Cells+C | Cy5+       | 4885        | 9.99           | 11.08            |   |  |
| 7  | 1. NT Cells+C | Cy5-       | 39302       | 80.34          | 89.11            |   |  |
| 8  |               |            |             |                |                  |   |  |
| 9  |               |            |             |                |                  |   |  |
| 10 |               |            |             |                |                  |   |  |

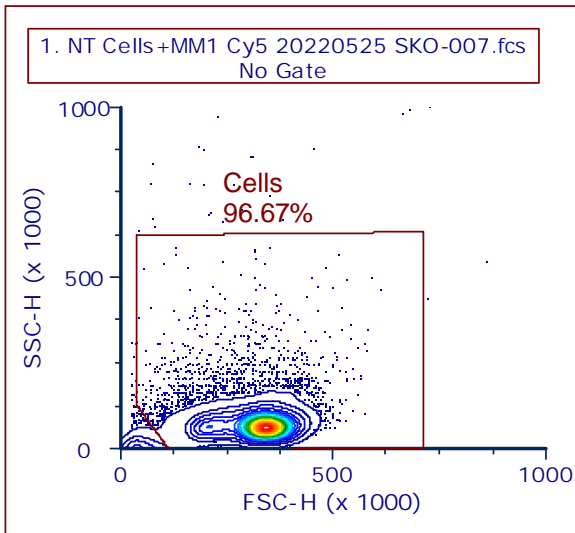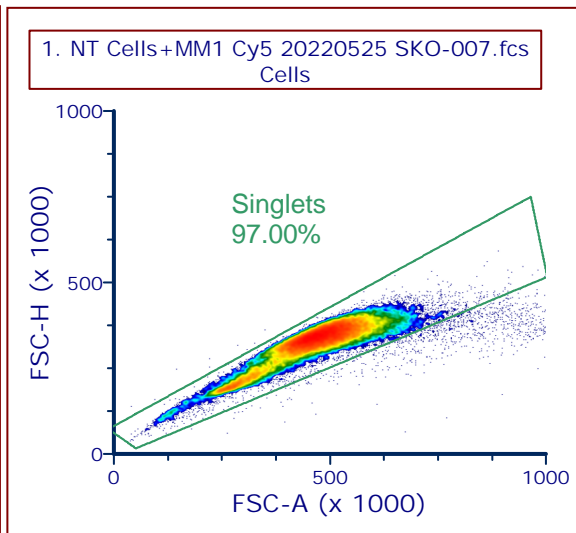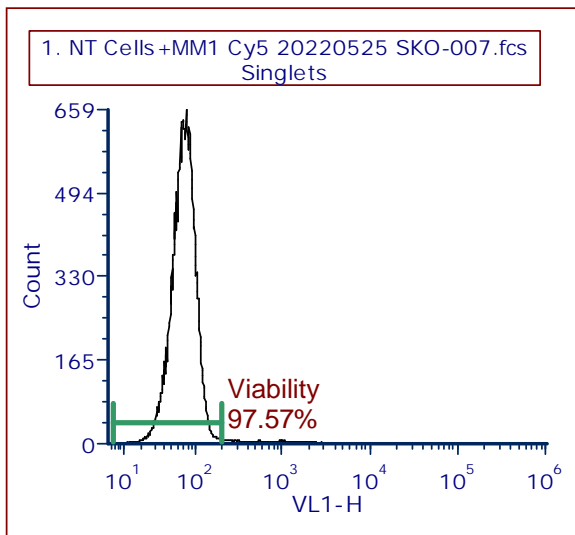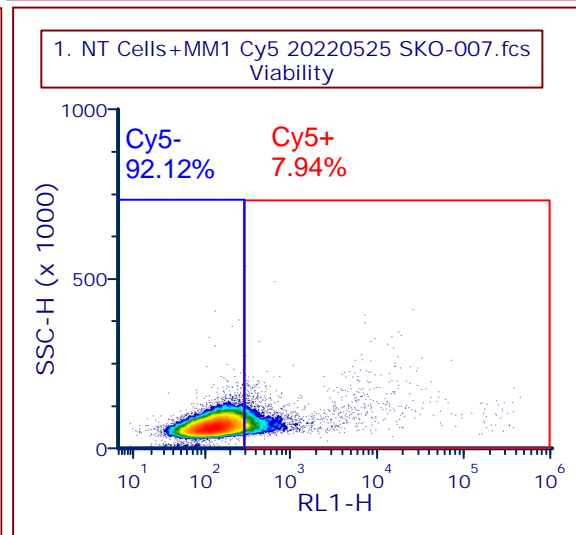

|    | A             | B          | C           | D              | E                | F |  |
|----|---------------|------------|-------------|----------------|------------------|---|--|
| 1  | Filename      | Gate       | # of Events | % of all cells | % of gated cells |   |  |
| 2  | 1. NT Cells+M | All Events | 44867       | 100            | 100              |   |  |
| 3  | 1. NT Cells+M | Cells      | 43374       | 96.67          | 96.67            |   |  |
| 4  | 1. NT Cells+M | Singlets   | 42073       | 93.77          | 97               |   |  |
| 5  | 1. NT Cells+M | Viability  | 41049       | 91.49          | 97.57            |   |  |
| 6  | 1. NT Cells+M | Cy5+       | 3260        | 7.27           | 7.94             |   |  |
| 7  | 1. NT Cells+M | Cy5-       | 37814       | 84.28          | 92.12            |   |  |
| 8  |               |            |             |                |                  |   |  |
| 9  |               |            |             |                |                  |   |  |
| 10 |               |            |             |                |                  |   |  |

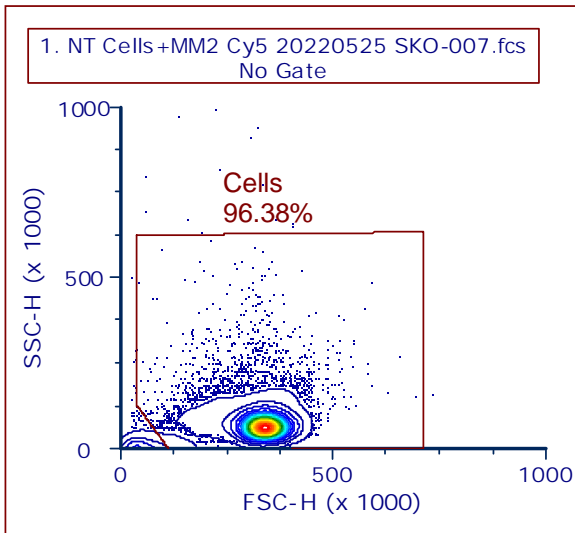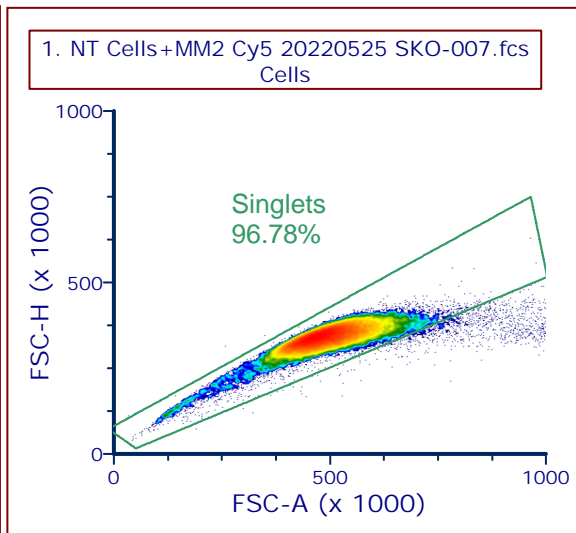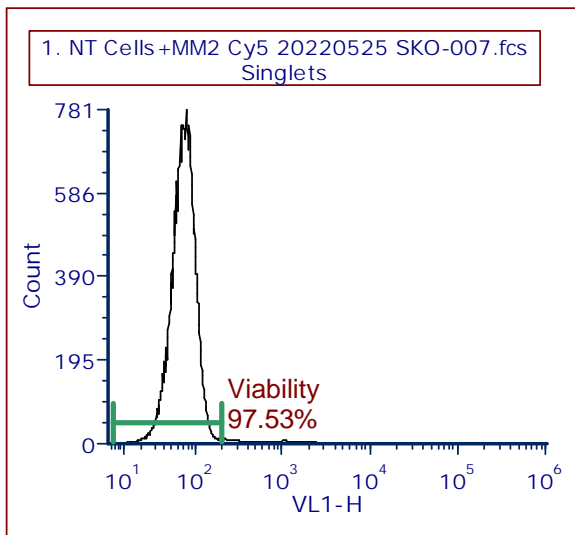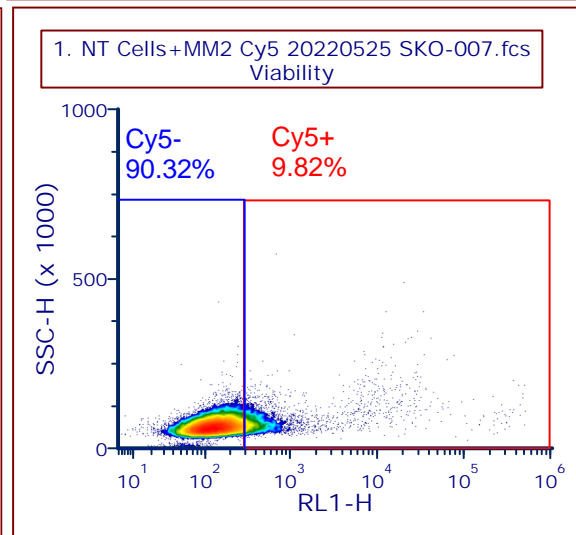

|    | A             | B          | C           | D              | E                | F |  |
|----|---------------|------------|-------------|----------------|------------------|---|--|
| 1  | Filename      | Gate       | # of Events | % of all cells | % of gated cells |   |  |
| 2  | 1. NT Cells+M | All Events | 53472       | 100            | 100              |   |  |
| 3  | 1. NT Cells+M | Cells      | 51536       | 96.38          | 96.38            |   |  |
| 4  | 1. NT Cells+M | Singlets   | 49878       | 93.28          | 96.78            |   |  |
| 5  | 1. NT Cells+M | Viability  | 48645       | 90.97          | 97.53            |   |  |
| 6  | 1. NT Cells+M | Cy5+       | 4777        | 8.93           | 9.82             |   |  |
| 7  | 1. NT Cells+M | Cy5-       | 43938       | 82.17          | 90.32            |   |  |
| 8  |               |            |             |                |                  |   |  |
| 9  |               |            |             |                |                  |   |  |
| 10 |               |            |             |                |                  |   |  |

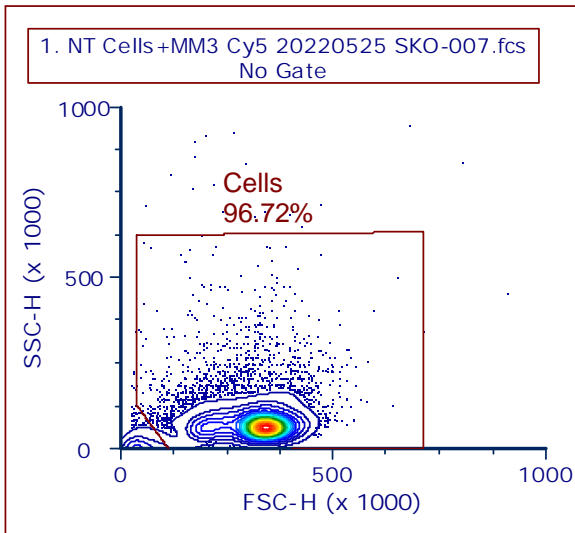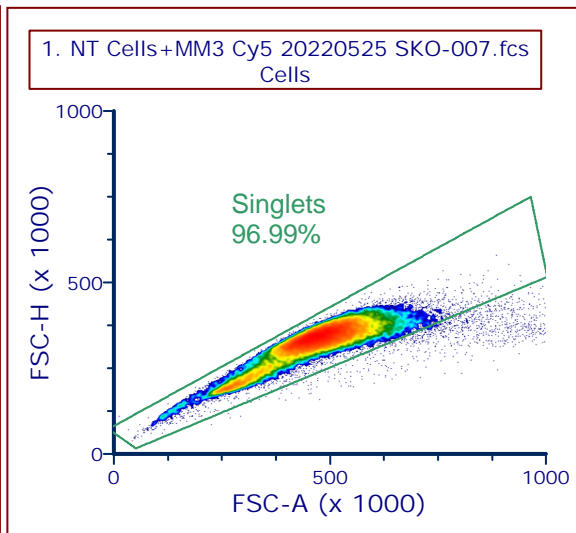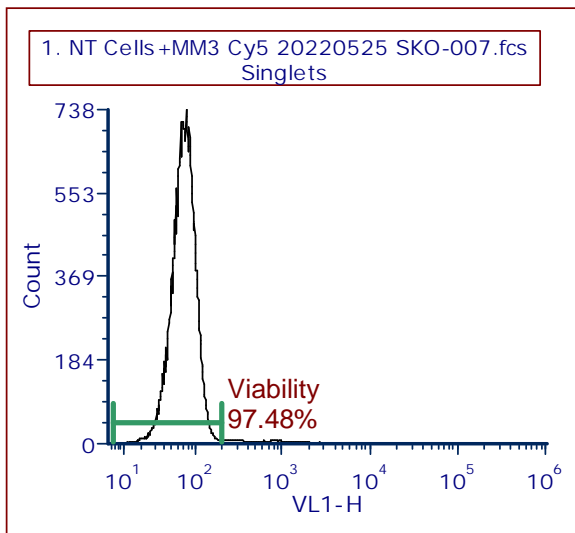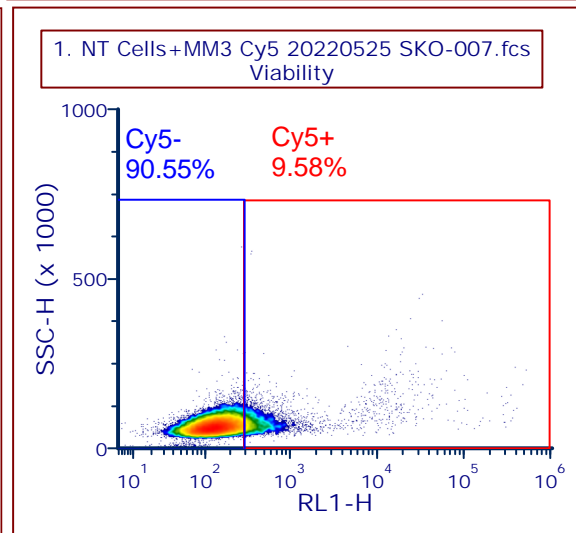

|    | A             | B          | C           | D              | E                | F |  |
|----|---------------|------------|-------------|----------------|------------------|---|--|
| 1  | Filename      | Gate       | # of Events | % of all cells | % of gated cells |   |  |
| 2  | 1. NT Cells+M | All Events | 50259       | 100            | 100              |   |  |
| 3  | 1. NT Cells+M | Cells      | 48612       | 96.72          | 96.72            |   |  |
| 4  | 1. NT Cells+M | Singlets   | 47147       | 93.81          | 96.99            |   |  |
| 5  | 1. NT Cells+M | Viability  | 45959       | 91.44          | 97.48            |   |  |
| 6  | 1. NT Cells+M | Cy5+       | 4404        | 8.76           | 9.58             |   |  |
| 7  | 1. NT Cells+M | Cy5-       | 41615       | 82.8           | 90.55            |   |  |
| 8  |               |            |             |                |                  |   |  |
| 9  |               |            |             |                |                  |   |  |
| 10 |               |            |             |                |                  |   |  |

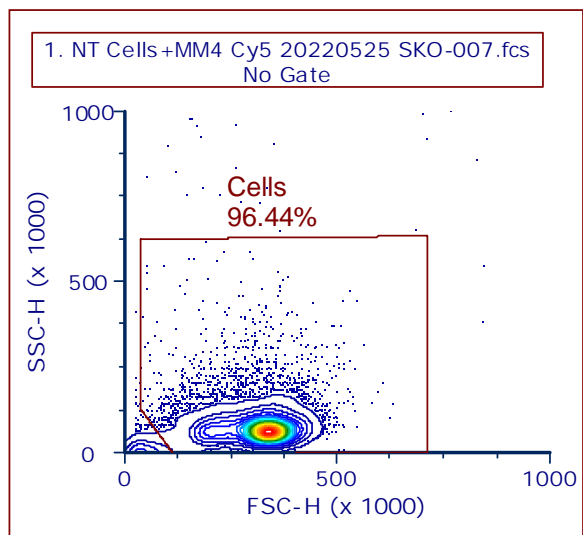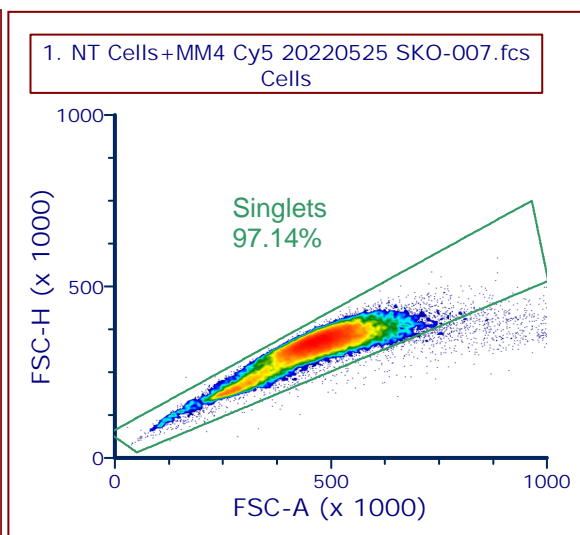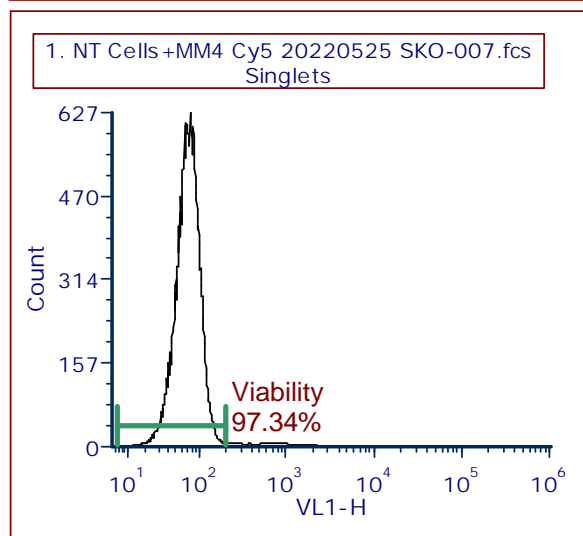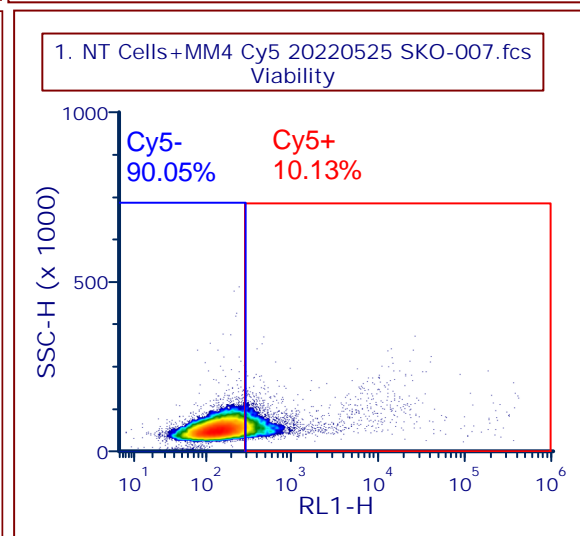

|    | A             | B          | C           | D              | E                | F |  |
|----|---------------|------------|-------------|----------------|------------------|---|--|
| 1  | Filename      | Gate       | # of Events | % of all cells | % of gated cells |   |  |
| 2  | 1. NT Cells+M | All Events | 42943       | 100            | 100              |   |  |
| 3  | 1. NT Cells+M | Cells      | 41413       | 96.44          | 96.44            |   |  |
| 4  | 1. NT Cells+M | Singlets   | 40230       | 93.68          | 97.14            |   |  |
| 5  | 1. NT Cells+M | Viability  | 39159       | 91.19          | 97.34            |   |  |
| 6  | 1. NT Cells+M | Cy5+       | 3967        | 9.24           | 10.13            |   |  |
| 7  | 1. NT Cells+M | Cy5-       | 35264       | 82.12          | 90.05            |   |  |
| 8  |               |            |             |                |                  |   |  |
| 9  |               |            |             |                |                  |   |  |
| 10 |               |            |             |                |                  |   |  |

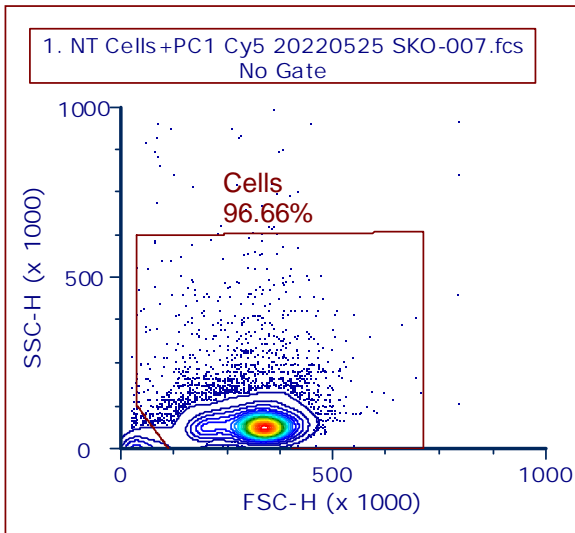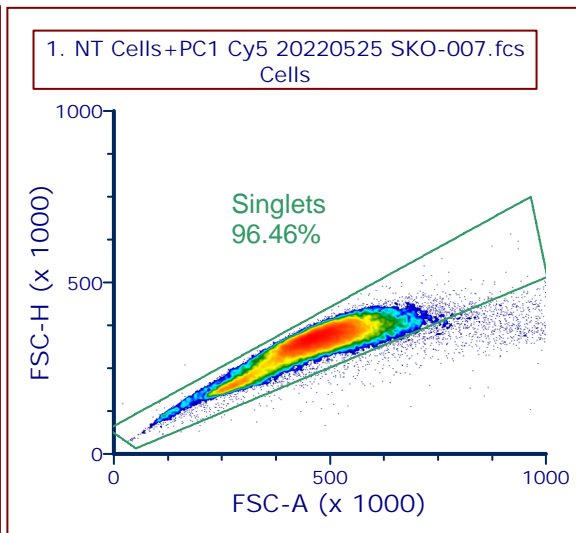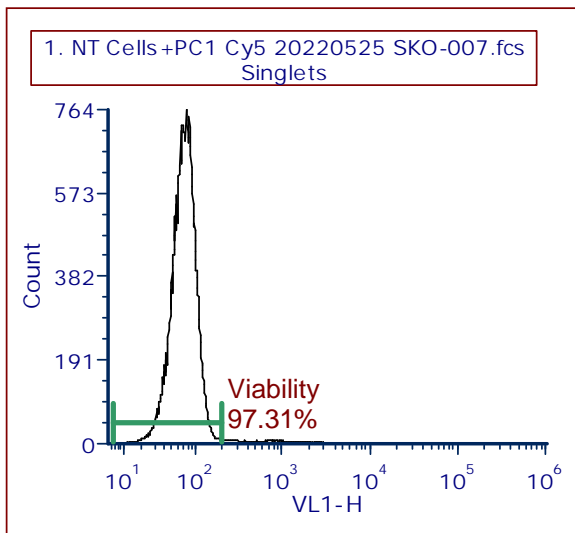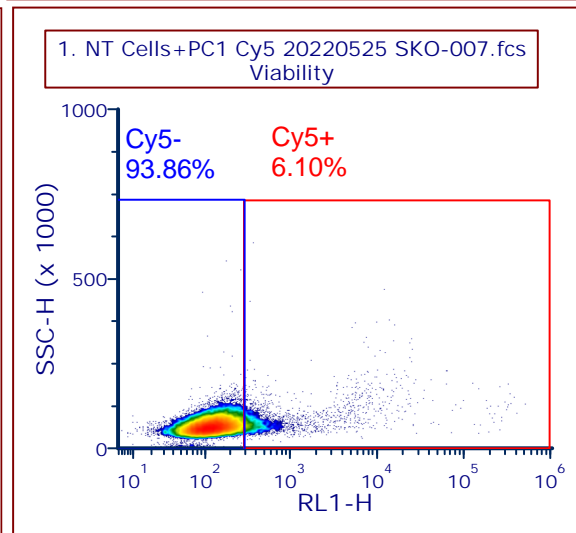

|    | A               | B          | C           | D              | E                | F |  |
|----|-----------------|------------|-------------|----------------|------------------|---|--|
| 1  | Filename        | Gate       | # of Events | % of all cells | % of gated cells |   |  |
| 2  | 1. NT Cells+PC1 | All Events | 52548       | 100            | 100              |   |  |
| 3  | 1. NT Cells+PC1 | Cells      | 50792       | 96.66          | 96.66            |   |  |
| 4  | 1. NT Cells+PC1 | Singlets   | 48994       | 93.24          | 96.46            |   |  |
| 5  | 1. NT Cells+PC1 | Viability  | 47675       | 90.73          | 97.31            |   |  |
| 6  | 1. NT Cells+PC1 | Cy5+       | 2906        | 5.53           | 6.1              |   |  |
| 7  | 1. NT Cells+PC1 | Cy5-       | 44746       | 85.15          | 93.86            |   |  |
| 8  |                 |            |             |                |                  |   |  |
| 9  |                 |            |             |                |                  |   |  |
| 10 |                 |            |             |                |                  |   |  |

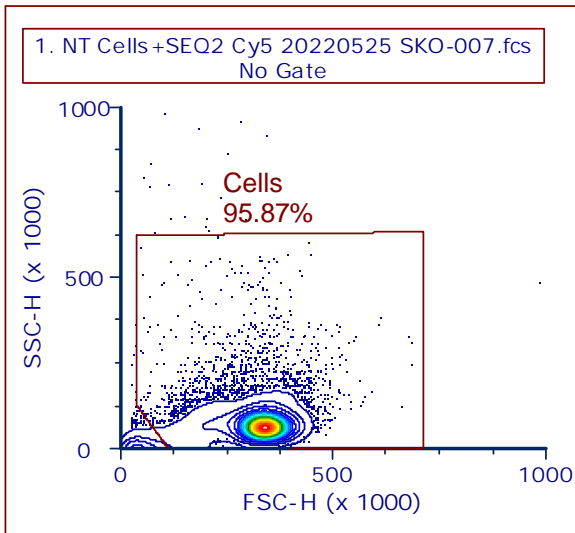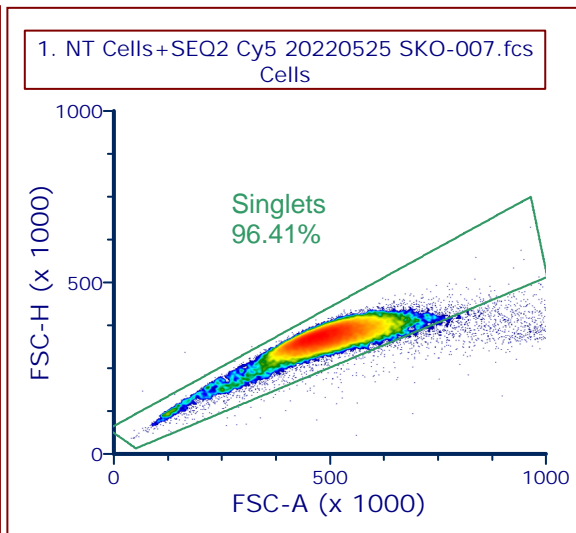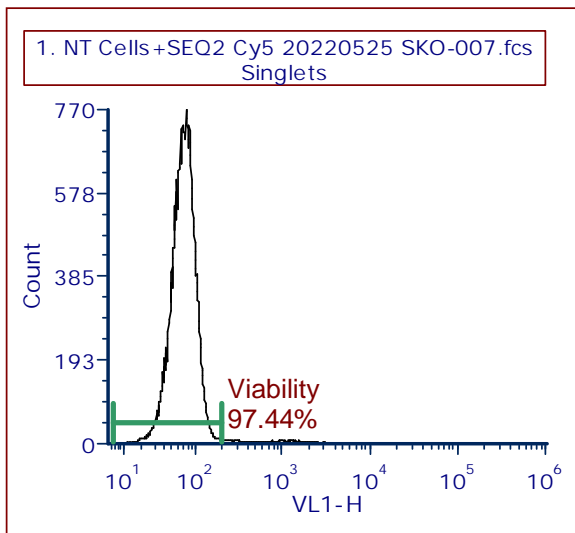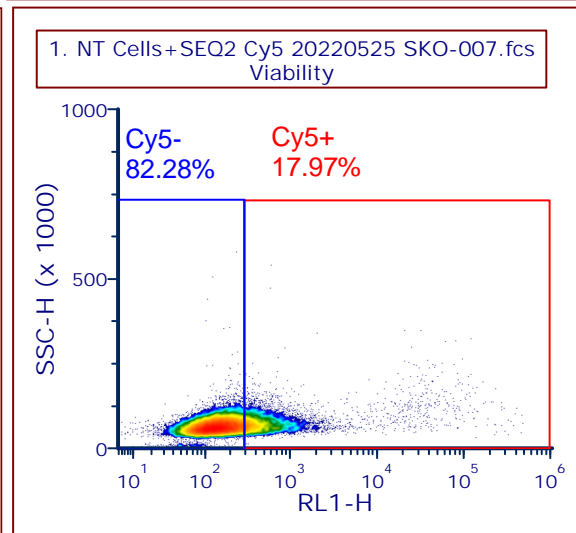

|    | A              | B          | C           | D              | E                | F |  |
|----|----------------|------------|-------------|----------------|------------------|---|--|
| 1  | Filename       | Gate       | # of Events | % of all cells | % of gated cells |   |  |
| 2  | 1. NT Cells+SI | All Events | 53272       | 100            | 100              |   |  |
| 3  | 1. NT Cells+SI | Cells      | 51073       | 95.87          | 95.87            |   |  |
| 4  | 1. NT Cells+SI | Singlets   | 49241       | 92.43          | 96.41            |   |  |
| 5  | 1. NT Cells+SI | Viability  | 47981       | 90.07          | 97.44            |   |  |
| 6  | 1. NT Cells+SI | Cy5+       | 8623        | 16.19          | 17.97            |   |  |
| 7  | 1. NT Cells+SI | Cy5-       | 39477       | 74.1           | 82.28            |   |  |
| 8  |                |            |             |                |                  |   |  |
| 9  |                |            |             |                |                  |   |  |
| 10 |                |            |             |                |                  |   |  |



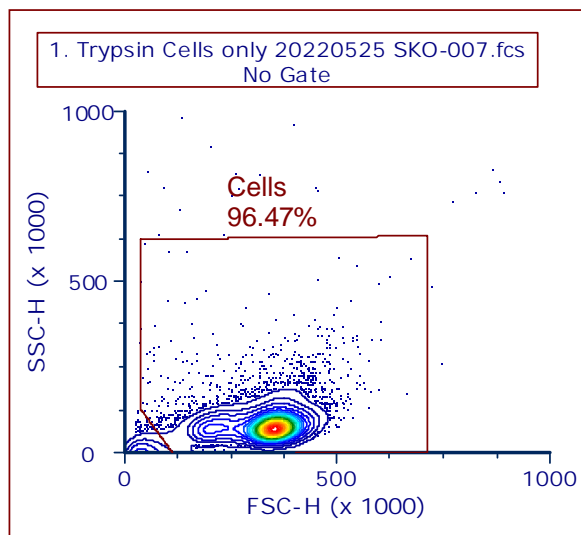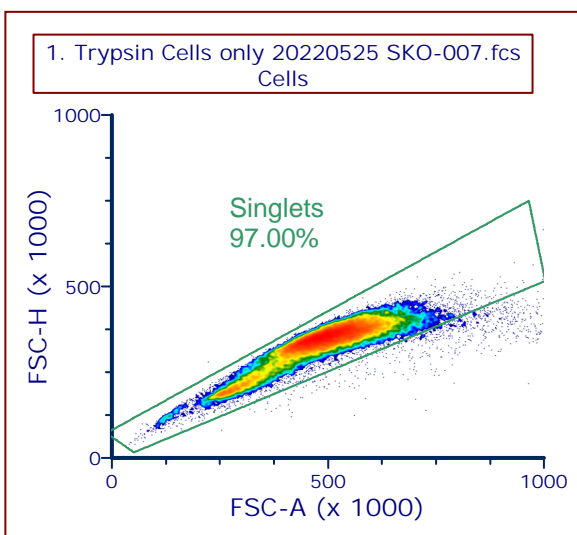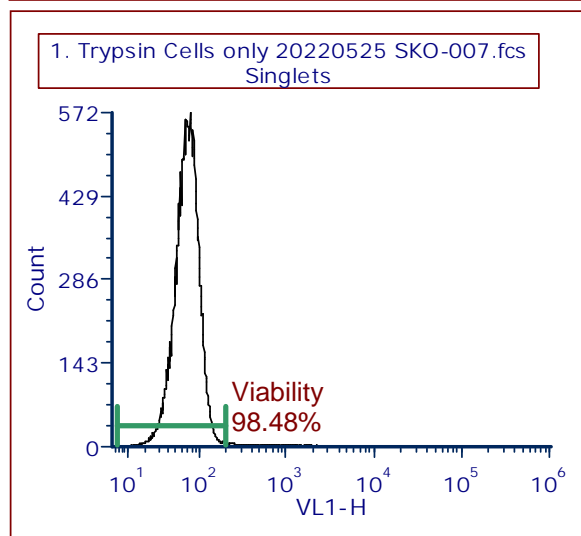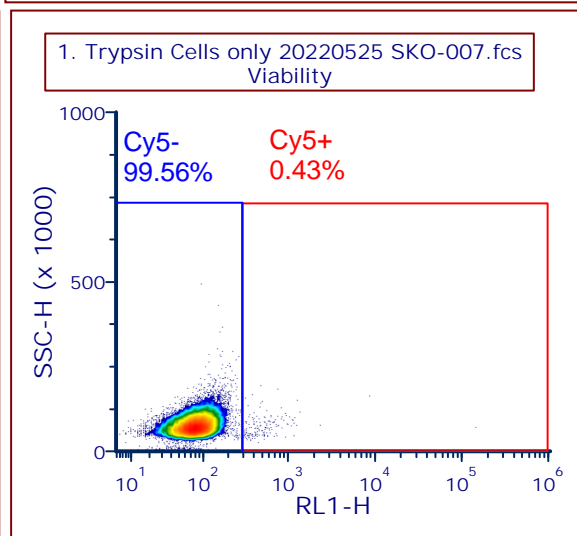

|    | A              | B          | C           | D              | E                | F |  |
|----|----------------|------------|-------------|----------------|------------------|---|--|
| 1  | Filename       | Gate       | # of Events | % of all cells | % of gated cells |   |  |
| 2  | 1. Trypsin Cel | All Events | 39344       | 100            | 100              |   |  |
| 3  | 1. Trypsin Cel | Cells      | 37957       | 96.47          | 96.47            |   |  |
| 4  | 1. Trypsin Cel | Singlets   | 36818       | 93.58          | 97               |   |  |
| 5  | 1. Trypsin Cel | Viability  | 36260       | 92.16          | 98.48            |   |  |
| 6  | 1. Trypsin Cel | Cy5+       | 155         | 0.39           | 0.43             |   |  |
| 7  | 1. Trypsin Cel | Cy5-       | 36100       | 91.75          | 99.56            |   |  |
| 8  |                |            |             |                |                  |   |  |
| 9  |                |            |             |                |                  |   |  |
| 10 |                |            |             |                |                  |   |  |

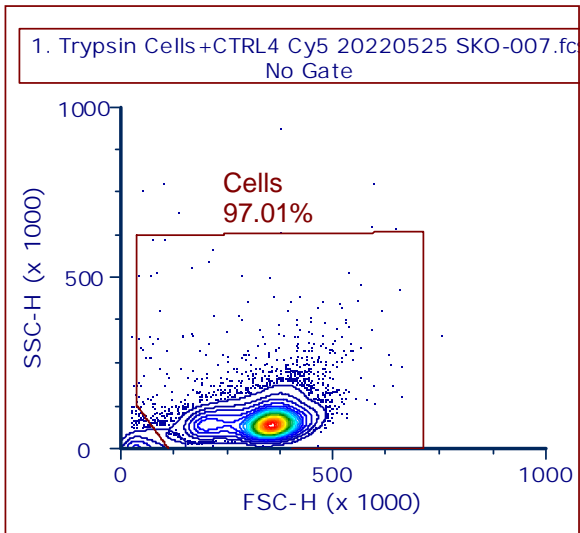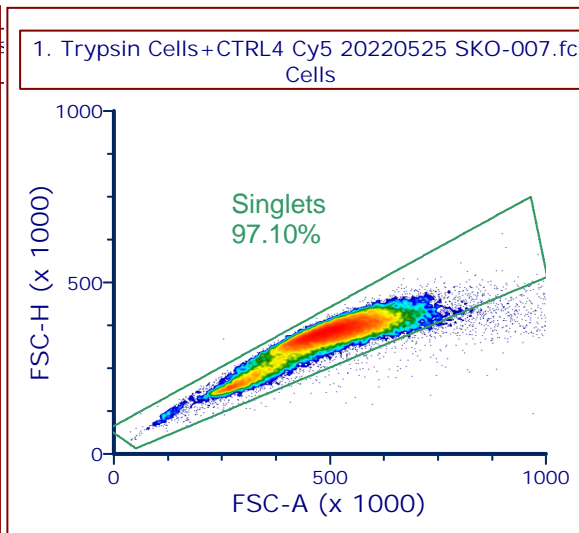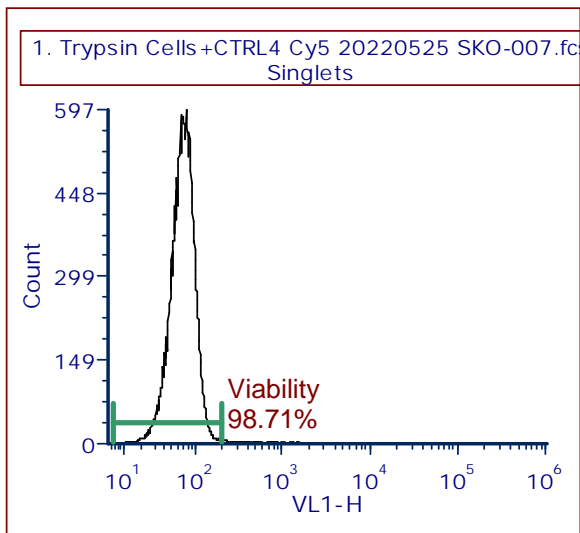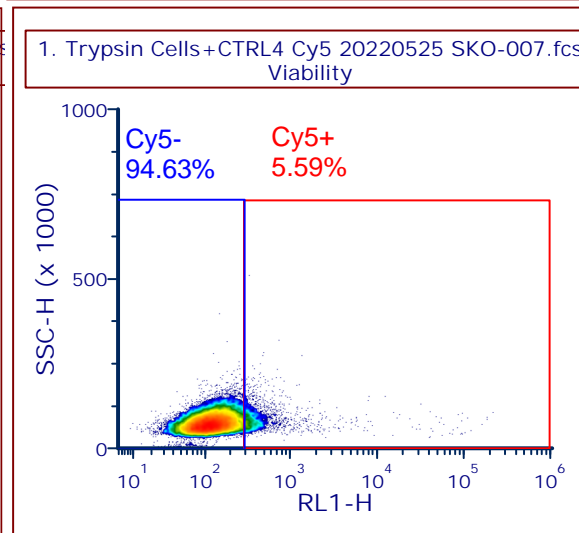

|    | A              | B          | C           | D              | E                | F |  |
|----|----------------|------------|-------------|----------------|------------------|---|--|
| 1  | Filename       | Gate       | # of Events | % of all cells | % of gated cells |   |  |
| 2  | 1. Trypsin Cel | All Events | 40201       | 100            | 100              |   |  |
| 3  | 1. Trypsin Cel | Cells      | 39001       | 97.01          | 97.01            |   |  |
| 4  | 1. Trypsin Cel | Singlets   | 37870       | 94.2           | 97.1             |   |  |
| 5  | 1. Trypsin Cel | Viability  | 37380       | 92.98          | 98.71            |   |  |
| 6  | 1. Trypsin Cel | Cy5+       | 2091        | 5.2            | 5.59             |   |  |
| 7  | 1. Trypsin Cel | Cy5-       | 35371       | 87.99          | 94.63            |   |  |
| 8  |                |            |             |                |                  |   |  |
| 9  |                |            |             |                |                  |   |  |
| 10 |                |            |             |                |                  |   |  |

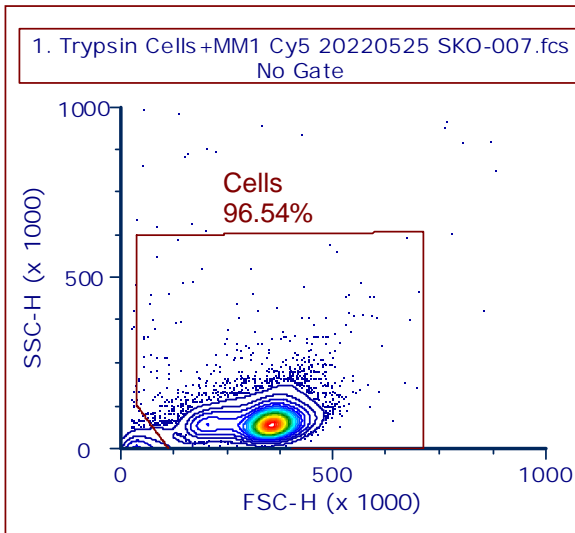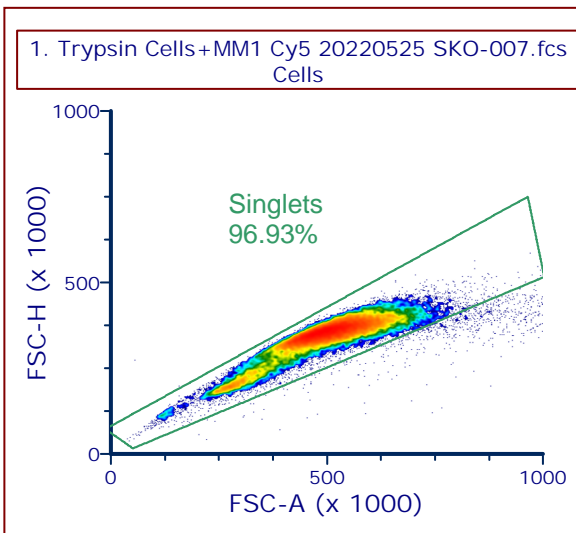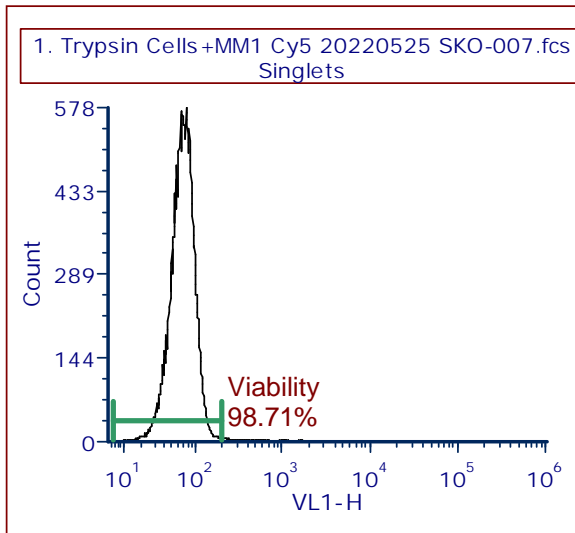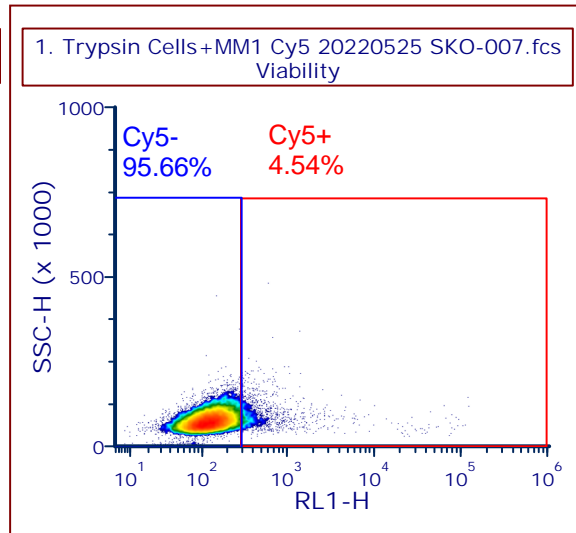

|    | A              | B          | C           | D              | E                | F |  |
|----|----------------|------------|-------------|----------------|------------------|---|--|
| 1  | Filename       | Gate       | # of Events | % of all cells | % of gated cells |   |  |
| 2  | 1. Trypsin Cel | All Events | 39057       | 100            | 100              |   |  |
| 3  | 1. Trypsin Cel | Cells      | 37704       | 96.54          | 96.54            |   |  |
| 4  | 1. Trypsin Cel | Singlets   | 36548       | 93.58          | 96.93            |   |  |
| 5  | 1. Trypsin Cel | Viability  | 36078       | 92.37          | 98.71            |   |  |
| 6  | 1. Trypsin Cel | Cy5+       | 1639        | 4.2            | 4.54             |   |  |
| 7  | 1. Trypsin Cel | Cy5-       | 34514       | 88.37          | 95.66            |   |  |
| 8  |                |            |             |                |                  |   |  |
| 9  |                |            |             |                |                  |   |  |
| 10 |                |            |             |                |                  |   |  |

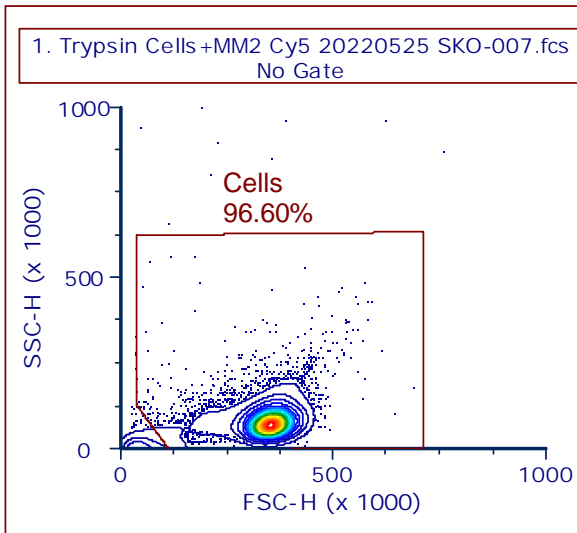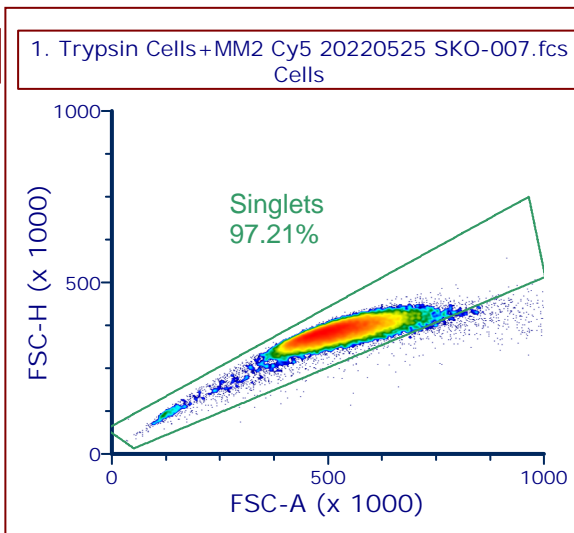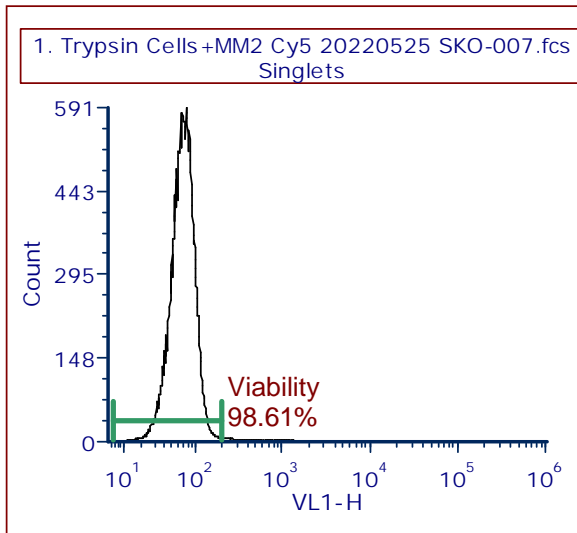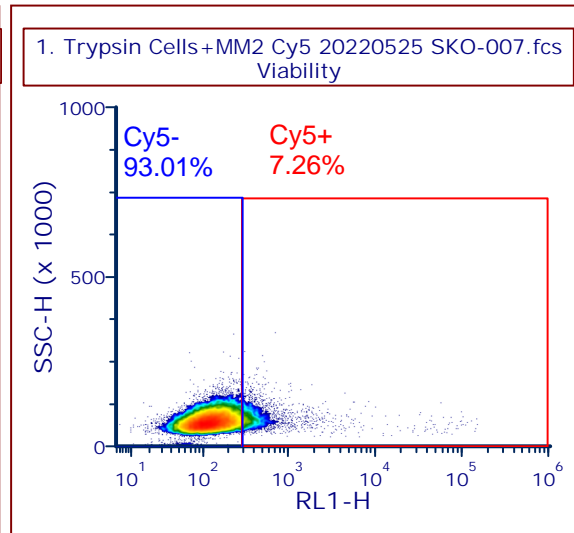

|    | A              | B          | C           | D              | E                | F |
|----|----------------|------------|-------------|----------------|------------------|---|
| 1  | Filename       | Gate       | # of Events | % of all cells | % of gated cells |   |
| 2  | 1. Trypsin Cel | All Events | 39902       | 100            | 100              |   |
| 3  | 1. Trypsin Cel | Cells      | 38545       | 96.6           | 96.6             |   |
| 4  | 1. Trypsin Cel | Singlets   | 37471       | 93.91          | 97.21            |   |
| 5  | 1. Trypsin Cel | Viability  | 36951       | 92.6           | 98.61            |   |
| 6  | 1. Trypsin Cel | Cy5+       | 2683        | 6.72           | 7.26             |   |
| 7  | 1. Trypsin Cel | Cy5-       | 34367       | 86.13          | 93.01            |   |
| 8  |                |            |             |                |                  |   |
| 9  |                |            |             |                |                  |   |
| 10 |                |            |             |                |                  |   |

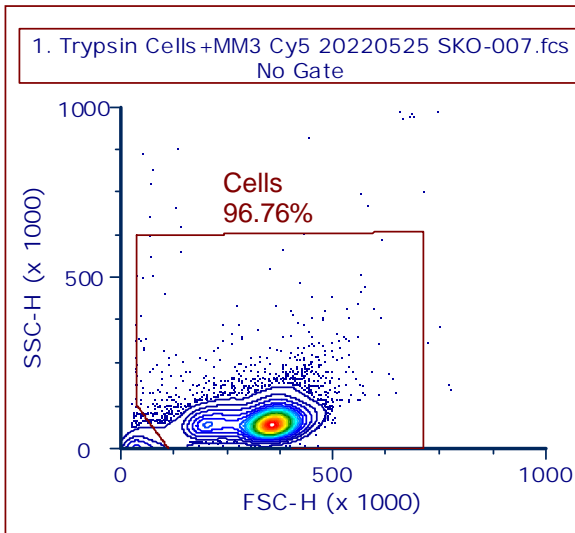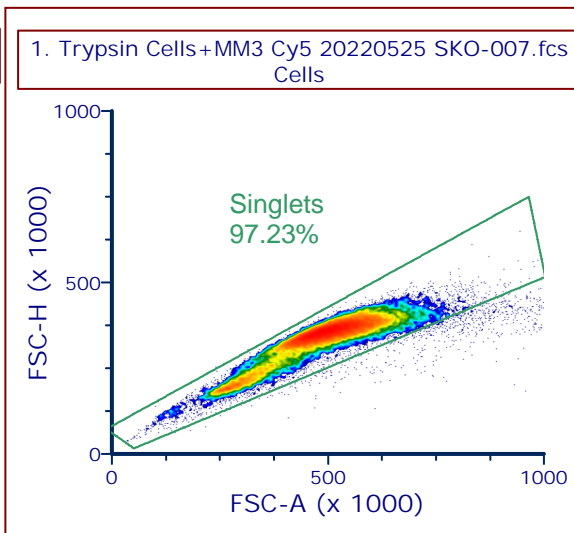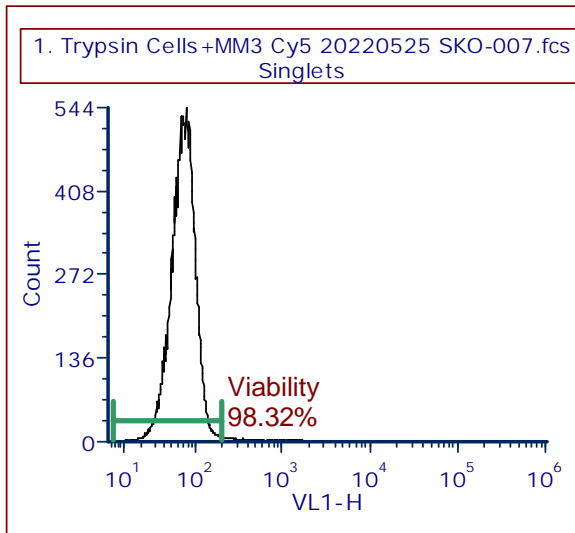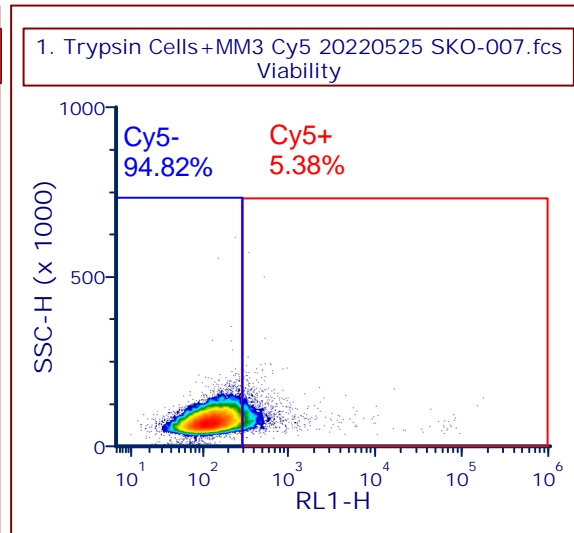

|    | A              | B          | C           | D              | E                | F |  |
|----|----------------|------------|-------------|----------------|------------------|---|--|
| 1  | Filename       | Gate       | # of Events | % of all cells | % of gated cells |   |  |
| 2  | 1. Trypsin Cel | All Events | 37545       | 100            | 100              |   |  |
| 3  | 1. Trypsin Cel | Cells      | 36329       | 96.76          | 96.76            |   |  |
| 4  | 1. Trypsin Cel | Singlets   | 35323       | 94.08          | 97.23            |   |  |
| 5  | 1. Trypsin Cel | Viability  | 34730       | 92.5           | 98.32            |   |  |
| 6  | 1. Trypsin Cel | Cy5+       | 1869        | 4.98           | 5.38             |   |  |
| 7  | 1. Trypsin Cel | Cy5-       | 32932       | 87.71          | 94.82            |   |  |
| 8  |                |            |             |                |                  |   |  |
| 9  |                |            |             |                |                  |   |  |
| 10 |                |            |             |                |                  |   |  |

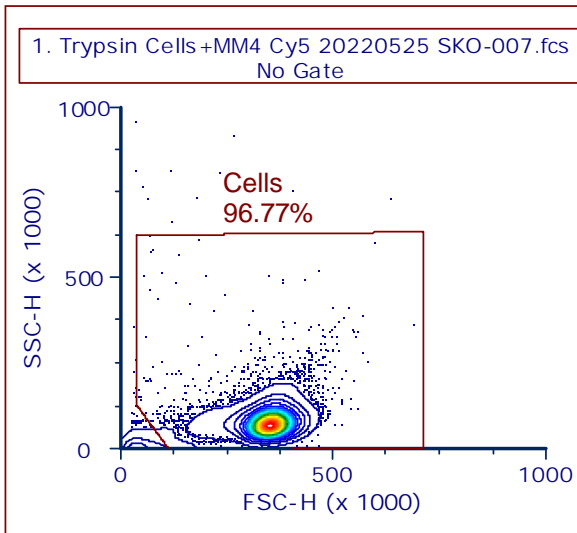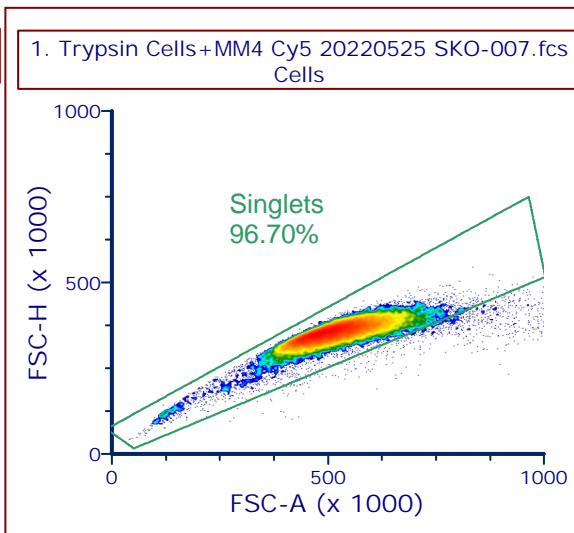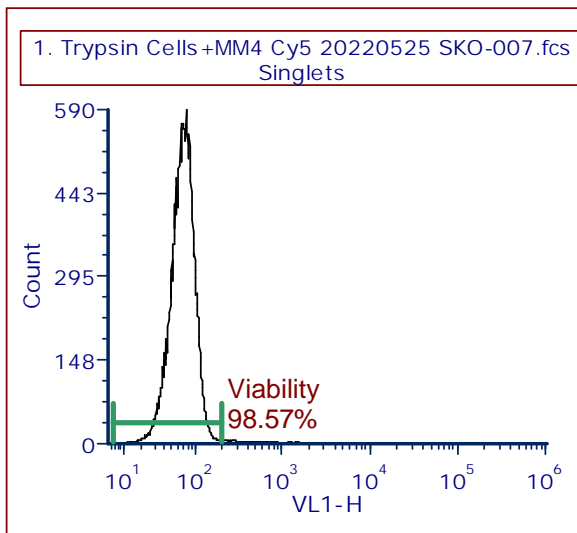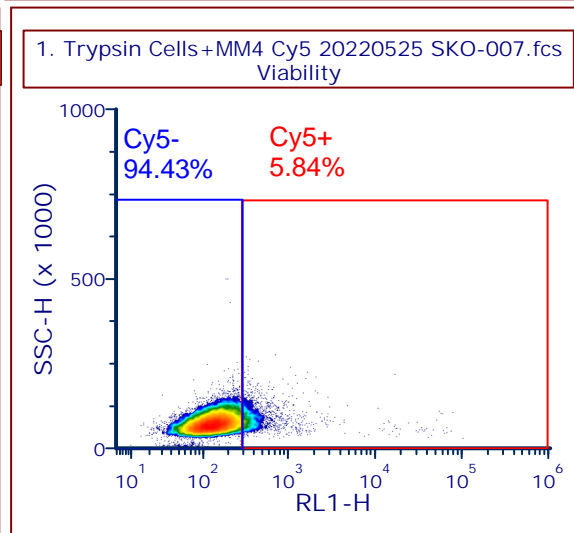

|    | A              | B          | C           | D              | E                | F |
|----|----------------|------------|-------------|----------------|------------------|---|
| 1  | Filename       | Gate       | # of Events | % of all cells | % of gated cells |   |
| 2  | 1. Trypsin Cel | All Events | 39127       | 100            | 100              |   |
| 3  | 1. Trypsin Cel | Cells      | 37865       | 96.77          | 96.77            |   |
| 4  | 1. Trypsin Cel | Singlets   | 36616       | 93.58          | 96.7             |   |
| 5  | 1. Trypsin Cel | Viability  | 36091       | 92.24          | 98.57            |   |
| 6  | 1. Trypsin Cel | Cy5+       | 2107        | 5.39           | 5.84             |   |
| 7  | 1. Trypsin Cel | Cy5-       | 34080       | 87.1           | 94.43            |   |
| 8  |                |            |             |                |                  |   |
| 9  |                |            |             |                |                  |   |
| 10 |                |            |             |                |                  |   |

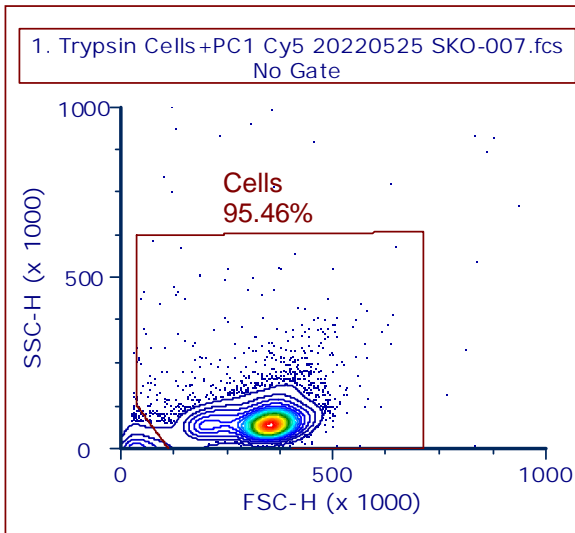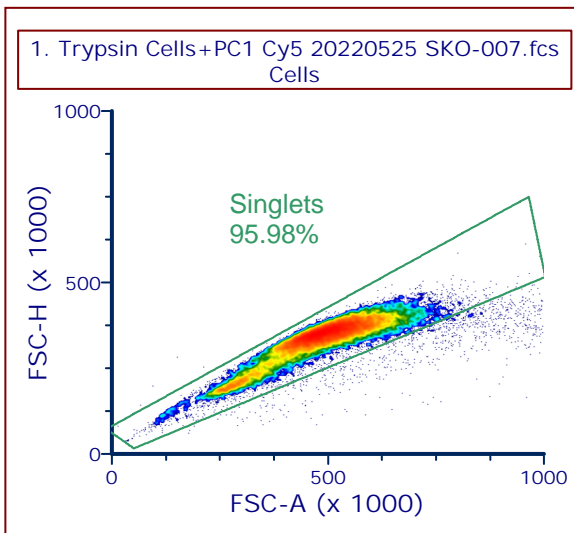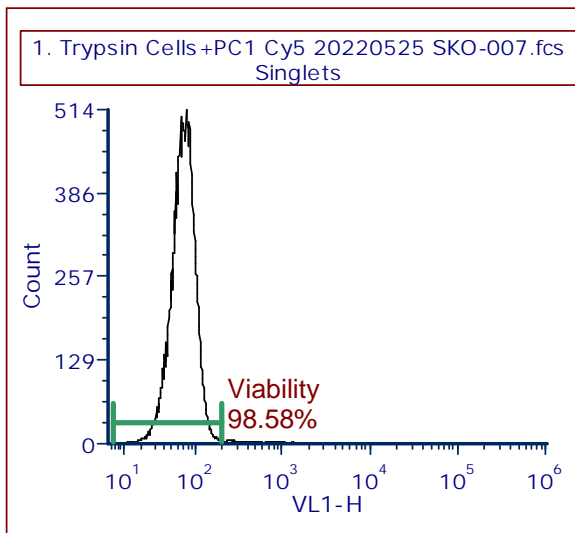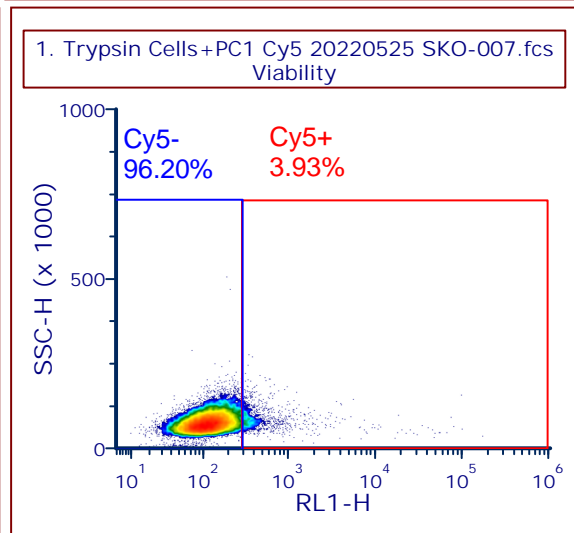

|    | A              | B          | C           | D              | E                | F |  |
|----|----------------|------------|-------------|----------------|------------------|---|--|
| 1  | Filename       | Gate       | # of Events | % of all cells | % of gated cells |   |  |
| 2  | 1. Trypsin Cel | All Events | 35939       | 100            | 100              |   |  |
| 3  | 1. Trypsin Cel | Cells      | 34309       | 95.46          | 95.46            |   |  |
| 4  | 1. Trypsin Cel | Singlets   | 32931       | 91.63          | 95.98            |   |  |
| 5  | 1. Trypsin Cel | Viability  | 32462       | 90.33          | 98.58            |   |  |
| 6  | 1. Trypsin Cel | Cy5+       | 1276        | 3.55           | 3.93             |   |  |
| 7  | 1. Trypsin Cel | Cy5-       | 31228       | 86.89          | 96.2             |   |  |
| 8  |                |            |             |                |                  |   |  |
| 9  |                |            |             |                |                  |   |  |
| 10 |                |            |             |                |                  |   |  |

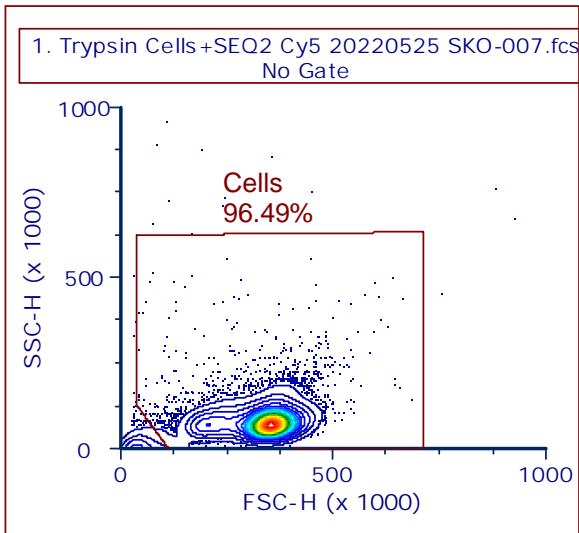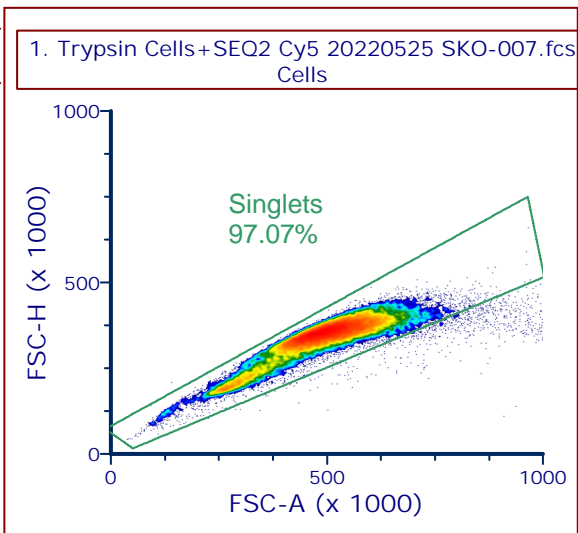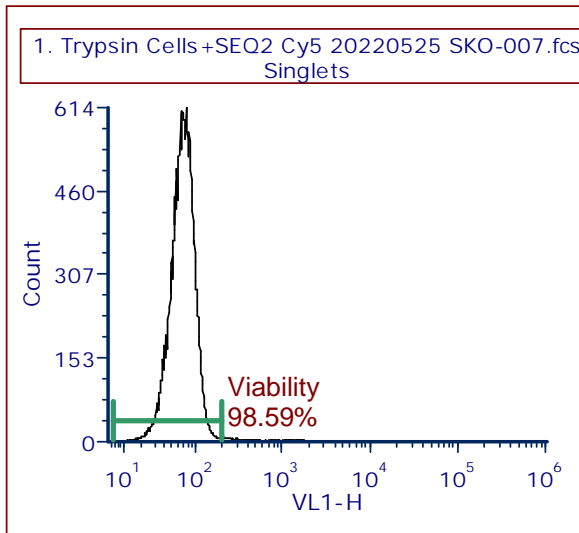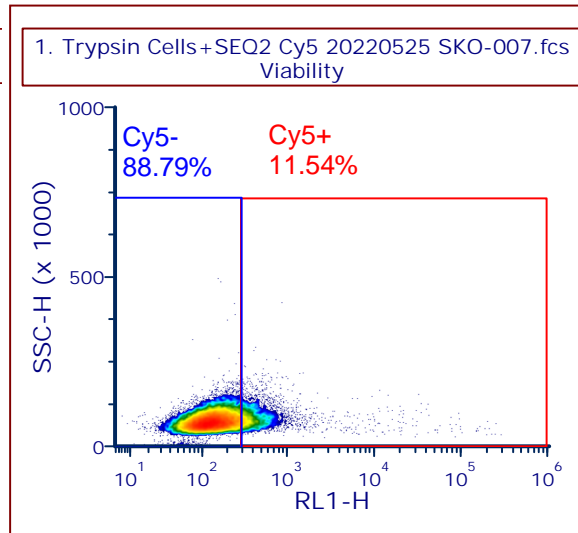

|    | A              | B          | C           | D              | E                | F |
|----|----------------|------------|-------------|----------------|------------------|---|
| 1  | Filename       | Gate       | # of Events | % of all cells | % of gated cells |   |
| 2  | 1. Trypsin Cel | All Events | 41557       | 100            | 100              |   |
| 3  | 1. Trypsin Cel | Cells      | 40097       | 96.49          | 96.49            |   |
| 4  | 1. Trypsin Cel | Singlets   | 38922       | 93.66          | 97.07            |   |
| 5  | 1. Trypsin Cel | Viability  | 38372       | 92.34          | 98.59            |   |
| 6  | 1. Trypsin Cel | Cy5+       | 4427        | 10.65          | 11.54            |   |
| 7  | 1. Trypsin Cel | Cy5-       | 34069       | 81.98          | 88.79            |   |
| 8  |                |            |             |                |                  |   |
| 9  |                |            |             |                |                  |   |
| 10 |                |            |             |                |                  |   |



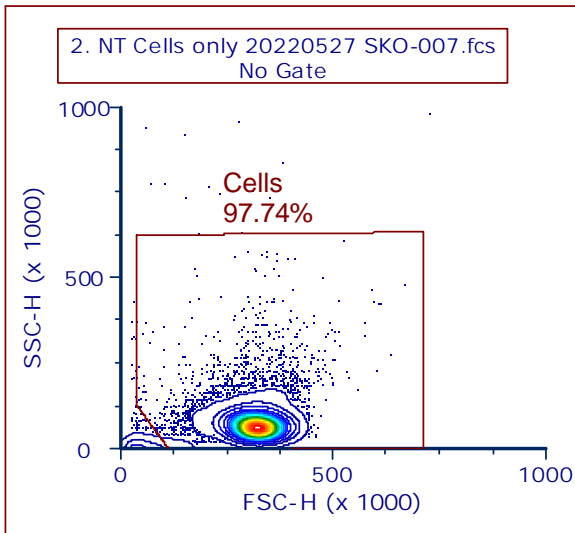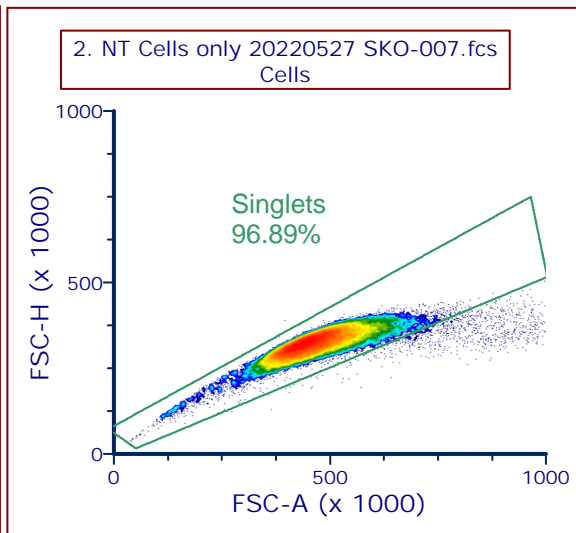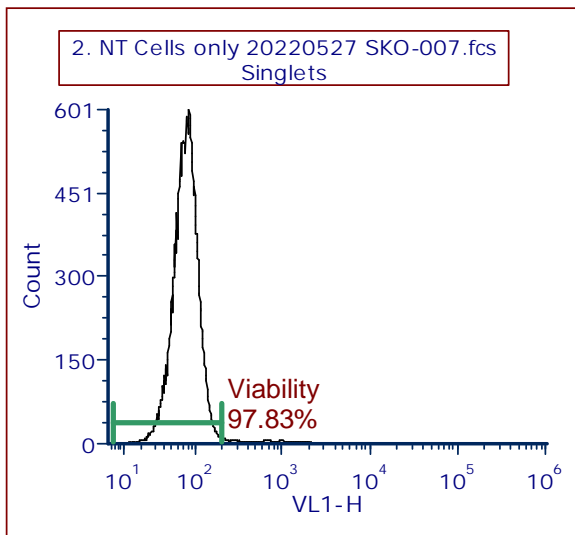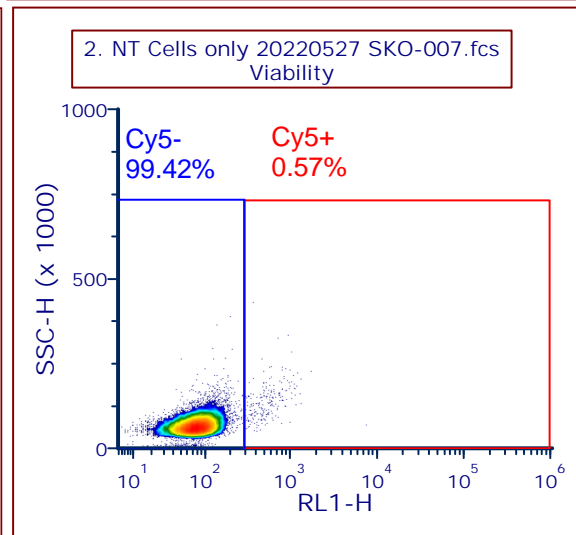

|    | A              | B          | C           | D              | E                | F |  |
|----|----------------|------------|-------------|----------------|------------------|---|--|
| 1  | Filename       | Gate       | # of Events | % of all cells | % of gated cells |   |  |
| 2  | 2. NT Cells or | All Events | 41568       | 100            | 100              |   |  |
| 3  | 2. NT Cells or | Cells      | 40630       | 97.74          | 97.74            |   |  |
| 4  | 2. NT Cells or | Singlets   | 39368       | 94.71          | 96.89            |   |  |
| 5  | 2. NT Cells or | Viability  | 38512       | 92.65          | 97.83            |   |  |
| 6  | 2. NT Cells or | Cy5+       | 220         | 0.53           | 0.57             |   |  |
| 7  | 2. NT Cells or | Cy5-       | 38288       | 92.11          | 99.42            |   |  |
| 8  |                |            |             |                |                  |   |  |
| 9  |                |            |             |                |                  |   |  |
| 10 |                |            |             |                |                  |   |  |

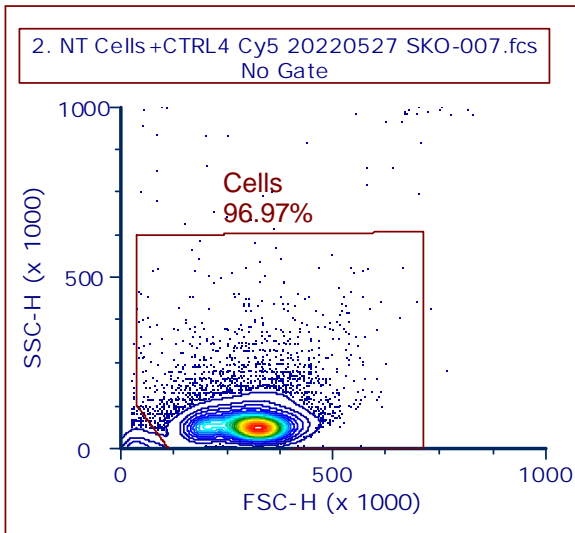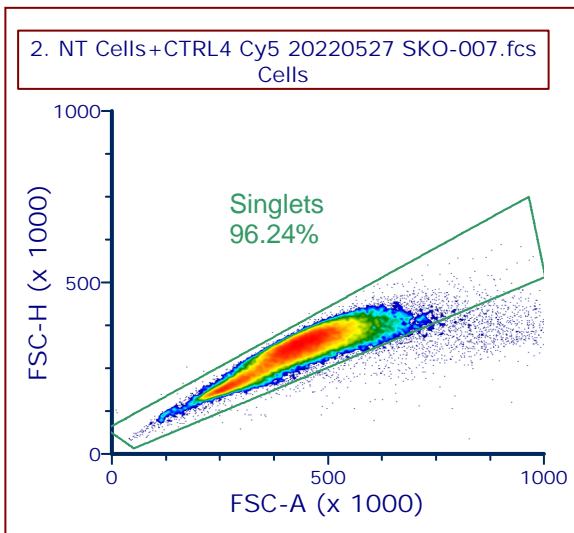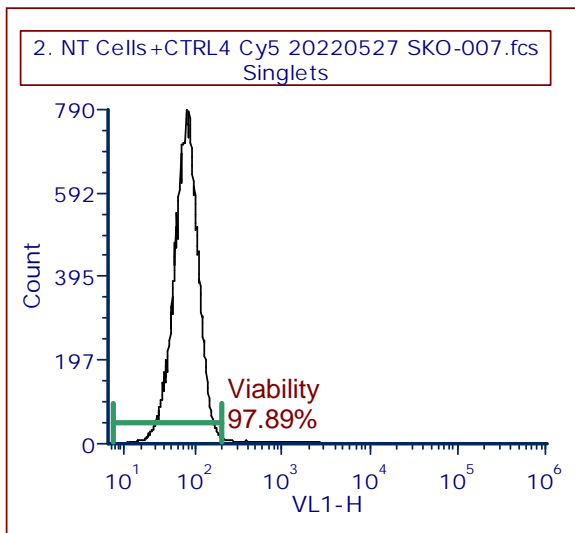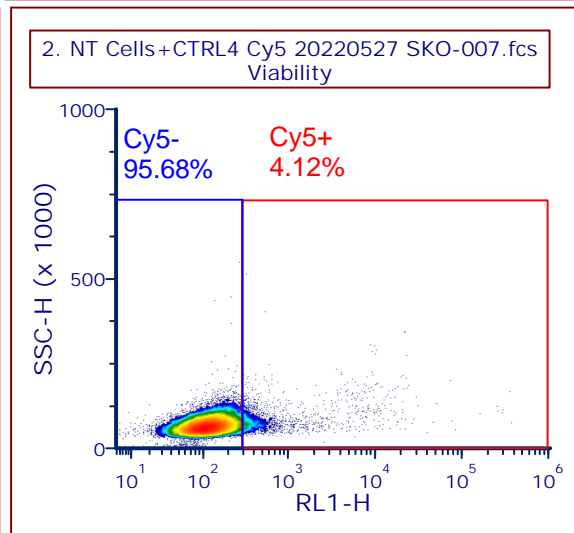

|    | A             | B          | C           | D              | E                | F |  |
|----|---------------|------------|-------------|----------------|------------------|---|--|
| 1  | Filename      | Gate       | # of Events | % of all cells | % of gated cells |   |  |
| 2  | 2. NT Cells+C | All Events | 56411       | 100            | 100              |   |  |
| 3  | 2. NT Cells+C | Cells      | 54701       | 96.97          | 96.97            |   |  |
| 4  | 2. NT Cells+C | Singlets   | 52646       | 93.33          | 96.24            |   |  |
| 5  | 2. NT Cells+C | Viability  | 51534       | 91.35          | 97.89            |   |  |
| 6  | 2. NT Cells+C | Cy5+       | 2123        | 3.76           | 4.12             |   |  |
| 7  | 2. NT Cells+C | Cy5-       | 49310       | 87.41          | 95.68            |   |  |
| 8  |               |            |             |                |                  |   |  |
| 9  |               |            |             |                |                  |   |  |
| 10 |               |            |             |                |                  |   |  |

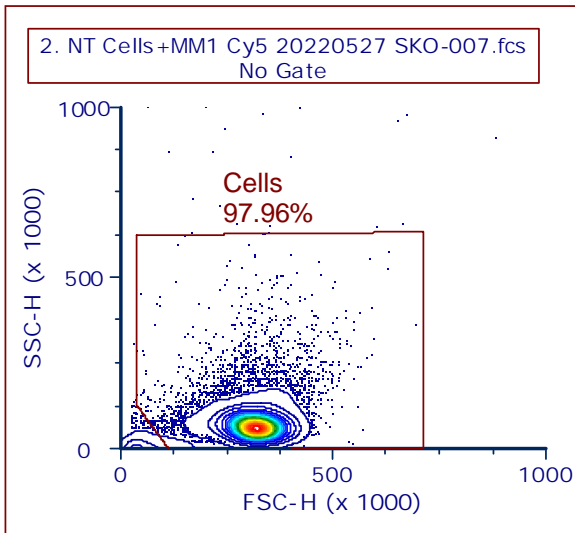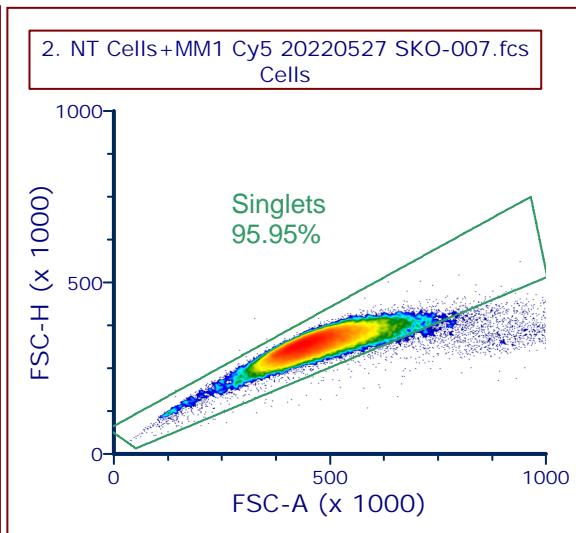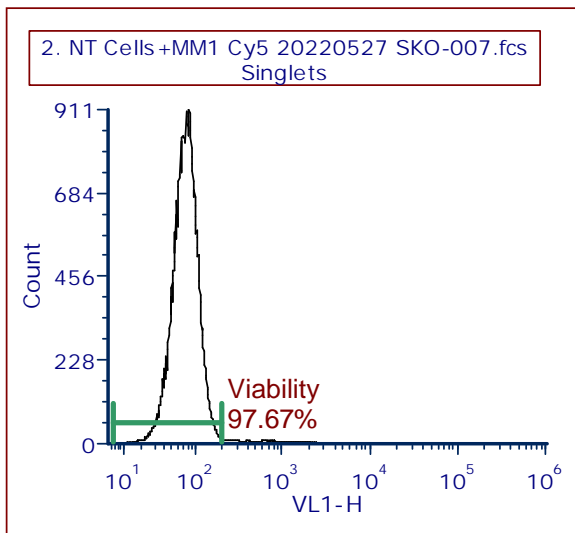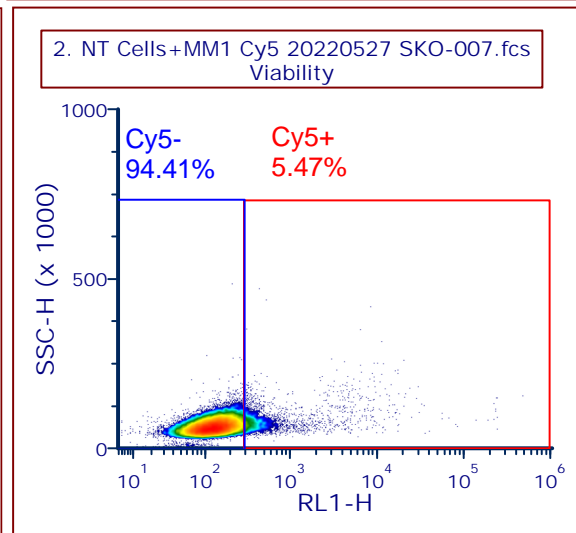

|    | A             | B          | C           | D              | E                | F |  |
|----|---------------|------------|-------------|----------------|------------------|---|--|
| 1  | Filename      | Gate       | # of Events | % of all cells | % of gated cells |   |  |
| 2  | 2. NT Cells+M | All Events | 65579       | 100            | 100              |   |  |
| 3  | 2. NT Cells+M | Cells      | 64240       | 97.96          | 97.96            |   |  |
| 4  | 2. NT Cells+M | Singlets   | 61636       | 93.99          | 95.95            |   |  |
| 5  | 2. NT Cells+M | Viability  | 60198       | 91.79          | 97.67            |   |  |
| 6  | 2. NT Cells+M | Cy5+       | 3290        | 5.02           | 5.47             |   |  |
| 7  | 2. NT Cells+M | Cy5-       | 56833       | 86.66          | 94.41            |   |  |
| 8  |               |            |             |                |                  |   |  |
| 9  |               |            |             |                |                  |   |  |
| 10 |               |            |             |                |                  |   |  |

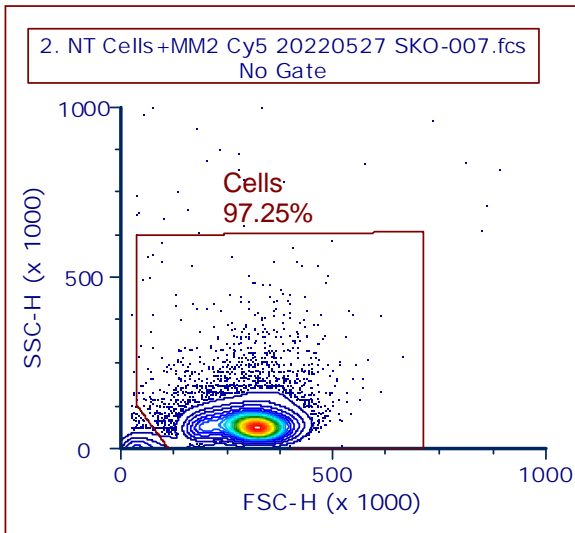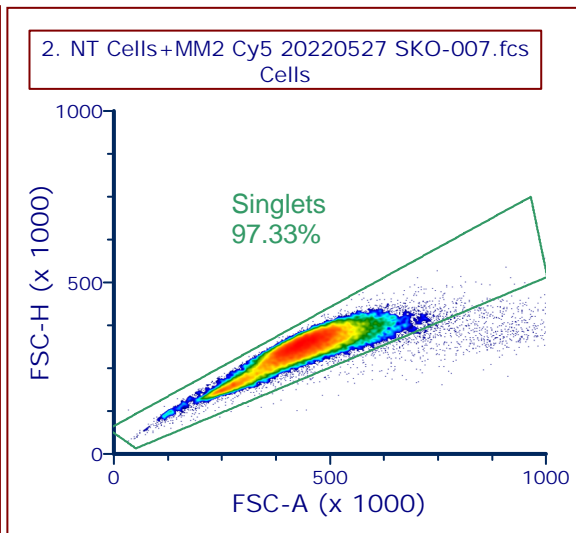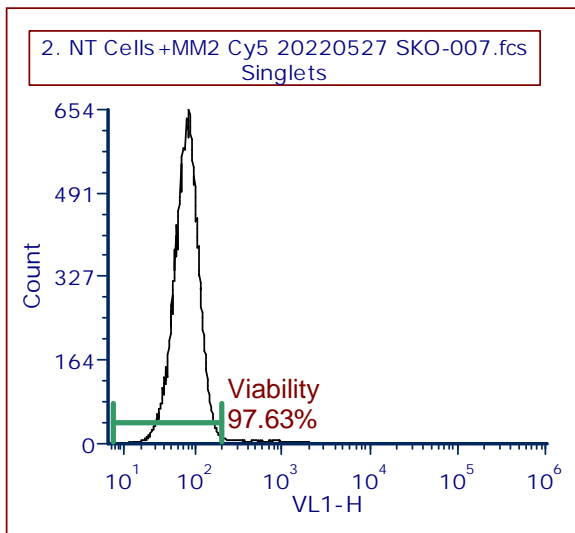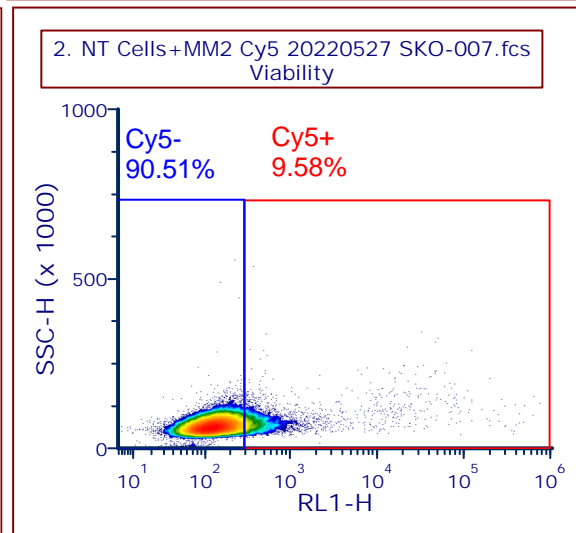

|    | A             | B          | C           | D              | E                | F |  |
|----|---------------|------------|-------------|----------------|------------------|---|--|
| 1  | Filename      | Gate       | # of Events | % of all cells | % of gated cells |   |  |
| 2  | 2. NT Cells+M | All Events | 46083       | 100            | 100              |   |  |
| 3  | 2. NT Cells+M | Cells      | 44815       | 97.25          | 97.25            |   |  |
| 4  | 2. NT Cells+M | Singlets   | 43619       | 94.65          | 97.33            |   |  |
| 5  | 2. NT Cells+M | Viability  | 42586       | 92.41          | 97.63            |   |  |
| 6  | 2. NT Cells+M | Cy5+       | 4081        | 8.86           | 9.58             |   |  |
| 7  | 2. NT Cells+M | Cy5-       | 38545       | 83.64          | 90.51            |   |  |
| 8  |               |            |             |                |                  |   |  |
| 9  |               |            |             |                |                  |   |  |
| 10 |               |            |             |                |                  |   |  |

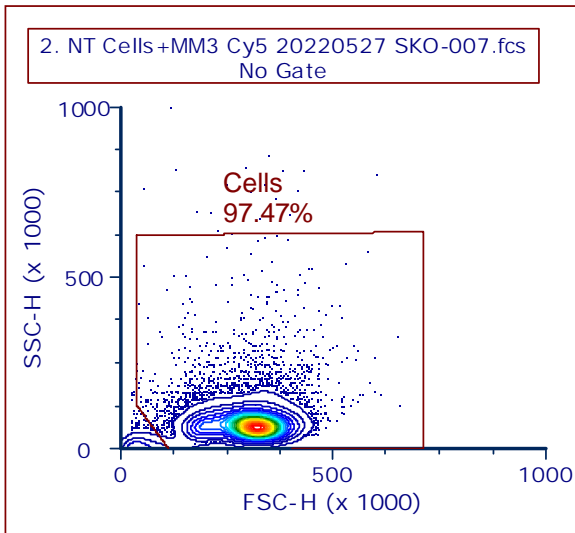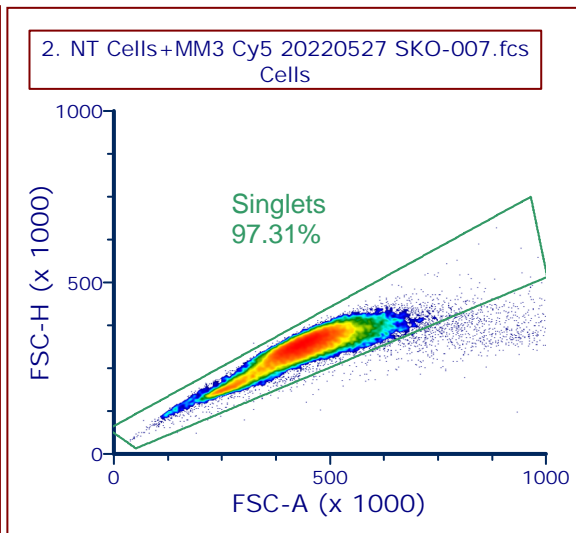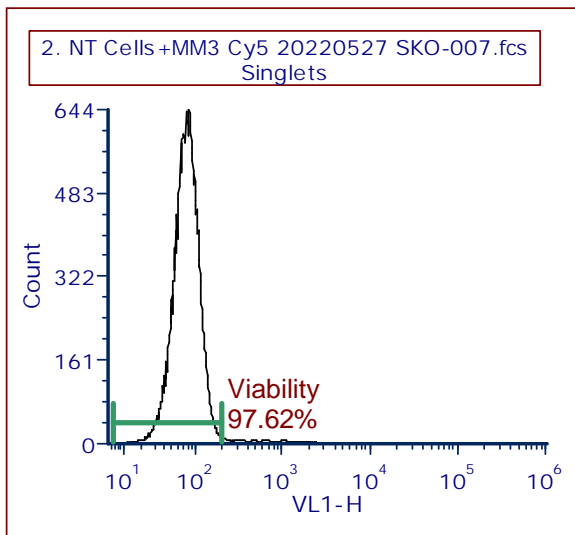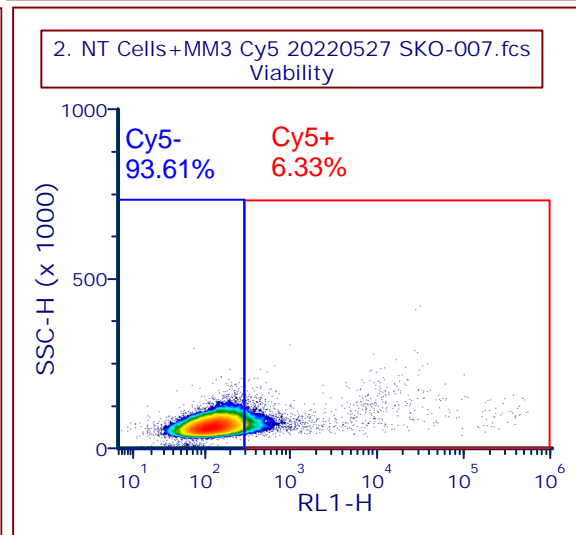

|    | A             | B          | C           | D              | E                | F |  |
|----|---------------|------------|-------------|----------------|------------------|---|--|
| 1  | Filename      | Gate       | # of Events | % of all cells | % of gated cells |   |  |
| 2  | 2. NT Cells+M | All Events | 46601       | 100            | 100              |   |  |
| 3  | 2. NT Cells+M | Cells      | 45424       | 97.47          | 97.47            |   |  |
| 4  | 2. NT Cells+M | Singlets   | 44204       | 94.86          | 97.31            |   |  |
| 5  | 2. NT Cells+M | Viability  | 43154       | 92.6           | 97.62            |   |  |
| 6  | 2. NT Cells+M | Cy5+       | 2730        | 5.86           | 6.33             |   |  |
| 7  | 2. NT Cells+M | Cy5-       | 40397       | 86.69          | 93.61            |   |  |
| 8  |               |            |             |                |                  |   |  |
| 9  |               |            |             |                |                  |   |  |
| 10 |               |            |             |                |                  |   |  |

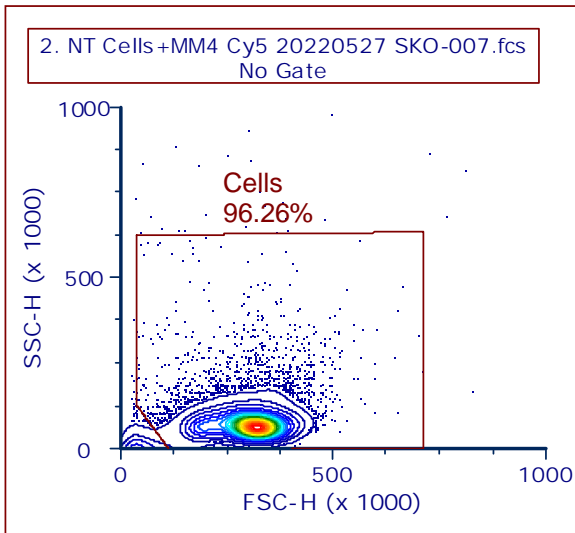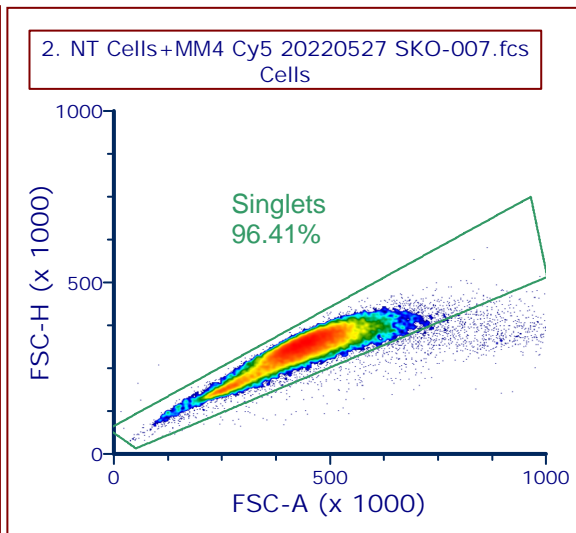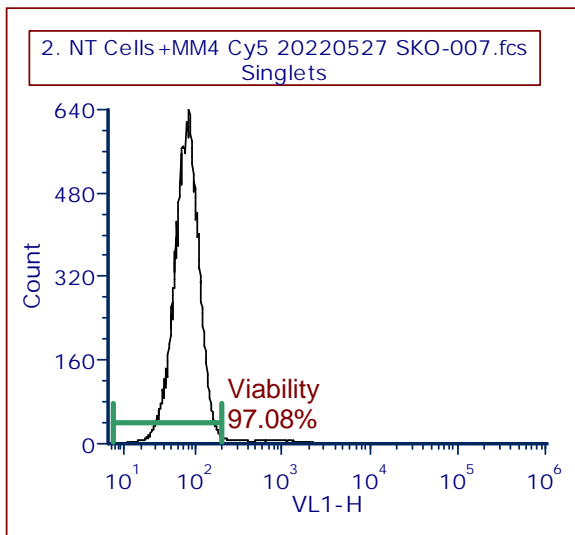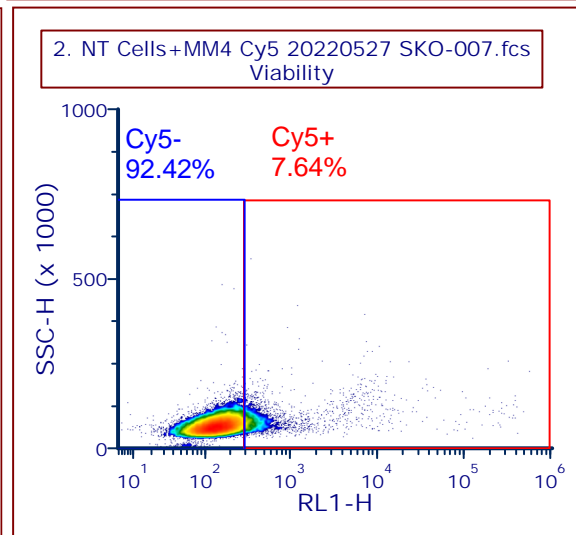

|    | A             | B          | C           | D              | E                | F |  |
|----|---------------|------------|-------------|----------------|------------------|---|--|
| 1  | Filename      | Gate       | # of Events | % of all cells | % of gated cells |   |  |
| 2  | 2. NT Cells+M | All Events | 46681       | 100            | 100              |   |  |
| 3  | 2. NT Cells+M | Cells      | 44934       | 96.26          | 96.26            |   |  |
| 4  | 2. NT Cells+M | Singlets   | 43322       | 92.8           | 96.41            |   |  |
| 5  | 2. NT Cells+M | Viability  | 42055       | 90.09          | 97.08            |   |  |
| 6  | 2. NT Cells+M | Cy5+       | 3215        | 6.89           | 7.64             |   |  |
| 7  | 2. NT Cells+M | Cy5-       | 38866       | 83.26          | 92.42            |   |  |
| 8  |               |            |             |                |                  |   |  |
| 9  |               |            |             |                |                  |   |  |
| 10 |               |            |             |                |                  |   |  |

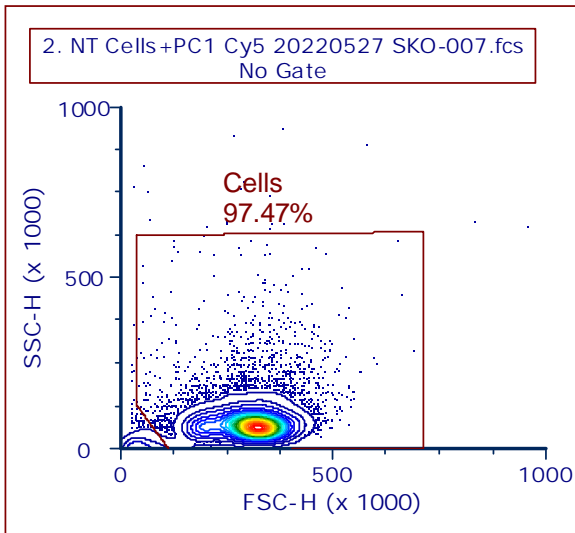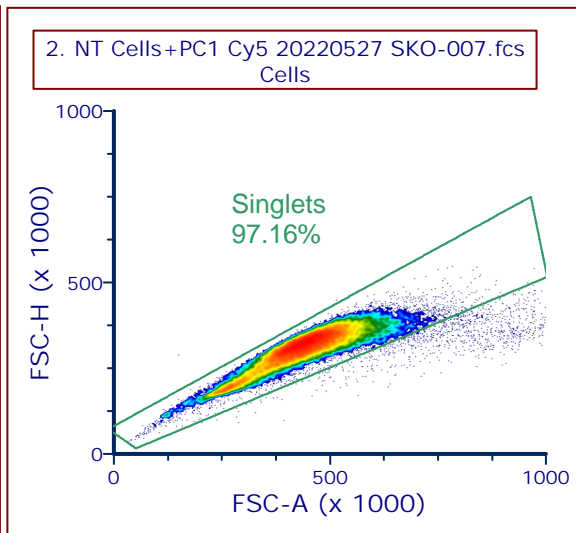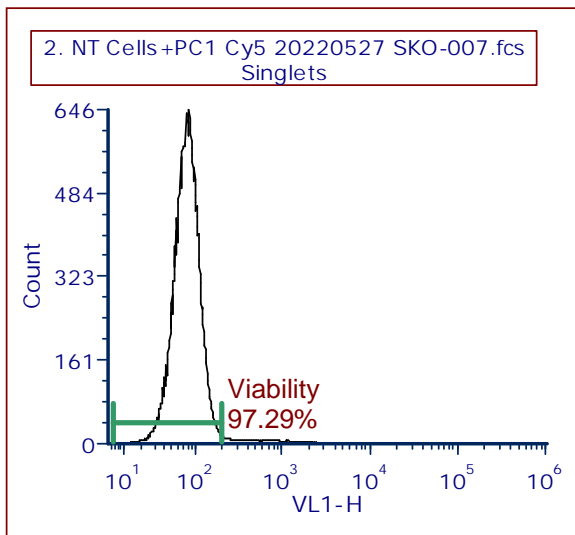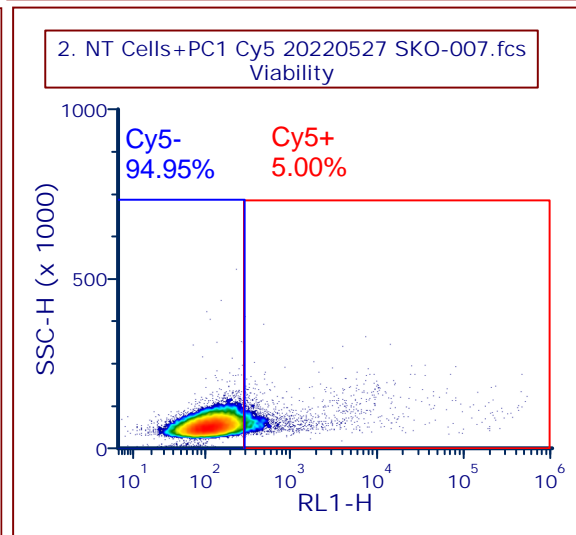

|    | A               | B          | C           | D              | E                | F |  |
|----|-----------------|------------|-------------|----------------|------------------|---|--|
| 1  | Filename        | Gate       | # of Events | % of all cells | % of gated cells |   |  |
| 2  | 2. NT Cells+PC1 | All Events | 46659       | 100            | 100              |   |  |
| 3  | 2. NT Cells+PC1 | Cells      | 45477       | 97.47          | 97.47            |   |  |
| 4  | 2. NT Cells+PC1 | Singlets   | 44185       | 94.7           | 97.16            |   |  |
| 5  | 2. NT Cells+PC1 | Viability  | 42989       | 92.13          | 97.29            |   |  |
| 6  | 2. NT Cells+PC1 | Cy5+       | 2150        | 4.61           | 5                |   |  |
| 7  | 2. NT Cells+PC1 | Cy5-       | 40816       | 87.48          | 94.95            |   |  |
| 8  |                 |            |             |                |                  |   |  |
| 9  |                 |            |             |                |                  |   |  |
| 10 |                 |            |             |                |                  |   |  |

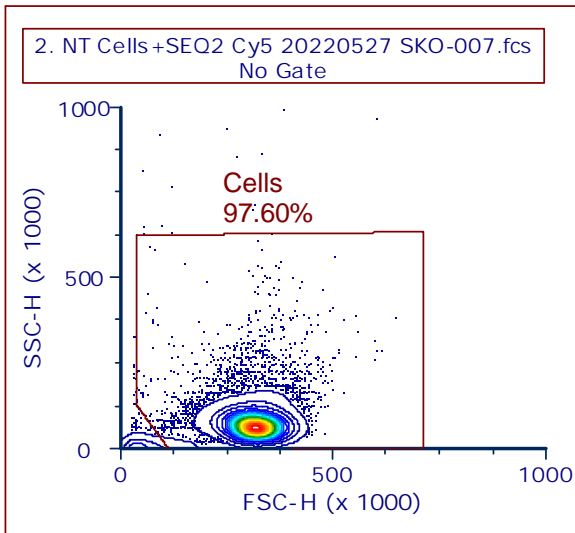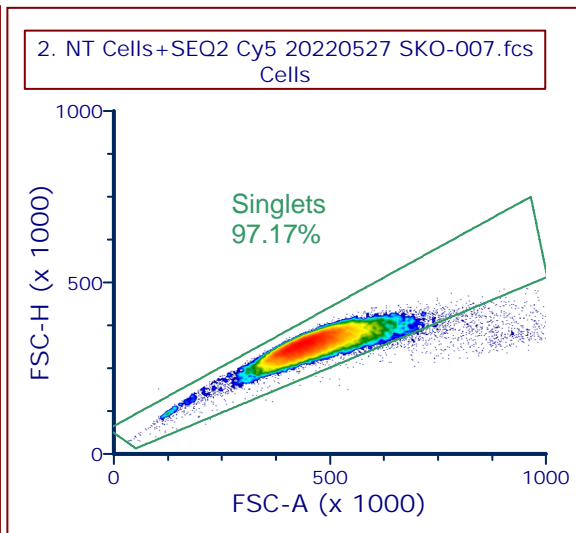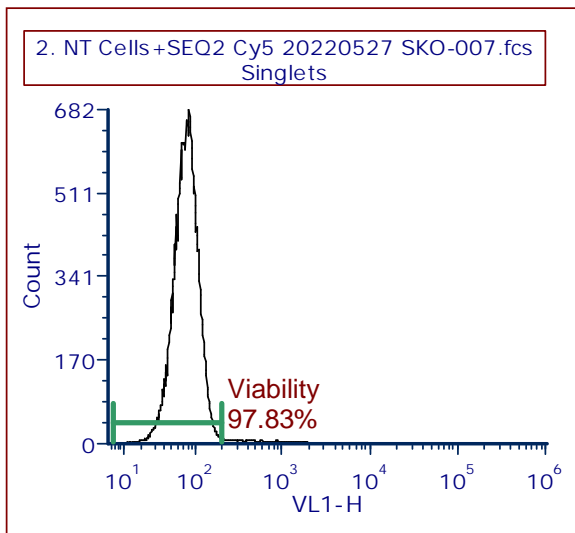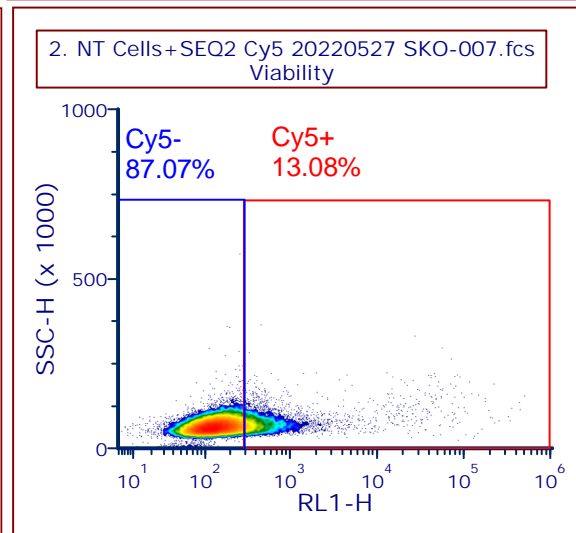

|    | A              | B          | C           | D              | E                | F |  |
|----|----------------|------------|-------------|----------------|------------------|---|--|
| 1  | Filename       | Gate       | # of Events | % of all cells | % of gated cells |   |  |
| 2  | 2. NT Cells+SI | All Events | 47475       | 100            | 100              |   |  |
| 3  | 2. NT Cells+SI | Cells      | 46337       | 97.6           | 97.6             |   |  |
| 4  | 2. NT Cells+SI | Singlets   | 45024       | 94.84          | 97.17            |   |  |
| 5  | 2. NT Cells+SI | Viability  | 44045       | 92.78          | 97.83            |   |  |
| 6  | 2. NT Cells+SI | Cy5+       | 5759        | 12.13          | 13.08            |   |  |
| 7  | 2. NT Cells+SI | Cy5-       | 38352       | 80.78          | 87.07            |   |  |
| 8  |                |            |             |                |                  |   |  |
| 9  |                |            |             |                |                  |   |  |
| 10 |                |            |             |                |                  |   |  |



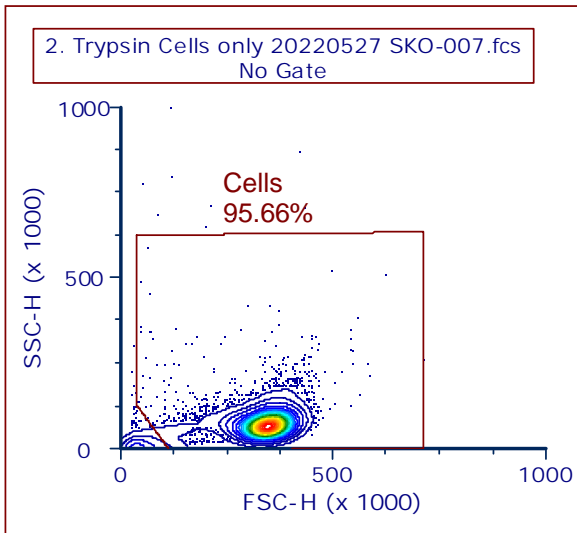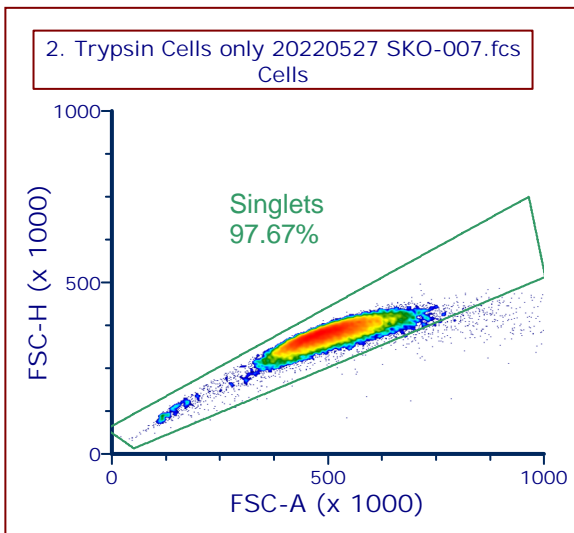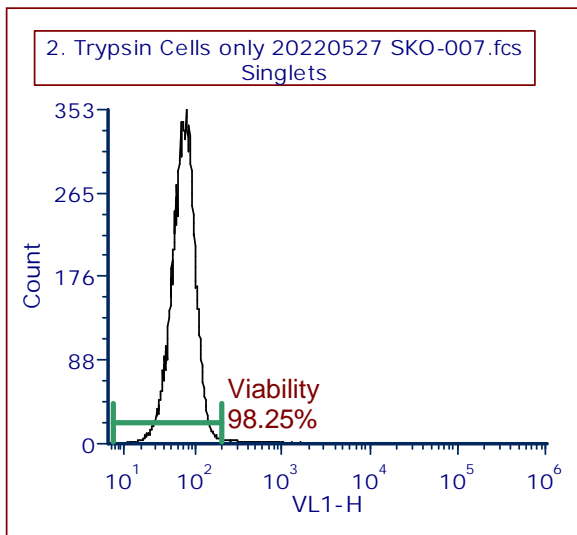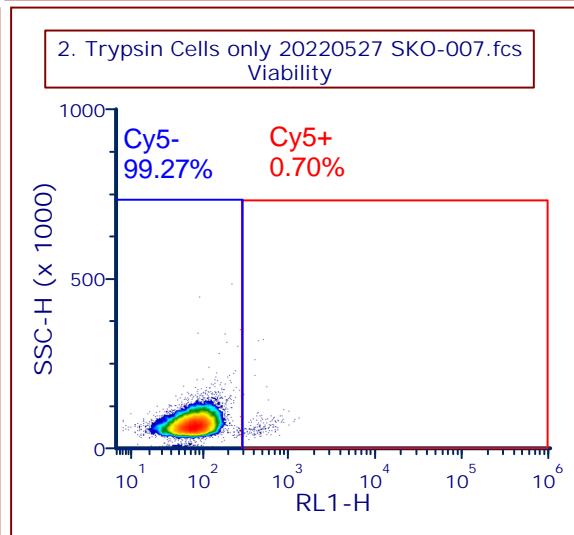

|    | A              | B          | C           | D              | E                | F |
|----|----------------|------------|-------------|----------------|------------------|---|
| 1  | Filename       | Gate       | # of Events | % of all cells | % of gated cells |   |
| 2  | 2. Trypsin Cel | All Events | 24097       | 100            | 100              |   |
| 3  | 2. Trypsin Cel | Cells      | 23050       | 95.66          | 95.66            |   |
| 4  | 2. Trypsin Cel | Singlets   | 22512       | 93.42          | 97.67            |   |
| 5  | 2. Trypsin Cel | Viability  | 22118       | 91.79          | 98.25            |   |
| 6  | 2. Trypsin Cel | Cy5+       | 155         | 0.64           | 0.7              |   |
| 7  | 2. Trypsin Cel | Cy5-       | 21957       | 91.12          | 99.27            |   |
| 8  |                |            |             |                |                  |   |
| 9  |                |            |             |                |                  |   |
| 10 |                |            |             |                |                  |   |

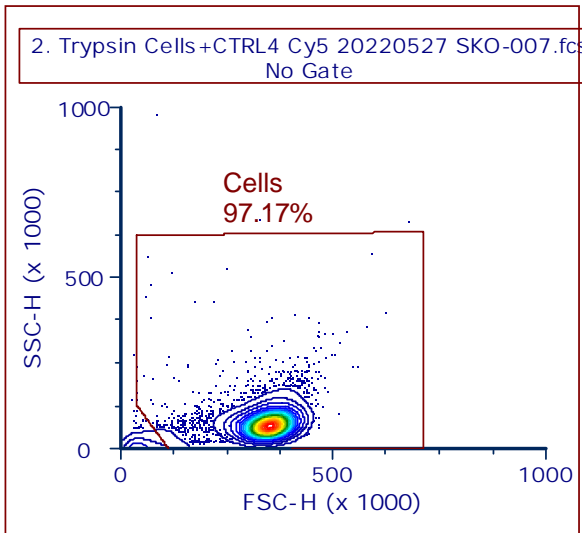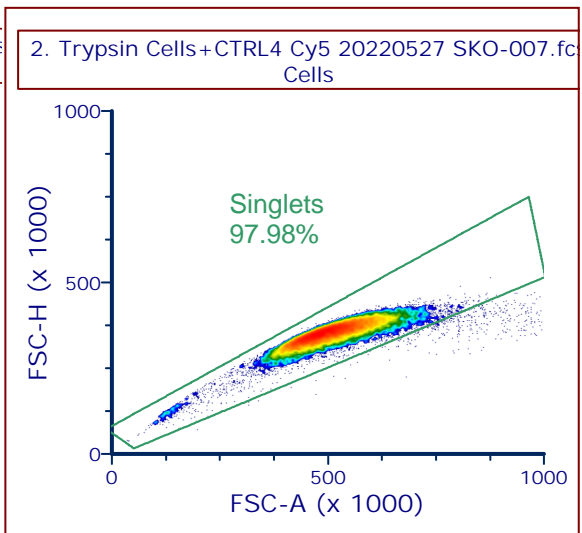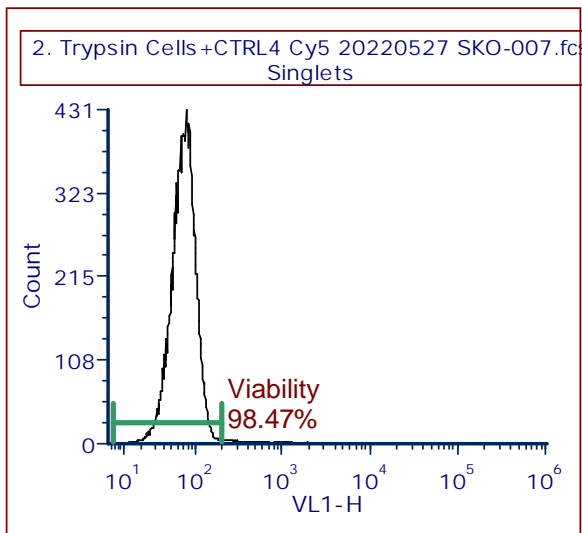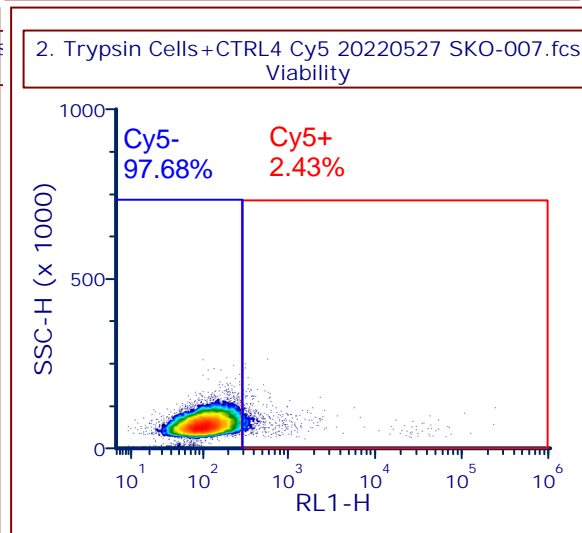

|    | A              | B          | C           | D              | E                | F |  |
|----|----------------|------------|-------------|----------------|------------------|---|--|
| 1  | Filename       | Gate       | # of Events | % of all cells | % of gated cells |   |  |
| 2  | 2. Trypsin Cel | All Events | 28736       | 100            | 100              |   |  |
| 3  | 2. Trypsin Cel | Cells      | 27922       | 97.17          | 97.17            |   |  |
| 4  | 2. Trypsin Cel | Singlets   | 27357       | 95.2           | 97.98            |   |  |
| 5  | 2. Trypsin Cel | Viability  | 26938       | 93.74          | 98.47            |   |  |
| 6  | 2. Trypsin Cel | Cy5+       | 655         | 2.28           | 2.43             |   |  |
| 7  | 2. Trypsin Cel | Cy5-       | 26312       | 91.56          | 97.68            |   |  |
| 8  |                |            |             |                |                  |   |  |
| 9  |                |            |             |                |                  |   |  |
| 10 |                |            |             |                |                  |   |  |

2. Trypsin Cells+MM1 Cy5 20220527 SKO-007.fcs  
No Gate

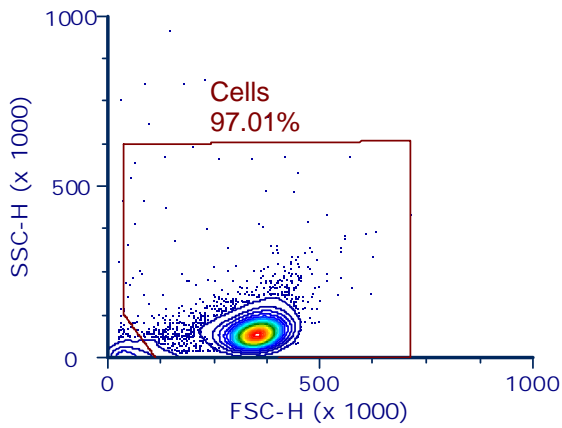

2. Trypsin Cells+MM1 Cy5 20220527 SKO-007.fcs  
Cells

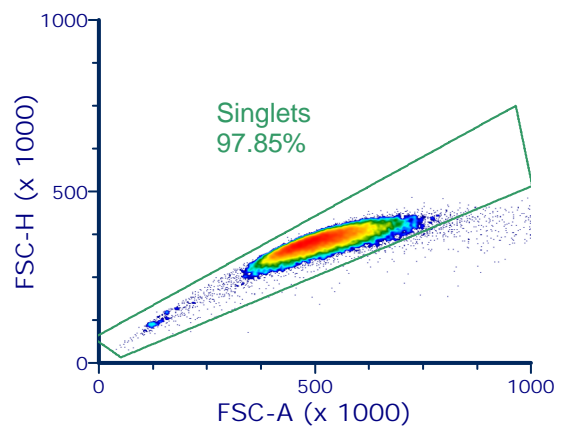

2. Trypsin Cells+MM1 Cy5 20220527 SKO-007.fcs  
Singlets

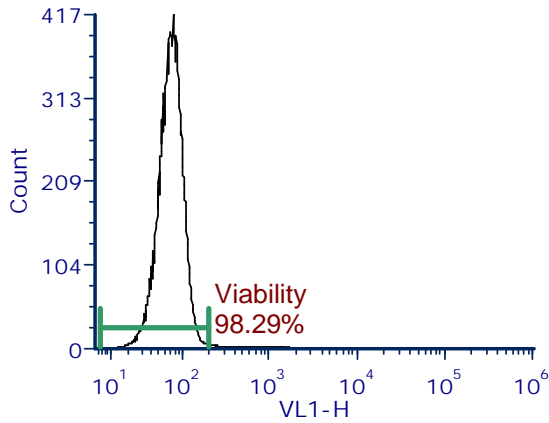

2. Trypsin Cells+MM1 Cy5 20220527 SKO-007.fcs  
Viability

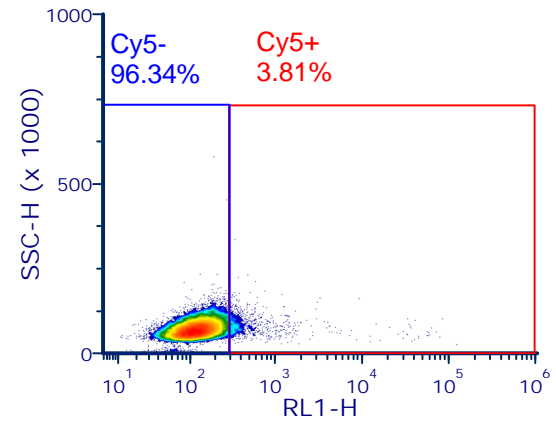

|    | A              | B          | C           | D              | E                | F |
|----|----------------|------------|-------------|----------------|------------------|---|
| 1  | Filename       | Gate       | # of Events | % of all cells | % of gated cells |   |
| 2  | 2. Trypsin Cel | All Events | 27919       | 100            | 100              |   |
| 3  | 2. Trypsin Cel | Cells      | 27083       | 97.01          | 97.01            |   |
| 4  | 2. Trypsin Cel | Singlets   | 26500       | 94.92          | 97.85            |   |
| 5  | 2. Trypsin Cel | Viability  | 26047       | 93.29          | 98.29            |   |
| 6  | 2. Trypsin Cel | Cy5+       | 993         | 3.56           | 3.81             |   |
| 7  | 2. Trypsin Cel | Cy5-       | 25093       | 89.88          | 96.34            |   |
| 8  |                |            |             |                |                  |   |
| 9  |                |            |             |                |                  |   |
| 10 |                |            |             |                |                  |   |

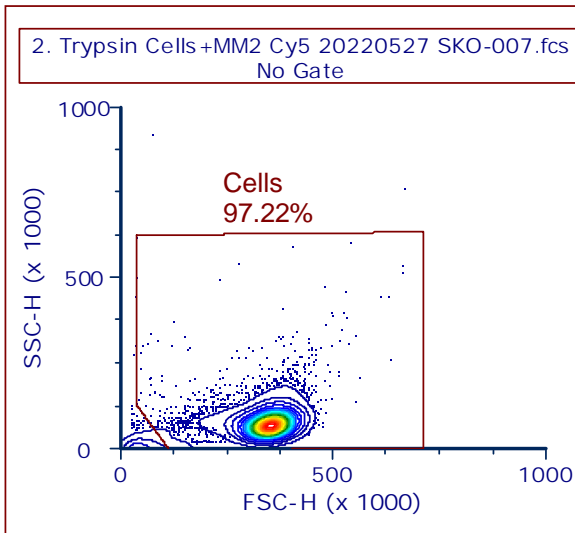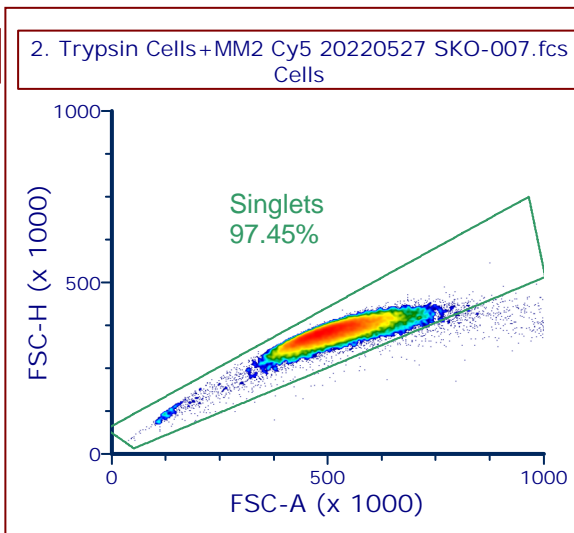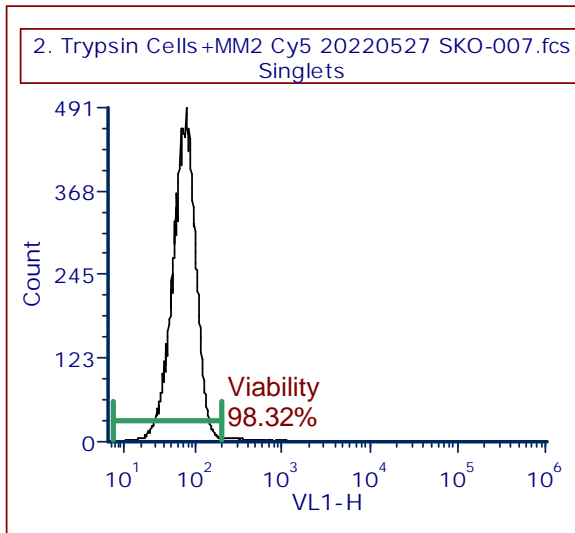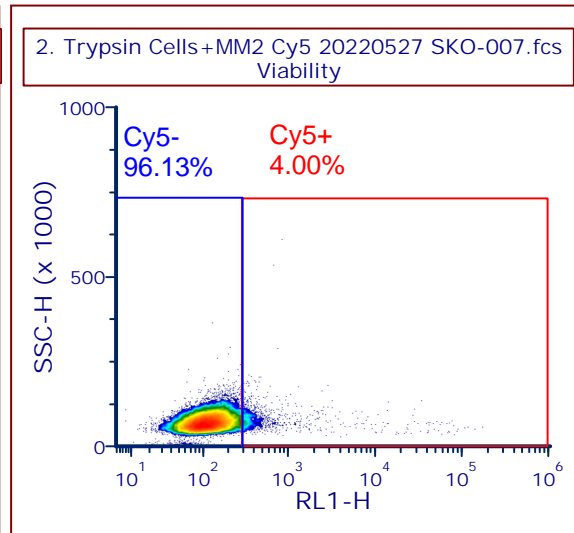

|    | A              | B          | C           | D              | E                | F |
|----|----------------|------------|-------------|----------------|------------------|---|
| 1  | Filename       | Gate       | # of Events | % of all cells | % of gated cells |   |
| 2  | 2. Trypsin Cel | All Events | 32535       | 100            | 100              |   |
| 3  | 2. Trypsin Cel | Cells      | 31630       | 97.22          | 97.22            |   |
| 4  | 2. Trypsin Cel | Singlets   | 30823       | 94.74          | 97.45            |   |
| 5  | 2. Trypsin Cel | Viability  | 30306       | 93.15          | 98.32            |   |
| 6  | 2. Trypsin Cel | Cy5+       | 1212        | 3.73           | 4                |   |
| 7  | 2. Trypsin Cel | Cy5-       | 29132       | 89.54          | 96.13            |   |
| 8  |                |            |             |                |                  |   |
| 9  |                |            |             |                |                  |   |
| 10 |                |            |             |                |                  |   |

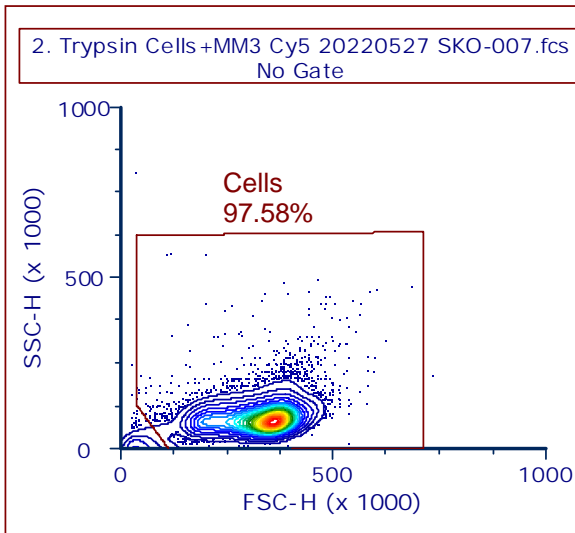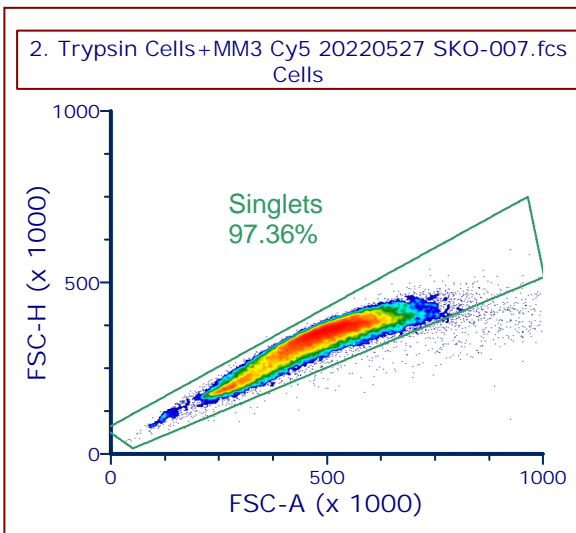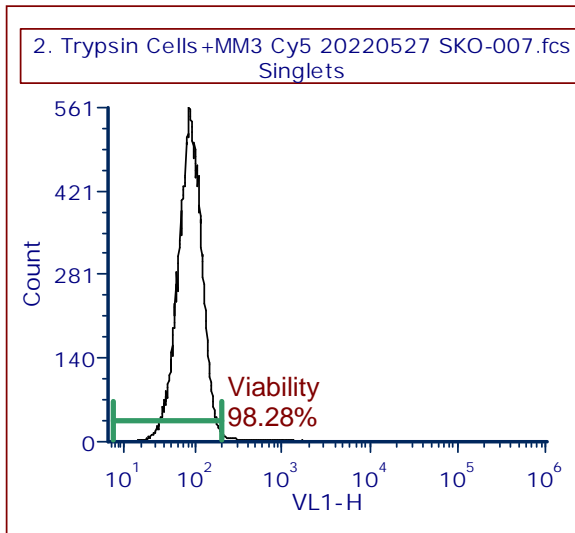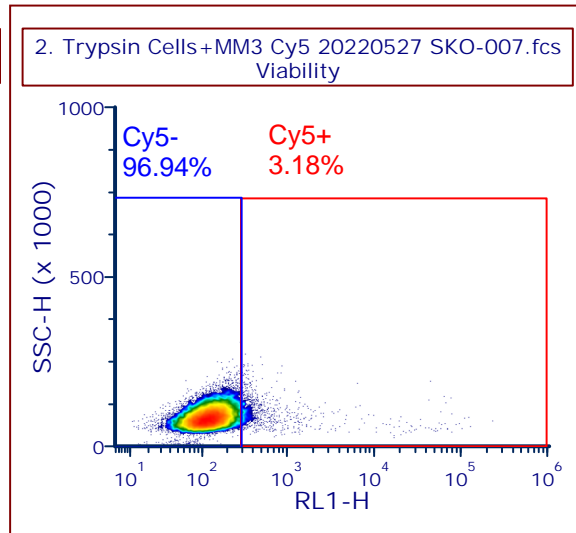

|    | A              | B          | C           | D              | E                | F |  |
|----|----------------|------------|-------------|----------------|------------------|---|--|
| 1  | Filename       | Gate       | # of Events | % of all cells | % of gated cells |   |  |
| 2  | 2. Trypsin Cel | All Events | 38305       | 100            | 100              |   |  |
| 3  | 2. Trypsin Cel | Cells      | 37379       | 97.58          | 97.58            |   |  |
| 4  | 2. Trypsin Cel | Singlets   | 36394       | 95.01          | 97.36            |   |  |
| 5  | 2. Trypsin Cel | Viability  | 35767       | 93.37          | 98.28            |   |  |
| 6  | 2. Trypsin Cel | Cy5+       | 1137        | 2.97           | 3.18             |   |  |
| 7  | 2. Trypsin Cel | Cy5-       | 34674       | 90.52          | 96.94            |   |  |
| 8  |                |            |             |                |                  |   |  |
| 9  |                |            |             |                |                  |   |  |
| 10 |                |            |             |                |                  |   |  |

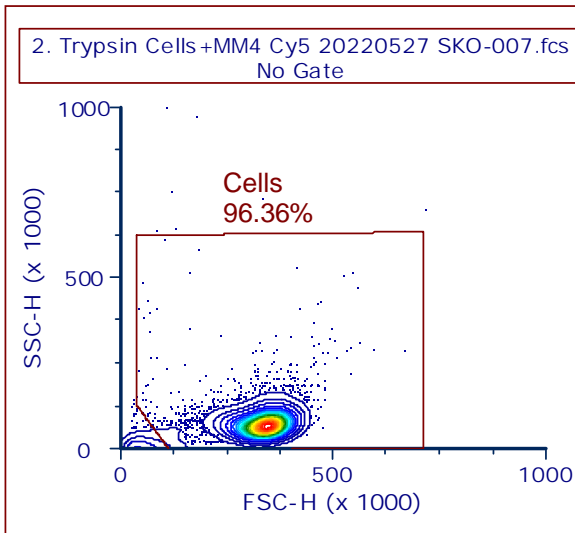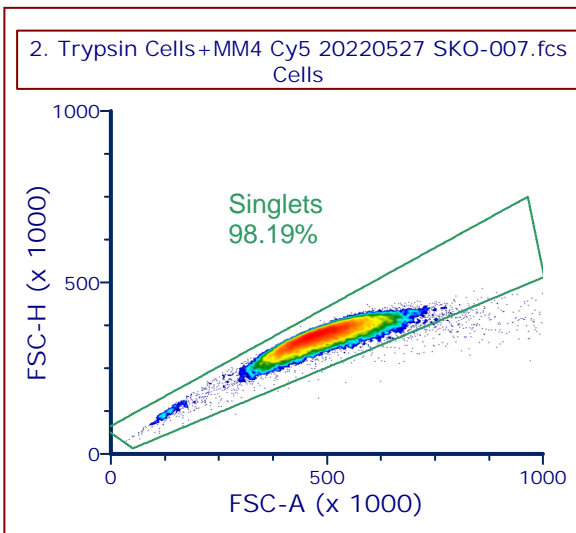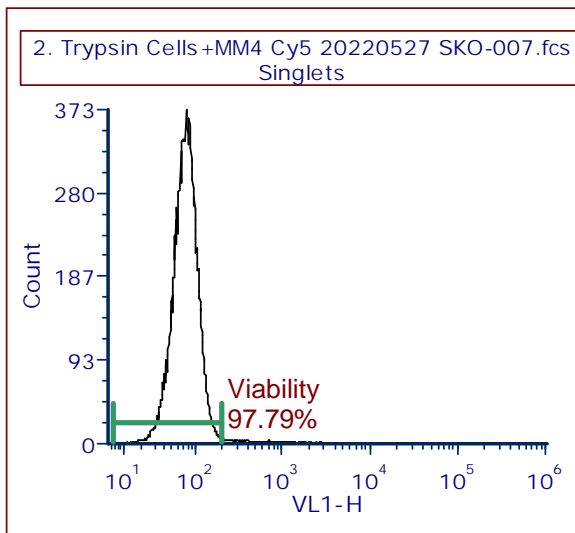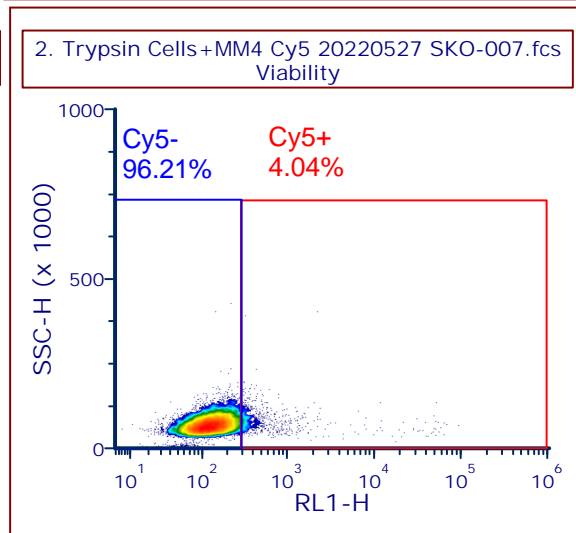

|    | A              | B          | C           | D              | E                | F |  |
|----|----------------|------------|-------------|----------------|------------------|---|--|
| 1  | Filename       | Gate       | # of Events | % of all cells | % of gated cells |   |  |
| 2  | 2. Trypsin Cel | All Events | 25498       | 100            | 100              |   |  |
| 3  | 2. Trypsin Cel | Cells      | 24569       | 96.36          | 96.36            |   |  |
| 4  | 2. Trypsin Cel | Singlets   | 24124       | 94.61          | 98.19            |   |  |
| 5  | 2. Trypsin Cel | Viability  | 23590       | 92.52          | 97.79            |   |  |
| 6  | 2. Trypsin Cel | Cy5+       | 952         | 3.73           | 4.04             |   |  |
| 7  | 2. Trypsin Cel | Cy5-       | 22696       | 89.01          | 96.21            |   |  |
| 8  |                |            |             |                |                  |   |  |
| 9  |                |            |             |                |                  |   |  |
| 10 |                |            |             |                |                  |   |  |

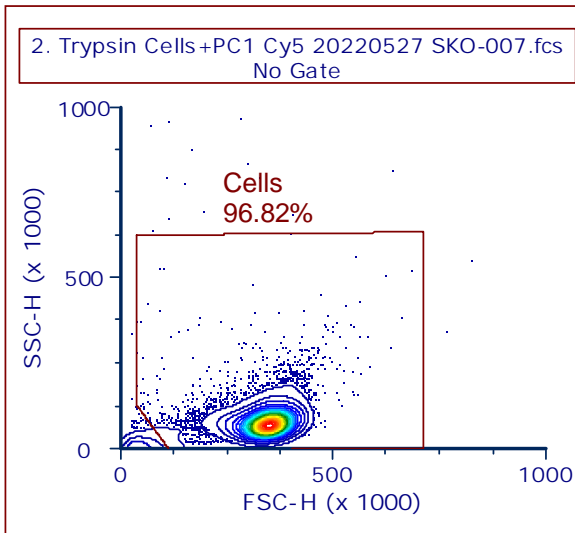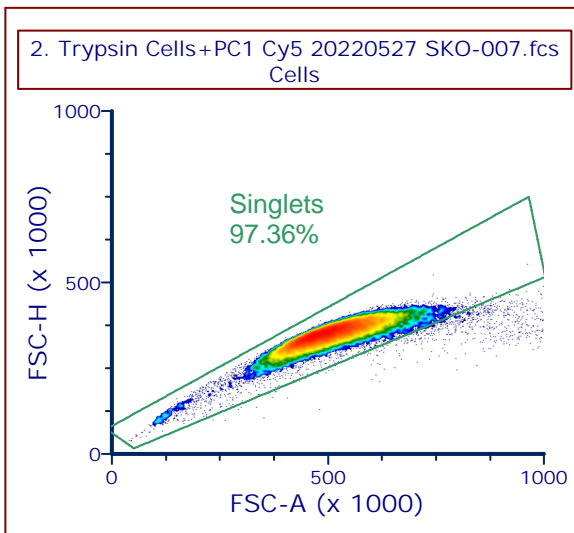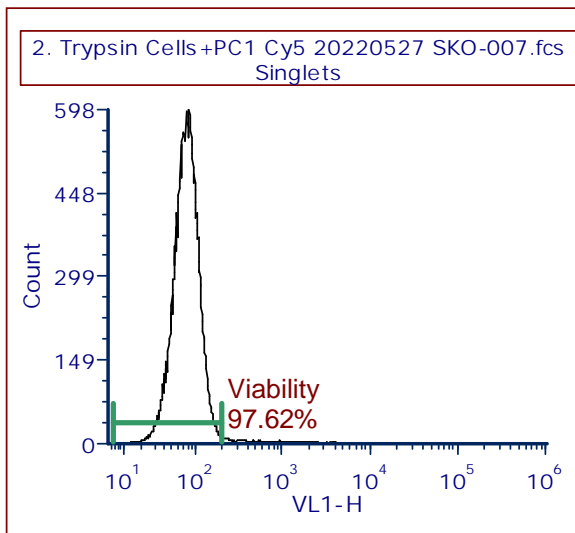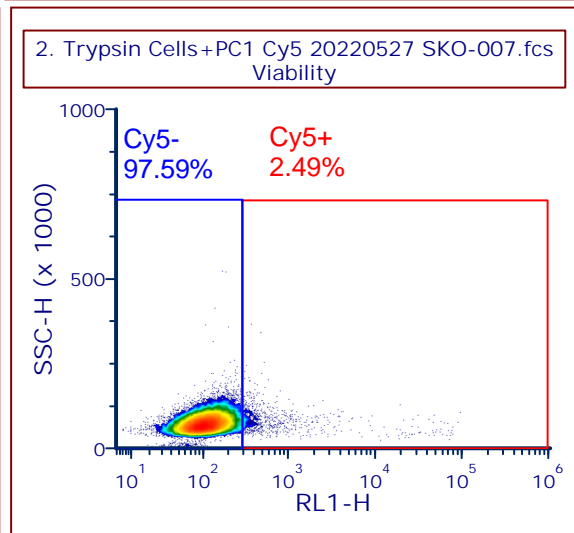

|    | A              | B          | C           | D              | E                | F |  |
|----|----------------|------------|-------------|----------------|------------------|---|--|
| 1  | Filename       | Gate       | # of Events | % of all cells | % of gated cells |   |  |
| 2  | 2. Trypsin Cel | All Events | 43253       | 100            | 100              |   |  |
| 3  | 2. Trypsin Cel | Cells      | 41878       | 96.82          | 96.82            |   |  |
| 4  | 2. Trypsin Cel | Singlets   | 40771       | 94.26          | 97.36            |   |  |
| 5  | 2. Trypsin Cel | Viability  | 39802       | 92.02          | 97.62            |   |  |
| 6  | 2. Trypsin Cel | Cy5+       | 993         | 2.3            | 2.49             |   |  |
| 7  | 2. Trypsin Cel | Cy5-       | 38843       | 89.8           | 97.59            |   |  |
| 8  |                |            |             |                |                  |   |  |
| 9  |                |            |             |                |                  |   |  |
| 10 |                |            |             |                |                  |   |  |

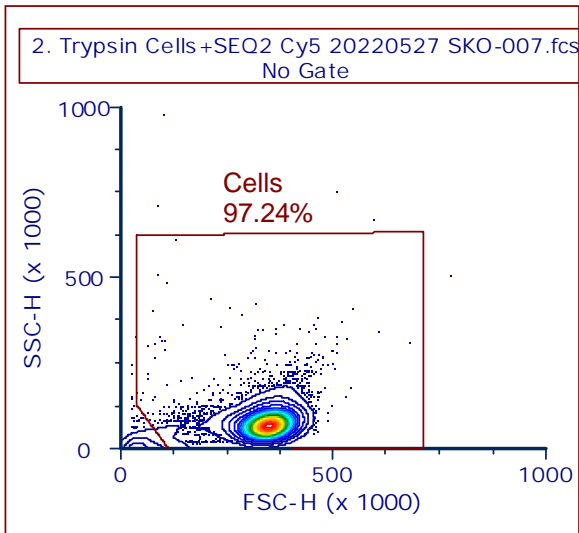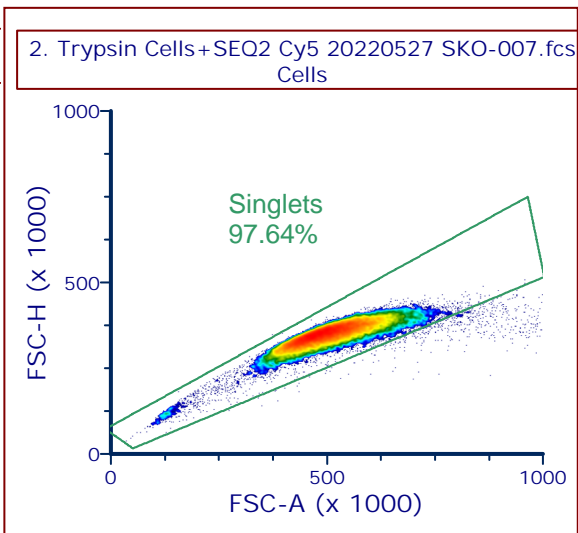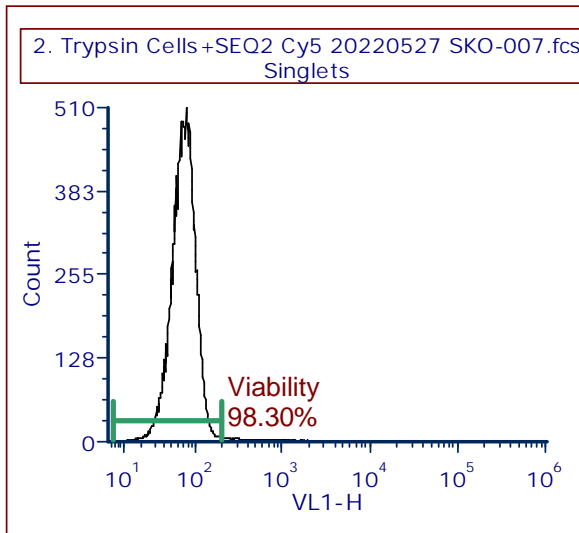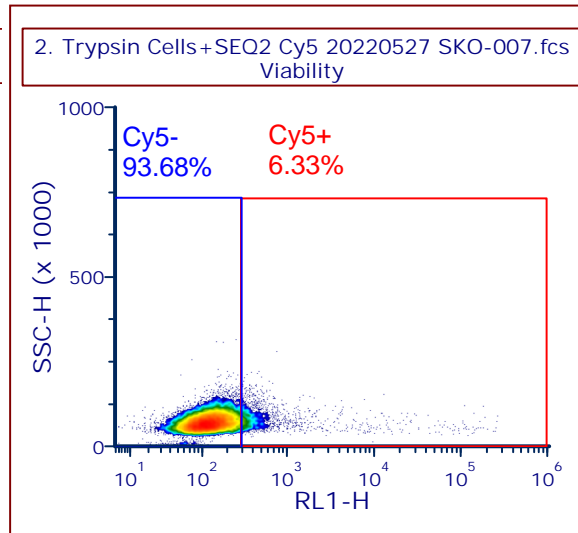

|    | A              | B          | C           | D              | E                | F |  |
|----|----------------|------------|-------------|----------------|------------------|---|--|
| 1  | Filename       | Gate       | # of Events | % of all cells | % of gated cells |   |  |
| 2  | 2. Trypsin Cel | All Events | 34527       | 100            | 100              |   |  |
| 3  | 2. Trypsin Cel | Cells      | 33575       | 97.24          | 97.24            |   |  |
| 4  | 2. Trypsin Cel | Singlets   | 32783       | 94.95          | 97.64            |   |  |
| 5  | 2. Trypsin Cel | Viability  | 32226       | 93.34          | 98.3             |   |  |
| 6  | 2. Trypsin Cel | Cy5+       | 2039        | 5.91           | 6.33             |   |  |
| 7  | 2. Trypsin Cel | Cy5-       | 30188       | 87.43          | 93.68            |   |  |
| 8  |                |            |             |                |                  |   |  |
| 9  |                |            |             |                |                  |   |  |
| 10 |                |            |             |                |                  |   |  |



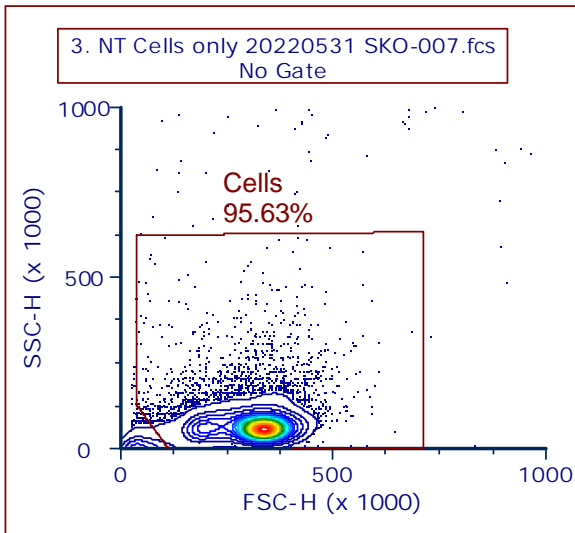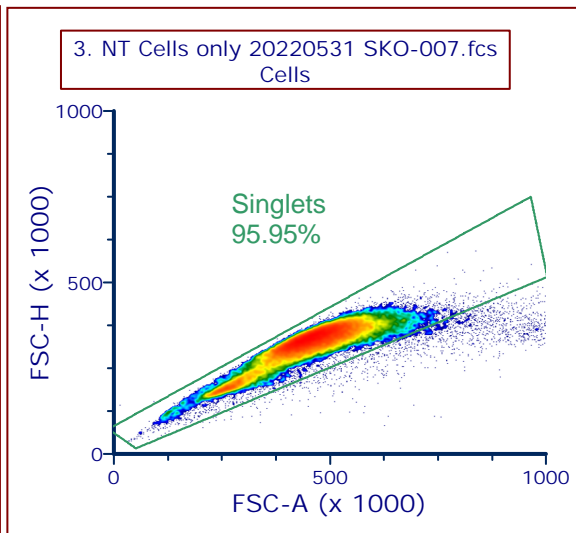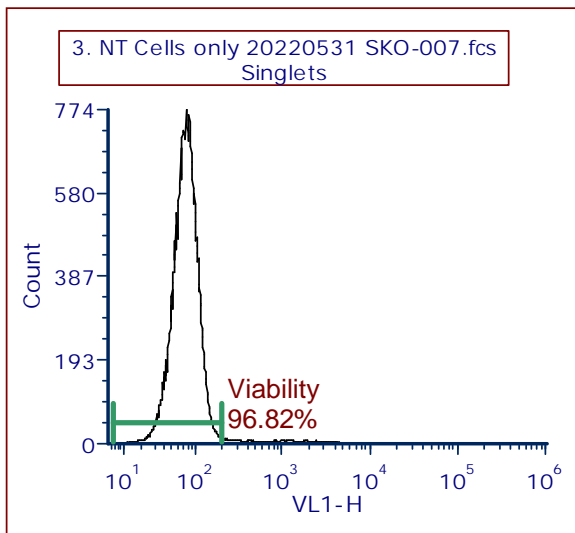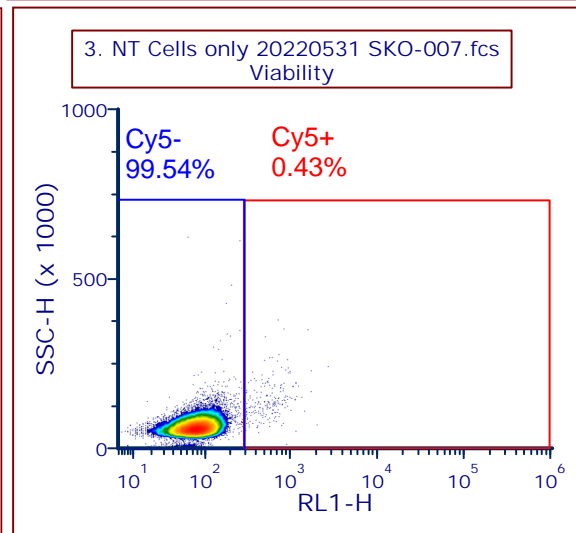

|    | A              | B          | C           | D              | E                | F |  |
|----|----------------|------------|-------------|----------------|------------------|---|--|
| 1  | Filename       | Gate       | # of Events | % of all cells | % of gated cells |   |  |
| 2  | 3. NT Cells or | All Events | 55865       | 100            | 100              |   |  |
| 3  | 3. NT Cells or | Cells      | 53421       | 95.63          | 95.63            |   |  |
| 4  | 3. NT Cells or | Singlets   | 51257       | 91.75          | 95.95            |   |  |
| 5  | 3. NT Cells or | Viability  | 49629       | 88.84          | 96.82            |   |  |
| 6  | 3. NT Cells or | Cy5+       | 212         | 0.38           | 0.43             |   |  |
| 7  | 3. NT Cells or | Cy5-       | 49400       | 88.43          | 99.54            |   |  |
| 8  |                |            |             |                |                  |   |  |
| 9  |                |            |             |                |                  |   |  |
| 10 |                |            |             |                |                  |   |  |

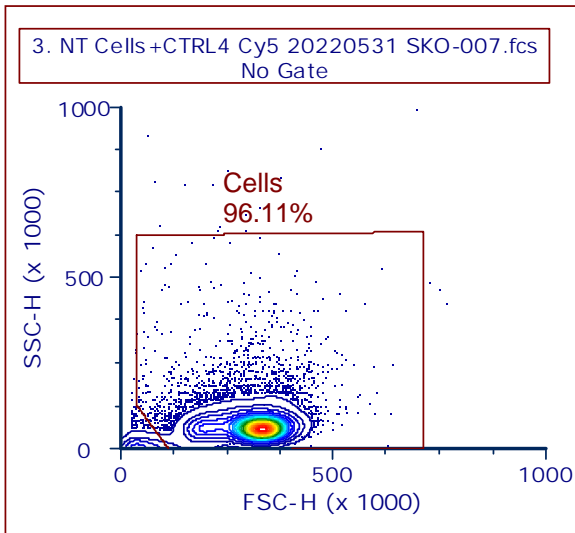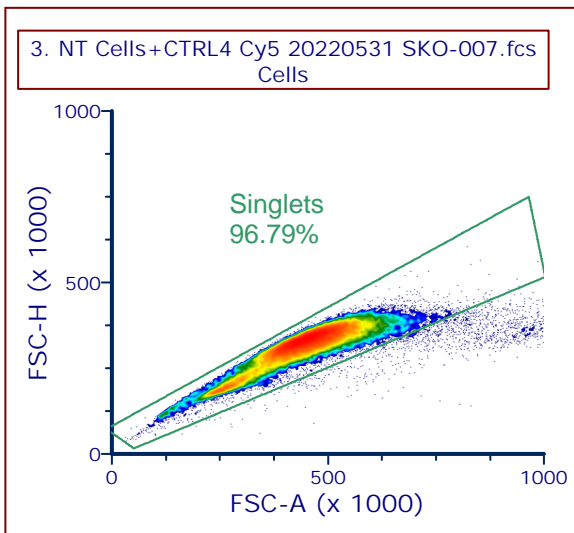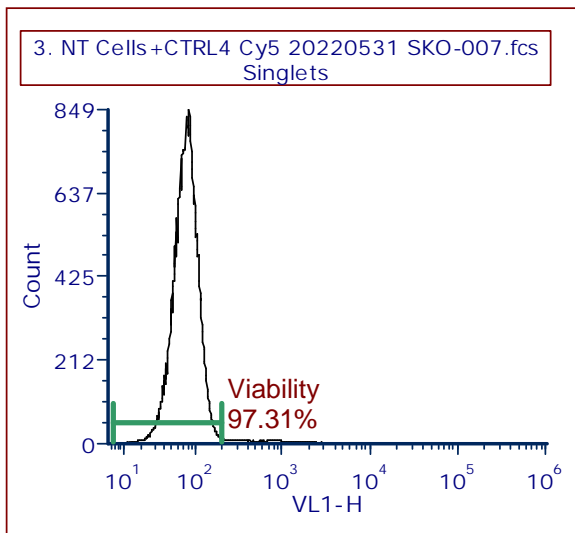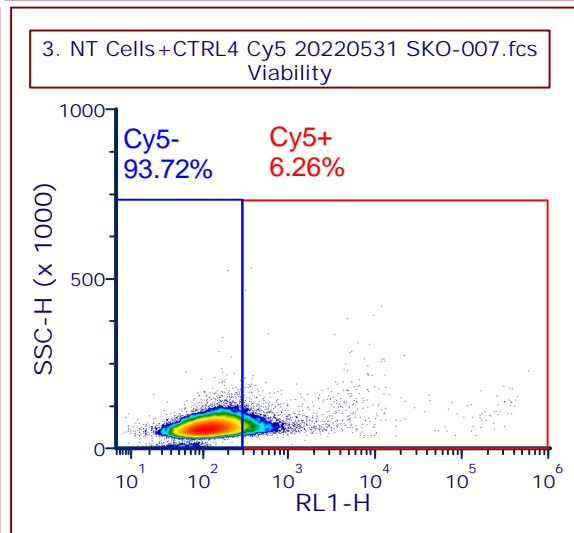

|    | A             | B          | C           | D              | E                | F |  |
|----|---------------|------------|-------------|----------------|------------------|---|--|
| 1  | Filename      | Gate       | # of Events | % of all cells | % of gated cells |   |  |
| 2  | 3. NT Cells+C | All Events | 59595       | 100            | 100              |   |  |
| 3  | 3. NT Cells+C | Cells      | 57279       | 96.11          | 96.11            |   |  |
| 4  | 3. NT Cells+C | Singlets   | 55440       | 93.03          | 96.79            |   |  |
| 5  | 3. NT Cells+C | Viability  | 53949       | 90.53          | 97.31            |   |  |
| 6  | 3. NT Cells+C | Cy5+       | 3376        | 5.66           | 6.26             |   |  |
| 7  | 3. NT Cells+C | Cy5-       | 50562       | 84.84          | 93.72            |   |  |
| 8  |               |            |             |                |                  |   |  |
| 9  |               |            |             |                |                  |   |  |
| 10 |               |            |             |                |                  |   |  |

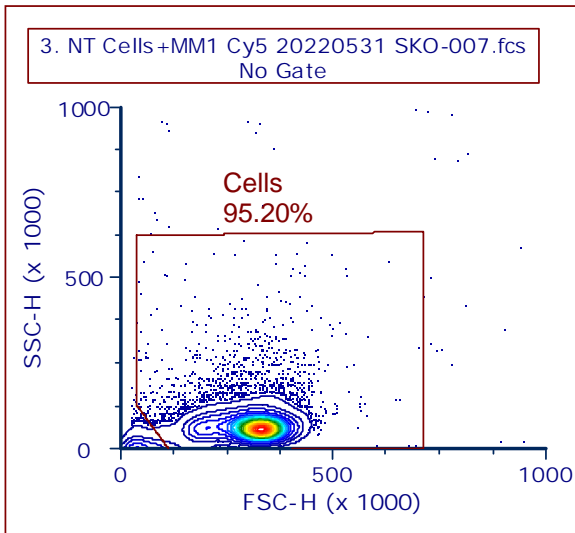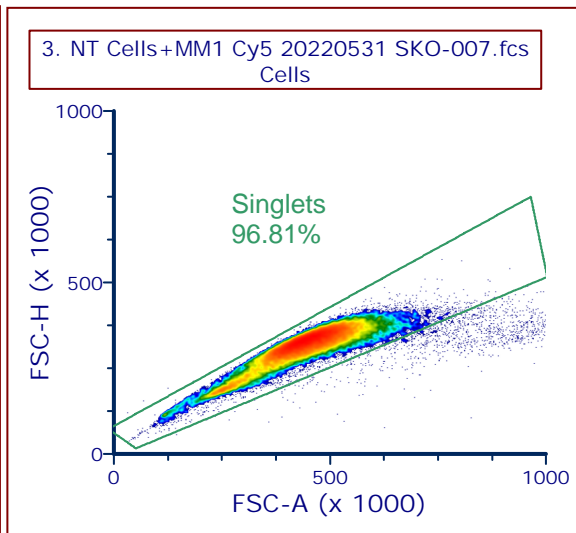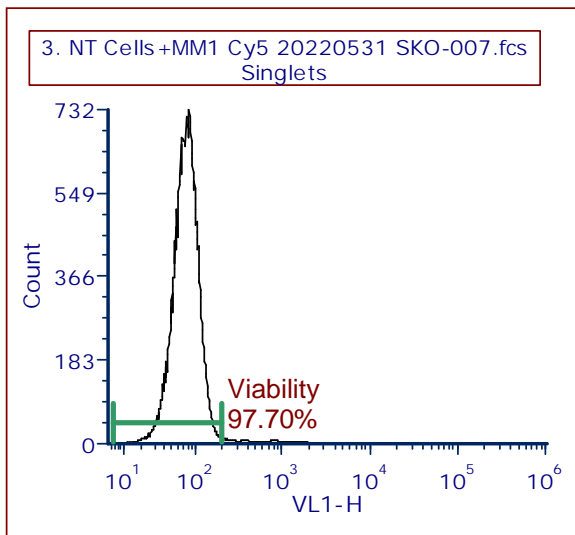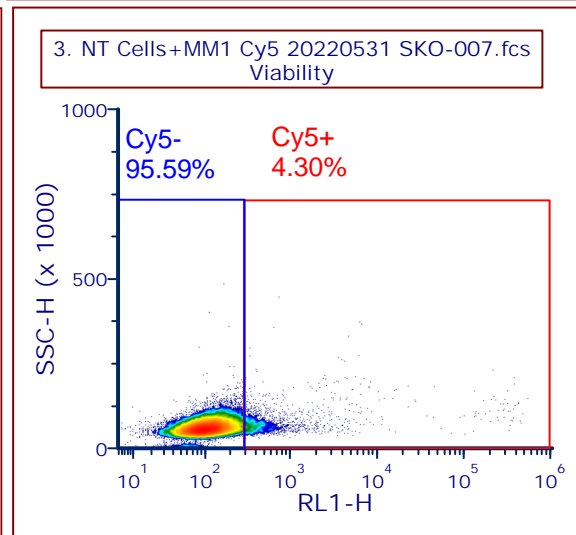

|    | A             | B          | C           | D              | E                | F |  |
|----|---------------|------------|-------------|----------------|------------------|---|--|
| 1  | Filename      | Gate       | # of Events | % of all cells | % of gated cells |   |  |
| 2  | 3. NT Cells+M | All Events | 53215       | 100            | 100              |   |  |
| 3  | 3. NT Cells+M | Cells      | 50661       | 95.2           | 95.2             |   |  |
| 4  | 3. NT Cells+M | Singlets   | 49044       | 92.16          | 96.81            |   |  |
| 5  | 3. NT Cells+M | Viability  | 47918       | 90.05          | 97.7             |   |  |
| 6  | 3. NT Cells+M | Cy5+       | 2059        | 3.87           | 4.3              |   |  |
| 7  | 3. NT Cells+M | Cy5-       | 45807       | 86.08          | 95.59            |   |  |
| 8  |               |            |             |                |                  |   |  |
| 9  |               |            |             |                |                  |   |  |
| 10 |               |            |             |                |                  |   |  |

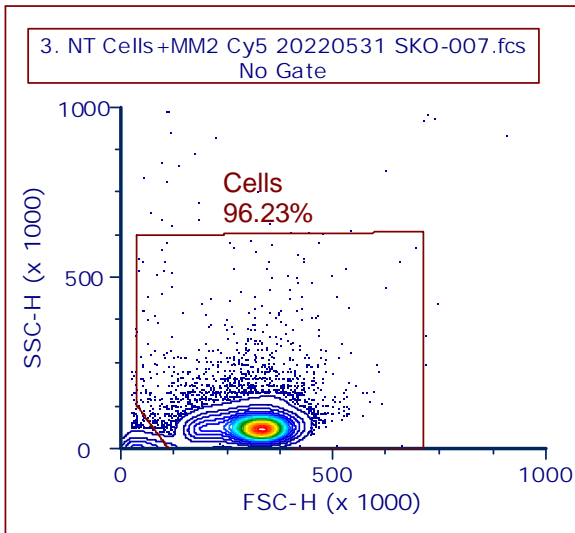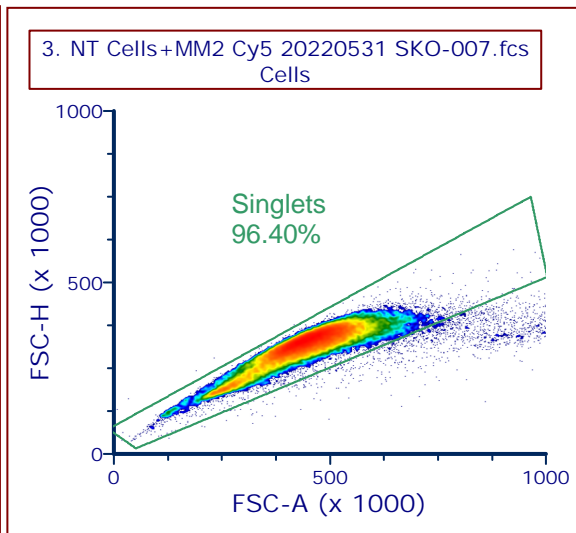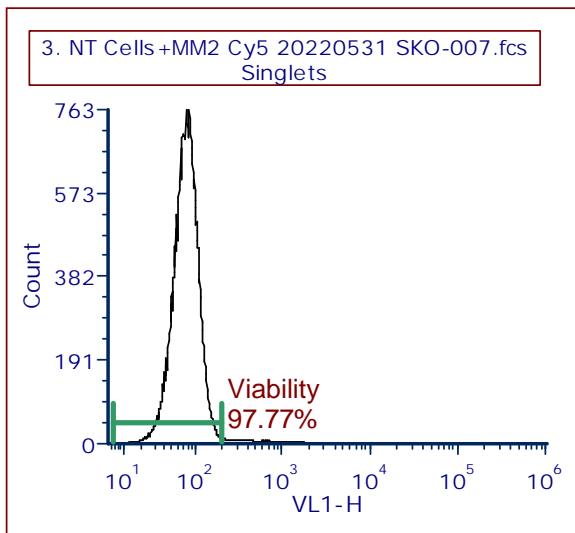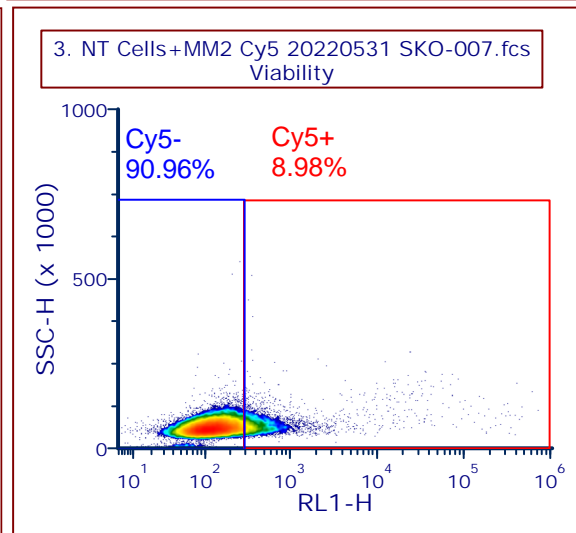

|    | A             | B          | C           | D              | E                | F |  |
|----|---------------|------------|-------------|----------------|------------------|---|--|
| 1  | Filename      | Gate       | # of Events | % of all cells | % of gated cells |   |  |
| 2  | 3. NT Cells+M | All Events | 55157       | 100            | 100              |   |  |
| 3  | 3. NT Cells+M | Cells      | 53076       | 96.23          | 96.23            |   |  |
| 4  | 3. NT Cells+M | Singlets   | 51166       | 92.76          | 96.4             |   |  |
| 5  | 3. NT Cells+M | Viability  | 50023       | 90.69          | 97.77            |   |  |
| 6  | 3. NT Cells+M | Cy5+       | 4493        | 8.15           | 8.98             |   |  |
| 7  | 3. NT Cells+M | Cy5-       | 45500       | 82.49          | 90.96            |   |  |
| 8  |               |            |             |                |                  |   |  |
| 9  |               |            |             |                |                  |   |  |
| 10 |               |            |             |                |                  |   |  |

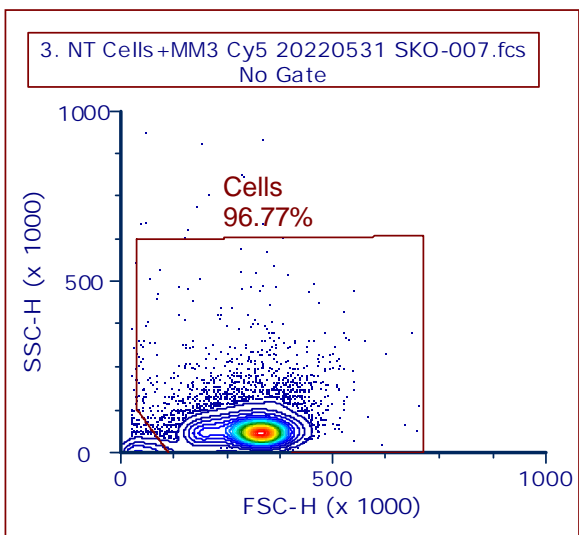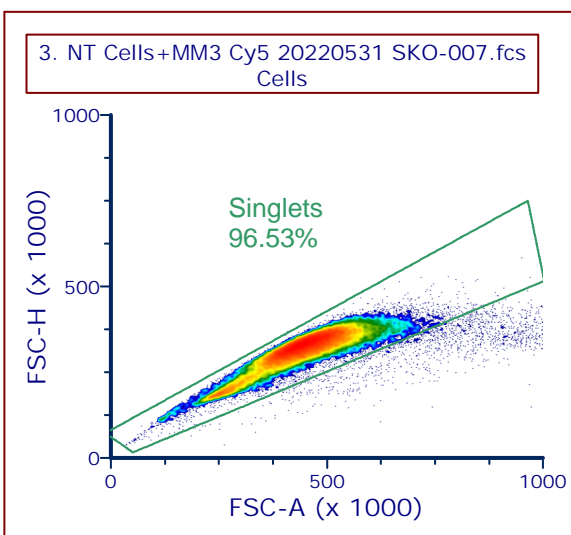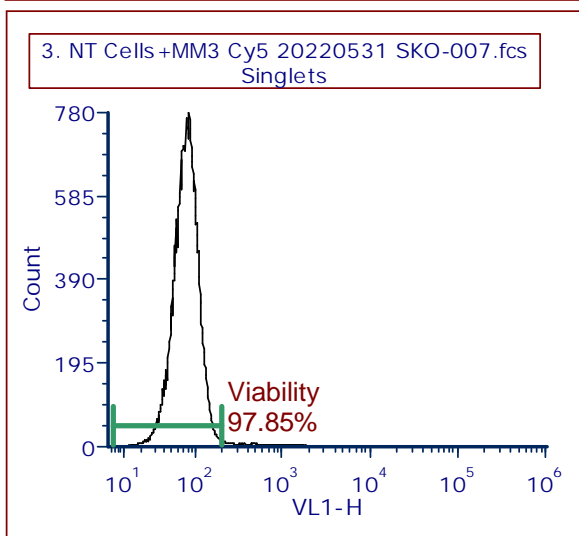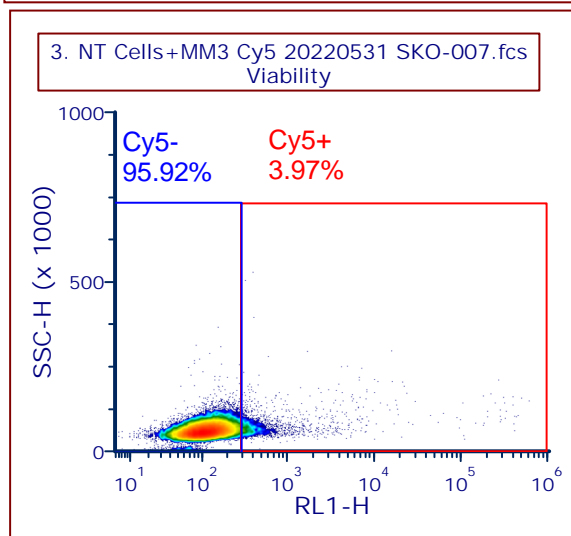

|    | A             | B          | C           | D              | E                | F |  |
|----|---------------|------------|-------------|----------------|------------------|---|--|
| 1  | Filename      | Gate       | # of Events | % of all cells | % of gated cells |   |  |
| 2  | 3. NT Cells+M | All Events | 55238       | 100            | 100              |   |  |
| 3  | 3. NT Cells+M | Cells      | 53454       | 96.77          | 96.77            |   |  |
| 4  | 3. NT Cells+M | Singlets   | 51597       | 93.41          | 96.53            |   |  |
| 5  | 3. NT Cells+M | Viability  | 50490       | 91.4           | 97.85            |   |  |
| 6  | 3. NT Cells+M | Cy5+       | 2003        | 3.63           | 3.97             |   |  |
| 7  | 3. NT Cells+M | Cy5-       | 48432       | 87.68          | 95.92            |   |  |
| 8  |               |            |             |                |                  |   |  |
| 9  |               |            |             |                |                  |   |  |
| 10 |               |            |             |                |                  |   |  |

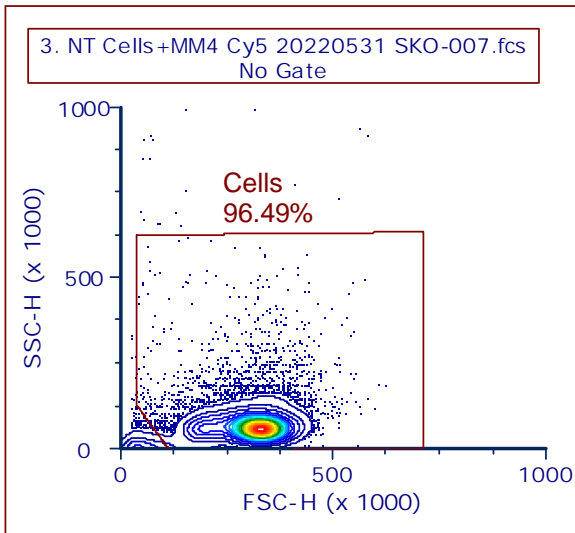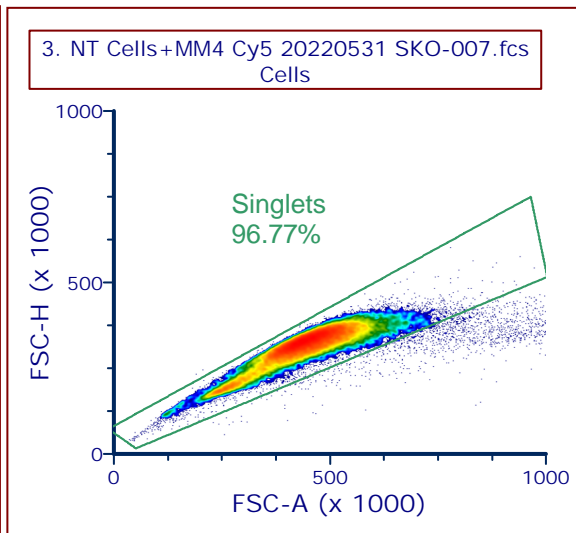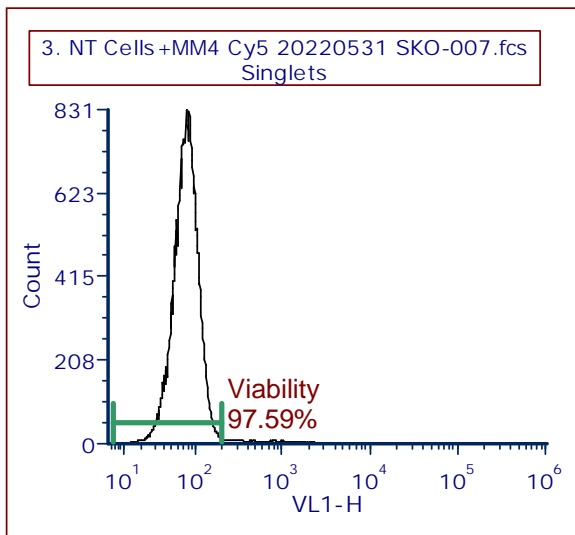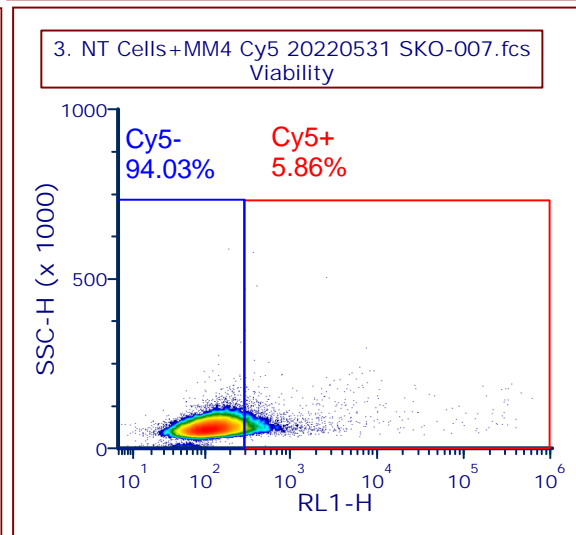

|    | A             | B          | C           | D              | E                | F |  |
|----|---------------|------------|-------------|----------------|------------------|---|--|
| 1  | Filename      | Gate       | # of Events | % of all cells | % of gated cells |   |  |
| 2  | 3. NT Cells+M | All Events | 58695       | 100            | 100              |   |  |
| 3  | 3. NT Cells+M | Cells      | 56635       | 96.49          | 96.49            |   |  |
| 4  | 3. NT Cells+M | Singlets   | 54807       | 93.38          | 96.77            |   |  |
| 5  | 3. NT Cells+M | Viability  | 53487       | 91.13          | 97.59            |   |  |
| 6  | 3. NT Cells+M | Cy5+       | 3134        | 5.34           | 5.86             |   |  |
| 7  | 3. NT Cells+M | Cy5-       | 50296       | 85.69          | 94.03            |   |  |
| 8  |               |            |             |                |                  |   |  |
| 9  |               |            |             |                |                  |   |  |
| 10 |               |            |             |                |                  |   |  |

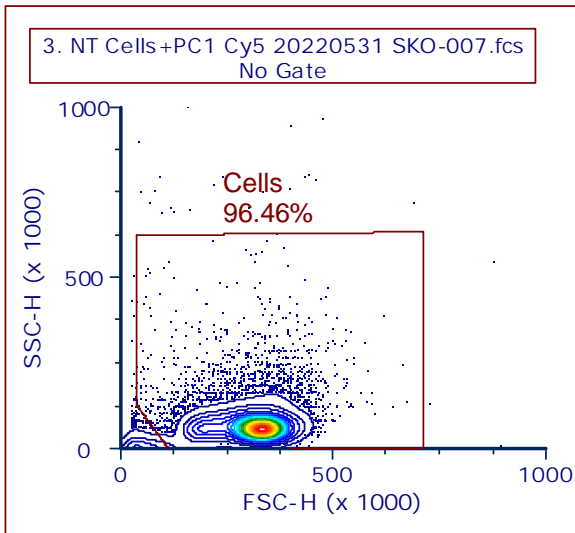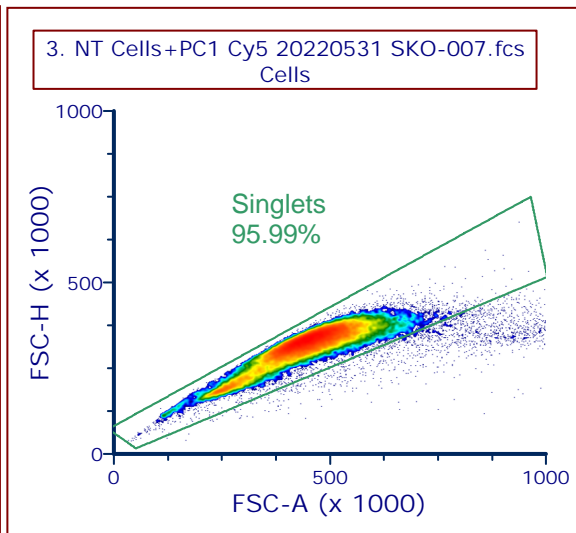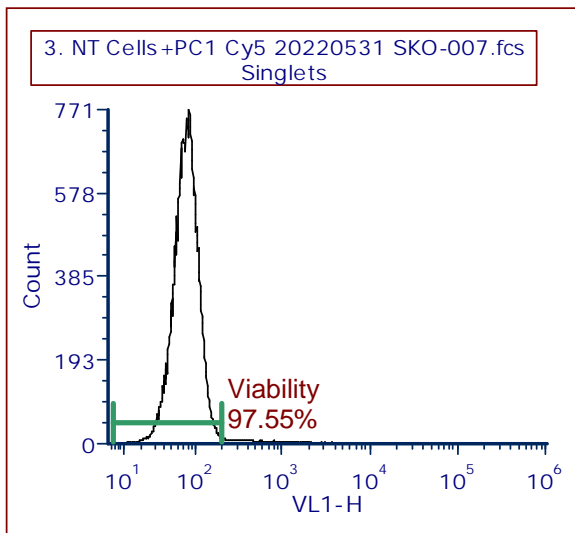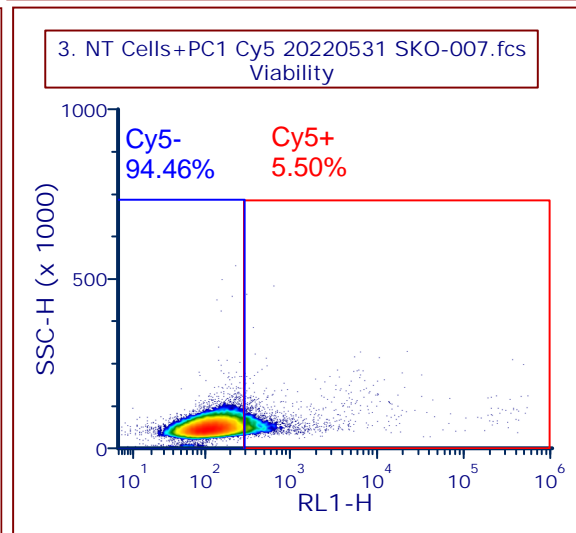

|    | A               | B          | C           | D              | E                | F |  |
|----|-----------------|------------|-------------|----------------|------------------|---|--|
| 1  | Filename        | Gate       | # of Events | % of all cells | % of gated cells |   |  |
| 2  | 3. NT Cells+PC1 | All Events | 55358       | 100            | 100              |   |  |
| 3  | 3. NT Cells+PC1 | Cells      | 53396       | 96.46          | 96.46            |   |  |
| 4  | 3. NT Cells+PC1 | Singlets   | 51257       | 92.59          | 95.99            |   |  |
| 5  | 3. NT Cells+PC1 | Viability  | 50000       | 90.32          | 97.55            |   |  |
| 6  | 3. NT Cells+PC1 | Cy5+       | 2751        | 4.97           | 5.5              |   |  |
| 7  | 3. NT Cells+PC1 | Cy5-       | 47230       | 85.32          | 94.46            |   |  |
| 8  |                 |            |             |                |                  |   |  |
| 9  |                 |            |             |                |                  |   |  |
| 10 |                 |            |             |                |                  |   |  |

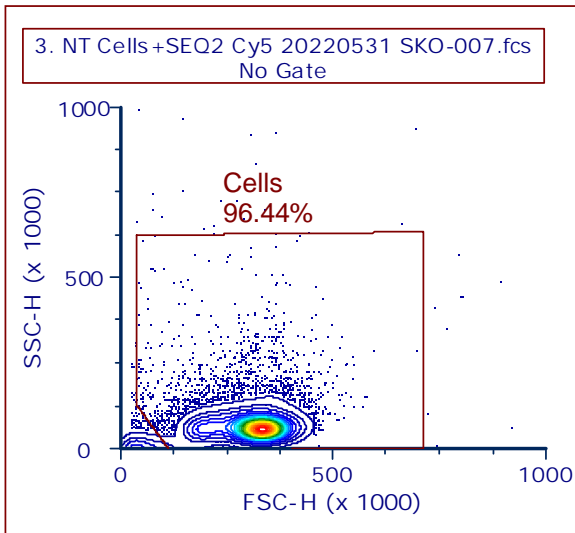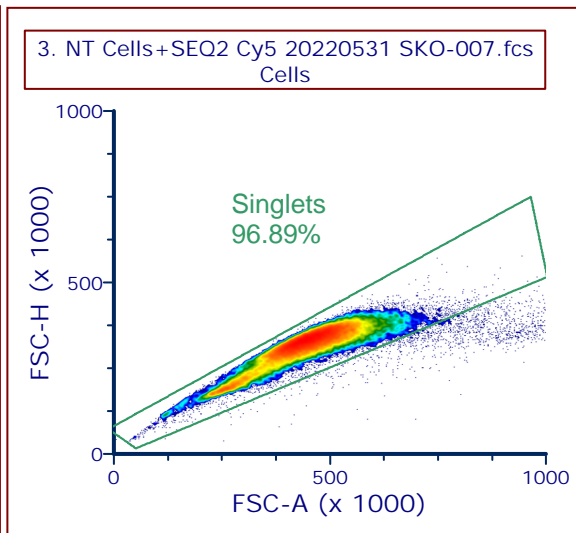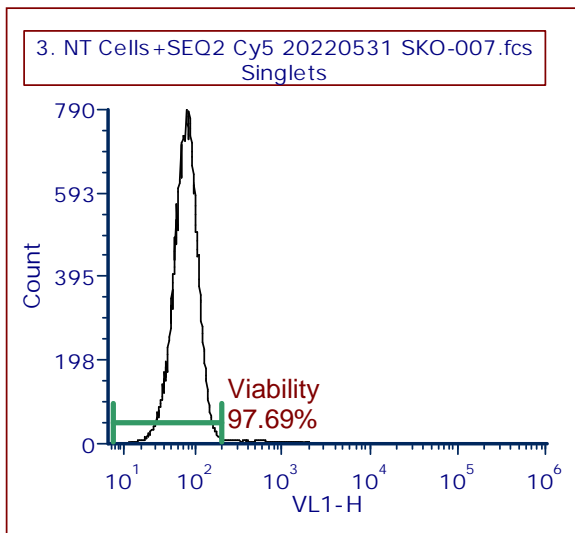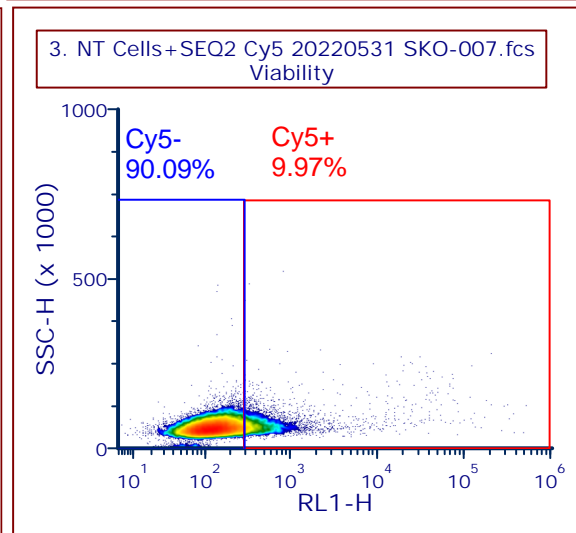

|    | A              | B          | C           | D              | E                | F |  |
|----|----------------|------------|-------------|----------------|------------------|---|--|
| 1  | Filename       | Gate       | # of Events | % of all cells | % of gated cells |   |  |
| 2  | 3. NT Cells+SI | All Events | 56416       | 100            | 100              |   |  |
| 3  | 3. NT Cells+SI | Cells      | 54410       | 96.44          | 96.44            |   |  |
| 4  | 3. NT Cells+SI | Singlets   | 52720       | 93.45          | 96.89            |   |  |
| 5  | 3. NT Cells+SI | Viability  | 51503       | 91.29          | 97.69            |   |  |
| 6  | 3. NT Cells+SI | Cy5+       | 5133        | 9.1            | 9.97             |   |  |
| 7  | 3. NT Cells+SI | Cy5-       | 46398       | 82.24          | 90.09            |   |  |
| 8  |                |            |             |                |                  |   |  |
| 9  |                |            |             |                |                  |   |  |
| 10 |                |            |             |                |                  |   |  |



3. Trypsin Cells only 20220531 SKO-007.fcs  
No Gate

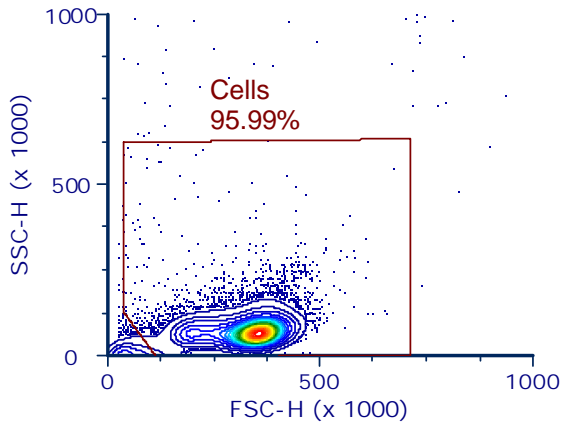

3. Trypsin Cells only 20220531 SKO-007.fcs  
Cells

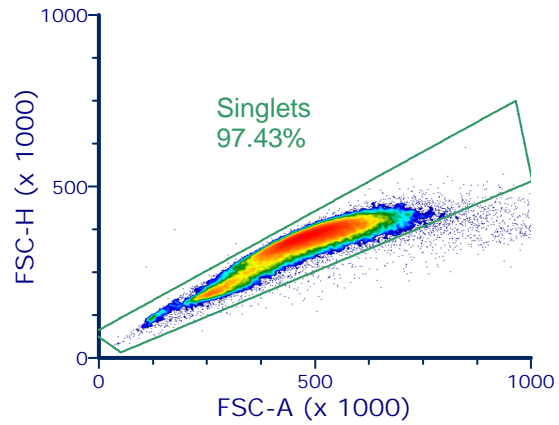

3. Trypsin Cells only 20220531 SKO-007.fcs  
Singlets

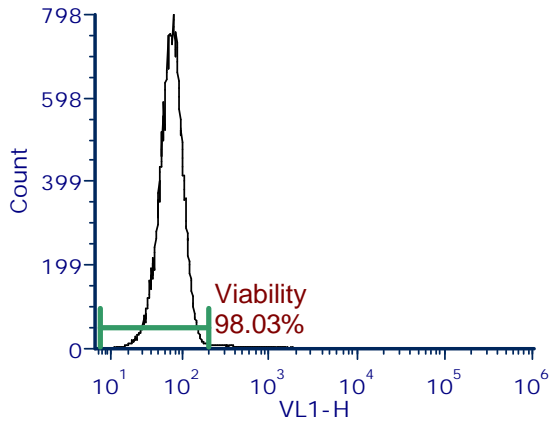

3. Trypsin Cells only 20220531 SKO-007.fcs  
Viability

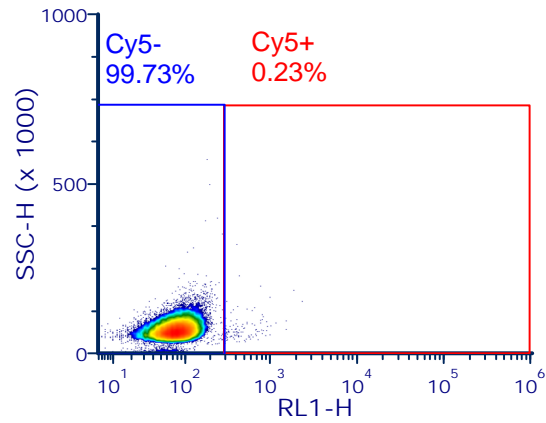

|    | A              | B          | C           | D              | E                | F |  |
|----|----------------|------------|-------------|----------------|------------------|---|--|
| 1  | Filename       | Gate       | # of Events | % of all cells | % of gated cells |   |  |
| 2  | 3. Trypsin Cel | All Events | 54201       | 100            | 100              |   |  |
| 3  | 3. Trypsin Cel | Cells      | 52025       | 95.99          | 95.99            |   |  |
| 4  | 3. Trypsin Cel | Singlets   | 50690       | 93.52          | 97.43            |   |  |
| 5  | 3. Trypsin Cel | Viability  | 49692       | 91.68          | 98.03            |   |  |
| 6  | 3. Trypsin Cel | Cy5+       | 115         | 0.21           | 0.23             |   |  |
| 7  | 3. Trypsin Cel | Cy5-       | 49559       | 91.44          | 99.73            |   |  |
| 8  |                |            |             |                |                  |   |  |
| 9  |                |            |             |                |                  |   |  |
| 10 |                |            |             |                |                  |   |  |

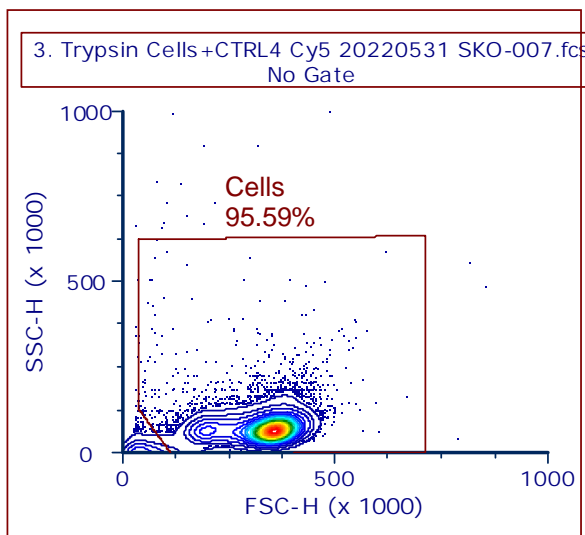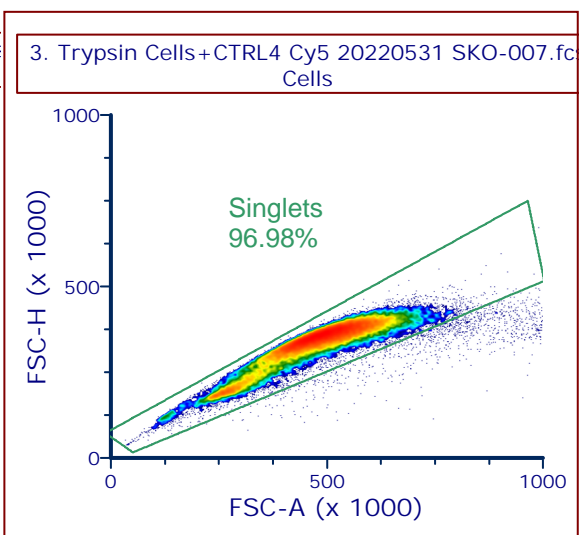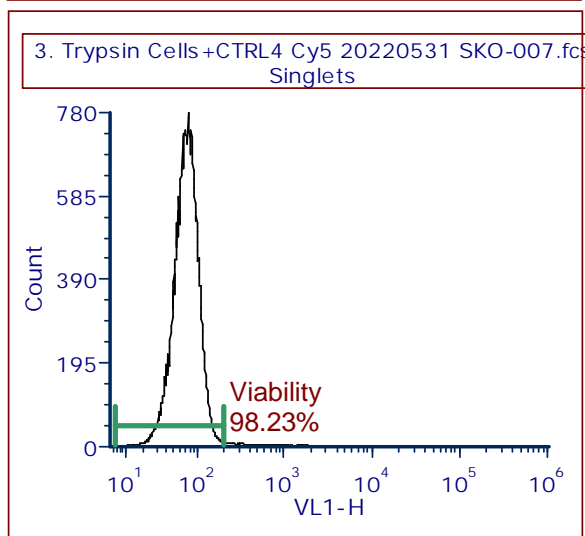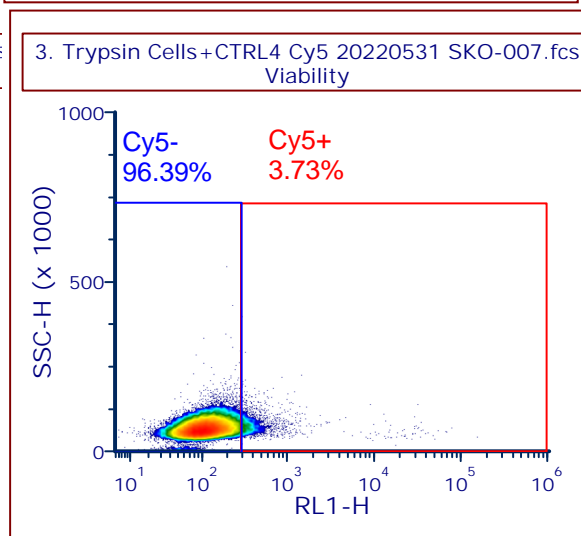

|    | A              | B          | C           | D              | E                | F |  |
|----|----------------|------------|-------------|----------------|------------------|---|--|
| 1  | Filename       | Gate       | # of Events | % of all cells | % of gated cells |   |  |
| 2  | 3. Trypsin Cel | All Events | 54684       | 100            | 100              |   |  |
| 3  | 3. Trypsin Cel | Cells      | 52270       | 95.59          | 95.59            |   |  |
| 4  | 3. Trypsin Cel | Singlets   | 50690       | 92.7           | 96.98            |   |  |
| 5  | 3. Trypsin Cel | Viability  | 49795       | 91.06          | 98.23            |   |  |
| 6  | 3. Trypsin Cel | Cy5+       | 1855        | 3.39           | 3.73             |   |  |
| 7  | 3. Trypsin Cel | Cy5-       | 47995       | 87.77          | 96.39            |   |  |
| 8  |                |            |             |                |                  |   |  |
| 9  |                |            |             |                |                  |   |  |
| 10 |                |            |             |                |                  |   |  |

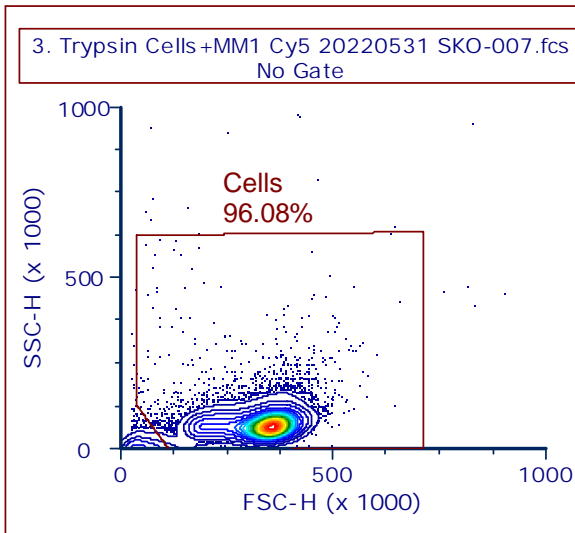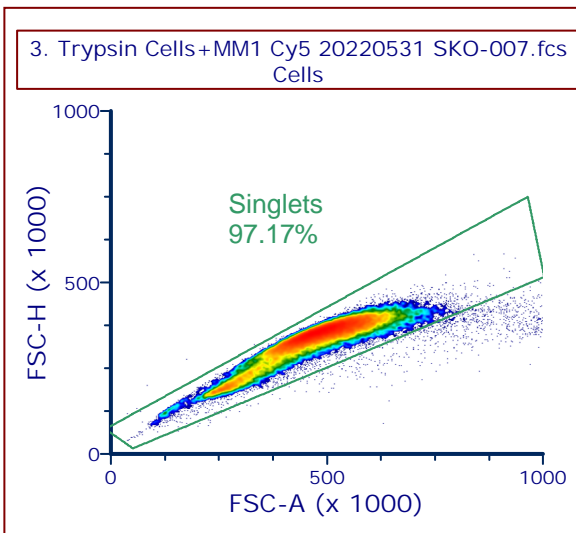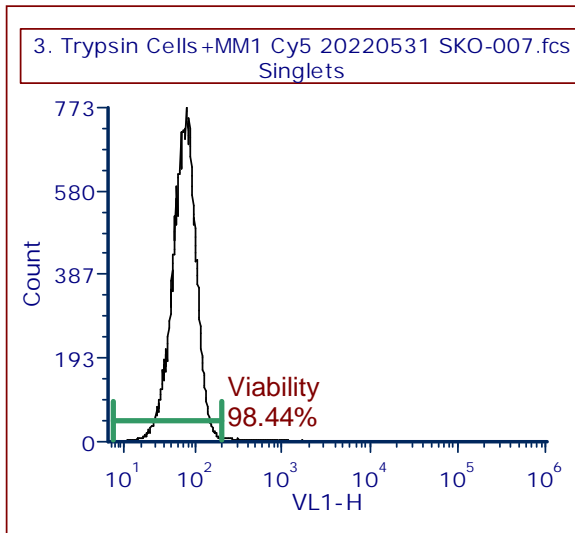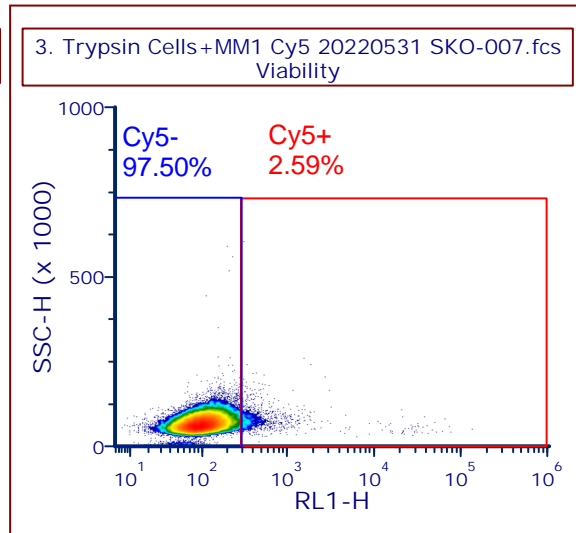

|    | A              | B          | C           | D              | E                | F |  |
|----|----------------|------------|-------------|----------------|------------------|---|--|
| 1  | Filename       | Gate       | # of Events | % of all cells | % of gated cells |   |  |
| 2  | 3. Trypsin Cel | All Events | 53059       | 100            | 100              |   |  |
| 3  | 3. Trypsin Cel | Cells      | 50979       | 96.08          | 96.08            |   |  |
| 4  | 3. Trypsin Cel | Singlets   | 49538       | 93.36          | 97.17            |   |  |
| 5  | 3. Trypsin Cel | Viability  | 48766       | 91.91          | 98.44            |   |  |
| 6  | 3. Trypsin Cel | Cy5+       | 1265        | 2.38           | 2.59             |   |  |
| 7  | 3. Trypsin Cel | Cy5-       | 47548       | 89.61          | 97.5             |   |  |
| 8  |                |            |             |                |                  |   |  |
| 9  |                |            |             |                |                  |   |  |
| 10 |                |            |             |                |                  |   |  |

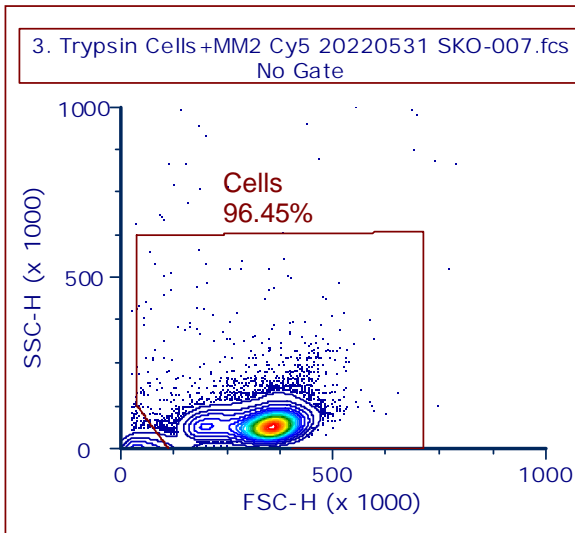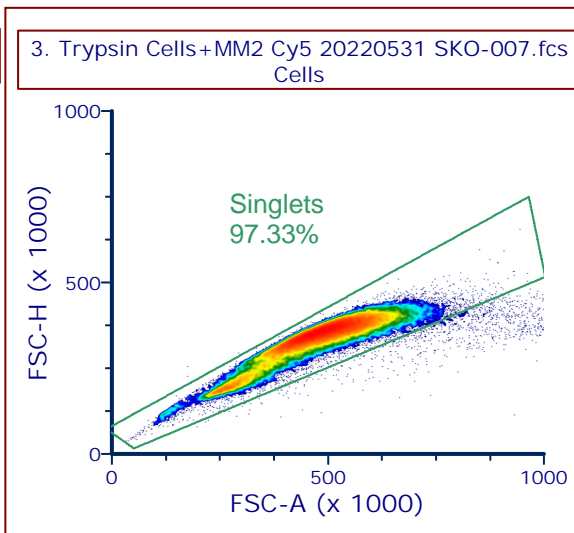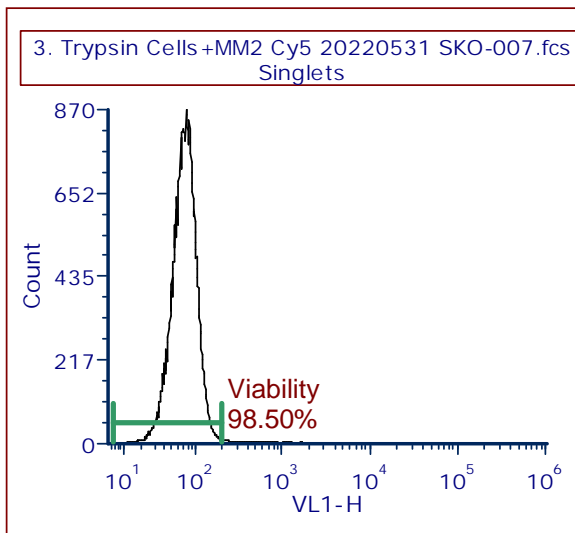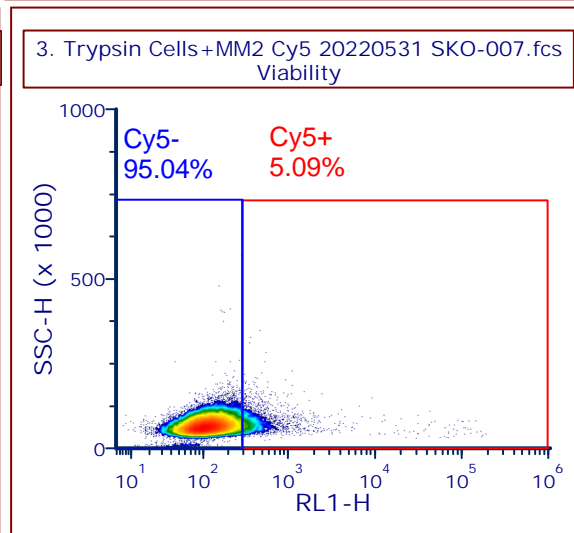

|    | A              | B          | C           | D              | E                | F |  |
|----|----------------|------------|-------------|----------------|------------------|---|--|
| 1  | Filename       | Gate       | # of Events | % of all cells | % of gated cells |   |  |
| 2  | 3. Trypsin Cel | All Events | 59597       | 100            | 100              |   |  |
| 3  | 3. Trypsin Cel | Cells      | 57482       | 96.45          | 96.45            |   |  |
| 4  | 3. Trypsin Cel | Singlets   | 55948       | 93.88          | 97.33            |   |  |
| 5  | 3. Trypsin Cel | Viability  | 55108       | 92.47          | 98.5             |   |  |
| 6  | 3. Trypsin Cel | Cy5+       | 2806        | 4.71           | 5.09             |   |  |
| 7  | 3. Trypsin Cel | Cy5-       | 52372       | 87.88          | 95.04            |   |  |
| 8  |                |            |             |                |                  |   |  |
| 9  |                |            |             |                |                  |   |  |
| 10 |                |            |             |                |                  |   |  |

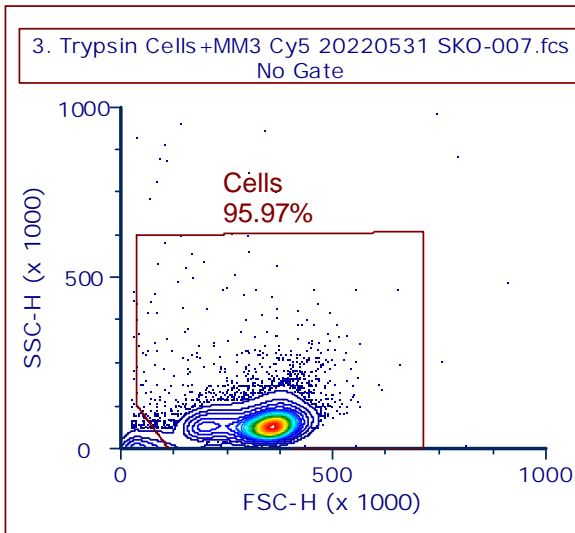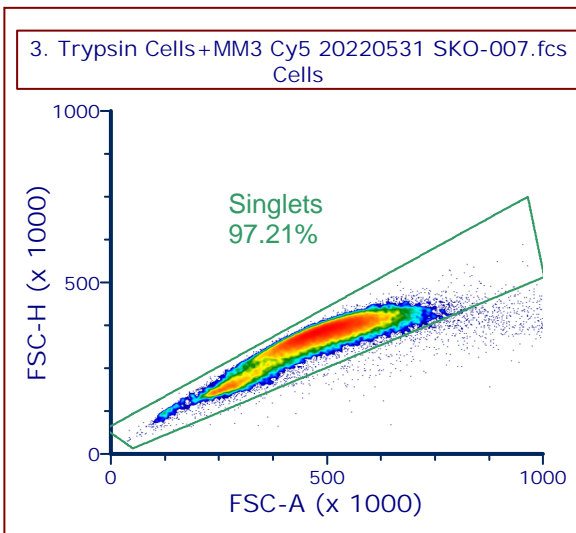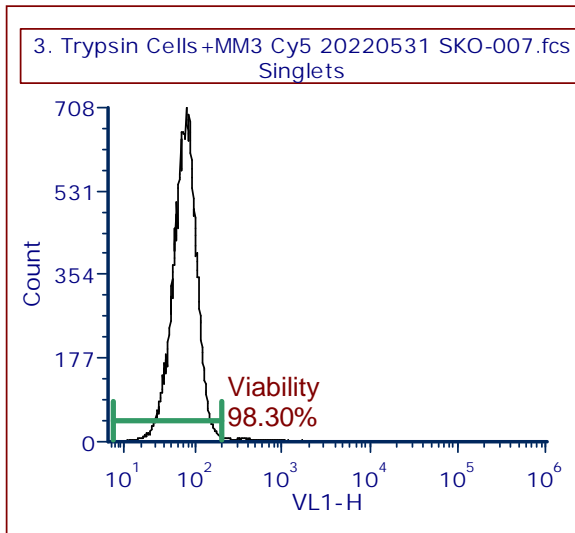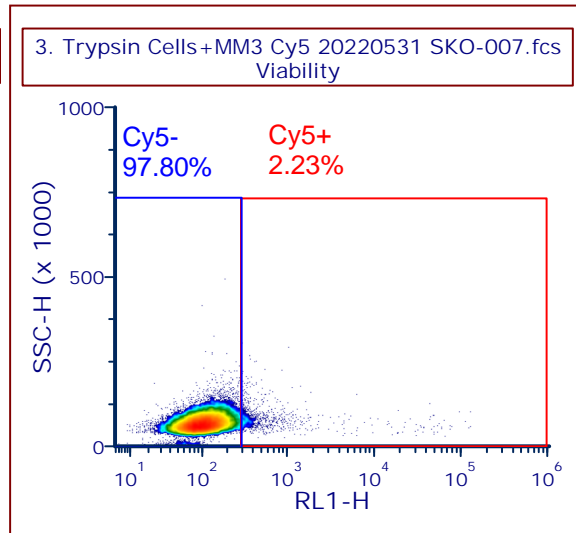

|    | A              | B          | C           | D              | E                | F |  |
|----|----------------|------------|-------------|----------------|------------------|---|--|
| 1  | Filename       | Gate       | # of Events | % of all cells | % of gated cells |   |  |
| 2  | 3. Trypsin Cel | All Events | 48593       | 100            | 100              |   |  |
| 3  | 3. Trypsin Cel | Cells      | 46634       | 95.97          | 95.97            |   |  |
| 4  | 3. Trypsin Cel | Singlets   | 45334       | 93.29          | 97.21            |   |  |
| 5  | 3. Trypsin Cel | Viability  | 44565       | 91.71          | 98.3             |   |  |
| 6  | 3. Trypsin Cel | Cy5+       | 993         | 2.04           | 2.23             |   |  |
| 7  | 3. Trypsin Cel | Cy5-       | 43585       | 89.69          | 97.8             |   |  |
| 8  |                |            |             |                |                  |   |  |
| 9  |                |            |             |                |                  |   |  |
| 10 |                |            |             |                |                  |   |  |

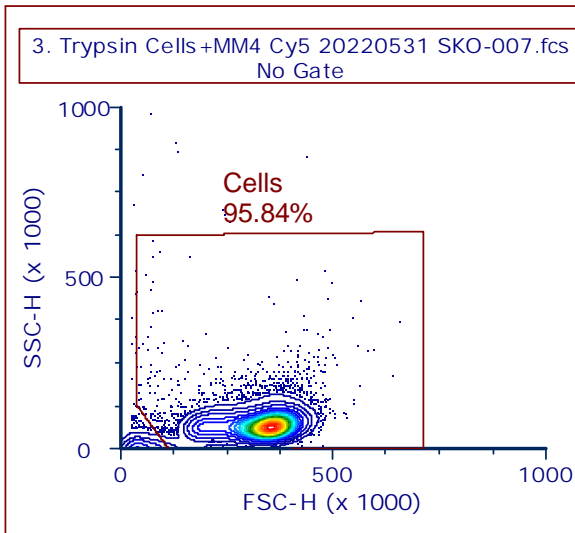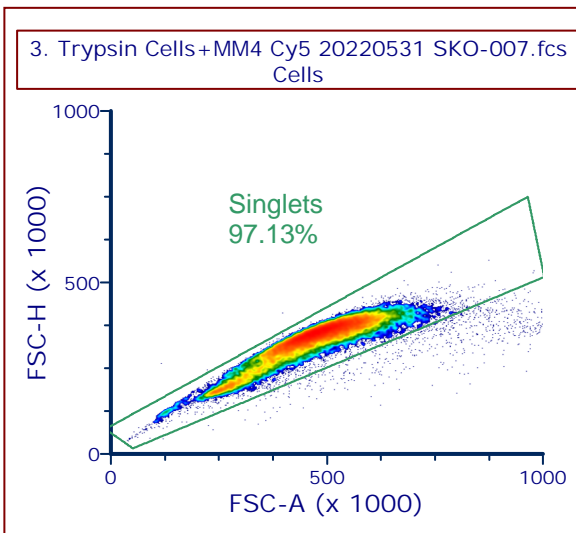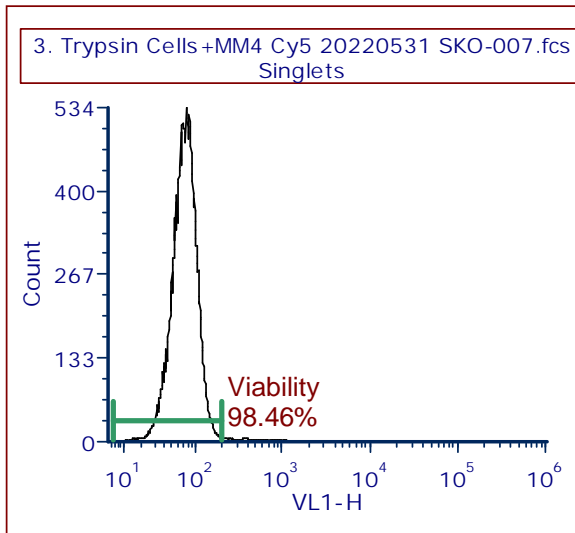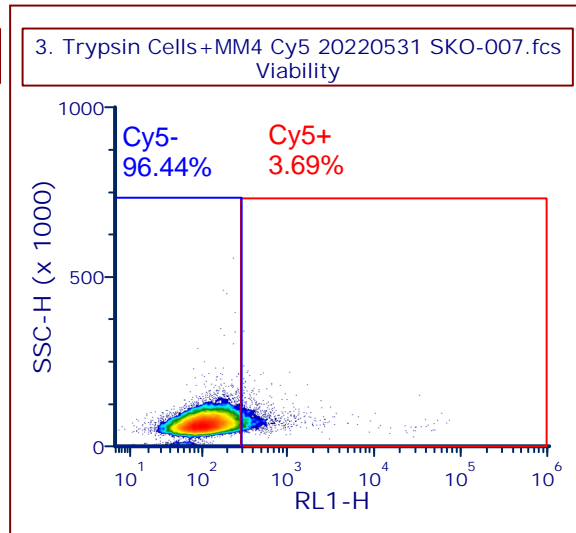

|    | A              | B          | C           | D              | E                | F |  |
|----|----------------|------------|-------------|----------------|------------------|---|--|
| 1  | Filename       | Gate       | # of Events | % of all cells | % of gated cells |   |  |
| 2  | 3. Trypsin Cel | All Events | 37656       | 100            | 100              |   |  |
| 3  | 3. Trypsin Cel | Cells      | 36090       | 95.84          | 95.84            |   |  |
| 4  | 3. Trypsin Cel | Singlets   | 35054       | 93.09          | 97.13            |   |  |
| 5  | 3. Trypsin Cel | Viability  | 34513       | 91.65          | 98.46            |   |  |
| 6  | 3. Trypsin Cel | Cy5+       | 1272        | 3.38           | 3.69             |   |  |
| 7  | 3. Trypsin Cel | Cy5-       | 33285       | 88.39          | 96.44            |   |  |
| 8  |                |            |             |                |                  |   |  |
| 9  |                |            |             |                |                  |   |  |
| 10 |                |            |             |                |                  |   |  |

3. Trypsin Cells+PC1 Cy5 20220531 SKO-007.fcs  
No Gate

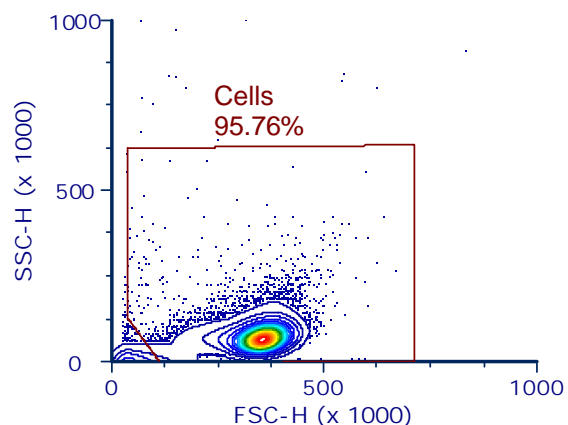

3. Trypsin Cells+PC1 Cy5 20220531 SKO-007.fcs  
Cells

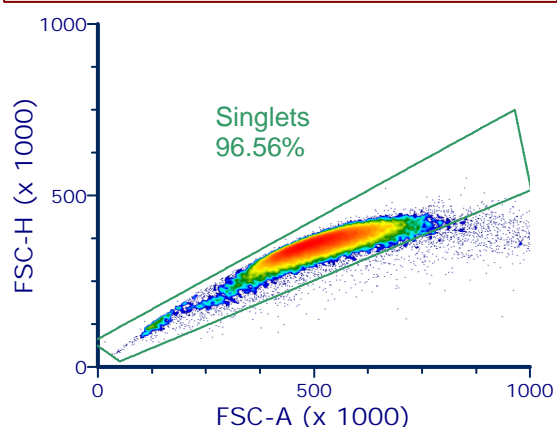

3. Trypsin Cells+PC1 Cy5 20220531 SKO-007.fcs  
Singlets

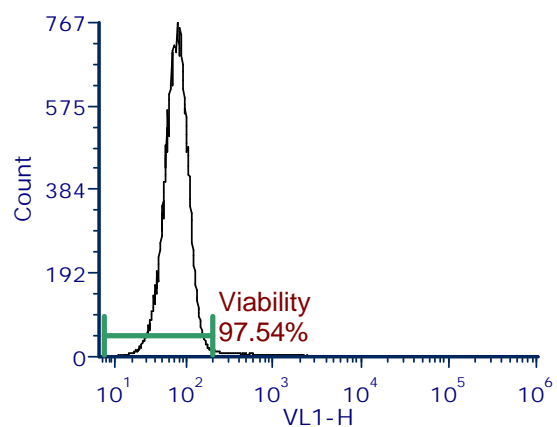

3. Trypsin Cells+PC1 Cy5 20220531 SKO-007.fcs  
Viability

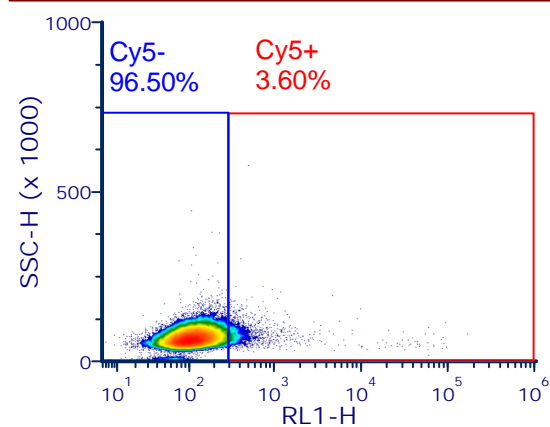

|    | A              | B          | C           | D              | E                | F |
|----|----------------|------------|-------------|----------------|------------------|---|
| 1  | Filename       | Gate       | # of Events | % of all cells | % of gated cells |   |
| 2  | 3. Trypsin Cel | All Events | 55268       | 100            | 100              |   |
| 3  | 3. Trypsin Cel | Cells      | 52926       | 95.76          | 95.76            |   |
| 4  | 3. Trypsin Cel | Singlets   | 51104       | 92.47          | 96.56            |   |
| 5  | 3. Trypsin Cel | Viability  | 49848       | 90.19          | 97.54            |   |
| 6  | 3. Trypsin Cel | Cy5+       | 1797        | 3.25           | 3.6              |   |
| 7  | 3. Trypsin Cel | Cy5-       | 48105       | 87.04          | 96.5             |   |
| 8  |                |            |             |                |                  |   |
| 9  |                |            |             |                |                  |   |
| 10 |                |            |             |                |                  |   |

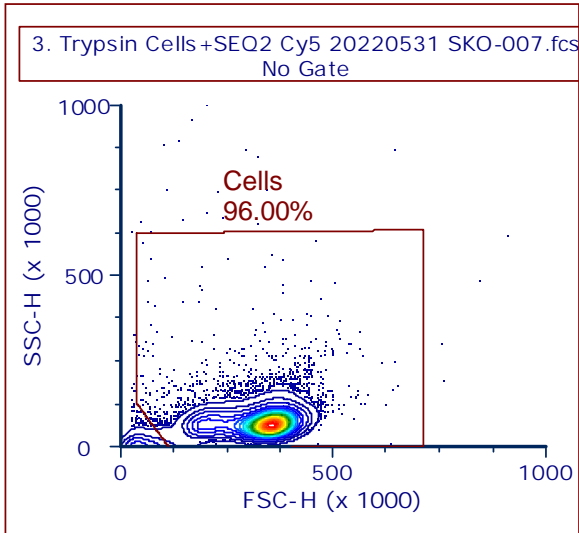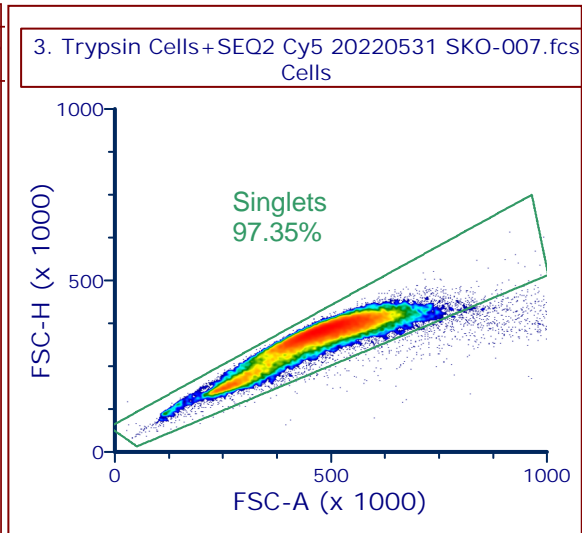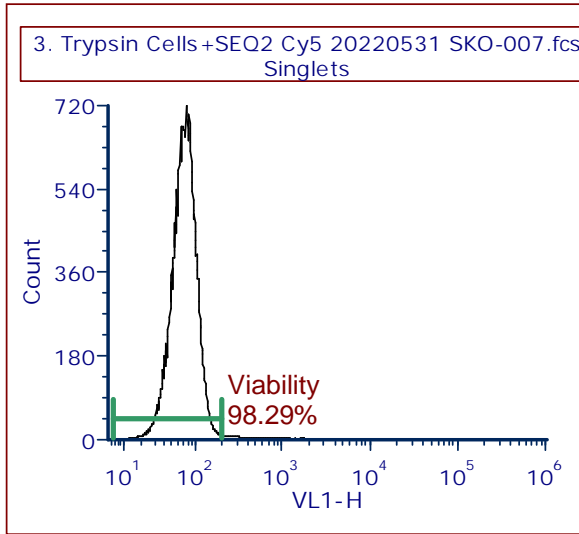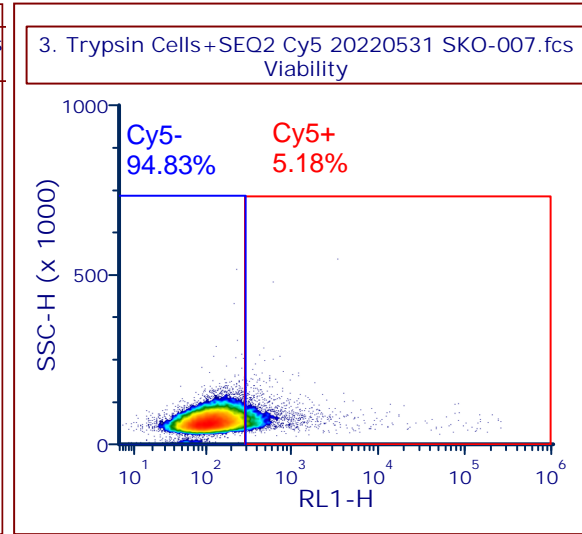

|    | A              | B          | C           | D              | E                | F |  |
|----|----------------|------------|-------------|----------------|------------------|---|--|
| 1  | Filename       | Gate       | # of Events | % of all cells | % of gated cells |   |  |
| 2  | 3. Trypsin Cel | All Events | 49868       | 100            | 100              |   |  |
| 3  | 3. Trypsin Cel | Cells      | 47873       | 96             | 96               |   |  |
| 4  | 3. Trypsin Cel | Singlets   | 46605       | 93.46          | 97.35            |   |  |
| 5  | 3. Trypsin Cel | Viability  | 45808       | 91.86          | 98.29            |   |  |
| 6  | 3. Trypsin Cel | Cy5+       | 2374        | 4.76           | 5.18             |   |  |
| 7  | 3. Trypsin Cel | Cy5-       | 43438       | 87.11          | 94.83            |   |  |
| 8  |                |            |             |                |                  |   |  |
| 9  |                |            |             |                |                  |   |  |
| 10 |                |            |             |                |                  |   |  |
